# Supplementary material for: Characterization of the Deleted in Autism 1 Protein Family: Implications for Studying Cognitive Disorders
Source: PLoS One. 2011 Jan 19;6(1):e14547. doi: 10.1371/journal.pone.0014547 (PMC3023760; doi:10.1371/journal.pone.0014547)
Supplement: Figure S3 — Amino acid sequence comparison of DIA1R proteins. The sequence alignment was generated using CLUSTALW [47]. Identical amino acids are highlighted in red font and indicated below the alignment with a red asterisk (*). Strongly similar amino acids are highlighted in green font and indicated below the alignment with a green colon (:). Weakly similar amino acids are highlighted in blue font and indicated below the alignment with a blue full stop (.). Dissimilar amino acids are in black font. Amino acid numbering is provided above the alignment. Gaps are indicated by dashes. The alignment shows 124 identical amino acids (27% identity), with a further 27% similar amino acids, providing an overall similarity of 54%. Standard single-letter amino acid abbreviations are used. A consensus line is provided below the alignment where the number “2” is inserted when no consensus amino acid is found. Organism abbreviations use the first letter of the genus name, followed by the first four letters of the species (e.g., Monodelphis domestica DIA1R is abbreviated to MdomeDIA1R). Accession numbers and full species names can be found in Table S5. (0.03 MB PDF) [file pone.0014547.s013.pdf]

**Fig. S3**

|            |                                                                |                                        |              |            |            |                 |
|------------|----------------------------------------------------------------|----------------------------------------|--------------|------------|------------|-----------------|
|            | 10                                                             | 20                                     | 30           | 40         | 50         | 60              |
| BtaurDIA1R | MEP-RLGP                                                       | KAAALHLGWPF-L                          | LLWV         | SGLSYSVSSP | ASPSPSP--V | SRVRTSYN        |
| EcabaDIA1R | MEP-WLGP                                                       | EAAALRPGWPA-L                          | LLWV         | SALRCVSSP  | ASPSPSL--V | PRVRTSYN        |
| DordiDIA1R | MDP-QLGP                                                       | EAAALHPGWQV-L                          | LLLV         | SVLSCFSSP  | ASPPPSL--V | SRVRTSYN        |
| MmulaDIA1R | MEP-QLGP                                                       | EAAALRPGWLA-L                          | LLWV         | SALSCFSLP  | ASSPSSL--V | SQVRTSYN        |
| HsapiDIA1R | MEP-QLGP                                                       | EAAALRPGWLA-L                          | LLWV         | SALSCFSLP  | ASSLSSL--V | PQVRTSYN        |
| RnorvDIA1R | MELGRP                                                         | GAAATAFRQRWPAWMLLWV                    | STLSCFSLP    | ASLPSSL--V | PRVRSYTL   | GKTFGL          |
| MmuscDIA1R | MESQWR                                                         | GAAATAFHQHWAARLLWV                     | STLSCFSLP    | ASLPSSL--V | PRVRSYTM   | GKTFGL          |
| MdomeDIA1R | MES-VIHG                                                       | PLASPCLGWLT--LLQ                       | LVTLS        | CSISTESLT  | APSS--V    | PRVKSSYN        |
| OanatDIA1R | MGL-RLGC                                                       | RLFSAAALSWMT--LLQ                      | FLTRGHGPVAD  | ASPAPSL--V | PRVKPSYS   | FGRFTFLG        |
| GgallDIA1R | MGR--WICCL                                                     | CSRVDWLM--LLV                          | LARSSNP      | SAAATASP   | ---A       | PHVRPSYS        |
| SsalaDIA1R | MPL--KRCD                                                      | QRAVGSVRLT--VCV                        | LSWLLCVCWAP  | SVVEPAGT   | PPAPQ      | QKALILQRA       |
| DreriDIA1R | -----MAG                                                       | -----I                                 | WGVWILCFILV  | GTADPS     | ---P       | APQDKSHDFRKIFLG |
| Consensus  | MEP22LGPEAAALRPGWLA2LLWVS2LSCSFSLPASPPPSLTPVPRVRTSYNFGRTFLG    |                                        |              |            |            |                 |
|            | 70                                                             | 80                                     | 90           | 100        | 110        | 120             |
| BtaurDIA1R | LDKCNACIGTSICKKFFKKEEIRFDNGLALHLGPPDDLP                        | SYSANYSDDFKTWRPVEISRL                  |              |            |            |                 |
| EcabaDIA1R | LDKCNACIGTSICKKFFKKEEIRFDNRLASHLGLPSGYLPSYSANYSDDSKTWRPVEVSRL  |                                        |              |            |            |                 |
| DordiDIA1R | LDKCNACIGTSICKKFFKKEEIRFDNSLASDLELASDYLP                       | SYSANYSDDSKTWRPVEIFRL                  |              |            |            |                 |
| MmulaDIA1R | LDKCNACIGTSICKKFFKKEEIRSDNWLASHLGLPPDFLLSY                     | PANYSDDSKIWRPVEIFRL                    |              |            |            |                 |
| HsapiDIA1R | LDKCNACIGTSICKKFFKKEEIRSDNWLASHLGLPPDSLLSY                     | PANYSDDSKIWRPVEIFRL                    |              |            |            |                 |
| RnorvDIA1R | LDKCNACIGTSICKKFFKKEEIRLDNSLVSHLGLPQDLLSY                      | ANYSDDSKTWRPVEISRL                     |              |            |            |                 |
| MmuscDIA1R | LDKCNACIGTSICKKFFKKEEIRFDNSLASHLGLPQDLHSY                      | ANYSDDSKTWRPVEISQL                     |              |            |            |                 |
| MdomeDIA1R | LDKCNACIGTSICKKFFKKEEIRFDNWLASHLKLPPDYFSTYP                    | ANYSDDTKSWRPVEISRL                     |              |            |            |                 |
| OanatDIA1R | LDKCNACIGTSICKKFFKKEEIRFDNWPASHLKPDPDPHFGYS                    | ANYTDDSKSWRLVEISRL                     |              |            |            |                 |
| GgallDIA1R | LDKCNACIGTSICKKFFKKEEIRFDTWLSSHLLKLPPSYLLSY                    | LGNYTDDAQSWRMVDITRL                    |              |            |            |                 |
| SsalaDIA1R | LDKCNACVGTICKKLLKQKIRFDWWMSPDTTLPLAEKQSF                       | PNLTDDSLWRPVVLSRL                      |              |            |            |                 |
| DreriDIA1R | LDKCNACIGTSICKKFFKDEIRFERRLTAQSNLSSADVRSYEG                    | NYTDS                                  | TAGWRPVVVSRL |            |            |                 |
| Consensus  | LDKCNACIGTSICKKFFKKEEIRFDNWLASHLGLPPD2L2SY2ANYSDDSKTWRPVEISRL  |                                        |              |            |            |                 |
|            | 130                                                            | 140                                    | 150          | 160        | 170        | 180             |
| BtaurDIA1R | VSKQQNKISDGRICASAAAPKTC                                        | SIERVLRKTRGRFQKWLQAKRLTPDLVRGLSSPLLRC  |              |            |            |                 |
| EcabaDIA1R | VSKQQNEISDRRICAFAAAPKTC                                        | SIERVLRKTRRFQKWLQAKRLTPDLVRGLPSPLLRC   |              |            |            |                 |
| DordiDIA1R | VSKEQNEISDRRICAFASAPKTC                                        | SIERILRKTRGRFQKWLQAKRLTPDLVQGLPSPFLRC  |              |            |            |                 |
| MmulaDIA1R | VSNYQNEISDRRICASASAPKTC                                        | SIERVLRKTERFQKWLQAKRLTPDLVQGLASPLLRC   |              |            |            |                 |
| HsapiDIA1R | VSKYQNEISDRRICASASAPKTC                                        | SIERVLRKTERFQKWLQAKRLTPDLVQGLASPLLRC   |              |            |            |                 |
| RnorvDIA1R | VSKYQSEISDKRICASASGPKTC                                        | SIERILRKTRGRFQKWLQAKRLTPDLVQGLPSPFLHCP |              |            |            |                 |
| MmuscDIA1R | VSRYQIEISDRRICASVSAPKTC                                        | SIERILQKTRGRFQKWLQAKRLTPDLVQGLPSPFLRC  |              |            |            |                 |
| MdomeDIA1R | ISKYQHELSDRRICASASGSKTC                                        | SIERVLRKTERVKKWLKAKRLTPDLVQGLPSPMLRC   |              |            |            |                 |
| OanatDIA1R | IGKDQNELSDQKICTSVSLVKTC                                        | SIERVLRKTERFQKWLKARLTPALVQGLPSPLLRC    |              |            |            |                 |
| GgallDIA1R | TTYQHDRADQHICTSLTKTCS                                          | LERALRRTHRFQKWLRAKRLTPDLVQGLSSPMLRC    |              |            |            |                 |
| SsalaDIA1R | SSPCLHSSSDRSICRSVGRQGPC                                        | IEAVLRVTPRFQSLNQSHLLPHIVKGLAPPLLRC     |              |            |            |                 |
| DreriDIA1R | MSPHLHLQSDNSICTSAGKGKSC                                        | IEGLRATSRFQTVWVSNLLPSMVKGLVTPMLRC      |              |            |            |                 |
| Consensus  | VSKYQNEISDRRICASASAPKTC                                        | SIERVLRKTR2RFQKWLQAKRLTPDLVQGLPSPLLRC  |              |            |            |                 |
|            | 190                                                            | 200                                    | 210          | 220        | 230        | 240             |
| BtaurDIA1R | SQRLLDRVVRRYAEVADAGSIFMDHFTDRDKLRLLYTLAVNTHPVLLQIFPGAEGWPLPQ   |                                        |              |            |            |                 |
| EcabaDIA1R | SQRLLDRVVRRYAEVDPDAGSIFMDHFTDRDKLRLLYTLAVNAHPILLQIFPGAEGWPLPR  |                                        |              |            |            |                 |
| DordiDIA1R | SQRLLDRVVRRYAEVADAGSIFMDHFTDRDKLRLLYTLAVNAHPILLQIFPGAEGWPLPK   |                                        |              |            |            |                 |
| MmulaDIA1R | SQRLLDRVVRRYAEVADAGSIFMDHFTDRDKLRLLYTLAVNSHPILLQIFPGAEGWPLPQ   |                                        |              |            |            |                 |
| HsapiDIA1R | SQRLLDRVVRRYAEVADAGSIFMDHFTDRDKLRLLYTLAVNSHPILLQIFPGAEGWPLPK   |                                        |              |            |            |                 |
| RnorvDIA1R | SQRLLDRVVRRYAEVVDAGSIFMDHFTDRDKLRLLYTLAVNAHPILLQIFPGAEGWPMPK   |                                        |              |            |            |                 |
| MmuscDIA1R | SQRLLDRVVRRYAEVVDAGSIFMDHFTAGDKLRLLYTLAVNAHPILLQIFPGAEGWPMPR   |                                        |              |            |            |                 |
| MdomeDIA1R | SQRLLDRIVVRYAEVADAGSVFMDHFTDRDKLRLLYTLAVNAHPIMLQIFPGAEGWPLPR   |                                        |              |            |            |                 |
| OanatDIA1R | TQRLLDRIVVRRYAEVDPDAGSVYMDHFTDRDKLRLLYTLVNAHPVLLQVFPGAEGWPFPPK |                                        |              |            |            |                 |
| GgallDIA1R | SQRLLDRIVVRYAEVDPDAGSIYMDHLTDQDKLRLLYTLVNSHPILLQIFPDVEGWPFPPR  |                                        |              |            |            |                 |
| SsalaDIA1R | SQRLLDRIVVRYAEVVDVGSVQMKHFSERDKLRLLYTLAVNQQLILQMFPGTEGWPFPR    |                                        |              |            |            |                 |
| DreriDIA1R | SQRLLDRIVVRYFEVTDVGSVQMKHFNEDKLRLLYTLAVNQQLILQMFPGTEGWPFPR     |                                        |              |            |            |                 |
| Consensus  | SQRLLDRVVRRYAEVADAGSIFMDHFTDRDKLRLLYTLAVNAHPILLQIFPGAEGWPLPR   |                                        |              |            |            |                 |

|            |     |     |     |     |     |     |   |   |   |   |   |   |   |   |   |   |   |   |   |   |   |   |                            |                            |   |   |   |   |   |   |   |   |   |   |   |   |   |   |   |   |   |   |   |   |   |   |   |   |   |   |   |   |   |   |   |   |   |   |   |   |
|------------|-----|-----|-----|-----|-----|-----|---|---|---|---|---|---|---|---|---|---|---|---|---|---|---|---|----------------------------|----------------------------|---|---|---|---|---|---|---|---|---|---|---|---|---|---|---|---|---|---|---|---|---|---|---|---|---|---|---|---|---|---|---|---|---|---|---|---|
|            | 250 | 260 | 270 | 280 | 290 | 300 |   |   |   |   |   |   |   |   |   |   |   |   |   |   |   |   |                            |                            |   |   |   |   |   |   |   |   |   |   |   |   |   |   |   |   |   |   |   |   |   |   |   |   |   |   |   |   |   |   |   |   |   |   |   |   |
| BtaurDIA1R | YL  | G   | S   | C   | G   | R   | F | L | V | S | T | S | T | S | P | L | Q | E | F | Y | G | A | P                          | --PDQAADLAYQLLGVLESLRSNDLN | Y | F | F | Y | F | T | H | V | D | A |   |   |   |   |   |   |   |   |   |   |   |   |   |   |   |   |   |   |   |   |   |   |   |   |   |   |
| EcabaDIA1R | YL  | G   | S   | C   | G   | R   | F | L | I | S | T | S | T | S | P | L | Q | E | F | Y | S | A | P                          | --PDQAADLAYQLLGVLESLRSNDLN | Y | F | F | Y | F | T | H | V | D | A |   |   |   |   |   |   |   |   |   |   |   |   |   |   |   |   |   |   |   |   |   |   |   |   |   |   |
| DordiDIA1R | YL  | G   | S   | C   | G   | R   | F | F | V | S | T | S | T | R | P | L | Q | E | F | Y | G | A | P                          | --PDEAADLAYQLLGVLESLRSNDLN | Y | F | F | Y | F | T | H | V | D | A |   |   |   |   |   |   |   |   |   |   |   |   |   |   |   |   |   |   |   |   |   |   |   |   |   |   |
| MmulaDIA1R | YL  | G   | S   | C   | G   | R   | F | L | V | S | T | S | T | R | P | L | Q | E | F | Y | G | A | P                          | --PDQAADLAYQLLGVLESLRSNDLN | Y | F | F | Y | F | T | H | I | D | A |   |   |   |   |   |   |   |   |   |   |   |   |   |   |   |   |   |   |   |   |   |   |   |   |   |   |
| HsapiDIA1R | YL  | G   | S   | C   | G   | R   | F | L | V | S | T | S | T | R | P | L | Q | E | F | Y | D | A | P                          | --PDQAADLAYQLLGVLESLRSNDLN | Y | F | F | Y | F | T | H | I | D | A |   |   |   |   |   |   |   |   |   |   |   |   |   |   |   |   |   |   |   |   |   |   |   |   |   |   |
| RnorvDIA1R | YL  | G   | S   | C   | G   | R   | F | L | V | S | T | S | T | R | P | L | Q | E | F | Y | D | A | P                          | --PEQAADLAYQLLGVLESLRSNDLN | Y | F | F | Y | F | T | H | V | D | A |   |   |   |   |   |   |   |   |   |   |   |   |   |   |   |   |   |   |   |   |   |   |   |   |   |   |
| MmuscDIA1R | YL  | G   | S   | C   | G   | R   | F | L | V | S | T | S | T | R | P | L | Q | E | F | Y | D | A | S                          | --PEQAADLAYQLLRVLESLRSNDLN | Y | F | F | Y | F | T | H | V | D | A |   |   |   |   |   |   |   |   |   |   |   |   |   |   |   |   |   |   |   |   |   |   |   |   |   |   |
| MdomeDIA1R | YL  | G   | S   | C   | G   | R   | F | L | V | S | T | S | T | Q | P | L | E | E | F | Y | S | S | P                          | --ADQAADLAYQLLGILDSLRNNDLN | Y | F | F | Y | F | T | R | I | D | A |   |   |   |   |   |   |   |   |   |   |   |   |   |   |   |   |   |   |   |   |   |   |   |   |   |   |
| OanatDIA1R | YL  | G   | S   | C   | G   | R   | L | V | S | T | S | T | T | P | L | L | E | L | S | S | G | P | --PDRAADLGHQLLGVIEFLRHNDWN | Y                          | F | F | Y | F | T | R | I | H | A |   |   |   |   |   |   |   |   |   |   |   |   |   |   |   |   |   |   |   |   |   |   |   |   |   |   |   |
| GgallDIA1R | YL  | G   | S   | C   | G   | R   | L | V | S | A | S | T | R | P | L | R | D | F | F | R | A | A | --PEVAADLALQLLAVLHSMGTNDLN | Y                          | F | F | Y | F | T | R | V | D | V |   |   |   |   |   |   |   |   |   |   |   |   |   |   |   |   |   |   |   |   |   |   |   |   |   |   |   |
| SsalaDIA1R | YQ  | G   | S   | C   | G   | R   | L | M | V | W | A | S | S | R | P | L | W | G | L | Y | G | S | S                          | REFVQRVDVAYQLLHITQGLGHN    | S | L | G | F | L | L | Y | T | R | L | G | E |   |   |   |   |   |   |   |   |   |   |   |   |   |   |   |   |   |   |   |   |   |   |   |   |
| DreriDIA1R | YH  | G   | S   | C   | G   | R   | L | M | V | W | A | S | R | A | L | R | T | L | F | S | S | P | --LERRADLAYQLLHITQSLSAN    | S                          | L | R | F | L | F | Y | T | R | I | P | E |   |   |   |   |   |   |   |   |   |   |   |   |   |   |   |   |   |   |   |   |   |   |   |   |   |
| Consensus  | Y   | L   | G   | S   | C   | G   | R | F | L | V | S | T | S | T | R | P | L | Q | E | F | Y | 2 | A                          | P                          | R | E | P | D | Q | A | A | D | L | A | Y | Q | L | L | G | V | L | E | S | L | R | S | N | D | L | N | Y | F | F | Y | F | T | H | V | D | A |

|            |     |     |     |     |     |     |   |   |   |   |   |   |   |   |   |   |   |   |   |   |   |   |   |   |   |   |   |   |   |   |   |          |   |   |   |   |   |   |    |   |    |   |     |   |   |    |   |    |   |   |   |   |   |   |   |   |   |   |   |
|------------|-----|-----|-----|-----|-----|-----|---|---|---|---|---|---|---|---|---|---|---|---|---|---|---|---|---|---|---|---|---|---|---|---|---|----------|---|---|---|---|---|---|----|---|----|---|-----|---|---|----|---|----|---|---|---|---|---|---|---|---|---|---|---|
|            | 310 | 320 | 330 | 340 | 350 | 360 |   |   |   |   |   |   |   |   |   |   |   |   |   |   |   |   |   |   |   |   |   |   |   |   |   |          |   |   |   |   |   |   |    |   |    |   |     |   |   |    |   |    |   |   |   |   |   |   |   |   |   |   |   |
| BtaurDIA1R | DM  | F   | G   | I   | F   | N   | N | G | H | L | F | I | R | D | A | S | A | L | G | V | I | D | R | Q | E | G | S | Q | A | A | S | --GAGDNK | D | I | F | S | C | L | -V | S | G  | C | Q   | T | K | -L | P | S  | C | D |   |   |   |   |   |   |   |   |   |
| EcabaDIA1R | GM  | F   | G   | I   | F   | N   | N | G | H | L | F | I | R | D | A | S | T | L | G | V | I | D | R | Q | E | G | S | Q | A | A | A | --RAGENK | D | I | F | S | C | L | -L | S | D  | C | Q   | A | E | -L | P | S  | C | D |   |   |   |   |   |   |   |   |   |
| DordiDIA1R | AM  | F   | G   | I   | F   | N   | N | G | H | L | F | I | R | D | A | S | A | L | G | V | I | D | K | Q | E | G | S | Q | A | A | P | --KAGENQ | D | I | F | S | C | L | -V | S | G  | C | Q   | A | Q | L  | L | P  | S | C | D |   |   |   |   |   |   |   |   |
| MmulaDIA1R | GM  | F   | G   | V   | F   | N   | N | G | H | L | F | I | R | D | A | S | A | V | G | V | I | D | K | Q | E | G | S | Q | E | A | T | --RAGENK | D | I | F | S | C | L | -V | S | G  | C | Q   | A | Q | -L | P | S  | C | E |   |   |   |   |   |   |   |   |   |
| HsapiDIA1R | GM  | F   | G   | V   | F   | N   | N | G | H | L | F | I | R | D | A | S | A | V | G | V | I | D | K | Q | E | G | S | Q | E | A | N | --RAGENK | D | I | F | S | C | L | -V | S | G  | C | Q   | A | Q | -L | P | S  | C | E |   |   |   |   |   |   |   |   |   |
| RnorvDIA1R | GM  | F   | G   | I   | F   | D   | N | G | H | L | F | I | R | D | A | S | A | L | G | I | I | D | K | Q | E | A | S | Q | A | A | D | --RTGENE | D | I | F | S | C | L | -V | S | G  | C | Q   | V | Q | -M | S | S  | C | D |   |   |   |   |   |   |   |   |   |
| MmuscDIA1R | GM  | F   | G   | I   | F   | D   | N | G | H | L | F | I | R | D | A | S | A | L | G | I | I | D | K | Q | E | G | S | Q | A | A | A | --RTGENE | D | I | F | S | C | L | -V | S | D  | C | Q   | I | Q | -L | S | S  | C | D |   |   |   |   |   |   |   |   |   |
| MdomeDIA1R | GT  | F   | G   | I   | F   | D   | N | G | H | L | F | I | R | D | A | S | T | V | G | V | I | D | K | Q | R | G | S | L | T | L | D | --RQEE   | S | K | D | I | F | S | C  | L | -V | L | D   | C | Q | S  | P | -F | P | S | C | S |   |   |   |   |   |   |   |
| OanatDIA1R | GT  | F   | G   | V   | F   | D   | N | G | H | L | F | I | R | D | A | S | S | L | G | V | I | D | R | Q | E | G | K | R | P | A | R | --SSPE   | P | R | D | I | F | S | C  | L | -A | A | D   | C | Q | S  | D | -L | P | S | C | N |   |   |   |   |   |   |   |
| GgallDIA1R | GT  | F   | G   | V   | F   | S   | N | G | H | L | F | I | R | D | A | S | T | L | G | I | I | D | K | E | E | G | S | Q | P | I | D | --GQQE   | Y | K | D | I | F | S | C  | L | -T | V | D   | C | Q | S  | A | -F | V | S | C | N |   |   |   |   |   |   |   |
| SsalaDIA1R | DM  | F   | G   | L   | L   | D   | Q | R | V | F | I | T | D | A | S | S | I | G | V | I | D | L | E | Q | G | F | P | P | D | P | S | Q        | T | G | S | D | G | D | I  | F | S  | C | L   | G | Q | G  | T | S  | P | C | H | R | S | P | P | C | S |   |   |
| DreriDIA1R | DM  | F   | G   | I   | L   | E   | D | N | K | V | F | I | V | D | T | S | T | I | G | I | I | D | L | Q | E | G | H | P | P | D | K | -DLLP    | E | L | D | V | F | S | C  | L | -S | G | --S | C | V | R  | P | P  | P | C | E |   |   |   |   |   |   |   |   |
| Consensus  | G   | M   | F   | G   | I   | F   | D | N | G | H | L | F | I | R | D | A | S | A | L | G | V | I | D | K | Q | E | G | S | Q | A | A | D        | 2 | R | A | G | E | N | K  | D | I  | F | S   | C | L | G  | V | S  | 2 | C | Q | A | Q | R | L | P | S | C | D |

|            |     |     |     |     |     |     |   |   |   |   |   |   |   |   |   |   |    |   |   |   |   |   |       |   |   |   |   |   |    |   |   |   |   |   |   |   |   |   |   |   |   |   |   |   |   |   |   |   |   |   |   |   |   |   |   |   |   |   |   |
|------------|-----|-----|-----|-----|-----|-----|---|---|---|---|---|---|---|---|---|---|----|---|---|---|---|---|-------|---|---|---|---|---|----|---|---|---|---|---|---|---|---|---|---|---|---|---|---|---|---|---|---|---|---|---|---|---|---|---|---|---|---|---|---|
|            | 370 | 380 | 390 | 400 | 410 | 420 |   |   |   |   |   |   |   |   |   |   |    |   |   |   |   |   |       |   |   |   |   |   |    |   |   |   |   |   |   |   |   |   |   |   |   |   |   |   |   |   |   |   |   |   |   |   |   |   |   |   |   |   |   |
| BtaurDIA1R | TI  | P   | E   | K   | Q   | N   | L | V | L | V | C | S | Q | V | L | P | -L | L | L | Q | A | K | ----- | F | P | S | P | V | Q  | E | E | I | D | A | E | L | T | R | C | A | D | G | T | R | P | D |   |   |   |   |   |   |   |   |   |   |   |   |   |
| EcabaDIA1R | TV  | P   | E   | K   | Q   | S   | L | V | L | V | C | R | Q | V | L | P | -R | L | L | Q | G | K | ----- | F | P | S | P | V | Q  | E | E | I | D | A | T | L | T | W | C | G | E | D | T | R | P | D |   |   |   |   |   |   |   |   |   |   |   |   |   |
| DordiDIA1R | NI  | P   | D   | K   | Q   | S   | V | L | V | L | C | Q | Q | L | L | P | -Q | L | L | Q | G | K | ----- | F | P | S | P | V | Q  | V | E | I | D | S | A | L | A | Q | C | G | Q | G | I | R | P | D |   |   |   |   |   |   |   |   |   |   |   |   |   |
| MmulaDIA1R | SV  | S   | E   | K   | Q   | S   | L | V | L | V | C | Q | K | L | L | P | -R | L | L | Q | G | R | ----- | F | P | S | P | V | Q  | D | I | D | S | A | L | A | Q | C | G | D | S | T | R | P | D |   |   |   |   |   |   |   |   |   |   |   |   |   |   |
| HsapiDIA1R | SI  | S   | E   | K   | Q   | S   | L | V | L | V | C | Q | K | L | L | P | -R | L | L | Q | G | R | ----- | F | P | S | P | V | Q  | D | I | D | S | I | L | V | Q | C | G | D | S | I | R | P | D |   |   |   |   |   |   |   |   |   |   |   |   |   |   |
| RnorvDIA1R | TV  | P   | E   | K   | Q   | N   | L | V | L | V | C | Q | Q | L | L | P | -Q | L | L | R | G | K | ----- | F | P | S | P | V | Q  | Q | E | I | D | S | A | L | S | L | C | S | K | D | A | S | T | N |   |   |   |   |   |   |   |   |   |   |   |   |   |
| MmuscDIA1R | TV  | P   | E   | K   | Q   | S   | L | V | L | V | C | Q | Q | L | L | P | -Q | L | L | Q | G | K | ----- | F | P | S | P | V | Q  | K | E | I | D | S | A | L | S | L | C | S | K | D | N | S | T | D |   |   |   |   |   |   |   |   |   |   |   |   |   |
| MdomeDIA1R | SV  | K   | E   | K   | Q   | S   | W | V | M | A | C | Q | Q | L | L | P | -Q | L | L | K | E | K | ----- | F | P | Q | P | I | Q  | E | Q | I | D | S | A | L | V | L | C | G | N | S | S | L | S | D |   |   |   |   |   |   |   |   |   |   |   |   |   |
| OanatDIA1R | TV  | Q   | E   | H   | Q   | S   | L | V | L | V | C | R | E | L | L | P | -K | L | L | E | G | K | ----- | F | P | K | P | V | Q  | E | E | I | D | A | L | L | D | R | C | G | D | S | S | L | D | G |   |   |   |   |   |   |   |   |   |   |   |   |   |
| GgallDIA1R | SI  | R   | E   | K   | Q   | S   | L | V | M | V | C | Q | E | L | L | P | -K | L | L | R | G | K | ----- | F | L | P | P | V | Q  | E | K | I | D | S | F | L | Q | H | C | A | E | G | L | A | D | D |   |   |   |   |   |   |   |   |   |   |   |   |   |
| SsalaDIA1R | SV  | R   | P   | T   | Q   | S   | L | T | L | L | C | T | A | L | P | R | L  | L | T | E | R | G | A     | Q | T | T | R | L | P  | M | E | G | A | E | A | G | R | L | A | R | D | V | P | L | L | G | V | C | A | D | P | S | Q | P | D |   |   |   |   |
| DreriDIA1R | TV  | R   | E   | A   | Q   | S   | F | I | L | L | C | K | Y | I | L | N | -N | L | L | T | S | N | ----- | D | K | Q | S | G | -L | P | R | A | A | V | D | E | L | L | V | C | A | D | P | S | Q | L | D |   |   |   |   |   |   |   |   |   |   |   |   |
| Consensus  | T   | V   | P   | E   | K   | Q   | S | L | V | L | V | C | Q | Q | L | L | P  | R | Q | L | L | Q | G     | K | G | A | Q | T | T  | R | L | P | M | E | G | 2 | 2 | F | P | S | P | V | Q | E | I | D | S | A | L | 4 | 2 | C | G | D | S | S | R | P | D |

|            |     |     |     |   |   |   |   |   |   |   |   |   |   |   |   |   |   |   |   |   |   |   |   |   |   |   |   |   |   |   |   |   |   |   |   |   |
|------------|-----|-----|-----|---|---|---|---|---|---|---|---|---|---|---|---|---|---|---|---|---|---|---|---|---|---|---|---|---|---|---|---|---|---|---|---|---|
|            | 430 | 440 | 450 |   |   |   |   |   |   |   |   |   |   |   |   |   |   |   |   |   |   |   |   |   |   |   |   |   |   |   |   |   |   |   |   |   |
| BtaurDIA1R | PE  | V   | L   | G | A | A | S | R | L | K | D | I | L | R | P | L | R | T | C | D | P | R | F | A | Y | R | Y | P | D | C | K | Y | D | D | K | F |
| EcabaDIA1R | AE  | V   | L   | G | A | A | S | R | L | K | D | I | L | R | P | L | R | T | C | D | P | R | F | A | Y | R | Y | P | D | C | K | Y | N | D | K | F |
| DordiDIA1R | SE  | V   | F   | G | A | A | S | R | L | K | D | I | L | R | P | L | R | T | C | D | P | R | F | A | Y | R | Y | P | D | C | K | Y | N | D | R | F |
| MmulaDIA1R | PE  | V   | L   | G | A | A | S | W | L | K | H | I | L | R | P | L | R | T | C | D | S | R | F | A | Y | R | Y | P | D | C | K | Y | N | D | K | F |
| HsapiDIA1R | PE  | V   | L   | G | A | A | S | Q | L | K | D | I | L | R | P | L | R | T | C | D | S | R | F | A | Y | R | Y | P | D | C | K | Y | N | D | K | F |
| RnorvDIA1R | LE  | V   | F   | G | A | T | S | L | L | K | N | I | L | R | S | L | R | T | C | D | P | R | F | A | Y | R | Y | P | D | C | K | Y | N | D | R | F |
| MmuscDIA1R | LE  | V   | L   | G | A | T | S | W | L | K | D | I | L | R | S | L | R | T | C | D | P | R | F | A | Y | R | Y | P | D | C | K | Y | N | D | R | F |
| MdomeDIA1R | QE  | V   | I   | E | A | A | S | R | L | K | A | I | L | K | P | L | R | T | C | D | P | R | Y | A | Y | R | Y | P | D | C | K | Y | S | D | R | Y |
| OanatDIA1R | QT  | V   | I   | G | A | R | R | L | M | D | I | L | K | S | L | R | T | C | D | A | R | F | A | Y | R | Y | P | D | C | K | Y | S | E | K | Y |   |
| GgallDIA1R | QD  | V   | N   | E | A | M | A | K | L | A | Q | L | L | K | P | L | R | S |   |   |   |   |   |   |   |   |   |   |   |   |   |   |   |   |   |   |
