# Supplementary material for: Characterization of the Deleted in Autism 1 Protein Family: Implications for Studying Cognitive Disorders
Source: PLoS One. 2011 Jan 19;6(1):e14547. doi: 10.1371/journal.pone.0014547 (PMC3023760; doi:10.1371/journal.pone.0014547)
Supplement: Figure S6 — Amino acid sequence comparison of DIA1L proteins. A single DIA1L protein from S. purpuratus (SpurpDIA1L) and three DIA1L paralogues from B. floridae (BflorDIA1La, BflorDIA1Lb, BflorDIA1Lc) were aligned using CLUSTALW [47]. Identical amino acids shared between all four proteins are highlighted in red font and indicated below the alignment with a red asterisk (*). Strongly similar amino acids are highlighted in green font and indicated below the alignment with a green colon (:). Weakly similar amino acids are highlighted in blue font and indicated below the alignment with a blue full stop (.). Dissimilar amino acids are in black font. Amino acid numbering is provided above the alignment. Gaps are indicated by dashes. The alignment shows 7% identical amino acids, with a further 20% similar amino acids, providing an overall similarity of 27%. Amino acid similarity and identity shared at the amino-terminal ends of the three longer DIA1L proteins are indicated using the coloured fonts described above, but the corresponding annotations (*, : and .) are in grey font below the alignment. Standard single-letter amino acid abbreviations are used. Accession numbers can be found in Table S8. (0.02 MB PDF) [file pone.0014547.s016.pdf]

**Fig. S6**

10 20 30 40 50 60 70 80 90 100

BflorDIA1Lb MASARRWCRRLHYSGWTRVLFLLTLMIAVGF IARNYWQVEDDL EARKRISNGGDKKYAQSIQELLAQGIDEKRMREALRQKAEEVHRIVKERGEALAKEA

BflorDIA1Lc -----

BflorDIA1La -----MPILVSESEAGYGGR-----HGRAMVARRMVRKCCLPLLVLSATLAVLYIYLVQVQGSPPVSLGQSQAGNKQKKDE

SpurpDIA1L ---MGPRIRKKILILGSSILFTFTVQLTGLNSL-----RD--DDNNALPSTNGKFRTFVPSKGRDRNRLLHAKGQKEELGFDKSD---TRRTL

110 120 130 140 150 160 170 180 190 200

BflorDIA1Lb QAKAKAKANVVRIINIHKPELNPENQHSWKAIEKMAAHEIDEDHKKQPEQYMTFKRLMDAKKCPACYGESICEQAEVGLITMDVADKLTLEHKG-VYFGHF

BflorDIA1Lc -----MVIADGDNDIDISWAEPE-----KCPACFGD-KCELLRRGHFVKVDESDRYMKKGIVSTGRI

BflorDIA1La YIVWRGEEQKVVEVQKKQ---EEKHHPAEPEKPKPRQKSAVTERKPKG--VPRSLLRNAPCPACLGDNLCCEFEEDG--MIDLGSEVTSWKVKAYTGTG

SpurpDIA1L QDIRTADAEIKGHPRIQAG---DETALTDQGVQGMKNATVVMTRRLQFEN--LFPSLLEEERCPLCYGTTNCDQIYAG-NISFHVGSVNLSEPH-AIRGTW

210 220 230 240 250 260 270 280 290 300

BflorDIA1Lb RNTVEVAKRLVGKDGWTRFDEFICQNASLPKDCDVSHMISDTVLVTDNVLQVSFLQDAWRIAHTRRSI--AMEACMTDRLEIELIKTAYDENVNGKLSK-

BflorDIA1Lc GGVKVIKAKSMNEAGAWQRERYERICSSSRPHVCNASSFILETMLVTDVALKVPWLREAWKICHLEKS---ALSLCVSDRFLFEDVRQLYVEDGGTDMTKEG

BflorDIA1La DKVEVMVTQCASEERLERFEFVCRNLSETATSCDPGKVLLQEDLKERLQPAHLKKSLEVFHPNPTSSQLATTCMSKPFLLKLLQKTFTDDNGNKRNLNR--

SpurpDIA1L GDRRIVGKRLVSREVFERLEKIIICNQSQVDPKRSCEVNAAATNSWMSKSSALNRVHKLHQEVYESQLIAISATTCASPDFFFEELKQLYRVSRWGTGIAS-

310 320 330 340 350 360 370 380 390 400

BflorDIA1Lb -TERAYMITALLLNPEAALLKHFTSR AEEYWPFPKYL GACGRVILVESGKLLGSAIESP--WKERANIALQLLEMIDKFRNGDPKWVVFVDFSFNFNA

BflorDIA1Lc DTGRAFLSTSLLLNEEAALLRYFTTKSTTPWPFPKFYGACGRVIVVEHAGRTLDTFMESS--WEVRADIALQLQLVLDALREKDPDWVLFDFVDFQNFNA

BflorDIA1La -----LE-----QAIPRKKLP IAFLLGACGNLVATETAGKPLSMYLEVKGPWQVRANLSSLQLQLQMLDDFQNKDPDWLLMFVEVNIENFVS

SpurpDIA1L -TEMAILATIMLNPPEALLKFFRNIPSLRPYFTEYLGECGRVILTEPSGKPLSSYLKAS--WKDRVDISLKLQMIEDFHDSDSKLQMLLLDFGYENFV

410 420 430 440 450 460 470 480 490 500

BflorDIA1Lb VNNYGRLLTLDLDDVMLIDREEFVG-----ENKTEPCDLKCFKTFISQIEAMNSYDSCSAMPQYSQMMYALACVRLLSHLPEHLSEP--NPMDPKPD

BflorDIA1Lc VDSRGWVRLIDLDDVMVIDRRTVVN-----QEQTENECNEQCYTDFQKKLYS-DEYH-CDDIFKYAPMMYASICARLLSNLQKHPERRKWKGEIREYQE

BflorDIA1La VSSDGRLLTDLGNMTIINKHDLKKN-----STKKRSSVCNEACFKRFTRNLSHRPETS-CRQAGRYSQLMYARACQRI LGCWQTERSGE--GRVVLSSS

SpurpDIA1L MTSEGQLKVNNLGGMVIVDKDQSTSTPDMNPHLNNRTELCNEDCLNTEVFKQLQTEPDTH-CREVPRHVELMYMMACHSLSLSDLMTTKYER--FFQPLDTP

510 520 530 540 550 560 570

BflorDIA1Lb KHRPDSERP--RLWLGPPEQEAQVLEELLRGCVENVAGGRLEAVGELKTFLLRRNAKGEN-----

BflorDIA1Lc GQSIELDEPPVKGF LHNPPDEIREALEGALTQCVHETLPRGRGLGAVLRQLQIILGTT-----

BflorDIA1La KDASCAYGR--GLLFGPPREAKQLEDLLTECVETKAGGRITALKQIRVLLAA-----

SpurpDIA1L R---KHHPG--GMLHDAPYEVDSVLSLELLYECVFEQGPRMHSVRVLRKLLTIIQRGFSYKDAADRTSL
