# Supplementary material for: Characterization of the Deleted in Autism 1 Protein Family: Implications for Studying Cognitive Disorders
Source: PubMed Central journal article supplement (PMC3023760; doi:10.1371/journal.pone.0014547), 2011-01-19
Supplement: pone.0014547.s001.pdf [file pone.0014547.s001.pdf]

**Table S1.** Taxa, accession numbers, and chromosome location of *DIA1* orthologues.

| Species <sup>a</sup>                     | Protein accession number    | mRNA (or EST ) accession number | Genomic DNA accession number | Chrom <sup>b</sup> | Intron(s) <sup>c</sup> | Comments                                                                                                                                                                                                                                                                                                                                                                                                                                                                                                                                                    |
|------------------------------------------|-----------------------------|---------------------------------|------------------------------|--------------------|------------------------|-------------------------------------------------------------------------------------------------------------------------------------------------------------------------------------------------------------------------------------------------------------------------------------------------------------------------------------------------------------------------------------------------------------------------------------------------------------------------------------------------------------------------------------------------------------|
| <b>METAZOA</b>                           |                             |                                 |                              |                    |                        |                                                                                                                                                                                                                                                                                                                                                                                                                                                                                                                                                             |
| <b>Cnidaria</b>                          |                             |                                 |                              |                    |                        |                                                                                                                                                                                                                                                                                                                                                                                                                                                                                                                                                             |
| <i>Nematostella vectensis</i>            | XP_001637923                | XM_001637873                    | NW_001834388                 | -                  | Yes                    | 4 exons                                                                                                                                                                                                                                                                                                                                                                                                                                                                                                                                                     |
| <b>Echinodermata</b>                     |                             |                                 |                              |                    |                        |                                                                                                                                                                                                                                                                                                                                                                                                                                                                                                                                                             |
| <i>Strongylocentrotus purpuratus</i> (a) | XP_001190365<br>(XP_782541) | XM_001190365<br>(XM_777448)     | NW_001465662                 | -                  | Yes                    | Two accession numbers representing alleles same gene (ID 577204) are provided on the NR database.<br>Annotated as incomplete at 5' end of mRNA sequence. However, by similarity to other <i>DIA1</i> sequences the sequence <i>is</i> complete, and amino acid 13 of the current database protein sequence is the predicted initiation methionine. This protein sequence has been used in our subsequent analyses. However, a Kozak consensus for echinoderms is yet to be elucidated, and there are 2 methionines close by that are possible alternatives. |
| <b>Arthropoda</b>                        |                             |                                 |                              |                    |                        |                                                                                                                                                                                                                                                                                                                                                                                                                                                                                                                                                             |
| <i>Aedes aegypti</i>                     | XP_001660317                | XM_001660267                    | NW_001811157                 | -                  | Yes                    | 4 exons                                                                                                                                                                                                                                                                                                                                                                                                                                                                                                                                                     |
| <i>Anopheles gambiae</i>                 | XP_001689408                | XM_001689356                    | NT_078267                    | 3L                 | Yes                    | 3 exons                                                                                                                                                                                                                                                                                                                                                                                                                                                                                                                                                     |
| <i>Culex pipiens</i>                     | XP_001864190                | XM_001864155                    | NW_001887202                 | -                  | Yes                    | 3 exons<br><i>C. pipiens</i> also encodes a second <i>DIA1</i> -like gene with a single intron (GeneID: 6051368) that may be a non-processed pseudogene (current accession numbers: XP_001867819 and XM_001867784). The proposed pseudogene is truncated at the C-terminus, compared to the parental gene. EST sequences are not identical to either predicted mRNA (around 90% identical to each).                                                                                                                                                         |
| <i>Drosophila ananassae</i>              | XP_001960192                | XM_001960156                    | NW_001939294                 | -                  | No                     |                                                                                                                                                                                                                                                                                                                                                                                                                                                                                                                                                             |
| <i>Drosophila erecta</i>                 | XP_001975165                | XM_001975129                    | NW_001956550                 | -                  | No                     |                                                                                                                                                                                                                                                                                                                                                                                                                                                                                                                                                             |
| <i>Drosophila melanogaster</i>           | NP_726172                   | NM_166516                       | NT_033778                    | 2R                 | No                     | Is a proposed intron in the 5'NCR.<br>Chromosome 2R is also known as Muller                                                                                                                                                                                                                                                                                                                                                                                                                                                                                 |

|                                 |              |              |              |   |     |                                                                                                                                                                                                                                                                                                                                                                                                                                                                                                                                                                                                                                                                                      |
|---------------------------------|--------------|--------------|--------------|---|-----|--------------------------------------------------------------------------------------------------------------------------------------------------------------------------------------------------------------------------------------------------------------------------------------------------------------------------------------------------------------------------------------------------------------------------------------------------------------------------------------------------------------------------------------------------------------------------------------------------------------------------------------------------------------------------------------|
|                                 |              |              |              |   |     | element C. Protein has predicted ATP binding and ATP hydrolysis motifs.                                                                                                                                                                                                                                                                                                                                                                                                                                                                                                                                                                                                              |
| <i>Drosophila persimilis</i>    | XP_002026638 | XM_002026602 | NW_001985990 | - | No  | Expected to be located on chromosome 3 ( <i>D. persimilis</i> Muller element C).                                                                                                                                                                                                                                                                                                                                                                                                                                                                                                                                                                                                     |
| <i>Drosophila pseudoobscura</i> | XP_001362056 | XM_001362019 | NC_009006    | 3 | No  | Incorrectly annotated has having 2 exons, leading the current predicted protein sequence having an extra 12 amino acids compared to DIA1 of all other <i>Drosophila</i> species. We found the first exon was not supported by EST sequence. We have used sequence supported by EST sequence and based on comparison to DIA1 from other <i>Drosophila</i> DIA1 gene models, and have therefore used amino acid 12 of the currently annotated database protein sequence as the initiation methionine for the genuine protein for all our analyses (Figure S10). This leads to a gene model where a single exon encodes the DIA1 protein. Chromosome 3 corresponds to Muller element C. |
| <i>Drosophila sechellia</i>     | XP_002039872 | XM_002039836 | NW_001999698 | - | No  | Expected to be located on chromosome 2R ( <i>D. sechellia</i> Muller element C).                                                                                                                                                                                                                                                                                                                                                                                                                                                                                                                                                                                                     |
| <i>Drosophila willistoni</i>    | XP_002062789 | XM_002062753 | NW_002032469 | - | No  | Expected to be located on chromosome 2L ( <i>D. willistoni</i> Muller element C).                                                                                                                                                                                                                                                                                                                                                                                                                                                                                                                                                                                                    |
| <i>Drosophila yakuba</i>        | XP_002092384 | XM_002092348 | NT_167063    | - | No  | Expected to be located on chromosome 2R or 2L ( <i>D. yakuba</i> Muller element C locations).                                                                                                                                                                                                                                                                                                                                                                                                                                                                                                                                                                                        |
| <i>Nasonia vitripennis</i>      | XP_001606587 | XM_001606537 | NW_001820126 | - | Yes | The current database annotation predicts 5 exons, however this is incorrect. By comparison to EST sequences the first annotated exon is wrong, and the start codon is actually found in sequence 5' to the currently annotated exon 2. The remainder of the gene annotation is correct. Our model is supported by EST sequences, and our resulting gene model has 4 exons only. The corrected amino acid sequence (Figure S10) has been used in all analyses.                                                                                                                                                                                                                        |

|                               |                        |                        |                        |    |     |                                                                                                                                                                                                                                                                                                                                                                                                                                                                     |
|-------------------------------|------------------------|------------------------|------------------------|----|-----|---------------------------------------------------------------------------------------------------------------------------------------------------------------------------------------------------------------------------------------------------------------------------------------------------------------------------------------------------------------------------------------------------------------------------------------------------------------------|
| <b>Chordata</b>               |                        |                        |                        |    |     |                                                                                                                                                                                                                                                                                                                                                                                                                                                                     |
| Urochordata                   |                        |                        |                        |    |     |                                                                                                                                                                                                                                                                                                                                                                                                                                                                     |
| <i>Ciona intestinalis</i>     | XP_002120404           | XM_002120368           | NW_001954917           | -  | Yes | 8 exons                                                                                                                                                                                                                                                                                                                                                                                                                                                             |
| Cephalochordata               |                        |                        |                        |    |     |                                                                                                                                                                                                                                                                                                                                                                                                                                                                     |
| <i>Branchiostoma floridae</i> | XP_002593078           | XM_002593032           | NW_003101409           | -  | Yes | BRAFLDRAFT_72848<br>Gene ID 7229409<br>4 exons                                                                                                                                                                                                                                                                                                                                                                                                                      |
| Vertebrata                    |                        |                        |                        |    |     |                                                                                                                                                                                                                                                                                                                                                                                                                                                                     |
| Actinopterygii                |                        |                        |                        |    |     |                                                                                                                                                                                                                                                                                                                                                                                                                                                                     |
| <i>Danio rerio</i> (a)        | NP_001007437           | NM_001007436           | NC_007113              | 2  | Yes | 3 exons (with another with 5'NCR only)<br>98% similar and 88% identical to <i>D. rerio</i><br>DIA1b (see below) at the amino acid level,<br>77% identical at the mRNA level, and 42%<br>identical at the genomic level (including<br>intronic sequence, but not 5' or 3' non-<br>coding sequences).                                                                                                                                                                 |
| <i>Danio rerio</i> (b)        | NP_001108398           | NM_001114926           | NC_007135              | 24 | Yes | 3 exons annotated.<br>98% similar and 88% identical to <i>D. rerio</i><br>DIA1a (see above) at the amino acid level,<br>and 77% identical at the mRNA level, and<br>42% identical at the genomic level<br>(including intronic sequence, but not 5' or 3'<br>non-coding sequences).                                                                                                                                                                                  |
| <i>Gasterosteus aculeatus</i> | ENSGACP<br>00000004897 | ENSGACT<br>00000004911 | ENSGACG<br>00000003735 | -  | Yes | Incorrect gene model currently on<br>ENSEMBL database with 4 exons (one<br>encoding only 2 amino acids). The model<br>has been corrected to a model with 3 exons,<br>which matches that of other DIA1 genes. In<br>addition, two amino acids have been added<br>to C-terminus of database protein sequence,<br>which then reaches the stop codon of gene,<br>which is not present in the current<br>annotation. The correct sequence can be<br>found in Figure S10. |
| <i>Oryzias latipes</i>        | ENSORLP<br>00000012699 | ENSORLT<br>00000012700 | ENSORLG<br>00000010126 | 20 | Yes | ENSEMBL identifiers.<br>Two amino acids have been added to C-<br>terminus of database protein sequence, to<br>reach stop codon of gene.<br>The correct sequence can be found in<br>Figure S10.                                                                                                                                                                                                                                                                      |

|                               |                        |                        |                        |        |     |                                                                                                                                                                                                                                                                                                                                                                                                                                                                                                                                                                                                     |
|-------------------------------|------------------------|------------------------|------------------------|--------|-----|-----------------------------------------------------------------------------------------------------------------------------------------------------------------------------------------------------------------------------------------------------------------------------------------------------------------------------------------------------------------------------------------------------------------------------------------------------------------------------------------------------------------------------------------------------------------------------------------------------|
| <i>Takifugu rubripes</i>      | ENSTRUP<br>00000045614 | ENSTRUT<br>00000045768 | ENSTRUG<br>00000017793 | -      | Yes | ENSEMBL identifiers                                                                                                                                                                                                                                                                                                                                                                                                                                                                                                                                                                                 |
| <i>Tetraodon nigroviridis</i> | CAG04280               | -                      | CAAE01014737           | 6      | Yes | 3 exons                                                                                                                                                                                                                                                                                                                                                                                                                                                                                                                                                                                             |
| Tetrapoda                     |                        |                        |                        |        |     |                                                                                                                                                                                                                                                                                                                                                                                                                                                                                                                                                                                                     |
| Aves                          |                        |                        |                        |        |     |                                                                                                                                                                                                                                                                                                                                                                                                                                                                                                                                                                                                     |
| <i>Gallus gallus</i>          | XP_422591              | XM_422591              | NW_001471743           | 9      | Yes | 3 exons                                                                                                                                                                                                                                                                                                                                                                                                                                                                                                                                                                                             |
| Amphibia                      |                        |                        |                        |        |     |                                                                                                                                                                                                                                                                                                                                                                                                                                                                                                                                                                                                     |
| <i>Xenopus tropicalis</i>     | NP_001120404           | NM_001126932           | -                      | -      | -   |                                                                                                                                                                                                                                                                                                                                                                                                                                                                                                                                                                                                     |
| Mammalia                      |                        |                        |                        |        |     |                                                                                                                                                                                                                                                                                                                                                                                                                                                                                                                                                                                                     |
| <i>Bos taurus</i>             | XP_586239              | XM_586239              | NW_001493763           | 1      | Yes | 3 exons                                                                                                                                                                                                                                                                                                                                                                                                                                                                                                                                                                                             |
| <i>Canis familiaris</i>       | XP_854190              | XM_849097              | NW_876276              | 23     | Yes | 3 exons                                                                                                                                                                                                                                                                                                                                                                                                                                                                                                                                                                                             |
| <i>Homo sapiens</i>           | NP_775823              | NM_173552              | NC_000003              | 3q24   | Yes | Annotated as isoform 'a'. A shorter splice variant also exists, and is currently under further investigation.                                                                                                                                                                                                                                                                                                                                                                                                                                                                                       |
| <i>Macaca mulatta</i>         | XP_001111676           | XM_001111676           | NW_001112571           | 2      | Yes | 3 exons                                                                                                                                                                                                                                                                                                                                                                                                                                                                                                                                                                                             |
| <i>Monodelphis domestica</i>  | XP_001372012           | XM_001371975           | NW_001581995           | 7      | Yes | 3 exons                                                                                                                                                                                                                                                                                                                                                                                                                                                                                                                                                                                             |
| <i>Mus musculus</i>           | NP_001028317           | NM_001033145           | NC_000075              | 9 E3.3 | Yes | 3 exons                                                                                                                                                                                                                                                                                                                                                                                                                                                                                                                                                                                             |
| <i>Pan troglodytes</i>        | XP_516799              | XM_516799              | NW_001232838           | 3      | Yes | 3 exons                                                                                                                                                                                                                                                                                                                                                                                                                                                                                                                                                                                             |
| <i>Pongo pygmaeus</i>         | ENSPPYP<br>00000015862 | ENSPPYT<br>00000143058 | ENSPPYG<br>00000014182 | 3      | Yes | ENSEMBL identifiers                                                                                                                                                                                                                                                                                                                                                                                                                                                                                                                                                                                 |
| <i>Pteropus vampyrus</i>      | ENSPVAP<br>00000008197 | ENSPVAT<br>00000008685 | ENSPVAG<br>00000008686 | -      | Yes | ENSEMBL identifiers                                                                                                                                                                                                                                                                                                                                                                                                                                                                                                                                                                                 |
| <i>Rattus norvegicus</i>      | NP_001127944           | NM_001134472           | NC_005107              | 8q31   | Yes | Reference database gene model available during this study had 5 exons and correlates to accession numbers XP_236403/XM_236493. This was not supported by EST sequence, had 2 extra exons, and an additional 184 N-terminal amino acids compared with DIA1 from all other mammals. We annotated a corrected gene model (Figure S10) based on the mRNA sequence given in NM_001134472, for which there is EST evidence, and which correlates with the gene model for other mammalian <i>DIA1</i> genes. Just prior to submission of this paper the incorrect version was withdrawn from the database. |

|                           |                        |                        |                        |   |     |                     |
|---------------------------|------------------------|------------------------|------------------------|---|-----|---------------------|
| <i>Tursiops truncatus</i> | ENSTTRP<br>00000004302 | ENSTTRT<br>00000004566 | ENSTTRG<br>00000004571 | - | Yes | ENSEMBL identifiers |
|---------------------------|------------------------|------------------------|------------------------|---|-----|---------------------|

<sup>a</sup>Orthologues are only present in Metazoa.

<sup>b</sup>Chromosome location (and map position if available).

<sup>c</sup>Intron(s) disrupting coding sequence (if genomic sequence was available).
