# Supplementary material for: Characterization of the Deleted in Autism 1 Protein Family: Implications for Studying Cognitive Disorders
Source: PubMed Central journal article supplement (PMC3023760; doi:10.1371/journal.pone.0014547), 2011-01-19
Supplement: pone.0014547.s002.pdf [file pone.0014547.s002.pdf]

**Table S2.** Taxa, accession numbers and chromosome location of partial *DIA1* orthologues.

| Species <sup>a</sup>            | Protein accession number or identifier | mRNA (or EST ) accession number or identifier | Genomic DNA accession number or identifier | Chrom <sup>b</sup> | Intron(s) <sup>c</sup> | Comments                                                                                                                                    |
|---------------------------------|----------------------------------------|-----------------------------------------------|--------------------------------------------|--------------------|------------------------|---------------------------------------------------------------------------------------------------------------------------------------------|
| <b>METAZOA</b>                  |                                        |                                               |                                            |                    |                        |                                                                                                                                             |
| <b><u>Platyhelminthes</u></b>   |                                        |                                               |                                            |                    |                        |                                                                                                                                             |
| <i>Schistosoma mansoni</i>      | -                                      | CD093176 & BU770455                           | -                                          | -                  | -                      | Non-overlapping ESTs.                                                                                                                       |
| <b><u>Hemichordata</u></b>      |                                        |                                               |                                            |                    |                        |                                                                                                                                             |
| <i>Saccoglossus kowalevskii</i> | -                                      | FF496411                                      | -                                          | -                  | -                      | EST sequence.                                                                                                                               |
| <b><u>Mollusca</u></b>          |                                        |                                               |                                            |                    |                        |                                                                                                                                             |
| <i>Lottia gigantea</i>          | -                                      | FC757266                                      | -                                          | -                  | -                      | EST                                                                                                                                         |
| <i>Mytilus californianus</i>    | -                                      | ES736823                                      | -                                          | -                  | -                      | EST                                                                                                                                         |
| <i>Venerupis decussatus</i>     | -                                      | AM869986                                      | -                                          | -                  | -                      | EST                                                                                                                                         |
| <b><u>Annelida</u></b>          |                                        |                                               |                                            |                    |                        |                                                                                                                                             |
| <i>Helobdella robusta</i>       | HELRO10585                             | -                                             | scaffold_18                                |                    | Yes                    | JGI identifier.                                                                                                                             |
| <i>Capitella</i> sp.            | -                                      | EY608635                                      | -                                          | -                  | -                      | EST                                                                                                                                         |
| <i>Hirudo medicinalis</i>       | -                                      | EY484180                                      | -                                          | -                  | -                      | EST                                                                                                                                         |
| <i>Tubifex tubifex</i>          | -                                      | EY450728                                      | -                                          | -                  | -                      | EST                                                                                                                                         |
| <b><u>Arthropoda</u></b>        |                                        |                                               |                                            |                    |                        |                                                                                                                                             |
| <i>Apis mellifera</i>           | -                                      | -                                             | NW_001254902                               | -                  | -                      | Genomic sequence found by BLAST, correct gene yet to be annotated.                                                                          |
| <i>Bombyx mori</i>              | BGIBMGA 004346-PA                      | BGIBMGA 004346-TA                             | BGIBMGA 004346                             | -                  | Yes                    | Silkworm genome database identifiers.                                                                                                       |
| <i>Drosophila simulans</i>      |                                        |                                               | Chr2R_random: 2756013,2756201              | 2R                 | -                      | <i>Drosophila</i> species genome BLAST at <a href="http://insects.eugenes.org/species/blast/">http://insects.eugenes.org/species/blast/</a> |
| <i>Ixodes scapularis</i>        | EEC05416                               | -                                             | DS703671                                   | -                  | Yes                    | WGS sequence                                                                                                                                |
| <i>Pediculus humanus</i>        | EEB19697                               | -                                             | DS235874                                   | -                  | Yes                    | WGS sequence                                                                                                                                |
| <i>Triboleum castaneum</i>      | XP_001815292                           | XM_001815240                                  | NW_001092881                               | -                  | Yes                    | Contains gene annotation errors. By similarity to all other <i>DIA1</i> genes, the sequence has regions missing.                            |
| <b><u>Chordata</u></b>          |                                        |                                               |                                            |                    |                        |                                                                                                                                             |
| <b><u>Urochordata</u></b>       |                                        |                                               |                                            |                    |                        |                                                                                                                                             |
| <i>Ciona savignyi</i>           | -                                      | -                                             | reflig_11 Positions 606,676 to 606,885     | -                  | -                      | Identifiers from the <i>Ciona savignyi</i> database at the Broad Institute                                                                  |

|                                |   |                                     |             |   |   |                                                                                                                                                                                                                                                                                                                                                                                                                         |
|--------------------------------|---|-------------------------------------|-------------|---|---|-------------------------------------------------------------------------------------------------------------------------------------------------------------------------------------------------------------------------------------------------------------------------------------------------------------------------------------------------------------------------------------------------------------------------|
| <i>Halocynthia roretzi</i>     | - | DB634200                            | -           | - | - | EST                                                                                                                                                                                                                                                                                                                                                                                                                     |
| Vertebrata                     |   |                                     |             |   |   |                                                                                                                                                                                                                                                                                                                                                                                                                         |
| Cephalaspidomorphi*            |   |                                     |             |   |   |                                                                                                                                                                                                                                                                                                                                                                                                                         |
| <i>Petromyzon marinus</i>      | - | -                                   | Contig84862 | - | - | ENSEMBL genomic BLAST<br>No further sequence available near start of contig to try to generate a gene model.                                                                                                                                                                                                                                                                                                            |
| Actinopterygii                 |   |                                     |             |   |   |                                                                                                                                                                                                                                                                                                                                                                                                                         |
| <i>Gadus morhua</i>            | - | EX722062                            | -           | - | - | EST                                                                                                                                                                                                                                                                                                                                                                                                                     |
| <i>Haplochromis matumbi</i>    | - | DB869638                            | -           | - | - | EST                                                                                                                                                                                                                                                                                                                                                                                                                     |
| <i>Pimephales promelas</i> (a) | - | DT206727,<br>DT232116 &<br>DT131905 | -           | - | - | Overlapping 5' EST sequences<br>Homologue of <i>D. rerio</i> <i>DIA1a</i> (see data below):<br><br>Comparison of 127 amino acids translation product with <i>D. rerio</i> <i>DIA1a</i> gene product-<br>98% similar<br>98% identical<br>Protein BLAST E-value 1e-69<br><br>Comparison of 127 amino acids with <i>D. rerio</i> <i>DIA1b</i> gene product:<br>85% similar<br>97% identical<br>Protein BLAST E-value 1e-55 |
| <i>Pimephales promelas</i> (b) | - | DT148813 &<br>DT1248813             | -           | - | - | Overlapping 5' ESTs<br>Homologue of <i>D. rerio</i> <i>DIA1b</i> (see data below):<br><br>Comparison of 190 amino acids translation product with <i>D. rerio</i> <i>DIA1b</i> gene product-<br>98% similar<br>100% identical<br>Protein BLAST E-value 9e-109<br><br>Comparison of 190 amino acids with <i>D. rerio</i> <i>DIA1a</i> gene product:<br>90% similar<br>99% identical<br>Protein BLAST E-value 2e-100       |
| Tetrapoda                      |   |                                     |             |   |   |                                                                                                                                                                                                                                                                                                                                                                                                                         |
| Aves                           |   |                                     |             |   |   |                                                                                                                                                                                                                                                                                                                                                                                                                         |
| <i>Taeniopygia gutta</i>       | - | DV580069                            | -           | - | - | EST                                                                                                                                                                                                                                                                                                                                                                                                                     |
| Reptilia                       |   |                                     |             |   |   |                                                                                                                                                                                                                                                                                                                                                                                                                         |
| <i>Anolis carolinensis</i>     | - | FG707981                            | -           | - | - | EST                                                                                                                                                                                                                                                                                                                                                                                                                     |

|                                      |                    |                    |                    |   |     |                                                                                                                                                                       |
|--------------------------------------|--------------------|--------------------|--------------------|---|-----|-----------------------------------------------------------------------------------------------------------------------------------------------------------------------|
| Amphibia                             |                    |                    |                    |   |     |                                                                                                                                                                       |
| <i>Xenopus laevis</i>                | NP_001089508       | NM_001096039       | -                  | - | -   | Annotated as a full length protein, but by similarity to other DIA1 genes it is not full length, and lacks sequence encoding the C-terminal ~100 amino acids of DIA1. |
| Mammalia                             |                    |                    |                    |   |     |                                                                                                                                                                       |
| <i>Cavia porcellus</i>               | ENSCPOP00000008356 | ENSCPOT00000009393 | ENSCPOG00000009308 | - | Yes | ENSEMBL identifiers                                                                                                                                                   |
| <i>Dasyops novemcinctus</i>          | ENSDNOP00000013657 | ENSNDOT00000017609 | ENSNOG00000017610  | - | Yes | ENSEMBL identifiers                                                                                                                                                   |
| <i>Echinops telfairi</i>             |                    |                    |                    |   |     |                                                                                                                                                                       |
| <i>Equus caballus</i>                | ENSECAP00000006978 | ENSECAT00000009203 | ENSECAG00000009060 | - | 16  | ENSEMBL identifiers                                                                                                                                                   |
| <i>Erinaceus europaeus</i>           |                    |                    |                    |   |     |                                                                                                                                                                       |
| <i>Felis catus</i>                   | ENSFCAP00000005560 | ENSFCAT00000005987 | ENSFCAG00000005985 | - | Yes | ENSEMBL identifiers                                                                                                                                                   |
| <i>Loxodonta africana</i>            | ENSLAFP00000003853 | ENSLAFT00000004614 | ENSLAFG00000004615 | - | Yes | ENSEMBL identifiers                                                                                                                                                   |
| <i>Microcebus murinus</i>            | ENSMICP00000011901 | ENSMICT00000013056 | ENSMICG00000013066 | - | Yes | ENSEMBL identifiers<br>Is almost full length, except for what appears to be a single nucleotide deletion in exon 1. This is probably a sequencing error.              |
| <i>Mustela putorius</i>              | -                  | GD183634           | -                  | - | -   | EST                                                                                                                                                                   |
| <i>Myotis lucifugus</i>              | ENSMLUP00000002419 | ENSMLUT00000002662 | ENSMLUG00000002662 | - | Yes | ENSEMBL identifiers                                                                                                                                                   |
| <i>Ochotona princeps</i>             | ENSOPRP00000005737 | ENSOPRT00000006256 | ENSOPRG00000006267 | - | Yes | ENSEMBL identifiers                                                                                                                                                   |
| <i>Ornithorhynchus anatinus</i>      | ENSOANP00000017787 | ENSOANT00000017790 | ENSOANG00000011229 | - | Yes | ENSEMBL identifiers                                                                                                                                                   |
| <i>Oryctolagus cuniculus</i>         | ENSOCUP00000010859 | ENSOCUT00000012614 | ENSOCUG00000012616 | - | Yes | ENSEMBL identifiers                                                                                                                                                   |
| <i>Otolemur garnetti</i>             | ENSOGAP00000010287 | ENSOGAT00000011491 | ENSOGAG00000011489 | - | Yes | ENSEMBL identifiers                                                                                                                                                   |
| <i>Papio anubis</i>                  | -                  | FC112759           | -                  | - | -   | EST                                                                                                                                                                   |
| <i>Pongo abelii</i>                  | -                  | CR856552           | -                  | - | -   | EST                                                                                                                                                                   |
| <i>Procapra capensis</i>             | ENSPCAP00000010296 | ENSPCAT00000011030 | ENSPCAG00000011077 |   | Yes | ENSEMBL identifiers.<br>Would be full length except for what appears to be a single nucleotide deletion in exon 1. This is probably a sequencing error.               |
| <i>Spermophilus tridecemlineatus</i> | ENSSTOP00000014040 | ENSSTOT00000015685 | ENSSTOG00000015680 | - | Yes | ENSEMBL identifiers                                                                                                                                                   |
| <i>Sus scrofa</i>                    | -                  | DN130313           | -                  | - | -   | EST sequence.                                                                                                                                                         |
| <i>Tupaia belangeri</i>              | ENSTBEP00000013350 | ENSTBET00000015387 | ENSTBEG00000015399 | - | Yes | ENSEMBL identifiers                                                                                                                                                   |

<sup>a</sup>Orthologues are only present in the Metazoa.

<sup>b</sup>Chromosome location.

<sup>c</sup>Intron(s) disrupting coding sequence (if genomic sequence was available).

\*Classification of extant lamprey as Cephalaspidomorphi (Nelson JS, 1994<sup>¶</sup>) is controversial, and more recently lampreys have been classified in the class Petromyzontida or Hyperoartia [93].

<sup>¶</sup>Nelson JS (1994) *Fishes of the World* (3rd edition). New York: John Wiley and Sons.
