# Supplementary material for: Characterization of the Deleted in Autism 1 Protein Family: Implications for Studying Cognitive Disorders
Source: PubMed Central journal article supplement (PMC3023760; doi:10.1371/journal.pone.0014547), 2011-01-19
Supplement: pone.0014547.s004.pdf [file pone.0014547.s004.pdf]

**Table S4.** Pairwise comparison of DIA1 and DIA1R proteins.

| Protein                                       |                      | DIA1               |       |       |       |       |       |       |       |       | DIA1R              |       |       |       |       |       |       |       |    |
|-----------------------------------------------|----------------------|--------------------|-------|-------|-------|-------|-------|-------|-------|-------|--------------------|-------|-------|-------|-------|-------|-------|-------|----|
|                                               | Species <sup>a</sup> | Hsapi <sup>b</sup> | Mmula | Btaur | Mmusc | Rnorv | Mdome | Ggall | Dr(a) | Dr(b) | Hsapi <sup>b</sup> | Mmula | Btaur | Mmusc | Rnorv | Mdome | Ggall | Dreri |    |
| Percentage amino acid similarity <sup>c</sup> | DIA1                 |                    |       |       |       |       |       |       |       |       |                    |       |       |       |       |       |       |       |    |
|                                               |                      | Hsapi              | -     | 100   | 99    | 98    | 98    | 97    | 90    | 78    | 82                 | 28    | 29    | 28    | 26    | 26    | 29    | 28    | 27 |
|                                               |                      | Mmula              | 100   | -     | 99    | 98    | 98    | 97    | 90    | 78    | 82                 | 28    | 29    | 28    | 26    | 26    | 29    | 28    | 27 |
|                                               |                      | Btaur              | 100   | 100   | -     | 98    | 98    | 97    | 90    | 78    | 82                 | 28    | 29    | 28    | 26    | 26    | 29    | 28    | 27 |
|                                               |                      | Mmusc              | 99    | 99    | 99    | -     | 100   | 96    | 89    | 78    | 82                 | 28    | 29    | 27    | 27    | 27    | 29    | 28    | 27 |
|                                               |                      | Rnorv              | 99    | 99    | 99    | 100   | -     | 96    | 89    | 78    | 82                 | 28    | 29    | 27    | 27    | 27    | 29    | 28    | 27 |
|                                               |                      | Mdome              | 99    | 99    | 100   | 99    | 99    | -     | 88    | 77    | 82                 | 28    | 28    | 28    | 26    | 27    | 27    | 29    | 27 |
|                                               |                      | Ggall              | 96    | 96    | 96    | 99    | 96    | 96    | -     | 78    | 82                 | 29    | 29    | 28    | 27    | 27    | 28    | 28    | 29 |
|                                               |                      | Dreri(a)           | 96    | 96    | 96    | 97    | 95    | 96    | 95    | -     | 88                 | 28    | 28    | 28    | 26    | 27    | 27    | 26    | 25 |
|                                               |                      | Dreri(b)           | 97    | 97    | 97    | 97    | 97    | 97    | 97    | 98    | -                  | 28    | 28    | 28    | 25    | 26    | 28    | 29    | 26 |
|                                               |                      | DIA1R              |       |       |       |       |       |       |       |       |                    |       |       |       |       |       |       |       |    |
|                                               |                      | Hsapi              | 62    | 62    | 62    | 63    | 63    | 62    | 62    | 62    | 62                 | -     | 97    | 83    | 81    | 80    | 74    | 65    | 45 |
|                                               |                      | Mmula              | 63    | 63    | 63    | 64    | 64    | 63    | 63    | 63    | 62                 | 99    | -     | 83    | 81    | 83    | 73    | 64    | 44 |
|                                               |                      | Btaur              | 61    | 61    | 61    | 64    | 64    | 62    | 62    | 63    | 62                 | 96    | 94    | -     | 79    | 78    | 70    | 62    | 46 |
|                                               |                      | Mmusc              | 63    | 63    | 63    | 64    | 64    | 62    | 64    | 63    | 62                 | 94    | 95    | 93    | -     | 91    | 71    | 63    | 45 |
|                                               |                      | Rnorv              | 60    | 60    | 60    | 60    | 60    | 62    | 60    | 62    | 62                 | 95    | 94    | 94    | 97    | -     | 70    | 61    | 45 |
|                                               |                      | Mdome              | 63    | 63    | 63    | 63    | 63    | 63    | 63    | 65    | 62                 | 91    | 91    | 90    | 90    | 89    | -     | 66    | 48 |
|                                               | Ggall                | 61                 | 61    | 61    | 61    | 61    | 62    | 62    | 63    | 63    | 87                 | 87    | 86    | 86    | 86    | 90    | -     | 45    |    |
|                                               | Dreri                | 59                 | 59    | 59    | 59    | 59    | 60    | 62    | 60    | 60    | 78                 | 78    | 77    | 76    | 76    | 78    | 76    | -     |    |

<sup>a</sup>Species with both a DIA1 and DIA1R orthologue (on the current databases) are presented.

<sup>b</sup>Species abbreviations are the first letter of the genus name, followed by the first four letters of the species name e.g. Homo sapiens = Hsapi. Full details of species names and protein accession numbers can be found in from Tables S1 and S5.

<sup>c</sup>The percent identity (above diagonal) and similarity (below diagonal) between proteins aligned pair-wise using CLUSTALW [47] are displayed.
