# Supplementary material for: Characterization of the Deleted in Autism 1 Protein Family: Implications for Studying Cognitive Disorders
Source: PubMed Central journal article supplement (PMC3023760; doi:10.1371/journal.pone.0014547), 2011-01-19
Supplement: pone.0014547.s005.pdf [file pone.0014547.s005.pdf]

**Table S5.** Taxa, accession numbers and chromosome location of full-length *DIA1R* orthologues.

| Species <sup>a</sup>   | Protein accession number          | mRNA (or EST ) accession number   | Genomic DNA accession number or identifier | Chrom <sup>b</sup> | Intron(s) <sup>c</sup> | Comments                                                                                                                                                                                                                                                                                                                                                                                                                                                                                                                                                                                                                                                                                                                                                                                                                                                       |
|------------------------|-----------------------------------|-----------------------------------|--------------------------------------------|--------------------|------------------------|----------------------------------------------------------------------------------------------------------------------------------------------------------------------------------------------------------------------------------------------------------------------------------------------------------------------------------------------------------------------------------------------------------------------------------------------------------------------------------------------------------------------------------------------------------------------------------------------------------------------------------------------------------------------------------------------------------------------------------------------------------------------------------------------------------------------------------------------------------------|
| <b>METAZOA</b>         |                                   |                                   |                                            |                    |                        |                                                                                                                                                                                                                                                                                                                                                                                                                                                                                                                                                                                                                                                                                                                                                                                                                                                                |
| <b><u>Chordata</u></b> |                                   |                                   |                                            |                    |                        |                                                                                                                                                                                                                                                                                                                                                                                                                                                                                                                                                                                                                                                                                                                                                                                                                                                                |
| Vertebrata             |                                   |                                   |                                            |                    |                        |                                                                                                                                                                                                                                                                                                                                                                                                                                                                                                                                                                                                                                                                                                                                                                                                                                                                |
| Actinopterygii         |                                   |                                   |                                            |                    |                        |                                                                                                                                                                                                                                                                                                                                                                                                                                                                                                                                                                                                                                                                                                                                                                                                                                                                |
| <i>Danio rerio</i>     | XP_697696                         | XM_692604                         | NW_001879471                               | 9                  | Yes                    | 5 exons                                                                                                                                                                                                                                                                                                                                                                                                                                                                                                                                                                                                                                                                                                                                                                                                                                                        |
| <i>Salmo salar</i>     | NP_001133357                      | NM_001139885                      | -                                          | -                  | -                      | EST sequence                                                                                                                                                                                                                                                                                                                                                                                                                                                                                                                                                                                                                                                                                                                                                                                                                                                   |
| Tetrapoda              |                                   |                                   |                                            |                    |                        |                                                                                                                                                                                                                                                                                                                                                                                                                                                                                                                                                                                                                                                                                                                                                                                                                                                                |
| Aves                   |                                   |                                   |                                            |                    |                        |                                                                                                                                                                                                                                                                                                                                                                                                                                                                                                                                                                                                                                                                                                                                                                                                                                                                |
| <i>Gallus gallus</i>   | XP_416761                         | XM_416761                         | NW_001471534                               | 1                  | Yes                    | Currently annotated with only 4 exons, but should have 5 exons, by comparison with other vertebrate <i>DIA1R</i> genes. This error has resulted in the incorrect 5' mRNA sequence and N-terminal protein sequence being placed on the reference database. Correct sequence is present in genomic sequence (and is not due to a gap in genomic sequence). All subsequent analyses have been done using the corrected sequence (see Figure S10).                                                                                                                                                                                                                                                                                                                                                                                                                 |
| Mammalia               |                                   |                                   |                                            |                    |                        |                                                                                                                                                                                                                                                                                                                                                                                                                                                                                                                                                                                                                                                                                                                                                                                                                                                                |
| <i>Bos taurus</i>      | NP_001030572                      | NM_001035495                      | NC_007331                                  | X                  | Yes                    | 5 exons                                                                                                                                                                                                                                                                                                                                                                                                                                                                                                                                                                                                                                                                                                                                                                                                                                                        |
| <i>Dipodomys ordii</i> | ENSDORP00000008924                | ENSDORT00000009500                | ENSDORG00000009502                         | -                  | Yes                    | ENSEMBL identifiers                                                                                                                                                                                                                                                                                                                                                                                                                                                                                                                                                                                                                                                                                                                                                                                                                                            |
| <i>Equus caballus</i>  | ENSECAP00000014058 (XP_001490801) | ENSECAT00000017314 (XM_001490751) | ENSECAG00000016492 (NW_001877040)          | X                  | Yes                    | ENSEMBL identifiers (reference database accession numbers are in brackets, as these differ from the current ENSEMBL model, and are not correct). The current reference database protein has incorrect N-terminal protein sequence. Furthermore, the current reference assembly based on EquCab2, annotates two separate, but adjacent, <i>DIA1R</i> homologues each other on chromosome X. (The second has accession numbers XP_001917806 and XM_001917771.) The presence of two <i>DIA1R</i> homologues is not supported by an ENSEMBL genomic BLAST search (data not shown). Rather these two RefSeq entries and separate genes (LOC100050952 and LOC100147123) encode the N-terminal and C-terminal halves of the correct <i>DIA1R</i> gene product. A corrected gene model was created and a corrected gene product used in all analyses (see Figure S10). |

|                                 |              |              |              |        |     |                                                                                                                                                                                                                                                                                                                                                                                                                                                                                                                                                                                                                                                                                                                              |
|---------------------------------|--------------|--------------|--------------|--------|-----|------------------------------------------------------------------------------------------------------------------------------------------------------------------------------------------------------------------------------------------------------------------------------------------------------------------------------------------------------------------------------------------------------------------------------------------------------------------------------------------------------------------------------------------------------------------------------------------------------------------------------------------------------------------------------------------------------------------------------|
| <i>Homo sapiens</i>             | NP_789789    | NM_176819    | NC_000023    | Xp11.3 | Yes | The accession numbers refer to the full length human DIA1R orthologue. When this paper was being prepared, the reference database had only annotated a shorter splice variant, not the true DIA1R orthologue, which was obtained manually from the genomic sequence. Our non-annotated gene had 5 exons, and has since been placed on the database (annotated as isoform '1'), while the short gene (and only gene originally annotated) has only 3 exons (now referred to as isoform '2'). We are currently investigating splice variants of human DIA1R further.                                                                                                                                                           |
| <i>Macaca mulatta</i>           | XP_001098371 | XM_001098371 | NW_001218116 | X      | Yes | 5 exons                                                                                                                                                                                                                                                                                                                                                                                                                                                                                                                                                                                                                                                                                                                      |
| <i>Monodelphis domestica</i>    | XP_001377879 | XM_001377842 | NW_001581956 | 4      | Yes | 5 exons                                                                                                                                                                                                                                                                                                                                                                                                                                                                                                                                                                                                                                                                                                                      |
| <i>Ornithorhynchus anatinus</i> | XP_001512494 | XM_001512444 | NW_001794129 | -      | Yes | 5 exons                                                                                                                                                                                                                                                                                                                                                                                                                                                                                                                                                                                                                                                                                                                      |
| <i>Mus musculus</i>             | NP_780437    | NM_175228    | NC_000086    | X A1.3 | Yes | 5 exons                                                                                                                                                                                                                                                                                                                                                                                                                                                                                                                                                                                                                                                                                                                      |
| <i>Rattus norvegicus</i>        | XP_576913    | XM_576913    | NW_048034    | Xq12   | Yes | 5 exons<br>During our analyses, we found that the splice donor, intron phase, and site for intron 1 insertion within the coding sequence, is incorrect. This is by comparison with other mammalian DIA1R genes. This has been caused by gaps in database sequence available in this region (indicated by 'N's in this genomic region). This has lead to a phase 0 intron being annotated, rather than a phase 1, like other mammalian DIA1R genes. This error, however, has only resulted in one erroneous amino acid in the resulting protein on the database, and the corrected protein (see Figure S10) has been included in our analyses. The gene was not further included in our intronic analyses, due to this error. |

<sup>a</sup>Orthologues were restricted to the phylum Metazoa.

<sup>b</sup>Chromosome location (and map position if available).

<sup>c</sup>Intron(s) disrupting coding sequence *only* were determined (if genomic sequence was available).
