# Supplementary material for: Characterization of the Deleted in Autism 1 Protein Family: Implications for Studying Cognitive Disorders
Source: PubMed Central journal article supplement (PMC3023760; doi:10.1371/journal.pone.0014547), 2011-01-19
Supplement: pone.0014547.s006.pdf [file pone.0014547.s006.pdf]

**Table S6.** Taxa, accession numbers and chromosome location of partial *DIA1R* orthologues.

| Species <sup>a</sup>       | Protein accession number or identifier            | mRNA (or EST) accession number or identifier      | Genomic DNA accession number or identifier        | Chrom <sup>b</sup> | Intron(s) <sup>c</sup> | Comments                                                                                                                                                                                                                      |
|----------------------------|---------------------------------------------------|---------------------------------------------------|---------------------------------------------------|--------------------|------------------------|-------------------------------------------------------------------------------------------------------------------------------------------------------------------------------------------------------------------------------|
| <b>METAZOA</b>             |                                                   |                                                   |                                                   |                    |                        |                                                                                                                                                                                                                               |
| <b>Chordata</b>            |                                                   |                                                   |                                                   |                    |                        |                                                                                                                                                                                                                               |
| Vertebrata                 |                                                   |                                                   |                                                   |                    |                        |                                                                                                                                                                                                                               |
| Cephalaspidomorphi         |                                                   |                                                   |                                                   |                    |                        |                                                                                                                                                                                                                               |
| <i>Petromyzon marinus</i>  | -                                                 | -                                                 | Contig40181                                       | -                  | Yes                    | ENSEMBL genomic BLAST                                                                                                                                                                                                         |
| Chondrichthyes             |                                                   |                                                   |                                                   |                    |                        |                                                                                                                                                                                                                               |
| <i>Leucoraja erinacea</i>  | -                                                 | EE990465                                          | -                                                 | -                  | -                      | EST                                                                                                                                                                                                                           |
| <i>Squalus acanthias</i>   | -                                                 | CX663166                                          | -                                                 | -                  | -                      | EST                                                                                                                                                                                                                           |
| Actinopterygii             |                                                   |                                                   |                                                   |                    |                        |                                                                                                                                                                                                                               |
| <i>Ictalurus punctatus</i> | -                                                 | GH685824                                          | -                                                 | -                  | -                      | EST                                                                                                                                                                                                                           |
| Tetrapoda                  |                                                   |                                                   |                                                   |                    |                        |                                                                                                                                                                                                                               |
| Aves                       |                                                   |                                                   |                                                   |                    |                        |                                                                                                                                                                                                                               |
| <i>Taeniopygia guttata</i> | ESTGUP00000006234                                 | ESTGUT00000006296                                 | ESTGUG00000006967                                 | -                  | Yes                    | ENSEMBL identifiers<br>First exon appears incorrect on current draft.                                                                                                                                                         |
| Amphibia                   |                                                   |                                                   |                                                   |                    |                        |                                                                                                                                                                                                                               |
| <i>Ambystoma tigrinum</i>  | -                                                 | CN052543                                          | -                                                 | -                  | -                      | EST sequence                                                                                                                                                                                                                  |
| Mammalia                   |                                                   |                                                   |                                                   |                    |                        |                                                                                                                                                                                                                               |
| <i>Canis familiaris</i>    | ENSCAFP000000031380<br>and<br>ENSCAFP000000021608 | ENSRAFT000000036049<br>and<br>ENSRAFT000000023268 | ENSRAFG000000023457<br>and<br>ENSRAFG000000014656 | X                  | Yes                    | The first ENSEMBL identifiers match the N-terminal region of <i>DIA1R</i> and the second identifiers match the C-terminal region (both on X chromosome scaffold). Gaps in genomic sequence have led to gene modelling errors. |
| <i>Cavia porcellus</i>     | ENSCPO00000008663                                 | ENSCPOT00000009737                                | ENSCPOG00000009650                                | -                  | Yes                    | ENSEMBL identifiers                                                                                                                                                                                                           |
| <i>Dasyus novemcinctus</i> | ENSDNOP000000013850                               | ENSNDNOT000000017850                              | ENSNDNOG000000017852                              | -                  | Yes                    | ENSEMBL identifiers                                                                                                                                                                                                           |
| <i>Echinops telfairi</i>   | ENSETEP000000015464                               | ENSETET000000019037                               | ENSETEG000000019037                               | -                  | Yes                    | ENSEMBL identifiers                                                                                                                                                                                                           |
| <i>Erinaceus europaeus</i> | ENSEEUP000000000288                               | ENSEEUT000000000324                               | ENSEEUG000000000323                               | -                  | Yes                    | ENSEMBL identifiers                                                                                                                                                                                                           |
| <i>Felis catus</i>         | ENSFCAP000000008763                               | ENSFCAT000000009451                               | ENSFCAG000000009449                               | -                  | Yes                    | ENSEMBL identifiers                                                                                                                                                                                                           |
| <i>Loxodonta africana</i>  | ENSLAFP000000005064                               | ENSLAFT000000006035                               | ENSLAFG000000006035                               | -                  | Yes                    | ENSEMBL identifiers                                                                                                                                                                                                           |
| <i>Felis catus</i>         | ENSFCAP000000008763                               | ENSFCAT000000009451                               | ENSFCAG000000009449                               | -                  | Yes                    | ENSEMBL identifiers                                                                                                                                                                                                           |
| <i>Microcebus murinus</i>  | ENSMICP000000013720                               | ENSMICT000000015048                               | ENSMICG000000015058                               | -                  | Yes                    | ENSEMBL identifiers                                                                                                                                                                                                           |

|                                      |                    |                    |                     |   |     |                                                                                                                                                                                                                                                                                                                                                                                                    |
|--------------------------------------|--------------------|--------------------|---------------------|---|-----|----------------------------------------------------------------------------------------------------------------------------------------------------------------------------------------------------------------------------------------------------------------------------------------------------------------------------------------------------------------------------------------------------|
| <i>Myotis lucifugus</i>              | ENSMLUP0000001597  | ENSMLUT0000001744  | ENSMLUG0000001741   | - | Yes | ENSEMBL identifiers                                                                                                                                                                                                                                                                                                                                                                                |
| <i>Ochotona princeps</i>             | ENSOPRP00000008092 | ENSOPRT00000008840 | ENSOPRG00000008844  | - | Yes | ENSEMBL identifiers                                                                                                                                                                                                                                                                                                                                                                                |
| <i>Oryctolagus cuniculus</i>         | ENSOCUP00000012696 | ENSOCUT00000014763 | ENSOCUG00000014763  | - | Yes | ENSEMBL identifiers                                                                                                                                                                                                                                                                                                                                                                                |
| <i>Otelemur garnettii</i>            | ENSOGAP00000001890 | ENSOGAT00000002117 | ENSOGAG00000002115  | - | Yes | ENSEMBL identifiers                                                                                                                                                                                                                                                                                                                                                                                |
| <i>Pan troglodytes</i>               | ENSPTRP00000055446 | ENSPTRT00000063901 | ENSPTRG000000034190 | - |     | ENSEMBL identifiers<br>On the reference database the equivalent sequence is currently annotated as a pseudogene (Accession number XR_020904).                                                                                                                                                                                                                                                      |
| <i>Pongo pygmaeus</i>                | ENSPPYP00000022690 | ENSPPYT00000023651 | ENSPPYG00000029273  | X | Yes | ENSEMBL identifiers                                                                                                                                                                                                                                                                                                                                                                                |
| <i>Pteropus vampyrus</i>             | ENSPVAP00000004149 | ENSPVAT00000004383 | ENSPVAG00000004383  | - | Yes | ENSEMBL identifiers                                                                                                                                                                                                                                                                                                                                                                                |
| <i>Rattus norvegicus</i>             | XP_576913          | XM_576913          | NW_048034           | X | Yes | A large gap in the current genomic sequence, means the reference database sequence does not correspond to the expected full length protein/mRNA/gene sequence and is incorrect.                                                                                                                                                                                                                    |
| <i>Sorex araneus</i>                 | ENSSARP00000004306 | ENSSART00000004738 | ENSSARG00000004729  | - | Yes | ENSEMBL identifiers                                                                                                                                                                                                                                                                                                                                                                                |
| <i>Spermophilus tridecemlineatus</i> | ENSSTOP00000002079 | ENSSTOT00000002324 | ENSSTOG00000002326  | - | Yes | ENSEMBL identifiers<br>Current mRNA is predicted from 8 exons, rather than the expected 5 exons (as for most vertebrate DIA1R sequences). The most likely scenario is that there are several base mis-calls in the genomic sequence, which has led to prediction of 3 incorrect introns, which currently consist of 1, 2, or 2 bp only. This sequence has therefore not been used in our analyses. |
| <i>Tarsius syrichta</i>              | ENSTSY00000012353  | ENSTSYT00000013464 | ENSTSYG00000013470  | - | Yes | ENSEMBL identifiers                                                                                                                                                                                                                                                                                                                                                                                |
| <i>Tupaia belangeri</i>              | ENSTBEP00000005669 | ENSTBET00000006583 | ENSTBEG00000006593  | - | Yes | ENSEMBL identifiers                                                                                                                                                                                                                                                                                                                                                                                |
| <i>Tursiops truncatus</i>            | ENSTTRP00000006398 | ENSTTRT00000006766 | ENSTTRG00000006768  | - | Yes | ENSEMBL identifiers                                                                                                                                                                                                                                                                                                                                                                                |

<sup>a</sup>Orthologues are only present in the phylum Metazoa.

<sup>b</sup>Chromosome location, if available.

<sup>c</sup>Intron(s) disrupting coding sequence, if genomic sequence was available.
