# Supplementary material for: Characterization of the Deleted in Autism 1 Protein Family: Implications for Studying Cognitive Disorders
Source: PubMed Central journal article supplement (PMC3023760; doi:10.1371/journal.pone.0014547), 2011-01-19
Supplement: pone.0014547.s007.pdf [file pone.0014547.s007.pdf]

**Table S7.** Comparison of *Ciona intestinalis* DIA1 to DIA1 and DIA1R from other species.

|                              | Protein <sup>a</sup>              | DIA1  |       |       |          | DIA1R |       |       |       |
|------------------------------|-----------------------------------|-------|-------|-------|----------|-------|-------|-------|-------|
|                              | Species <sup>b</sup>              | Hsapi | Mmusc | Ggall | Dreri(a) | Hsapi | Mmusc | Ggall | Dreri |
| BLAST results <sup>c</sup>   | BLAST<br>with<br>Cinte<br>DIA1    | 7e-31 | 7e-32 | 2e-31 | 8e-34    | 4e-28 | 9e-27 | 3e-22 | 1e-23 |
|                              | BLAST<br>against<br>Cinte<br>DIA1 | 7e-32 | 9e-33 | 9e-33 | 2e-34    | 3e-29 | 7e-29 | 2e-27 | 4e-24 |
| CLUSTAL results <sup>d</sup> | Identity<br>to<br>Cinte<br>DIA1   | 23%   | 23%   | 24%   | 24%      | 22%   | 22%   | 23%   | 21%   |
|                              | Similarity<br>to<br>Cinte<br>DIA1 | 55%   | 54%   | 54%   | 58%      | 54%   | 54%   | 56%   | 56%   |

<sup>a</sup>Comparisons were made between CinteDIA1 (the *DIA1* gene product from *C. intestinalis*) and key vertebrate species where both full-length DIA1 and DIA1R sequences were available for comparison. For *D. rerio*, the DIA1a paralogue was used.

<sup>b</sup>Organism abbreviations use the first letter of the genus name, followed by the first four letters of the species (e.g. *Mus musculus* is abbreviated to Mmusc). Accession numbers and full species names can be found in Tables S1 and S5.

<sup>c</sup>E-values were generated by BLASTP and reciprocal BLASTP [46] and measure the statistical significance threshold for protein sequence matches. The smaller the E-value, the better the match, and the more similar the two proteins. Computer shorthand is used for E-values (e.g. 5e-01 = 0.5 and 5e-04 = 0.0005).

<sup>d</sup>Percentage of amino acids identical or similar to *C. intestinalis* DIA1 were determined by pairwise CLUSTALW alignments [47].
