# Supplementary material for: Characterization of the Deleted in Autism 1 Protein Family: Implications for Studying Cognitive Disorders
Source: PubMed Central journal article supplement (PMC3023760; doi:10.1371/journal.pone.0014547), 2011-01-19
Supplement: pone.0014547.s009.pdf [file pone.0014547.s009.pdf]

**Table S9.** Amino acid comparisons between DIA1L and DIA1 proteins.

| Species              | Protein | <i>S. purpuratus</i> |      | <i>B. floridae</i> |        |        |      |
|----------------------|---------|----------------------|------|--------------------|--------|--------|------|
|                      |         | DIA1L                | DIA1 | DIA1La             | DIA1Lb | DIA1Lc | DIA1 |
| <i>S. purpuratus</i> | DIA1L   | -                    | 15%  | 18%                | 21%    | 16%    | 17%  |
|                      | DIA1    | 42%                  | -    | 16%                | 19%    | 20%    | 38%  |
| <i>B. floridae</i>   | DIA1La  | 49%                  | 49%  | -                  | 24%    | 22%    | 19%  |
|                      | DIA1Lb  | 52%                  | 46%  | 58%                | -      | 17%    | 19%  |
|                      | DIA1Lc  | 62%                  | 54%  | 54%                | 54%    | -      | 21%  |
|                      | DIA1    | 43%                  | 73%  | 53%                | 49%    | 56%    | -    |

Note: dash indicates 100% amino acid identity, as determined by pair-wise CLUSTALW analyses [47]. Amino acid identity values are above the dashed diagonal 'line'. Amino acid similarity values are below the dashed 'line'.
