# Supplementary material for: Characterization of the Deleted in Autism 1 Protein Family: Implications for Studying Cognitive Disorders
Source: PubMed Central journal article supplement (PMC3023760; doi:10.1371/journal.pone.0014547), 2011-01-19
Supplement: pone.0014547.s010.pdf [file pone.0014547.s010.pdf]

**Table S10.** Taxa, accession numbers and chromosome location of partial *DIA1L* paralogues.

| Species <sup>a</sup>              | Protein accession number | mRNA (or EST ) accession number | Genomic DNA accession number | Intron(s) <sup>b</sup>                                          | Comments                                                                                                                                                                                                                                                                                                                                                                                                                                                                                                                                                                                                                                                                                                                                                                                                                                                                                                                                      |
|-----------------------------------|--------------------------|---------------------------------|------------------------------|-----------------------------------------------------------------|-----------------------------------------------------------------------------------------------------------------------------------------------------------------------------------------------------------------------------------------------------------------------------------------------------------------------------------------------------------------------------------------------------------------------------------------------------------------------------------------------------------------------------------------------------------------------------------------------------------------------------------------------------------------------------------------------------------------------------------------------------------------------------------------------------------------------------------------------------------------------------------------------------------------------------------------------|
| <b>METAZOA</b>                    |                          |                                 |                              |                                                                 |                                                                                                                                                                                                                                                                                                                                                                                                                                                                                                                                                                                                                                                                                                                                                                                                                                                                                                                                               |
| <b>Chordata</b>                   |                          |                                 |                              |                                                                 |                                                                                                                                                                                                                                                                                                                                                                                                                                                                                                                                                                                                                                                                                                                                                                                                                                                                                                                                               |
| Cephalochordata                   |                          |                                 |                              |                                                                 |                                                                                                                                                                                                                                                                                                                                                                                                                                                                                                                                                                                                                                                                                                                                                                                                                                                                                                                                               |
| <i>Branchiostoma floridae</i> (1) | XP_002593885             | XM_002593839                    | NW_003101415                 | -                                                               | BRAFLDRAFT_214875<br>Length of predicted protein: 126 amino acids<br>Completeness: incomplete on the carboxy-terminal end. Has an annotated initiation methionine, but this may not be correct.<br>Sequence alignments suggest a close relationship to <i>B. floridae</i> DIA1Lb (data not shown).<br>EST data supports expression (93% identical to EST with GenBank accession number: FE571008). However, this is the same EST supporting the gene below ( <i>DIA1L-partial 2</i> ).                                                                                                                                                                                                                                                                                                                                                                                                                                                        |
| <i>Branchiostoma floridae</i> (2) | XP_002593886             | XM_002593840                    | NW_003101415                 | -                                                               | BRAFLDRAFT_161925<br>Length of predicted protein: 91 amino acids.<br>Completeness: Incomplete on both ends.<br>Sequence alignments suggest a close relationship to DIA1Lb and 'partial 1.'<br>EST data supports expression (93% identical to EST with GenBank accession number: FE571008). However, this is the same EST supporting the gene above.                                                                                                                                                                                                                                                                                                                                                                                                                                                                                                                                                                                           |
| <i>Branchiostoma floridae</i> (3) | XP_002586953             | XM_002586907                    | NW_003101317                 | -                                                               | BRAFLDRAFT_269049<br>Length of predicted protein: 230 amino acids.<br>Completeness: annotated as 'complete,' but appears to be missing N-terminal (5' coding) sequence.<br>Sequence alignments suggest a close relationship to DIA1Lb and 'partial-4' below.<br>Expression is supported by a single EST sequence (Genbank expression number: FE569795).                                                                                                                                                                                                                                                                                                                                                                                                                                                                                                                                                                                       |
| <i>Branchiostoma floridae</i> (4) | XP_002613084             | XM_002613038                    | NW_003101564                 | Yes (but <u>not</u> in DIA1-like region -see adjacent comments) | BRAFLDRAFT_125704<br>Length of predicted protein: 703 amino acids, annotated as 'complete.'<br>Only the <u>first exon</u> has similarity to <i>DIA1L</i> . In this gene annotation the first exon of DIA1L (encoding 180 amino acids only) has been 'tacked onto' the 5' end of a gene encoding a <i>B. floridae</i> <i>Notch</i> homologue. This most likely represents an incorrect gene annotation.<br>A portion of this sequence is identical to that of <i>B. floridae</i> <i>DIA1L-partial 3</i> (see above), and overlaps the relevant EST sequence (Genbank expression number: FE569795). This suggests these two sequences are incorrectly annotated alleles of the same gene. This is further supported by examination of the surrounding genes, which reveals reverse synteny with the 'partial-3' genomic region (data not shown).<br>Sequence alignments suggest a close relationship of this region to DIA1Lb (data not shown). |
| <i>Branchiostoma floridae</i> (5) | XP_002588671             | XM_002588625                    | NW_003101353                 | -                                                               | BRAFLDRAFT_255455<br>Length of predicted protein: 115 amino acids.<br>Completeness: Incomplete on both ends.<br>Currently annotated as being expressed, but this is not supported by current EST data.                                                                                                                                                                                                                                                                                                                                                                                                                                                                                                                                                                                                                                                                                                                                        |

<sup>a</sup>Homologues of *DIA1* are only present in the Metazoa and *DIA1IL* orthologues in they phylum Echinodermata and subphylum Cephalochordata.<sup>b</sup>A dash is used when an absence of introns was found in sequences, due to insufficient data to draw a definitive conclusion of lack in the full-length gene.
