# Supplementary material for: Characterization of the Deleted in Autism 1 Protein Family: Implications for Studying Cognitive Disorders
Source: PubMed Central journal article supplement (PMC3023760; doi:10.1371/journal.pone.0014547), 2011-01-19
Supplement: pone.0014547.s011.pdf [file pone.0014547.s011.pdf]

Fig. S1

```

      10      20      30      40      50      60
      |      |      |      |      |      |
DreriDIAIb  MLRFLPLKLGRLYRCLKLLFLLGLFVILLMNTNHLFASFQKNELTDRRFINLNKCPACFG
DreriDIAIa  MLRILSLKFGRVYRCGKFLFIVALFVILLMNTNHLFASFQRNELTDRRFIGLNKCPACFG
      ***:*.**:**:* **:*:*.:*****:*****:*****

      70      80      90      100     110     120
      |      |      |      |      |      |
DreriDIAIb  TSWCRKFMNGQISFETWGRLRFLDVFNVKNVFFAQYGEPEGTRRIVLKRLSGNQELADI
DreriDIAIa  TSWCRKFMNGQVTFEMWGRLRFLDFFNVKNVFFAQYGEPEGTRRVLKRLSGNQELAEI
      *****:.* *****.*****:*****:*****:*

      130     140     150     160     170     180
      |      |      |      |      |      |
DreriDIAIb  DQKICKRATGRPRCDLIQAMYKTEFARLNGDVRLLTPDVVEGWSDLVHCPSQRLLDRIVR
DreriDIAIa  DQKICKRATGRPRCDLIQSMYKTEFARLNGDVRLLTPEVVEGWSDLVHCPSQRLLDRVVR
      *****:*****:*****:*****:*****:*****

      190     200     210     220     230     240
      |      |      |      |      |      |
DreriDIAIb  RYAETKDSGSFLLKNLKDTERMQLLMTLAFNPEPLVLQSFPSDEGWPFAKYLGACGRMVA
DreriDIAIa  RYAETKDSGSFLLKNLKDTERMQLLMTLAFNPEPLVLQSFPSDEGWPFAKYLGACGRMVA
      *****:*****:*****:*****:*****:*****

      250     260     270     280     290     300
      |      |      |      |      |      |
DreriDIAIb  VNYVGEELWSFFNAPWEKRVDLAKQLMDIAEQLTNNDFDFALYLLDVSFDNFAVGPRDGK
DreriDIAIa  VNYVGEELWSFFNAPWEKRVDLAKQLMDIAEQLTNNDFDFALYLLDVSFDNFAVGPRDGK
      *****:*****:*****:*****:*****:*****

      310     320     330     340     350     360
      |      |      |      |      |      |
DreriDIAIb  VIVVDAENVVADKRLIKQNKPESYDVWYESRFEECDKEACLSFSKDMLCSRVTVDHNY
DreriDIAIa  VIVIDAENVIVDKRLVKQNKPESYDVWYESRYEECDKEACLSFSKDILCSRVTVDHNY
      **:***:*.**:**:* *****:*****:*****:*****:*****

      370     380     390     400     410     420
      |      |      |      |      |      |
DreriDIAIb  AICQNLLSRYATWRGSSGLLHDPPPHIAKDGQLEALLECANPKKRYGRFQAAKELRDY
DreriDIAIa  AVCQDLLSRFSSWRGSTGGLLHDPPPDVVKDGRLIALLDECTRFQKRYGRFQAAKELREF
      *:***:***:***:*****:*.**:**:* **:*:*.:*****:*****:*****:

      430
      |
DreriDIAIb  LTQLSGSAR---
DreriDIAIa  LTQLTQTSNADR
      ***: :.:.
```
