# Supplementary material for: Characterization of the Deleted in Autism 1 Protein Family: Implications for Studying Cognitive Disorders
Source: PubMed Central journal article supplement (PMC3023760; doi:10.1371/journal.pone.0014547), 2011-01-19
Supplement: pone.0014547.s012.pdf [file pone.0014547.s012.pdf]

Fig. S2

```

GaculDIA1 1 MDRFLPL--KLGRLYRCLKLLLVVGLFVILLMNHHS-----LFASFQKNELTDRRFINLN
OlatiDIA1 1 MDRFLPL--KLGRLYRCLKLLLVVGLFVILLMNTHN-----LFASFQKNELTDRRFINLN
TnigrDIA1 1 MDRFLPL--KLGRLYRCLKLLLVVGLFVILLMNTHN-----LFASFQKNELTDRRFINLN
TrubrDIA1 1 MDRFLPL--KLGRLYRCLKLLLVVGLFVILLMNTHN-----LFASFQKNELTDRRFINLN
DreriDIA1b 1 MDRFLPL--KLGRLYRCLKLLLVGLFVILLMNTHN-----LFASFQKNELTDRRFINLN
DreriDIA1a 1 MDRILSL--KFGRYRCGKFLFIVALFVILLMNTHN-----LFASFQKNELTDRRFIQLN
BtaurDIA1 1 MWRLVPP--KLGRLSRSLKLAALGSLLVLMVLHSPS-----LLASWQRNELADRRFLQLN
PpymDIA1 1 MWRLVPP--KLGRLSRSLKLAALGSLLVLMVLHSPS-----LLASWQRNELADRRFLQLN
CfamiDIA1 1 MWRLVPP--KLGRLSRSLKLAALGSLLVLMVLHSPS-----LLASWQRNELADRRFLQLN
PtrogDIA1 1 MWRLVPP--KLGRLSRSLKLAALGSLLVLMVLHSPS-----LLASWQRNELADRRFLQLN
TtrunDIA1 1 MWRLVPP--KLGRLSRSLKLAALGSLLVLMVLHSPS-----LLASWQRNELADRRFLQLN
HsapiDIA1 1 MWRLVPP--KLGRLSRSLKLAALGSLLVLMVLHSPS-----LLASWQRNELADRRFLQLN
MmulaDIA1 1 MWRLVPP--KLGRLSRSLKLAALGSLLVLMVLHSPS-----LLASWQRNELADRRFLQLN
PvampDIA1 1 MWRLVPP--KLGRLSRSLKLAALGSLLVLMVLHSPS-----LLASWQRNELADRRFLQLN
MmuscDIA1 1 MWRLVPL--KLGRLSRALKLAALGSLLVLMMLHSPS-----LLASWQRNELADRRFLQLN
RnorvDIA1 1 MWRLVPL--KLGRLSRALKLAALGSLLVLMMLHSPS-----LLASWQRNELADRRFLQLN
MdomeDIA1 1 MWRLVPP--KLGRLSRSLKLAALGSLLVLMVLHSPS-----LLASWQRNELADRRFLQLN
GgallDIA1 1 MLRLVSL--KLGRLYRYVKLAVLGLSAAAIVLNTHS-----LLASLQRNELADRRFLQLN
XtropDIA1 1 MLRLASL--KFGRLFRYAKVLFASLLVVMMLNTHS-----LLSSFQKNELTDRRFINLN
BflorDIA1 1 -MRLVRLR-QFRRFSGWRVRRRCGFFFFVFFYCF-----VFQPFSSYNQLDTDFLGED
SpurpDIA1 1 MRRYFNQFTNRFCTSTQQLWLVVLSMCLFVYYQ-----LYLHF TANHLENEYFTEAT
NvectDIA1 1 -MHFGGILRKRRIQRLVLLLVIIISFSDLLWLSYQDGRAIKWDFSSGHKLTFOEIGLN
NvitrDIA1 1 -----MLVTKASVSEFIALLLILGIYIN-----R----FNLKVAEITERY
AaegyDIA1 1 -----MSQ--HRIILTKLHVALFLWIVMKYQPE---ERASSLKSLVQQCQYDITI
CpipiDIA1 1 -----MSSGFORILVNHILALLFCVIFEFQPK---EPESLTELIVNQCBEYEQH
AgambDIA1 1 -----MQS----S-RLPYFVTLFIAVVLQYLPN---EKSTSKRPLENVCDYDRNI
DyakuDIA1 1 -----MHLSPGQLKVVILILALLQE---LQVKPQREVFQELFEKDLR
DerecDIA1 1 -----MHLSPGQLKVVILILALLQE---LQVKPQREVFQELFEKDLR
DmelaDIA1 1 -----MHLSHGQLKVVILILALLQE---LQVKPQREVFQELFEKDLR
DsechDIA1 1 -----MHLSYGQLKVVILILALLQE---LQVKTQREVFQELFEKDLR
DananDIA1 1 -----MHLMSGQLRIVLVLALLQD---LQVKPQKIDIFQEHFESDLR
DpersDIA1 1 -----MHLSPGHLRIVLILALLQD---LQVKPQKIDIFRAHLERDLQ
DpseuDIA1 1 -----MHLSPGHLRIVLILALLQD---LQVKPQKIDIFRAHLERDLQ
DwillDIA1 1 -----MHLLYGQLKVVILVLLALLQE---LDVRTQKIDIFRKHFNMDDL
CinteDIA1 1 MLLKMKRYLTVWENGKRYIVFIFLITLLEVMYHNRSQGSTRVMLEAKLLSDKWSATSP
consensus 1 m r l klgrl r lkll vg l villl t l asfqnel drrfi ln

```

```

GaculDIA1 54 KCP--ACFGT--SWCRKFMNGQVSFET-----WGRL-RLDVFNVKNVYFAQYGEPRE
OlatiDIA1 54 KCP--ACFGT--SWCRKFMNGQVSFET-----WGRL-RLDVFNVKNVYFAQYGEPRE
TnigrDIA1 54 KCP--ACFGT--SWCRKFMNGQVSFET-----WGRL-RLDVFNVKNVYFAQYGEPRE
TrubrDIA1 54 KCP--ACFGT--SWCRKFMNGQVSFET-----WGRL-RLDVFNVKNVYFAQYGEPRE
DreriDIA1b 54 KCP--ACFGT--SWCRKFMNGQVSFET-----WGRL-RLDVFNVKNVYFAQYGEPRE
DreriDIA1a 54 KCP--ACFGT--SWCRKFMNGQVTFEM-----WGRL-RLDFFNVKNVYFAQYGEPRE
BtaurDIA1 54 KCP--ACFGT--SWCRRFLNGQVVFEE-----WGRL-RLDFFLNKNVYFAQYGEPRE
PpymDIA1 54 KCP--ACFGT--SWCRRFLNGQVVFEE-----WGRL-RLDFFLNKNVYFAQYGEPRE
CfamiDIA1 54 KCP--ACFGT--SWCRRFLNGQVVFEE-----WGRL-RLDFFLNKNVYFAQYGEPRE
PtrogDIA1 54 KCP--ACFGT--SWCRRFLNGQVVFEE-----WGRL-RLDFFLNKNVYFAQYGEPRE
TtrunDIA1 54 KCP--ACFGT--SWCRRFLNGQVVFEE-----WGRL-RLDFFLNKNVYFAQYGEPRE
HsapiDIA1 54 KCP--ACFGT--SWCRRFLNGQVVFEE-----WGRL-RLDFFLNKNVYFAQYGEPRE
MmulaDIA1 54 KCP--ACFGT--SWCRRFLNGQVVFEE-----WGRL-RLDFFLNKNVYFAQYGEPRE
PvampDIA1 54 KCP--ACFGT--SWCRRFLNGQVVFEE-----WGRL-RLDFFLNKNVYFAQYGEPRE
MmuscDIA1 54 KCP--ACFGT--SWCRRFLNGQVGFET-----WGRL-RLDFFLNKNVYFAQYGEPRE
RnorvDIA1 54 KCP--ACFGT--SWCRRFLNGQVGFET-----WGRL-RLDFFLNKNVYFAQYGEPRE
MdomeDIA1 54 KCP--ACFGT--SWCRRFLNGQVAFEE-----WGRL-RLDFFLNKNVYFAQYGEPRE
GgallDIA1 54 KCP--ACFGT--SWCRKFLNGQLRLES-----WGRL-RLDFFNVKNVYFAQYGEPRE
XtropDIA1 54 KCP--ACFGT--SWCRKFMNGQLSFEG-----WGRL-RLDFFNVKNVYFAQYGEPRE
BflorDIA1 54 KCP--ACFGT--DLCEEFENGKILFKY-----SSRL-RLDIFNKNVYFATY----E
SpurpDIA1 56 KCP--ACFGT--SLCKRFSRGDYRFHS-----YSSI-RLFDYVNVKNVYFATYLD---
NvectDIA1 60 KCP--ACFGINLSICHKLLGGVTVKVS-----N---TPWSEERIKGVSYGLNG---
NvitrDIA1 39 KCP--ACFGD--SMCQVIDSNEISFEY-----TDFYSIFNNLFSVKNVYVYGRK----
AaegyDIA1 46 LCP--GCFPRP-VNCSFFENLKSIDS-----NELEFELLTHFNQHGVRYGTL
CpipiDIA1 48 LCP--ECFVSPVTNCGHLANFVTIDS-----SNPWNQLTCHYNPHGVSYG-LL
AgambDIA1 43 LCP--ECVSSG-LECNKFDLTLQD-----DNVFNININIFNSHTTRIGTIV
DyakuDIA1 39 LCP--NCFFGQRELCEEIFOKIAEPSD-----W---SKLLKAISLIVDRRAIVFLRFK
DerecDIA1 39 LCP--DCFVGQSELCVGFIFOKIAEPSD-----W---SKLLKAISLIVDRRAIVYFLRLK
DmelaDIA1 39 LCP--DCFVGQSEPCGEIFOKIAEPSD-----W---SRLVKAISLIVDRRAIVYFLRLK
DsechDIA1 39 LCP--DCFVGQKEQCGEIFOKIAEPSD-----W---SRLVKAISLIVDRRAIHYFLRLK
DananDIA1 39 LCP--ACFSAQREQCEEVFRAIPEPSD-----L---SKLWKAIVTLFDRREIIFWLEIG
DpersDIA1 39 LCP--ACFAGQRWQCEEIFEIAIPEPSD-----W---SKLLKGIALLIDRREIYFLQLN
DpseuDIA1 39 LCP--ACFAGQRWQCEEIFEIAIPEPSD-----W---SKLLKGIALLIDRREIYFLQLN
DwillDIA1 39 ECP--QCFLGQREQCEKFFDITIEPAK-----L---DRLWKDLTLVDPREIYWLELN
CinteDIA1 61 TCGNFSFCFGT--SLCKNRNRVGVSEIVPTLRSGWLSIYGLVLDLHRVKNVYTKLPSTLP
consensus 61 kCp aCfGt swCrkfmngqv fe wgrl rlld lnvknvyfaqygepre

```

GaculDIA1 102 GTRR-VVLKRLGNSQELAEIDQKICKRATGRPR-CDLIQAMYKTEFA-RINGDVRLLTPE  
OlatiDIA1 102 GTRR-VVLKRLGNSQELAEIDQKICKRATGRPR-CDLVQAMYKTEFA-RINGDVRLLTPE  
TnigrDIA1 102 GTRR-VVLKRLGNSQELADIDQKICKRATGRPR-CDLIQAMYKTEFA-RINGDVRLLTPE  
TrubrDIA1 102 GTRR-VVLKRLGNSQELADIDQKICKRATGRPR-CDLIQAMYKTEFA-RINGDVRLLTPE  
DreriDIA1b 102 GTRR-VVLKRLGNSQELAEIDQKICKRATGRPR-CDLIQAMYKTEFA-RINGDVRLLTPE  
DreriDIA1a 102 GTRR-VVLKRLGNSQELAEIDQKICKRATGRPR-CDLIQAMYKTEFA-RINGDVRLLTPE  
BtaurDIA1 102 GRRRVVLKRLGNSQELAQLDQSIKCRATGRPR-CDLQAMPRTTEFA-RINGDVRLLTPE  
PpygmDIA1 102 GRRRVVLKRLGNSQELAQLDQSIKCRATGRPR-CDLQAMPRTTEFA-RINGDVRLLTPE  
CfamiDIA1 102 GRRRVVLKRLGNSQELAQLDQSIKCRATGRPR-CDLQAMPRTTEFA-RINGDVRLLTPE  
PtrogDIA1 102 GRRRVVLKRLGNSQELAQLDQSIKCRATGRPR-CDLQAMPRTTEFA-RINGDVRLLTPE  
TtrunDIA1 102 GRRRVVLKRLGNSQELAQLDQSIKCRATGRPR-CDLQAMPRTTEFA-RINGDVRLLTPE  
HsapiDIA1 102 GRRRVVLKRLGNSQELAQLDQSIKCRATGRPR-CDLQAMPRTTEFA-RINGDVRLLTPE  
MmulaDIA1 102 GRRRVVLKRLGNSQELAQLDQSIKCRATGRPR-CDLQAMPRTTEFA-RINGDVRLLTPE  
PvampDIA1 102 GRRRVVLKRLGNSQELAQLDQSIKCRATGRPR-CDLQAMPRTTEFA-RINGDVRLLTPE  
MmuscDIA1 102 GRRRVVLKRLGNSQELAQLDQSIKCRATGRPR-CDLQAMPRTTEFA-RINGDVRLLTPE  
RnorvDIA1 102 GRRRVVLKRLGNSQELAQLDQSIKCRATGRPR-CDLQAMPRTTEFA-RINGDVRLLTPE  
MdomeDIA1 102 GRRRVVLKRLGNSQELAQLDQSIKCRATGRPR-CDLQAMPRTTEFA-RINGDVRLLTPE  
GgallDIA1 102 GSRR-VVLKRLGSAQELADIDAKICRRATGRGR-CDLQALHATEFA-SINGDVRLLTPE  
XtropDIA1 102 GSRR-VVLKRLGNSHELSELDQRIKCRATGRPR-CDLVQAMYKTEFA-RINGDVRLLTPE  
BflorDIA1 98 GMEV--ALKRLGHNSSEFDQLDRWICETKEGEQ-CHIPSVTYYSNFS-RVIYEG--LSPK  
SpurDIA1 101 --QKPVVVKLGHNSSEHNQFDKDLCTNAESGLRGCDVSOQYKSKLS-DIMYAEF--LEEK  
NvectDIA1 103 AVKQRVVLKTLGTSSELTAFDNEICRGVGVKDSN-CKLSQEAWSDV-LVPPKQO-----  
NvitrDIA1 84 --DKKVIKMLAQESSELKTFDEMICSDELHELQYSESRSKQDSKTN-FYKLVESELANV  
AaegyDIA1 91 GSEQRVVKLNLNKEHGEVELISSICNDLKIYR-NQRLRNKEPYLR-----VLRQVVL---  
CpipiDIA1 93 GSGQKVVKTLNKNRAVEALRDVACDELGLTQSNCKFKSDENTLK-----VLRKVVL---  
AgambDIA1 88 QENKLAVMKHLNRDNTTEKLLCEYCDAYSLTKQNCRWACHDGSVDRA-KEFITTSIL---  
DyakuDIA1 87 DQDQ----VVAKRKIIDAQNOQ-IKDVKKAF-----YE-----  
DerecDIA1 87 DQAQ----VVAKRKIIDARNHK-AENVEKAF-----YE-----  
DmelaDIA1 87 DRDQEV-Q-LVAKRKIIDAQSNQ-IKNVKKDF-----YE-----  
DsechDIA1 87 DQDQAV-Q-LVAKRKIINAHSYQ-MKNVKRAF-----YE-----  
DananDIA1 87 PSQEKSSQ-LLAKRKSIVASHQS-LSSLQEEF-----LN-----  
DpersDIA1 87 ERHQAA-Q-LVAKRDAIGGHSYRNMGI LREAF-----LE-----  
DpseudDIA1 87 ERHQAA-Q-LVAKRDAIGGHSYRNMGI LGEAF-----LE-----  
DwillDIA1 87 ENREN-VK-CLAKRMTRKISKD-----  
CinteDIA1 119 CNGETCSVQIETSVLSGNNVNWIKCDKFKKPTN-CDTGKVFKSWRAMNKITSAGRLDPE  
consensus 121 g rr vvlkrlgnsrela idq ickratgrpr cdliqam ktefa ringdvrltpe

GaculDIA1 159 VVEGWSDLVHCPQSRLLDRLVRRYAETKDSGSFLLKLNKDKTERMQLLMTLAFNPEPLVLQ  
OlatiDIA1 159 VVEGWSDLVHCPQSRLLDRLVRRYAETKDSGSFLLKLNKDKTERMQLLMTLAFNPEPLVLQ  
TnigrDIA1 159 VVEGWSDLVHCPQSRLLDRLVRRYAETKDSGSFLLKLNKDKTERMQLLMTLAFNPEPLVLQ  
TrubrDIA1 159 VVEGWSDLVHCPQSRLLDRLVRRYAETKDSGSFLLKLNKDKTERMQLLMTLAFNPEPLVLQ  
DreriDIA1b 159 VVEGWSDLVHCPQSRLLDRLVRRYAETKDSGSFLLKLNKDKTERMQLLMTLAFNPEPLVLQ  
DreriDIA1a 159 VVEGWSDLVHCPQSRLLDRLVRRYAETKDSGSFLLKLNKDKTERMQLLMTLAFNPEPLVLQ  
BtaurDIA1 160 AVEGWSDLVHCPQSRLLDRLVRRYAETKDSGSFLLRNLKDSERMQLLMTLAFNPEPLVLQ  
PpygmDIA1 160 AVEGWSDLVHCPQSRLLDRLVRRYAETKDSGSFLLRNLKDSERMQLLMTLAFNPEPLVLQ  
CfamiDIA1 160 AVEGWSDLVHCPQSRLLDRLVRRYAETKDSGSFLLRNLKDSERMQLLMTLAFNPEPLVLQ  
PtrogDIA1 160 AVEGWSDLVHCPQSRLLDRLVRRYAETKDSGSFLLRNLKDSERMQLLMTLAFNPEPLVLQ  
TtrunDIA1 160 AVEGWSDLVHCPQSRLLDRLVRRYAETKDSGSFLLRNLKDSERMQLLMTLAFNPEPLVLQ  
HsapiDIA1 160 AVEGWSDLVHCPQSRLLDRLVRRYAETKDSGSFLLRNLKDSERMQLLMTLAFNPEPLVLQ  
MmulaDIA1 160 AVEGWSDLVHCPQSRLLDRLVRRYAETKDSGSFLLRNLKDSERMQLLMTLAFNPEPLVLQ  
PvampDIA1 160 AVEGWSDLVHCPQSRLLDRLVRRYAETKDSGSFLLRNLKDSERMQLLMTLAFNPEPLVLQ  
MmuscDIA1 160 AVEGWSDLVHCPQSRLLDRLVRRYAETKDSGSFLLRNLKDSERMQLLMTLAFNPEPLVLQ  
RnorvDIA1 160 AVEGWSDLVHCPQSRLLDRLVRRYAETKDSGSFLLRNLKDSERMQLLMTLAFNPEPLVLQ  
MdomeDIA1 160 AVEGWSDLVHCPQSRLLDRLVRRYAETKDSGSFLLRNLKDSERMQLLMTLAFNPEPLVLQ  
GgallDIA1 159 AVEGWSDLVHCPQSRLLDRLVRRYAETKDSGSFLLRNLKDSERMQLLMTLAFNPEPLVLQ  
XtropDIA1 159 VVEGWSDLVHCPQSRLLDRLVRRYAETKDSGSFLLRNLKDKTERMQLLMTLAFNPEPLVLQ  
BflorDIA1 152 SEGDMSDVRCPQSRLLDRLVLEKFAEHLGKET---EELSYQEKLHFLSTLKFNPPEPLMLQ  
SpurDIA1 157 DVMGLSDIVRCPQSRLLDRLVDTFGERQFDKS-----LARDHKLMLATTLAFNPEPLILQ  
NvectDIA1 156 --DAVRKYFDCPSTRLEKIESVYQETPGQLS-----LVETIHLTGLHLNPEPLLLQ  
NvitrDIA1 141 GGFINNKMLRCPPTTTKLEKLFVNVKFSHAEN-----EDYFKYLWSTIKINPEPLILQ  
AaegyDIA1 142 NDNQLEGAFLCPLMDE--EALKRFLFEIDEND-----LNKILLMRINAQPLLLK  
CpipiDIA1 145 -EQELEGCHICPSKDE--KALNRLNEVVGTE-----LLQLLKLKVNQPLLLK  
AgambDIA1 144 DSARVEGCHFCPATNNR-QSLQRFSLSEFSDTD-----NELWNLAVRTNVEPLLIK  
DyakuDIA1 115 LGERPGGFHLCRTPSRKP-RFVSYLEQRGHA-----SASVWFYMMHYVSPLLMQ  
DerecDIA1 115 QEBQPPGGFHLCRTPSRKP-RFVSYLEQRGHA-----SASVWFYMMHYVSPLLMQ  
DmelaDIA1 118 LBERPGGFHLCRTLAREP-RFVSYLEQRGHA-----AASVWFYMMHYVSPLLMQ  
DsechDIA1 118 LBERPGGFHLCRTLAREP-RFVSYLEQRGHVY-----GSTSVWFYMMHYVSPLLMQ  
DananDIA1 119 LBERPGGFHLCRTAQKSS-PFINYLNRQGYD-----SSSIYFYMLHNSPLLMQ  
DpersDIA1 119 MBERPGGFQLCRSGFRTP-RFVSYLEQRGHE-----AATIWFYMMHSITPLLMQ  
DpseudDIA1 119 MBERPGGFQLCRSGFRTP-RFVSYLEQRGHE-----AATIWFYMMHSITPLLMQ  
DwillDIA1 108 LHFNPPGGFQMCORNSTR---FLAYLEERGYL-----PATIGYYTHHSISPLLMQ  
CinteDIA1 178 LKDI SPPVQCPSTRADRI VRRVANKQGGVLLR--DLSYTEKRLFFCTKMSGSSVVS  
consensus 181 vegwsdlvhCpsqrlldrvvrryaetkdsGSfllknkdktermqlllmtlafnpeplvlq

|            |     |          |         |            |            |        |       |        |        |         |          |
|------------|-----|----------|---------|------------|------------|--------|-------|--------|--------|---------|----------|
| GaculDIA1  | 219 | SFP----  | SDEGWPF | AKYLGACGRM | VAVN--     | YVGEEL | WSFY  | NAPWEK | RVDLAR | QQLMD   | IAEQ     |
| OlatiDIA1  | 219 | SFP----  | SDEGWPF | AKYLGACGRM | VAVN--     | YVGEEL | WNFY  | NAPWEK | RVDLAR | QQLMD   | IAEQ     |
| TnigrDIA1  | 219 | SFP----  | SDEGWPF | AKYLGACGRV | VAVN--     | YVGEEL | WSFY  | NAPWEK | RVDLAR | QQLMD   | IAEQ     |
| TrubrDIA1  | 219 | SFP----  | SDEGWPF | AKYLGACGRV | VAVN--     | YVGEEL | WSFY  | NAPWEK | RVDLAR | QQLMD   | IAEQ     |
| DreridIA1b | 219 | SFP----  | SDEGWPF | AKYLGACGRM | VAVN--     | YVGEEL | WSFF  | NAPWEK | RVDLAR | QQLMD   | IAEQ     |
| DreridIA1a | 219 | SFP----  | SDEGWPF | AKYLGACGRM | VAVN--     | YVGEEL | WSFY  | NAPWEK | RVDLAR | QQLMD   | IAEQ     |
| BtaurDIA1  | 220 | SFP----  | SDEGWPF | AKYLGACGRM | VAVN--     | YVGEEL | WSFY  | NAPWEK | RVDLAR | QQLME   | IAEQ     |
| PpygmDIA1  | 220 | SFP----  | SDEGWPF | AKYLGACGRM | VAVN--     | YVGEEL | WSFY  | NAPWEK | RVDLAR | QQLME   | IAEQ     |
| CfamiDIA1  | 220 | SFP----  | SDEGWPF | AKYLGACGRM | VAVN--     | YVGEEL | WSFY  | NAPWEK | RVDLAR | QQLME   | IAEQ     |
| PtrogDIA1  | 220 | SFP----  | SDEGWPF | AKYLGACGRM | VAVN--     | YVGEEL | WSFY  | NAPWEK | RVDLAR | QQLME   | IAEQ     |
| TtrunDIA1  | 220 | SFP----  | SDEGWPF | AKYLGACGRM | VAVN--     | YVGEEL | WSFY  | NAPWEK | RVDLAR | QQLME   | IAEQ     |
| HsapiDIA1  | 220 | SFP----  | SDEGWPF | AKYLGACGRM | VAVN--     | YVGEEL | WSFY  | NAPWEK | RVDLAR | QQLME   | IAEQ     |
| MmulaDIA1  | 220 | SFP----  | SDEGWPF | AKYLGACGRM | VAVN--     | YVGEEL | WSFY  | NAPWEK | RVDLAR | QQLME   | IAEQ     |
| PvampDIA1  | 220 | SFP----  | SDEGWPF | AKYLGACGRM | VAVN--     | YVGEEL | WSFF  | NAPWEK | RVDLAR | QQLME   | IAEQ     |
| MmuscDIA1  | 220 | SFP----  | SDEGWPF | AKYLGACGRM | VAVN--     | YVGEEL | WSFY  | NAPWEK | RVDLAR | QQLME   | IAEQ     |
| RnorvDIA1  | 220 | SFP----  | SDEGWPF | AKYLGACGRM | VAVN--     | YVGEEL | WSFY  | NAPWEK | RVDLAR | QQLME   | IAEQ     |
| MdomeDIA1  | 220 | SFP----  | SDEGWPF | AKYLGACGRM | VAVN--     | YVGEEL | WSFY  | NAPWEK | RVDLAR | QQLME   | IAEQ     |
| GgallDIA1  | 219 | SFP----  | SDEGWPF | AKYLGACGRM | VAVN--     | YVGEEL | WSFY  | NAPWEK | RVDLAR | QQLME   | IAEQ     |
| XtropDIA1  | 219 | SFP----  | SDEGWPF | AKYLGACGRM | VAVN--     | YVGEEL | WSFY  | NAPWEK | RVDLAR | QQLME   | IAEQ     |
| BflorDIA1  | 209 | TFP----  | ITEGWPF | PFYFGACGR  | LTIVC-     | KCDKTL | ASYS  | SAPWL  | KRVLEL | SLOMK   | IAEYL    |
| SpurpDIA1  | 212 | AFP----  | NRKGWPF | PAYMGACGR  | FTVQE-     | YSGHSL | SYFY  | KFKG   | GVRAAL | AVQAL   | KIAEQ    |
| NvectDIA1  | 208 | IFR----  | QTEGWPF | PREYGVCGR  | IMVVE-     | DSGPPH | SSFL  | EESSW  | DVRAQ  | IAVNL   | ITLAHQ   |
| NvitrDIA1  | 194 | ILP----  | AKEGWPT | KYFGACGR   | LIVEE-     | YIGLPL | SSFI  | DEBP   | WIRRAK | IASSL   | IQAADL   |
| AeegyDIA1  | 189 | LL-----  | QRNFVVP | KLIFQGGFT  | LIVES-     | YEGEAL | AKYY  | DRPL   | NVRL   | LITANEL | IKASLN   |
| CpipiDIA1  | 191 | LF-----  | DGRGFVP | PKVIFQGGF  | QLFES-     | FDGDAL | VNFY  | DSSLN  | IRLRL  | AKELI   | QASFLF   |
| AgambDIA1  | 194 | LLTVNYHD | PPLYVVP | KLLHTFGFS  | LIET-      | YEGKTL | EHYY  | DFPF   | VTRMR  | IAAEL   | IACFKF   |
| DyakuDIA1  | 163 | EL-----  | YLQGFVP | PTYASCGLT  | HFQS-      | YAGRTL | TNYFE | EEED   | LRLV   | LALQL   | QLSLKL   |
| DerecDIA1  | 164 | EL-----  | HLQGFVP | PTYASCGLT  | HFQA-      | YAGRTL | TNYFE | EEED   | LRLV   | LALQL   | QLSLKL   |
| DmelaDIA1  | 166 | EL-----  | HLQGFVP | PTYASCGLT  | HFQS-      | NAGRTL | LAHYV | DAEGL  | RVEL   | LALQL   | QLSLKL   |
| DsechDIA1  | 168 | EL-----  | HLQGFVP | PTYASCGLT  | HFQS-      | YAGRTL | LAHYV | NAEGL  | RLEL   | LALQL   | QLSLKL   |
| DananDIA1  | 167 | EL-----  | QNLDFVP | PNTYAI     | CGLTHFQA-  | YAGRTL | NHYTE | AAED   | LRRE   | IARQL   | IHL      |
| DpersDIA1  | 167 | EL-----  | FLRGFVP | PSYAACGLT  | HFQA-      | YAGRTL | VHYAT | AGENL  | RLEMA  | RQLL    | QLSLKL   |
| DpseuDIA1  | 167 | EL-----  | FLRGFVP | PSYAACGLT  | HFQA-      | YAGRTL | VHYAT | AGENL  | RLEMA  | RQLL    | QLSLKL   |
| DwillDIA1  | 153 | EL-----  | WIMDFVP | RSFVACG    | STLFA-     | YAGSTL | SNYLK | APIDL  | RLEMA  | QQLI    | QLALKL   |
| CinteDIA1  | 236 | MFP----  | PYEGWLF | QSTVGS     | CGALMVHGRS | IVTSLM | ELYL  | DAPWK  | VRLD   | VAIQL   | LDLDAEHF |
| consensus  | 241 | sfp      | sdegw   | pfakylgac  | grmvavn    | yvgeel | wsyyn | apwek  | rvdla  | qlmdia  | aeql     |

|            |     |      |         |         |        |           |            |      |        |       |       |                 |                  |              |         |       |     |    |    |   |
|------------|-----|------|---------|---------|--------|-----------|------------|------|--------|-------|-------|-----------------|------------------|--------------|---------|-------|-----|----|----|---|
| GaculDIA1  | 274 | TNND | DFALYLL | DVSFDNF | AVGPRD | GK----    | VIIVDA     | ENVL | VADKRL | IKONK | PESE  | YDVWY           |                  |              |         |       |     |    |    |   |
| OlatiDIA1  | 274 | TNND | DFALYLL | DVSFDNF | AVGPRD | GK----    | VIIVDA     | ENVL | VADKRL | IKONK | PESE  | YDVWY           |                  |              |         |       |     |    |    |   |
| TnigrDIA1  | 274 | TNND | DFALYLL | DVSFDNF | AVGPRD | GK----    | VIIVDA     | ENVL | VADKRL | IKONK | PENF  | YDVWY           |                  |              |         |       |     |    |    |   |
| TrubrDIA1  | 274 | TNND | DFALYLL | DVSFDNF | AVGPRD | GK----    | VIIVDA     | ENVL | VADKRL | IKONK | PENY  | YDVWY           |                  |              |         |       |     |    |    |   |
| DreridIA1b | 274 | TNND | DFALYLL | DVSFDNF | AVGPRD | GK----    | VIIVDA     | ENVL | VADKRL | IKONK | PESE  | YDVWY           |                  |              |         |       |     |    |    |   |
| DreridIA1a | 274 | TNND | DFALYLL | DVSFDNF | AVGPRD | GK----    | VIIVDA     | ENVI | VADKRL | IKONK | PESE  | YDVWY           |                  |              |         |       |     |    |    |   |
| BtaurDIA1  | 275 | TNND | DFALYLL | DVSFDNF | AVGPRD | GK----    | VIIVDA     | ENVL | VADKRL | IKONK | PENW  | YDVWY           |                  |              |         |       |     |    |    |   |
| PpygmDIA1  | 275 | TNND | DFALYLL | DVSFDNF | AVGPRD | GK----    | VIIVDA     | ENVL | VADKRL | IKONK | PENW  | YDVWY           |                  |              |         |       |     |    |    |   |
| CfamiDIA1  | 275 | TNND | DFALYLL | DVSFDNF | AVGPRD | GK----    | VIIVDA     | ENVL | VADKRL | IKONK | PENW  | YDVWY           |                  |              |         |       |     |    |    |   |
| PtrogDIA1  | 275 | TNND | DFALYLL | DVSFDNF | AVGPRD | GK----    | VIIVDA     | ENVL | VADKRL | IKONK | PENW  | YDVWY           |                  |              |         |       |     |    |    |   |
| TtrunDIA1  | 275 | TNND | DFALYLL | DVSFDNF | AVGPRD | GK----    | VIIVDA     | ENVL | VADKRL | IKONK | PENW  | YDVWY           |                  |              |         |       |     |    |    |   |
| HsapiDIA1  | 275 | TNND | DFALYLL | DVSFDNF | AVGPRD | GK----    | VIIVDA     | ENVL | VADKRL | IKONK | PENW  | YDVWY           |                  |              |         |       |     |    |    |   |
| MmulaDIA1  | 275 | TNND | DFALYLL | DVSFDNF | AVGPRD | GK----    | VIIVDA     | ENVL | VADKRL | IKONK | PENW  | YDVWY           |                  |              |         |       |     |    |    |   |
| PvampDIA1  | 275 | TNND | DFALYLL | DVSFDNF | AVGPRD | GK----    | VIIVDA     | ENVL | VADKRL | IKONK | PENW  | YDVWY           |                  |              |         |       |     |    |    |   |
| MmuscDIA1  | 275 | TNND | DFALYLL | DVSFDNF | AVGPRD | GK----    | VIIVDA     | ENVL | VADKRL | IKONK | PENW  | YDVWY           |                  |              |         |       |     |    |    |   |
| RnorvDIA1  | 275 | TNND | DFALYLL | DVSFDNF | AVGPRD | GK----    | VIIVDA     | ENVL | VADKRL | IKONK | PENW  | YDVWY           |                  |              |         |       |     |    |    |   |
| MdomeDIA1  | 275 | TNND | DFALYLL | DVSFDNF | AVGPRD | GK----    | VIIVDA     | ENVL | VADKRL | IKONK | PENW  | YDVWY           |                  |              |         |       |     |    |    |   |
| GgallDIA1  | 274 | TNND | DFALYLL | DVSFDNF | AVGPRD | GK----    | VIIVDA     | ENVL | VADKRL | IKONK | PENW  | YDVWY           |                  |              |         |       |     |    |    |   |
| XtropDIA1  | 274 | TNND | DFALYLL | DVSFDNF | AVGPRD | GK----    | VIIVDA     | ENVL | VADKRL | IKONK | PENW  | YDVWY           |                  |              |         |       |     |    |    |   |
| BflorDIA1  | 264 | TNNE | ADFLYL  | TDTSY   | ENFV   | GVTSDGN   | ----       | LFV  | IDVENV | IVV   | DKQIK | KADKPNWEARY     |                  |              |         |       |     |    |    |   |
| SpurpDIA1  | 267 | SEN  | RDFALY  | LLTDV   | SEDN   | LAVND-NGE | ----       | VLV  | IDAENI | IVV   | DRKKI | KEDANPGWVVKH    |                  |              |         |       |     |    |    |   |
| NvectDIA1  | 263 | SSAL | DDWALY  | IADP    | APGNF  | GVSD-SGK  | ----       | VTLL | DLLEHL | VVVDL | SEVQ  | MEEAN----       |                  |              |         |       |     |    |    |   |
| NvitrDIA1  | 249 | MSKN | SEFA    | YLTDIS  | MNIA   | VANN-EDK  | ----       | AIF  | VDL    | ENIIT | VEK   | NPPEKALVG-IESWN |                  |              |         |       |     |    |    |   |
| AeegyDIA1  | 243 | TEG  | VDNFR   | EYLT    | DISP   | NIIV      | SMSSEE-EIK | VTF  | VDL    | NNVI  | ILDS  | SKRLKP-SKQKHVH  |                  |              |         |       |     |    |    |   |
| CpipiDIA1  | 245 | TEG  | VNGFR   | EYLT    | DISP   | NIIV      | QAQPSG-SFQ | VST  | IDL    | DNVI  | ILDS  | SQSKLDRRSKARNIH |                  |              |         |       |     |    |    |   |
| AgambDIA1  | 253 | TEGI | HGFR    | VFLTD   | INP    | DNVV      | NLKN       | DNKQ | VYVSI  | VDL   | DNVI  | ILDS            | SWAEVFLT-KNTHHHV |              |         |       |     |    |    |   |
| DyakuDIA1  | 217 | TFG  | FSDFR   | MLTDF   | TGDN   | FAYDEHTTK | ----       | VYL  | IDL    | DSV   | VLV   | VD----          | ASSATGQAEKYE     |              |         |       |     |    |    |   |
| DerecDIA1  | 218 | TFG  | FSDFR   | MLTDF   | TGDN   | FAYDEDSKR | ----       | VYL  | IDL    | DSV   | VLV   | VD----          | ASSAAGQAEKYV     |              |         |       |     |    |    |   |
| DmelaDIA1  | 220 | TFG  | FADFR   | MLTDF   | TADN   | LAYDEDTKK | ----       | VYL  | IDL    | DSV   | VLV   | VD----          | ASFAAGHAEKYE     |              |         |       |     |    |    |   |
| DsechDIA1  | 222 | TFG  | FADFR   | MLTDF   | TADN   | LAYDEETKK | ----       | VYL  | IDL    | DSV   | VLV   | VD----          | ASSMAGQAEKYE     |              |         |       |     |    |    |   |
| DananDIA1  | 221 | TFG  | FADFR   | MLTDF   | TSDN   | LTFDEDTRE | ----       | VLL  | IDL    | DSV   | V     | MVD----         | AASTSGQAEKYE     |              |         |       |     |    |    |   |
| DpersDIA1  | 221 | TFG  | FADFR   | MLTDF   | TADN   | LAFDEASQS | ----       | VIL  | IDL    | DSV   | V     | V               | VD----           | AAVPLGDAQKYE |         |       |     |    |    |   |
| DpseuDIA1  | 221 | TFG  | FADFR   | MLTDF   | TADN   | LAFDEASQS | ----       | VIL  | IDL    | DSV   | V     | V               | VD----           | AAVPLGDAQKYE |         |       |     |    |    |   |
| DwillDIA1  | 207 | SAG  | FKGFR   | YLTDF   | TADN   | FAYNEANGT | ----       | VLL  | IDM    | DTM   | V     | LVES            | ND               | EASES        | QLSKKYK |       |     |    |    |   |
| CinteDIA1  | 292 | TYND | LNYM    | FALH    | RLLTP  | RDIG      | SD-TGK     | ---- | LR     | RK    | ADNV  | IL              | IDNN             | --SK         | NDKGL   | YEVRY |     |    |    |   |
| consensus  | 301 | tnn  | dfal    | yll     | dvsf   | dnfavg    | prdgk      |      | viv    | daen  | vl    | v               | adk              | rlik         | q       | kn    | pen | fd | vw | y |

GaculDIA1 330 ESRFEECD--REACLSFSKESLCSRVTVDHNYAVCQNLLSRYATWRGTT---GGLLHDP  
 OlatiDIA1 330 ESRFEECD--REACLSFSKDSLCSRVTVDHNYAVCQNLLSRYATWRGTT---GGLLHDP  
 TnigrDIA1 330 ESRFEECD--REACLSFSKDSLCSRVTVDHNYAVCQNLLSRYATWRGTT---GGLLHDP  
 TrubrDIA1 330 ESRFEECD--REACLSFSKDSLCSRVTVDHNYAVCQNLLSRYATWRGTT---GGLLHDP  
 DreriDIA1b 330 ESRFEECD--KEACLSFSKDLCSRVTVDHNYAVCQNLLSRYATWRGSS---GGLLHDP  
 DreriDIA1a 330 ESRYEECD--KEACLSFSKDLCSRVTVDHNYAVCQDLLSRFSSWRGST---GGLLHDP  
 BtaurDIA1 331 ESKFDDCD--KEACLSFSKEILCARATVDHNYAVCQNLLSRHATWRGTS---GGLLHDP  
 PpymDIA1 331 ESKFDDCD--KEACLSFSKEILCARATVDHNYAVCQNLLSRHATWRGTS---GGLLHDP  
 CfamiDIA1 331 ESKFDDCD--KEACLSFSKEILCARATVDHNYAVCQNLLSRHATWRGTS---GGLLHDP  
 PtrogDIA1 331 ESKFDDCD--KEACLSFSKEILCARATVDHNYAVCQNLLSRHATWRGTS---GGLLHDP  
 TtrunDIA1 331 ESKFDDCD--KEACLSFSKEILCARATVDHNYAVCQNLLSRHATWRGTS---GGLLHDP  
 HsapiDIA1 331 ESKFDDCD--KEACLSFSKEILCARATVDHNYAVCQNLLSRHATWRGTS---GGLLHDP  
 MmulaDIA1 331 ESKFDDCD--KEACLSFSKEILCARATVDHNYAVCQNLLSRHATWRGTS---GGLLHDP  
 PvampDIA1 331 ESKFDDCD--KEACLSFSKEILCARVTVDHNYAVCQNLLSRHATWRGTS---GGLLHDP  
 MmuscDIA1 331 ESKFDDCD--KEACLSFSKEILCARVTVDHNYAVCQNLLSRHATWRGTS---GGLLHDP  
 RnorvDIA1 331 ESKFDDCD--KEACLSFSKEILCARVTVDHNYAVCQNLLSRHATWRGTS---GGLLHDP  
 MdomeDIA1 331 ESKFDDCD--KEACLSFSKEILCSRATVDHNYAVCQNLLSRHATWRGTS---GGLLHDP  
 GgallDIA1 330 ESKFDDCD--KEACLSFSKEILCARVTVDHNYAVCQNLLSRHATWRGTS---GGLLHDP  
 XtropDIA1 330 ESKFDDCD--KEACLSFSKEILCSRATVDHNYAVCQNLLSRHATWRGTS---GGLLHDP  
 BflorDIA1 319 QSHFDECPG--MSNCLSFVDSALCRYLHTDHNYAVCRNMLSEYASEMGKP---GGLLHDP  
 SpurpDIA1 322 QSEHEGCGS--RRECIMFSHTDLONHYSDHNYAVCQGLFGKDSPHG--D---GGLLHDI  
 NvectDIA1 313 KKPSPDCS--QPDCLSFSPSDMCGSGSRDHNYAVCQGVLAGSSRRQ-----GGLLHNP  
 NvitrDIA1 303 EYITNAVLDLDCQDFVFSFNDLCSHKVSDHNFYATCQHILQALGAVFHN---QGLLHDP  
 AegyDIA1 301 SRIDCGC-----FAYIQEDLCVHQISDINLFAVCQLLENLNGDSKRG-----FLHSL  
 CpipiDIA1 304 SRIPCDGC-----FAYVQEDLCSYQHSINQFATCOLLYENLNGDREGG-----FLHIQ  
 AgambDIA1 312 SKIECNGC-----FAYVQEDVCRYQNSDLNLEATCOLLENLNGHYAKG-----LLHYD  
 DyakuDIA1 269 P-LPGE-----FTFDVSAFCSGHQLDANIYQACLLLRDYLLKLNLDN-----GGLLHDP  
 DerecDIA1 270 P-LPGE-----FTFDVSAFCSGHQLDANIYQACLLLRDFLLKLNLDN-----GGLLHDP  
 DmelaDIA1 272 P-LTGE-----FTFDVSAFCSGHQLDANIYQACLLLRDYLLKLNLDN-----GGLLHDP  
 DsechDIA1 274 P-LAGE-----FTFDVSAFCSGHQLDANIYQACLLLRDSLLKLNLDN-----GGLLHDP  
 DananDIA1 273 P-LPGE-----FTFDVSAFCSGRQLDANVYQACLLLRDFLLKDLNDN-----GGLLHDP  
 DpersDIA1 273 P-LPGD-----FTFDVKSFCGGQQLDANVYQACLLLKDFLLRDLAN-----GGLLHDP  
 DpseuDIA1 273 P-LPGD-----FTFDVKSFCGGQQLDANVYQACLLLKDFLLRDLAN-----GGLLHDP  
 DwillDIA1 263 P-FPGE-----FTYDVNAFCQDNQDLANIYQVCLLLLRDQLLPDVKN-----GGLLHDP  
 CinteDIA1 345 K--QEK-----VDITEENLDCDHSNDVNYVYVTCRHFLGGTWEKRGKGYKPGGLLHDP  
 consensus 361 esrfedcd reacclsfske lC r tvDhNyyavCqnllsr atwrgtt gllhdp

GaculDIA1 385 PAHIAK--DGQLTLLDECT-----RPKKRYGRFQAAKELREYLTQLAAASSSATAR--  
 OlatiDIA1 385 PAHIAK--DGQLEALLDECT-----RPKKRYGRFQAAKELREYLTQLAAASSSATSR--  
 TnigrDIA1 385 PAHIAK--DGQLEALLDECT-----KPKKRYGRFQAAKELREYLTQLAAASSSLSVSAR--  
 TrubrDIA1 385 PAHIAK--DGQLEALLDECT-----KPKKRYGRFQAAKELREYLTQLAAASSSLSVSAR--  
 DreriDIA1b 385 PPHIAK--DGQLEALLDECA-----NPKKRYGRFQAAKELREYLTQLSGSAR--  
 DreriDIA1a 385 PPDVVK--DGRLEALLDECT-----RPKKRYGRFQAAKELREYLTQLTQTSNADR----  
 BtaurDIA1 386 PSEIAK--DGRLEALLDECA-----NPKKRYGRFQAAKELREYLAQLSNNVR-----  
 PpymDIA1 386 PSEIAK--DGRLEALLDECA-----NPKKRYGRFQAAKELREYLAQLSNNVR-----  
 CfamiDIA1 386 PSEIAK--DGRLEALLDECA-----NPKKRYGRFQAAKELREYLAQLSNNVR-----  
 PtrogDIA1 386 PSEIAK--DGRLEALLDECA-----NPKKRYGRFQAAKELREYLAQLSNNVR-----  
 TtrunDIA1 386 PSEIAK--DGRLEALLDECA-----NPKKRYGRFQAAKELREYLAQLSNNVR-----  
 HsapiDIA1 386 PSEIAK--DGRLEALLDECA-----NPKKRYGRFQAAKELREYLAQLSNNVR-----  
 MmulaDIA1 386 PSEIAK--DGRLEALLDECA-----NPKKRYGRFQAAKELREYLAQLSNNVR-----  
 PvampDIA1 386 PSEIAK--DGRLEALLDECA-----NPKKRYGRFQAAKELREYLAQLSNNVR-----  
 MmuscDIA1 386 PSEIAK--DGRLEALLDECT-----NPKKRYGRFQAAKELRGYLAQLSHNVR-----  
 RnorvDIA1 386 PSEIAK--DGRLEALLDECT-----NPKKRYGRFQAAKELRGYLAQLSHNVR-----  
 MdomeDIA1 386 PGEIAK--DGRLEALLDECA-----HPKKRYGRFQAAKELREYLAQLSNNGR-----  
 GgallDIA1 385 PADIAK--DGRLEALLDECA-----NPKKRYGRFQAAKELREYLAQLSNNVR-----  
 XtropDIA1 385 PABIAK--DGRLEALLDECA-----NPKKRYGRFQAAKELREYLAQLSNNAR-----  
 BflorDIA1 375 PETVVR--DGTLQRLLAECA-----KPRRTLYGRFQAAKELTELLGSLFKDR-----  
 SpurpDIA1 376 PSDLSSYMRKVKQIAEACR-----SPSKRDGRMLVVKELKELTKMLKIT-----  
 NvectDIA1 364 PVALKA---SLNQLLODCT-----AQMNRNTREETAQKSELLQGYL-----  
 NvitrDIA1 360 PDYILQK--HPTLIDILLEQCA-----KPDIGYSRIDIAHKLIVLLDSVIKNA-----  
 AegyDIA1 350 GTDS---KLEAFRKLHQCQV---YCPYCEDRQEVLRQIMEIHDVLEHEVV-----  
 CpipiDIA1 353 PNDDSQRLSEIRQLLHHCV---YCPYCEDRQEVLRQIMEIHDVLEHEVV-----  
 AgambDIA1 361 RDAEAFVPLGEASKMLQNLSECVCYCPDPCQNRSHILKDMLHIDQTIQS-----  
 DyakuDIA1 310 -----ERLQILLEQCV---ACDDFCDMRFQCHAYDLIKVLDISKI-----  
 DerecDIA1 311 -----ERLQILLEQCV---ACDDFCDMRFQCHAYDLIKVLDISKI-----  
 DmelaDIA1 313 -----EKLQILLEQCV---ACDDFCDMRFQCHAYDLIKVLESNN-----  
 DsechDIA1 315 -----EKLQILLEQCV---ACDDFCDMRFQCHAYDLIKELESKN-----  
 DananDIA1 314 -----ERLQILLEKCV---ECDDLCDMRFQYAYDLIKLLDS-----  
 DpersDIA1 314 -----GRLEMILLEQCV---RCDDATCDMRFQYAYDLIKLLGELLS-----  
 DpseuDIA1 314 -----GRLEMILLEQCV---RCDDATCDMRFQYAYDLIKLLGELLS-----  
 DwillDIA1 304 -----HRLKMLNDCV---QCEDDKCDIRFKYANNLITLLVEINNKIEIL-----  
 CinteDIA1 395 KEFGVFS--SQMFVLLDICSRGKTAVAPERTLSHSIRRLAANQLRNVLERRRICSPDFK  
 consensus 421 p iak dgrlealldc npkkrygrfqaakelreyl ql

|            |                               |
|------------|-------------------------------|
| GaculDIA1  | -----                         |
| OlatiDIA1  | -----                         |
| TnigrDIA1  | -----                         |
| TrubrDIA1  | -----                         |
| DreriDIA1b | -----                         |
| DreriDIA1a | -----                         |
| BtaurDIA1  | -----                         |
| PpygmDIA1  | -----                         |
| CfamiDIA1  | -----                         |
| PtrogDIA1  | -----                         |
| TtrunDIA1  | -----                         |
| HsapiDIA1  | -----                         |
| MmulaDIA1  | -----                         |
| PvampDIA1  | -----                         |
| MmuscDIA1  | -----                         |
| RnorvDIA1  | -----                         |
| MdomeDIA1  | -----                         |
| GgallDIA1  | -----                         |
| XtropDIA1  | -----                         |
| BflorDIA1  | -----                         |
| SpurpDIA1  | -----                         |
| NvectDIA1  | -----                         |
| NvitrDIA1  | -----                         |
| AaegyDIA1  | -----                         |
| CpipiDIA1  | -----                         |
| AgambDIA1  | -----                         |
| DyakuDIA1  | -----                         |
| DerecDIA1  | -----                         |
| DmelaDIA1  | -----                         |
| DsechDIA1  | -----                         |
| DananDIA1  | -----                         |
| DpersDIA1  | -----                         |
| DpseuDIA1  | -----                         |
| DwillDIA1  | -----                         |
| CinteDIA1  | 453 YRYPECELAEDAGINLPSIELQWLH |
| consensus  | 481                           |
