# Supplementary material for: Characterization of the Deleted in Autism 1 Protein Family: Implications for Studying Cognitive Disorders
Source: PubMed Central journal article supplement (PMC3023760; doi:10.1371/journal.pone.0014547), 2011-01-19
Supplement: pone.0014547.s014.pdf [file pone.0014547.s014.pdf]

**Fig. S4**

```

AaegyDIA1 1 -----MSQ--HRILTKLHLVALFLWIVMKYQPEERASSLKSSLVQCCQYDTT
CpipiDIA1 1 -----MSSGFQRILVNHLILALLFCVIFEFQPKPESELTELLVNQCEYETQ
AgambDIA1 1 -----MQS----S-RLPYFVTLFIAVVLQYLPNEKSTSKRPLENVCDYDRN
DyakuDIA1 1 -----MHLSPGQLKVVLILALLQELQVKPQREVFQELFEKDL
DerecDIA1 1 -----MHLSPGQLKVVLILALLQELQVKPQREVFQELYEKDL
DmelaDIA1 1 -----MHLSHGQLKVVLILALLQELQVKPQREVFQELFEKDL
DsechDIA1 1 -----MHLSYGQLKVVLILALLQELQVKTQREVFQELFEKDL
DananDIA1 1 -----MHLLSGQLRIVLVLALLQDLQVKPQDIFQEHFFESDL
DpersDIA1 1 -----MHLSPGHLRIVLILALLQDLQVKPQDIFRAHLERDL
DpseuDIA1 1 -----MHLSPGHLRIVLILALLQDLQVKPQDIFRAHLERDL
DwillDIA1 1 -----MHLLYGQLKVVLVLALLQELDVRTQDIFRKHFNMDL
GaculDIA1 1 -----MLRFLPLKLGR--LYRCLKLLLVGLFVILLMNTHSLFASFQRNELTDRRFINL
OlatiDIA1 1 -----MLRFLPLKLGR--LYRCLKLLLVGLFVILLMNTHNLFASFQRNELTDRRFINL
TnigrDIA1 1 -----MLRFLPLKLGR--LYRCLKLLLVGLFVILLMNTHNLFASFQRNELTDRRFINL
TrubrDIA1 1 -----MLRFLPLKLGR--LYRCLKLLLVGLFVILLMNTHNLFASFQRNELTDRRFINL
DreriDIA1b 1 -----MLRFLPLKLGR--LYRCLKLLLFLGLFVILLMNTHNLFASFQRNELTDRRFINL
DreriDIA1a 1 -----MLRILSLKFGR--VYRCGKFLFIVALFVILLMNTHNLFASFQRNELTDRRFIGL
BtaurDIA1 1 -----MWRLVPPKLGR--LSRSLKLAALGSLLVLMVLHSPSLLASWQRNELADRRFLQL
PpygmDIA1 1 -----MWRLVPPKLGR--LSRSLKLAALGSLLVLMVLHSPSLLASWQRNELADRRFLQL
CfamiDIA1 1 -----MWRLVPPKLGR--LSRSLKLAALGSLLVLMVLHSPSLLASWQRNELADRRFLQL
TtrunDIA1 1 -----MWRLVPPKLGR--LSRSLKLAALGSLLVLMVLHSPSLLASWQRNELADRRFLQL
PtrogDIA1 1 -----MWRLVPPKLGR--LSRSLKLAALGSLLVLMVLHSPSLLASWQRNELADRRFLQL
HsapiDIA1 1 -----MWRLVPPKLGR--LSRSLKLAALGSLLVLMVLHSPSLLASWQRNELTDRRFLQL
MmulaDIA1 1 -----MWRLVPPKLGR--LSRSLKLAALGSLLVLMVLHSPSLLASWQRNELTDRRFLQL
PvampDIA1 1 -----MWRLVPPKLGR--LSRSLKLAALGSLLVLMVLHSPSLLASWQRNELADRRFLQL
MmuscDIA1 1 -----MWRLVPLKLGR--LSRALKLAALGSLLVLMLLHSPSLLASWQRNELADRRFLQL
RnorvDIA1 1 -----MWRLVPLKLGR--LSRALKLAALGSLLVLMLLHSPSLLASWQRNELADRRFLQL
MdomeDIA1 1 -----MWRLVPPKLGR--LSRSLKLAALGSLLVLMVLHSPSLLASWQRNELADRRFLQL
GgallDIA1 1 -----MLRLVSLKLGR--LYRYVKLAVLGSLAAALVLNTHSLLASLQRNELAERFLQL
XtropDIA1 1 -----MLRLASLKFGR--LFRYAKVLFAASLLVVMLLNTHSLSSFQRNELTDRRFLSL
SpurpDIA1 1 -----MRRYFNQFTNRFCISTTQLIWLVVLSSMCLFVYYQLYLHFTANHLENEYFTEA
RnorvDIA1R 1 MELGRPGAAATAFRQRWP-AWMLLWVSTLSCSFSLPASLPPSLVPRVRSSYTLGKTFLGL
MmuscDIA1R 1 MESQWRGAAATAFHOHWL-ARLLLWVSTLSCSFSLPASLPPSLVPRVRSSYTMGKTFLGL
MmulaDIA1R 1 MEP-QLGPEAAALRPGWL-A-LLLWVSALSCSFSLPASSPSSLVSQVRTSYNFGRTFLGL
HsapiDIA1R 1 MEP-QLGPEAAALRPGWL-A-LLLWVSALSCSFSLPASSLSSLVPQVRTSYNFGRTFLGL
BtaurDIA1R 1 MEP-RLGPKAAALHIGWP-F-LLLWVSGLSYSVSSPASPSPSPVSRVRTSYNLGKTFLGL
EcabaDIA1R 1 MEP-WLGPEAAALRPGWP-A-LLLWVSALRCSVSSPASPSPSLVPRVRTSYNFGRTFLGL
DordiDIA1R 1 MDP-QLGPEAAALRPGWQ-V-LLLLVSALSCFSSPASPPSLVSRVRTSYNLGRTFLGL
MdomeDIA1R 1 MES-VIHGPLASPCLGWL-T--LLQLVTLSCLSSTESLTAPSSVPRVKSYNFGRTFLGL
OanatDIA1R 1 MGL-RLGCRLFSAALSWM-T--LLQLTRGHGPVADASPAPSLVPRVKPSYSFGRTFLGL
GgallDIA1R 1 MGR--WICCLCSRVADWL-M--LLLVLARSSNPSAAATASPS-APHVRPSYSFGRTFLGL
DreriDIA1R 1 -----MAG--TWS--G-VWILCFILVFGTADP-----SPAPQ-DKSHDRKIFLGL
SsalaDIA1R 1 MPLKRCDQRAVG-SVRLT-VCVLSWLCVCWAPSVVEPAGTPPAQ-QKALLQRAFLGL
NvitrDIA1 1 -----MLVTKASVSSFLIALLILILGIYINRFNLKVAEITER
BflorDIA1 1 -----MRLVRLQFRR-FFSGWRVRRCGFFFVVFFYCFVFQPFSYNQLIDTTFLGE
NvectDIA1 1 --MHFGGILRKRRYICRVLLLVIISFSDLLWLSYQDGRAIKWDFSQHKLTFQEIGL
CinteDIA1 1 -MLLKMKRYLTVWENCKYIVFIFILITEVLLEMYNHRSQGSTRVMLEAKLISDKWSATS
consensus 1 r kmg l lkl v llvlm sl qk ver fl l

```



```

AaegyDIA1 94 QR---VVIKLNKEHGVEELISSICNDLKIYR---NCRLRNKEPYLR---VLRQRV
CpipiDIA1 96 QK---VVIKTLNKNRAVEALRDAVCDELGLTQS---NCKFKSDENTLK---VLRKRV
AgambDIA1 91 KL---AVMKHLNRDNTIEKLLQEYCDAYSITKQ---NCRWAQHHDGSVDR-AKEFITTSI
DyakuDIA1 90 Q-----VVAKRKIIDAQNOQ-IKDVKKAF-----YE-----
DerecDIA1 90 Q-----VVAKRKIIDARNHK-AENVEKAF-----YE-----
DmelaDIA1 90 QE---V-Q-LVAKRKIIDAQSNQ-INKVKKDF-----YE-----
DsechDIA1 90 QA---V-Q-LVAKRKIINAHSYQ-MKNVKRAF-----YE-----
DananDIA1 90 EK---SSQ-LVAKRKSIVASHQS-LSSLQEEF-----LN-----
DpersDIA1 90 QA---A-Q-LVAKRDAIGGHSYRNMGILREAF-----LE-----
DpseuDIA1 90 QA---A-Q-LVAKRDAIGGHSYRNMGILGEAF-----LE-----
DwillDIA1 90 EN---VK-CLAKRKMTRKISKD-----
GaculDIA1 101 EGTRR-VVLKRLGSNQELAEIDQKICKRATGRPR-CDLIQAMYKTEFARINGDVRLLTPE
OlatiDIA1 101 EGTRR-VVLKRLGSNQELAEIDQKICKRATGRPR-CDLVQAMYKTEFARINGDVRLLTPE
TnigrDIA1 101 EGTRR-VVLKRLGSNQELADIDQKICKRATGRPR-CDLIQAMYKTEFARINGDVRLLTPE
TrubrDIA1 101 EGTRR-VVLKRLGSNQELADIDQKICKRATGRPR-CDLIQAMYKTEFARINGDVRLLTPE
DreriDIA1b 101 EGTRR-IVLKRLGSNQELADIDQKICKRATGRPR-CDLIQAMYKTEFARINGDVRLLTPE
DreriDIA1a 101 EGTRR-VVLKRLGSNQELAEIDQKICKRATGRPR-CDLIQSMYKTEFARINGDVRLLTPE
BtaurDIA1 101 EGGRRRVVLKRLGSOELAQLDOSICKRATGRPR-CDLLQAMPRTFARINGDVRLLTPE
PpygmDIA1 101 EGGRRRVVLKRLGSOELAQLDOSICKRATGRPR-CDLLQAMPRTFARINGDVRLLTPE
CfamiDIA1 101 EGGRRRVVLKRLGSOELAQLDOSICKRATGRPR-CDLLQAMPRTFARINGDVRLLTPE
TtrunDIA1 101 EGGRRRVVLKRLGSOELAQLDOSICKRATGRPR-CDLLQAMPRTFARINGDVRLLTPE
PtrogDIA1 101 EGGRRRVVLKRLGSOELAQLDOSICKRATGRPR-CDLLQAMPRTFARINGDVRLLTPE
HsapiDIA1 101 EGGRRRVVLKRLGSOELAQLDOSICKRATGRPR-CDLLQAMPRTFARINGDVRLLTPE
MmulaDIA1 101 EGGRRRVVLKRLGSOELAQLDOSICKRATGRPR-CDLLQAMPRTFARINGDVRLLTPE
PvampDIA1 101 EGGRRRVVLKRLGSOELAQLDOSICKRATGRPR-CDLLQAMPRTFARINGDVRLLTPE
MmuscDIA1 101 EGGRRRVVLKRLGSOELAQLDOSICKRATGRPR-CDLLQAMPRTFARINGDVRLLTPE
RnorvDIA1 101 EGGRRRVVLKRLGSOELAQLDOSICKRATGRPR-CDLLQAMPRTFARINGDVRLLTPE
MdomeDIA1 101 EGGRRRVVLKRLGSOELAQLDOSICKRATGRPR-CDLLQAMPRTFARINGDVRLLTPE
GgallDIA1 101 EGSRR-VVLKRLGSAQELADIDAKICRRATGRGR-CDLLQALHATEFASLNGDVRLLTPE
XtropDIA1 101 EGSRR-VVLKRLGSHNELSELDQRIKCKATGRPR-CDLVQAMYKTEFARINGDVRLLTPE
SpurpDIA1 99 -LDQKPVVMKRLGHNSEHNQFDKDLCTNAESGLRGCDVSQQIYKSKLSDIMYAEERLEEKD
RnorvDIA1R 107 SKTWRPVEISRLVSKYQSEISDKRICASASGPKT-CSTIERILRKTGRFQKWLQAKRLTPD
MmuscDIA1R 107 SKTWRPVEISQLVSRYOIEISDRRICASVSAPKT-CSTIERILQKTGRFQKWLQAKRLTPD
MmulaDIA1R 105 SKIWRPVEIFRLVSNYQNEISDRRICASASAPRT-CSTIERVLRKTERFQKWLQAKRLTPD
HsapiDIA1R 105 SKIWRPVEIFRLVSKYQNEISDRRICASASAPKT-CSTIERVLRKTERFQKWLQAKRLTPD
BtaurDIA1R 105 FKTWRPVEISRLVSKQQNKISDGRICASAAAPKT-CSTIERVLRKTERFQKWLQAKRLTPD
EcabaDIA1R 105 SKTWRPVEISRLVSKQQNEISDRRICAFAAAPKT-CSTIERVLRKTRRFQKWLQAKRLTPD
DordiDIA1R 105 SKTWRPVEIFRLVSKQNEISDRRICAFASAPKT-CSTIERILRKTGRFQKWLQAKRLTPD
MdomeDIA1R 104 TKSWRPVEISRLVSKYQHELSDRRICASASGSKT-CSTIERVLRKTERVKKWLKAKRLTPD
OanatDIA1R 104 SKSWRLVEISRLIGKDQNELSDOKICTSVSLVKT-CSTIERVLRKTERFQKWLKARRLTPA
GgallDIA1R 102 AQSWMVDITRLTKYQHADRADQHICTSLLKTKT-CSLERALRRTHRFQKWLAKRLTPD
DreriDIA1R 88 TAGWRPVVVSRLMSPHLHQLSDNSICTSAGKGS-CSIEGVLRSRFRQTVVHNSNLLLP
SsalaDIA1R 105 SLSWRPVVLSFLSPLCHSSDRSICRSVGRQGP-CSIEAVLRVTFRQSLNQSHELLLPH
NvitrDIA1 85 ----KKVIMKLAQSEIKTFDEMICSDELHEL-CYQSESRSKQDSKTNFYKLVESELAN
BflorDIA1 99 ----MEVALKRLGHNSEFDQLDRWICETKEGPQ-CHIPSVTYYSNFSRVYEG--LSPK
NvectDIA1 106 QR---VVLKTLGTSSSELTAFDNEICRGVGKDSN-CKISQEAWDSVVLVP-----KP
CinteDIA1 118 PCNGETCSVQIETSVLSGNVNVKWCDFKFKPTN-CDTGKVFKSWRAMNKITSAGRLDLP
consensus 121 r vvikrlas v ldq ick asg c l m kte rlltpe

```

AaegyDIA1 141 LNDNQLEGAILCPLMDE--EALKRFLFEID-----E-----NDLNKILLMRINAQPLIL  
 CpipiDIA1 144 L-EQELEGCIICPSKDE--KALNRLLNEVE-----G-----TELLQILLLKVNVOPLILL  
 AgambDIA1 143 LDSARVEGCIFCPATNNR-QSLQRFLSLFDS----TD-----NEIWNLLAVRTNVEPLLI  
 DyakuDIA1 115 -LGERPGGFHLCRTPSRKPRFVSYLEQRGH----A-----SASVWFYMMHYVSPLLM  
 DerecDIA1 115 -QEEQPGGFHLCRTPSRKPPRFVSYLEQRGH----A-----SASVWFYMMHYVSPLLM  
 DmelaDIA1 118 -LEERPGGFHLCRTLAREP-RFVSYLEQRGH----A-----AASVWFYMMHYVSPLLM  
 DsechDIA1 118 -LEERPGGFHLCRTLAREP-RFVSYLEQRGH----VY-----GSTSVWFYMMHYVSPLLM  
 DananDIA1 119 -LEERPGGFHLCRTAQKSS-PFINYLNRGY----D-----SSSYFYMLHNI SPLLM  
 DpersDIA1 119 -MEERPGGFQLCRSGFRTP-RFVSYLEQRGH----E-----AATWYWMHSITPLLM  
 DpseuDIA1 119 -MEERPGGFQLCRSGFRTP-RFVSYLEQRGH----E-----AATWYWMHSITPLLM  
 DwillDIA1 108 -LHFNPGGFQMCRNSTR---FLAYLEERGY----L-----PATIGYLIHHSISPLLM  
 GaculDIA1 159 VVEGWSDLVH-CPSQRLLDRLVRRYAETKDSGSFLLRNLKDTERMQLLMTLAFNPEPLVL  
 OlatiDIA1 159 VVEGWSDLVH-CPSQRLLDRLVRRYAETKDSGSFLLRNLKDTERMQLLMTLAFNPEPLVL  
 TnigrDIA1 159 VVEGWSDLVH-CPSQRLLDRLVRRYAETKDSGSFLLRNLKDTERMQLLMTLAFNPEPLVL  
 TrubrDIA1 159 VVEGWSDLVH-CPSQRLLDRLVRRYAETKDSGSFLLRNLKDTERMQLLMTLAFNPEPLVL  
 DreriDIA1b 159 VVEGWSDLVH-CPSQRLLDRLVRRYAETKDSGSFLLRNLKDTERMQLLMTLAFNPEPLVL  
 DreriDIA1a 159 VVEGWSDLVH-CPSQRLLDRLVRRYAETKDSGSFLLRNLKDTERMQLLMTLAFNPEPLVL  
 BtaurDIA1 160 AVEGWSDLVH-CPSQRLLDRLVRRYAETKDSGSFLLRNLKDSERMQLLMTLAFNPEPLVL  
 PpygmDIA1 160 AVEGWSDLVH-CPSQRLLDRLVRRYAETKDSGSFLLRNLKDSERMQLLMTLAFNPEPLVL  
 CfamiDIA1 160 AVEGWSDLVH-CPSQRLLDRLVRRYAETKDSGSFLLRNLKDSERMQLLMTLAFNPEPLVL  
 TtrunDIA1 160 AVEGWSDLVH-CPSQRLLDRLVRRYAETKDSGSFLLRNLKDSERMQLLMTLAFNPEPLVL  
 PtrogDIA1 160 AVEGWSDLVH-CPSQRLLDRLVRRYAETKDSGSFLLRNLKDSERMQLLMTLAFNPEPLVL  
 HsapiDIA1 160 AVEGWSDLVH-CPSQRLLDRLVRRYAETKDSGSFLLRNLKDSERMQLLMTLAFNPEPLVL  
 MmulaDIA1 160 AVEGWSDLVH-CPSQRLLDRLVRRYAETKDSGSFLLRNLKDSERMQLLMTLAFNPEPLVL  
 PvampDIA1 160 AVEGWSDLVH-CPSQRLLDRLVRRYAETKDSGSFLLRNLKDSERMQLLMTLAFNPEPLVL  
 MmuscDIA1 160 AVEGWSDLVH-CPSQRLLDRLVRRYAETKDSGSFLLRNLKDSERMQLLMTLAFNPEPLVL  
 RnorvDIA1 160 AVEGWSDLVH-CPSQRLLDRLVRRYAETKDSGSFLLRNLKDSERMQLLMTLAFNPEPLVL  
 MdomeDIA1 160 AVEGWSDLVH-CPSQRLLDRLVRRYAETKDSGSFLLRNLKDSERMQLLMTLAFNPEPLVL  
 GgallDIA1 159 AVEGWSDLVH-CPSQRLLDRLVRRYAETKDSGSFLLRNLKDSERMQLLMTLAFNPEPLVL  
 XtropDIA1 159 VVEGWSDLVH-CPSQRLLDRLVRRYAETKDSGSFLLRNLKDTERMQLLMTLAFNPEPLVL  
 SpurpDIA1 158 -VMGLSDIVR-CPSRRLLDRIWDTFGERQ---FD-KSLARDHKLMATTI AFNPEPLIL  
 RnorvDIA1R 166 LVQGLPSPFLHCPQSRLLDRLVRRYAETVVDAGSIFMDHFTDRDKLRLLYTLAVNAHPIL  
 MmuscDIA1R 166 LVQGLPSPFLRCPQSRLLDRLVRRYAETVVDAGSIFMDHFTAGDKLRLLYTLAVNAHPIL  
 MmulaDIA1R 164 LVQGLASPLLRCPQSRLLDRLVRRYAETVVDAGSIFMDHFTDRDKLRLLYTLAVNSHPILL  
 HsapiDIA1R 164 LVQGLASPLLRCPQSRLLDRLVRRYAETVVDAGSIFMDHFTDRDKLRLLYTLAVNSHPILL  
 BtaurDIA1R 164 LVRGLSSPLLRCPQSRLLDRLVRRYAETVVDAGSIFMDHFTDRDKLRLLYTLAVNTHPVLL  
 EcabaDIA1R 164 LVRGLPSPFLRCPQSRLLDRLVRRYAETVVDAGSIFMDHFTDRDKLRLLYTLAVNAHPIL  
 DordiDIA1R 164 LVQGLPSPFLRCPQSRLLDRLVRRYAETVVDAGSIFMDHFTDRDKLRLLYTLAVNAHPIFL  
 MdomeDIA1R 163 LVQGLPSPMLRCPQSRLLDRLVRRYAETVVDAGSVFMDHFTDRDKLRLLYTLAVNSHPIML  
 OanatDIA1R 163 LVQGLPSPMLRCPQSRLLDRLVRRYAETVVDAGSVYMDHFTDRDKLRLLYTLAVNSHPVLL  
 GgallDIA1R 161 LVQGLSSPMLRCPQSRLLDRLVRRYAETVVDAGSIYMDHLTDQDKLRLLYTLAVNSHPILL  
 DreriDIA1R 147 MVKGLVTPMLRCPQSRLLDRLVRRYFEVTDVGSVQMKHFNEKDKLRLLYTLAVNQOPLIL  
 SsalaDIA1R 164 IVKGLAPPLRCPQSRLLDRLVRRYAETVVDVGSVQMKHFSEKDKLRLLYTLAVNQOPLIL  
 NvitrDIA1 140 VGGDINNMRLCPTTTKLEKLFVNKVFQSHAE-----NEDYFKYLWSTIKINPEPLIL  
 BflorDIA1 152 SLGDMSDMVR-CPSQRLLDRLVLEKFAEHLG---KETEELSYQEKLHFLSTLKFNPPEPLML  
 NvectDIA1 153 PLQDAVRKYFDCPSTRFLEKIESVYQETPG-----QLSLVETIHLITGLHLNPEPLILL  
 CinteDIA1 177 NLLKDISPPLQCPSTRFADRLVRRYVANKQGG--VLIIRDLSYTEKKRLIFTCCKMSPGSSVQ  
 consensus 181 veg e vh Cpsqrlldrvvrryae rd gs v l d erl ll tla npeplll

|            |     |                                                                |
|------------|-----|----------------------------------------------------------------|
| AaegyDIA1  | 188 | KLL-----QERNFPVPKLIFQGGFTLVESYEG-EALAKYYDRPLN--VRLLIANELIKAS   |
| CpipiDIA1  | 190 | ELF-----DGRGFPVPKLIFQGGFQLFESFDG-DALVNFYDSSLN--IRLRIAKELIQAS   |
| AgambDIA1  | 193 | KLLTVNYHDEPPLYVPKLILHTFGFSIIETVEG-KTLEHYDYDFPFV--TRMRIAAELIRAG |
| DyakuDIA1  | 162 | QEL-----YLQGFVPTTYASCGLTHFQSYAG-RTLITNYFEGEED--LRVELALQLMQLS   |
| DerecDIA1  | 163 | QEL-----HLQGFVPTTYASCGLTHFQAYAG-RTLITNYFEAEEG--LRMELALQLIQLS   |
| DmelaDIA1  | 165 | QEL-----HLQGFVPTTYASCGLTHFQSNAG-RTLAHYVDAEEG--LRVELALQLIQLS    |
| DsechDIA1  | 167 | QEL-----HLQGFVPTTYASCGLTHFQSYAG-RTLAHYVNAEEG--LRLELALQLIQLS    |
| DananDIA1  | 166 | QEL-----QNLDFPVNTYAIICGLTHFQAYAG-RTLNHYTEAAED--LRREIARQLIHLS   |
| DpersDIA1  | 166 | QEL-----FLRGFPVPRSYAACGLTHFQAYAG-RTLTVHYATAGEN--LRLEMARQLLQLS  |
| DpseuDIA1  | 166 | QEL-----FLRGFPVPRSYAACGLTHFQAYAG-RTLTVHYATAGEN--LRLEMARQLLQLS  |
| DwillDIA1  | 152 | QEL-----WIMDFPVPFSFAACGLTHFQAYAG-STLSNYLKPAPID--LRLEMAKQLQLA   |
| GaculDIA1  | 218 | CSFP----SDEGWPFKYLGACGRMVAVNYVG-EELWSFYFNAPWE--KRVDLARQLMDIA   |
| OlatiDIA1  | 218 | CSFP----SDEGWPFKYLGACGRMVAVNYVG-EELWNFYFNAPWE--KRVDLARQLMDIA   |
| TnigrDIA1  | 218 | CSFP----SDEGWPFKYLGACGRVAVNYVG-EELWSFYFNAPWE--KRVDLARQLMDIA    |
| TrubrDIA1  | 218 | CSFP----SDEGWPFKYLGACGRVAVNYVG-EELWSFYFNAPWE--KRVDLARQLMDIA    |
| DreriDIA1b | 218 | CSFP----SDEGWPFKYLGACGRMVAVNYVG-EELWSFFNAPWE--KRVDLAKQLMDIA    |
| DreriDIA1a | 218 | CSFP----SDEGWPFKYLGACGRMVAVNYVG-EELWSFYFNAPWE--KRVDLAKQLMDIA   |
| BtaurDIA1  | 219 | CSFP----SDEGWPFKYLGACGRMVAVNYVG-EELWSFYFNAPWE--KRVDLAWQLMEIA   |
| PpygmDIA1  | 219 | CSFP----SDEGWPFKYLGACGRMVAVNYVG-EELWSFYFNAPWE--KRVDLAWQLMEIA   |
| CfamiDIA1  | 219 | CSFP----SDEGWPFKYLGACGRMVAVNYVG-EELWSFYFNAPWE--KRVDLAWQLMEIA   |
| TtrunDIA1  | 219 | CSFP----SDEGWPFKYLGACGRMVAVNYVG-EELWSFYFNAPWE--KRVDLAWQLMEIA   |
| PtrogDIA1  | 219 | CSFP----SDEGWPFKYLGACGRMVAVNYVG-EELWSFYFNAPWE--KRVDLAWQLMEIA   |
| HsapiDIA1  | 219 | CSFP----SDEGWPFKYLGACGRMVAVNYVG-EELWSFYFNAPWE--KRVDLAWQLMEIA   |
| MmulaDIA1  | 219 | CSFP----SDEGWPFKYLGACGRMVAVNYVG-EELWSFYFNAPWE--KRVDLAWQLMEIA   |
| PvampDIA1  | 219 | CSFP----SDEGWPFKYLGACGRMVAVNYVG-EELWSFFNAPWE--KRVDLAWQLMEIA    |
| MmuscDIA1  | 219 | CSFP----SDEGWPFKYLGACGRMVAVNYVG-EELWSFYFNAPWE--KRVDLAWQLMEIA   |
| RnorvDIA1  | 219 | CSFP----SDEGWPFKYLGACGRMVAVNYVG-EELWSFYFNAPWE--KRVDLAWQLMEIA   |
| MdomeDIA1  | 219 | CSFP----SDEGWPFKYLGACGRMVAVNYVG-EELWSFYFNAPWE--KRVDLAWQLMEIA   |
| GgallDIA1  | 218 | CSFP----SDEGWPFKYLGACGRMVAVNYVG-EELWSFYFNAPWE--KRVDLAWQLMEIA   |
| XtropDIA1  | 218 | CSFP----SDEGWPFKYLGACGRMVAVNYVG-EELWSFYFNAPWE--KRVDLAWQLMEIA   |
| SpurpDIA1  | 211 | CAFP----NRKGWPFKYLGACGRFTVQEYSG-HLSLYFYKFKFG--VRAALAVQALKIA    |
| RnorvDIA1R | 226 | QIFP----GAEGWPMFKYLGSCGRFLVSTST--RPLQEFYDAPPE--QAADLAWQLLGVL   |
| MmuscDIA1R | 226 | QIFP----GAEGWPMFKYLGSCGRFLVSTST--RPLQEFYDASPE--QAADLAWQLLRVL   |
| MmulaDIA1R | 224 | QIFP----GAEGWPLPKYLGSCGRFLVSTST--RPLQEFYDAPPD--QAADLAWQLLGVL   |
| HsapiDIA1R | 224 | QIFP----GAEGWPLPKYLGSCGRFLVSTST--RPLQEFYDAPPD--QAADLAWQLLGVL   |
| BtaurDIA1R | 224 | QIFP----GAEGWPLPKYLGSCGRFLVSTST--SPLQEFYDAPPD--QAADLAWQLLGVL   |
| EcabaDIA1R | 224 | QIFP----GAEGWPLPKYLGSCGRFLVSTST--SPLQEFYDAPPD--QAADLAWQLLGVL   |
| DordiDIA1R | 224 | QIFP----GAEGWPLPKYLGSCGRFFVSTST--RPLQEFYDAPPD--EAADLAWQLLGVL   |
| MdomeDIA1R | 223 | QIFP----GAEGWPLPKYLGSCGRFLVSTST--QPLEEFYSSPAD--QAADLAWQLLGVL   |
| OanatDIA1R | 223 | QVFP----GAEGWPMFKYLGSCGRLLVSTST--TPLLELSSGPPD--RAADLAWQLLGVI   |
| GgallDIA1R | 221 | QIFP----DVEGWPMFKYLGSCGRLLVVSAST--RPLRDFFRAPPE--VAADLAWQLLAVL  |
| DreriDIA1R | 207 | QMFP----GTEGWPMFKYLGSCGRLLVWVAAS--RALRTLFSPPLE--RRADLAWQLLHIT  |
| SsalaDIA1R | 224 | QMFP----GTEGWPMFKYLGSCGRLLVWVASS--RPLWGLYGSSRFVQRVDVAYQLLHIT   |
| NvitrDIA1  | 193 | QILP----AKEGWPMFKYLGSCGRLLVVEEYIG-LPLSSFIDEPWIR--RAKLASSLLQAA  |
| BflorDIA1  | 208 | QIFP----ITEGWPMFKYLGSCGRLLVVKCD-KTLASYSAPWL--KRVELSLQMMKIA     |
| NvectDIA1  | 207 | QIFR----QEGWPMFKYLGSCGRLLVVEDSG-PPISSFLEESWD--VRAQIAVNLITLA    |
| CinteDIA1  | 235 | SMFP----PYEGWPMFKYLGSCGRLLVHGRSIVTSLYELYDAPWK--VRDLVAIQLLDLA   |
| consensus  | 241 | q fp egwpmfkylgacGrml y g l yy apfe rldla qli ia               |

|            |     |     |          |     |      |       |        |       |       |      |     |     |      |      |   |     |      |     |     |     |     |    |     |       |       |     |     |   |   |     |     |     |     |    |    |   |   |    |    |    |   |   |    |    |   |   |   |   |   |   |     |     |     |   |   |
|------------|-----|-----|----------|-----|------|-------|--------|-------|-------|------|-----|-----|------|------|---|-----|------|-----|-----|-----|-----|----|-----|-------|-------|-----|-----|---|---|-----|-----|-----|-----|----|----|---|---|----|----|----|---|---|----|----|---|---|---|---|---|---|-----|-----|-----|---|---|
| AaegyDIA1  | 240 | LNF | TAGVDNFR | YLT | DISP | DNIVV | SMSSEE | -EIKV | TFV   | DLN  | NVI | I   | ILD  | SHSK | R | LKP | ---  | SK  |     |     |     |    |     |       |       |     |     |   |   |     |     |     |     |    |    |   |   |    |    |    |   |   |    |    |   |   |   |   |   |   |     |     |     |   |   |
| CpipiDIA1  | 242 | FLF | TEGVNGFR | YLT | DNPN | DNIAV | QAQPSG | -SFQV | SFID  | LDN  | VII | I   | ILDS | QSKR | L | DRR | --   | SK  |     |     |     |    |     |       |       |     |     |   |   |     |     |     |     |    |    |   |   |    |    |    |   |   |    |    |   |   |   |   |   |   |     |     |     |   |   |
| AgambDIA1  | 250 | FKF | TEGIHGFR | VFL | T    | INPD  | DNVVV  | NLKN  | DNKQ  | VYVS | I   | V   | DL   | DN   | V | I   | ILDS | WA  | EV  | FLT | --- | KN |     |       |       |     |     |   |   |     |     |     |     |    |    |   |   |    |    |    |   |   |    |    |   |   |   |   |   |   |     |     |     |   |   |
| DyakuDIA1  | 214 | LKL | TGFSDFR  | I   | ML   | T     | DFTG   | DNFAY | DEHT  | TK   | --- | V   | YL   | I    | D | L   | D    | S   | V   | V   | L   | D  | --- | ASSAT | --    | GQ  |     |   |   |     |     |     |     |    |    |   |   |    |    |    |   |   |    |    |   |   |   |   |   |   |     |     |     |   |   |
| DerecDIA1  | 215 | LKL | TGFSDFR  | I   | F    | L     | T      | DFTG  | DNFAY | DEDS | KR  | --- | V    | YL   | I | D   | L    | D   | S   | V   | V   | L  | D   | ---   | ASSAA | --  | GQ  |   |   |     |     |     |     |    |    |   |   |    |    |    |   |   |    |    |   |   |   |   |   |   |     |     |     |   |   |
| DmelaDIA1  | 217 | LKL | TGFAFDR  | I   | L    | T     | DFT    | A     | D     | N    | L   | A   | D    | E    | D | E   | T    | K   | --- | V   | YL  | I  | D   | L     | D     | S   | V   | V | L | D   | --- | AS  | FAA | -- | GH |   |   |    |    |    |   |   |    |    |   |   |   |   |   |   |     |     |     |   |   |
| DsechDIA1  | 219 | LKL | TGFAFDR  | I   | L    | T     | DFT    | A     | D     | N    | L   | A   | D    | E    | E | T   | K    | --- | V   | YL  | I   | D  | L   | D     | S     | V   | V   | L | D | --- | ASS | MA  | --  | GQ |    |   |   |    |    |    |   |   |    |    |   |   |   |   |   |   |     |     |     |   |   |
| DananDIA1  | 218 | LKL | TGFAFDR  | I   | F    | L     | T      | DFT   | S     | D    | N   | L   | T    | F    | D | E   | D    | T   | R   | --- | V   | L  | I   | D     | L     | D   | S   | V | V | M   | D   | --- | A   | A  | S  | T | S | -- | GQ |    |   |   |    |    |   |   |   |   |   |   |     |     |     |   |   |
| DpersDIA1  | 218 | LKL | TGFAFDR  | I   | F    | L     | T      | DFT   | A     | D    | N   | L   | A    | F    | D | E   | A    | S   | Q   | --- | V   | I  | L   | I     | D     | L   | D   | S | V | V   | L   | D   | --- | A  | A  | V | P | L  | -- | GD |   |   |    |    |   |   |   |   |   |   |     |     |     |   |   |
| DpseuDIA1  | 218 | LKL | TGFAFDR  | I   | F    | L     | T      | DFT   | A     | D    | N   | L   | A    | F    | D | E   | A    | S   | Q   | --- | V   | I  | L   | I     | D     | L   | D   | S | V | V   | L   | D   | --- | A  | A  | V | P | L  | -- | GD |   |   |    |    |   |   |   |   |   |   |     |     |     |   |   |
| DwillDIA1  | 204 | LKL | SAGFKGR  | I   | Y    | L     | T      | DFT   | A     | D    | N   | F   | A    | Y    | N | E   | A    | N   | G   | --- | V   | L  | L   | I     | D     | M   | D   | T | M | V   | L   | V   | E   | S  | N  | D | E | A  | E  | S  | E | S | -- | QL |   |   |   |   |   |   |     |     |     |   |   |
| GaculDIA1  | 271 | EQL | TN       | N   | D    | F     | F      | A     | L     | Y    | L   | D   | V    | S    | F | D   | N    | F   | A   | V   | G   | P  | R   | D     | G     | --- | V   | I | V | D   | A   | E   | N   | V  | L  | V | A | D  | K  | R  | L | I | K  | Q  | N | K | - | P | E | S | F   |     |     |   |   |
| OlatiDIA1  | 271 | EQL | TN       | N   | D    | F     | F      | A     | L     | Y    | L   | D   | V    | S    | F | D   | N    | F   | A   | V   | G   | P  | R   | D     | G     | --- | V   | I | V | D   | A   | E   | N   | V  | L  | V | A | D  | K  | R  | L | I | K  | Q  | N | K | - | P | E | S | Y   |     |     |   |   |
| TnigrDIA1  | 271 | EQL | TN       | N   | D    | F     | F      | A     | L     | Y    | L   | D   | V    | S    | F | D   | N    | F   | A   | V   | G   | P  | R   | D     | G     | --- | V   | I | I | V   | D   | A   | E   | N  | V  | L | V | A  | D  | K  | R | L | I  | K  | Q | N | K | - | P | E | N   | F   |     |   |   |
| TrubrDIA1  | 271 | EQL | TN       | N   | D    | F     | F      | A     | L     | Y    | L   | D   | V    | S    | F | D   | N    | F   | A   | V   | G   | P  | R   | D     | G     | --- | V   | I | I | V   | D   | A   | E   | N  | V  | L | V | A  | D  | K  | R | L | I  | K  | Q | N | K | - | P | E | N   | Y   |     |   |   |
| DreriDIA1b | 271 | EQL | TN       | N   | D    | F     | F      | A     | L     | Y    | L   | D   | V    | S    | F | D   | N    | F   | A   | V   | G   | P  | R   | D     | G     | --- | V   | I | V | D   | A   | E   | N   | V  | V  | A | D | K  | R  | L  | I | K | Q  | N  | K | - | P | E | S | Y |     |     |     |   |   |
| DreriDIA1a | 271 | EQL | TN       | N   | D    | F     | F      | A     | L     | Y    | L   | D   | V    | S    | F | D   | N    | F   | A   | V   | G   | P  | R   | D     | G     | --- | V   | I | V | I   | D   | A   | E   | N  | V  | I | V | A  | D  | K  | R | L | V  | K  | Q | N | K | - | P | E | S   | Y   |     |   |   |
| BtaurDIA1  | 272 | EQL | TN       | N   | D    | F     | F      | A     | L     | Y    | L   | D   | V    | S    | F | D   | N    | F   | A   | V   | G   | P  | R   | D     | G     | --- | V   | I | I | V   | D   | A   | E   | N  | V  | L | V | A  | D  | K  | R | L | I  | R  | Q | N | K | - | P | E | N   | W   |     |   |   |
| PpygmDIA1  | 272 | EQL | TN       | N   | D    | F     | F      | A     | L     | Y    | L   | D   | V    | S    | F | D   | N    | F   | A   | V   | G   | P  | R   | D     | G     | --- | V   | I | I | V   | D   | A   | E   | N  | V  | L | V | A  | D  | K  | R | L | I  | R  | Q | N | K | - | P | E | N   | W   |     |   |   |
| CfamiDIA1  | 272 | EQL | TN       | N   | D    | F     | F      | A     | L     | Y    | L   | D   | V    | S    | F | D   | N    | F   | A   | V   | G   | P  | R   | D     | G     | --- | V   | I | I | V   | D   | A   | E   | N  | V  | L | V | A  | D  | K  | R | L | I  | R  | Q | N | K | - | P | E | N   | W   |     |   |   |
| TtrunDIA1  | 272 | EQL | TN       | N   | D    | F     | F      | A     | L     | Y    | L   | D   | V    | S    | F | D   | N    | F   | A   | V   | G   | P  | R   | D     | G     | --- | V   | I | I | V   | D   | A   | E   | N  | V  | L | V | A  | D  | K  | R | L | I  | R  | Q | N | K | - | P | E | N   | W   |     |   |   |
| PtrogDIA1  | 272 | EQL | TN       | N   | D    | F     | F      | A     | L     | Y    | L   | D   | V    | S    | F | D   | N    | F   | A   | V   | G   | P  | R   | D     | G     | --- | V   | I | I | V   | D   | A   | E   | N  | V  | L | V | A  | D  | K  | R | L | I  | R  | Q | N | K | - | P | E | N   | W   |     |   |   |
| HsapiDIA1  | 272 | EQL | TN       | N   | D    | F     | F      | A     | L     | Y    | L   | D   | V    | S    | F | D   | N    | F   | A   | V   | G   | P  | R   | D     | G     | --- | V   | I | I | V   | D   | A   | E   | N  | V  | L | V | A  | D  | K  | R | L | I  | R  | Q | N | K | - | P | E | N   | W   |     |   |   |
| MmulaDIA1  | 272 | EQL | TN       | N   | D    | F     | F      | A     | L     | Y    | L   | D   | V    | S    | F | D   | N    | F   | A   | V   | G   | P  | R   | D     | G     | --- | V   | I | I | V   | D   | A   | E   | N  | V  | L | V | A  | D  | K  | R | L | I  | R  | Q | N | K | - | P | E | N   | W   |     |   |   |
| PvampDIA1  | 272 | EQL | TN       | N   | D    | F     | F      | A     | L     | Y    | L   | D   | V    | S    | F | D   | N    | F   | A   | V   | G   | P  | R   | D     | G     | --- | V   | I | I | V   | D   | A   | E   | N  | V  | L | V | A  | D  | K  | R | L | I  | R  | Q | N | K | - | P | E | N   | W   |     |   |   |
| MmuscDIA1  | 272 | EQL | TN       | N   | D    | F     | F      | A     | L     | Y    | L   | D   | V    | S    | F | D   | N    | F   | A   | V   | G   | P  | R   | D     | G     | --- | V   | I | I | V   | D   | A   | E   | N  | V  | L | V | A  | D  | K  | R | L | I  | R  | Q | N | K | - | P | E | N   | W   |     |   |   |
| RnorvDIA1  | 272 | EQL | TN       | N   | D    | F     | F      | A     | L     | Y    | L   | D   | V    | S    | F | D   | N    | F   | A   | V   | G   | P  | R   | D     | G     | --- | V   | I | I | V   | D   | A   | E   | N  | V  | L | V | A  | D  | K  | R | L | I  | R  | Q | N | K | - | P | E | N   | W   |     |   |   |
| MdomeDIA1  | 272 | EQL | TN       | N   | D    | F     | F      | A     | L     | Y    | L   | D   | V    | S    | F | D   | N    | F   | A   | V   | G   | P  | R   | D     | G     | --- | V   | I | I | V   | D   | A   | E   | N  | V  | L | V | A  | D  | K  | K | L | I  | R  | Q | N | K | - | P | E | N   | W   |     |   |   |
| GgallDIA1  | 271 | EQL | TN       | N   | D    | F     | F      | A     | L     | Y    | L   | D   | V    | S    | F | D   | N    | F   | A   | V   | G   | P  | R   | D     | G     | --- | V   | I | I | V   | D   | A   | E   | N  | V  | L | V | A  | D  | K  | R | L | I  | R  | Q | N | K | - | P | E | N   | W   |     |   |   |
| XtropDIA1  | 271 | EQL | TN       | N   | D    | F     | F      | A     | L     | Y    | L   | D   | V    | S    | F | D   | N    | F   | A   | V   | G   | P  | R   | D     | G     | --- | V   | I | I | V   | D   | A   | E   | N  | V  | L | V | A  | D  | K  | K | L | I  | K  | Q | N | K | - | P | E | N   | W   |     |   |   |
| SpurpDIA1  | 264 | EQL | SEN      | R   | D    | E     | F      | A     | L     | Y    | L   | T   | D    | V    | S | E   | D    | N   | L   | A   | V   | N  | -   | N     | G     | E   | --- | V | L | V   | I   | D   | A   | E  | N  | I | V | V  | D  | K  | K | I | K  | E  | D | A | - | N | P | G | W   |     |     |   |   |
| RnorvDIA1R | 278 | ESL | R        | S   | N    | D     | L      | N     | Y     | F    | F   | Y   | F    | T    | H | V   | D    | A   | G   | M   | F   | G  | I   | F     | D     | -   | N   | G | H | --- | L   | F   | I   | R  | D  | A | S | A  | L  | G  | I | I | D  | K  | Q | E | A | S | Q | A | --- | A   | D   | R |   |
| MmuscDIA1R | 278 | ESL | R        | S   | N    | D     | L      | N     | Y     | F    | F   | Y   | F    | T    | H | V   | D    | A   | G   | M   | F   | G  | I   | F     | D     | -   | N   | G | H | --- | L   | F   | I   | R  | D  | A | S | A  | L  | G  | I | I | D  | K  | Q | E | G | S | Q | A | --- | A   | A   | R |   |
| MmulaDIA1R | 276 | ESL | R        | S   | N    | D     | L      | N     | Y     | F    | F   | Y   | F    | T    | H | I   | D    | A   | G   | M   | F   | G  | V   | F     | N     | -   | N   | G | H | --- | L   | F   | I   | R  | D  | A | S | A  | V  | G  | V | I | D  | K  | Q | E | G | S | Q | E | --- | A   | T   | R |   |
| HsapiDIA1R | 276 | ESL | R        | S   | N    | D     | L      | N     | Y     | F    | F   | Y   | F    | T    | H | I   | D    | A   | G   | M   | F   | G  | V   | F     | N     | -   | N   | G | H | --- | L   | F   | I   | R  | D  | A | S | A  | V  | G  | V | I | D  | K  | Q | E | G | S | Q | E | --- | A   | N   | R |   |
| BtaurDIA1R | 276 | ESL | R        | S   | N    | D     | L      | N     | Y     | F    | F   | Y   | F    | T    | H | V   | D    | A   | D   | M   | F   | G  | I   | F     | N     | -   | N   | G | H | --- | L   | F   | I   | R  | D  | A | S | A  | L  | G  | V | I | D  | R  | Q | E | G | S | Q | A | --- | A   | S   | G |   |
| EcabaDIA1R | 276 | ESL | R        | S   | N    | D     | L      | N     | Y     | F    | F   | Y   | F    | T    | H | V   | D    | A   | G   | M   | F   | G  | I   | F     | N     | -   | N   | G | H | --- | L   | F   | I   | R  | D  | A | S | T  | L  | G  | V | I | D  | R  | Q | E | G | S | Q | A | --- | A   | A   | R |   |
| DordiDIA1R | 276 | ESL | R        | S   | N    | D     | L      | N     | Y     | F    | F   | Y   | F    | T    | H | V   | D    | A   | A   | M   | F   | G  | I   | F     | S     | -   | N   | G | H | --- | L   | F   | I   | R  | D  | A | S | A  | L  | G  | V | I | D  | K  | Q | E | G | S | Q | A | --- | A   | P   | K |   |
| MdomeDIA1R | 275 | D   | S        | L   | R    | N     | D      | L     | N     | Y    | F   | F   | Y    | F    | T | R   | I    | D   | A   | G   | T   | F  | G   | I     | F     | D   | -   | N | G | H   | --- | L   | F   | I  | R  | D | A | S  | T  | V  | G | V | I  | D  | K | Q | R | G | S | L | T   | --- | L   | D | R |
| OanatDIA1R | 275 | E   | F        | L   | R    | H     | N      | D     | W     | N    | Y   | F   | F    | Y    | F | T   | R    | I   | H   | A   | G   | T  | F   | G     | V     | F   | D   | - | N | G   | H   | --- | L   | F  | I  | R | D | A  | S  | S  | L | G | V  | I  | D | R | Q | E | G | K | R   | P   | --- |   |   |

AaegyDIA1 296 QKHVHSRIDCDGC-----FAYIQEDICVHQISDINLFQAVCOLLENLNGDSKRGFLHSLG  
 CpipiDIA1 299 ARNIHSRIPCDGC-----FAYVQEDLCSYQHS DINQFAICQLLYENLNGDREGGFLHIQP  
 AgambDIA1 307 THHVHSKIIECNGC-----FAYVQEDVCRYQNSDINLEATCQLLENLNGHYAKGLLHYDR  
 DyakuDIA1 264 AEKYEP-LPGE-----FTFDVSAFCSGHQLDANIYQACLLLRDYLLKLNLN-----  
 DerecDIA1 265 AEKYVP-LPGE-----FTFDVSAFCSGHQLDANIYQACLLLRDFLLKLNLDN-----  
 DmelaDIA1 267 AEKYEP-LTGE-----FTFDVSAFCSGHQLDANIYQACLLLRDYLLKLNLDN-----  
 DsechDIA1 269 AEKYEP-LAGE-----FTFDVSAFCSGHQLDANIYQACLLLRDSLLKLNLDN-----  
 DananDIA1 268 AEKYEP-LPGE-----FTFDVSAFCSGRQLDANVYQACLLLRDFLLKDLDN-----  
 DpersDIA1 268 AQKYEP-LPGDG-----FTFDVKSFCGGQQLDANVYQACLLLRKDFLLRDLAN-----  
 DpseuDIA1 268 AQKYEP-LPGDG-----FTFDVKSFCGGQQLDANVYQACLLLRKDFLLRDLAN-----  
 DwillDIA1 258 SKKYKP-FPGE-----FTYDVNAFCDNQDLANIYQVCLLRDQLLPDVKN-----  
 GaculDIA1 326 DVWYESRFEECD--REACLSFSKESLCSRVTVDHNYAVCQNLRSRYATWRGTT-----  
 OlatiDIA1 326 DVWYESRFEECD--REACLSFSKDSLCSRVTVDHNYAVCQNLRSRYATWRGTT-----  
 TnigrDIA1 326 DVWYESRFEECD--REACLSFSKDSLCSRVTVDHNYAVCQNLRSRYATWRGTT-----  
 TrubrDIA1 326 DVWYESRFEECD--REACLSFSKDSLCSRVTVDHNYAVCQNLRSRYATWRGTT-----  
 DreriDIA1b 326 DVWYESRFEECD--KEACLSFSKMDLCSRVTVDHNYAICQNLRSRYATWRGSS-----  
 DreriDIA1a 326 DVWYESRYEED--KEACLSFSKDI LCSRVTVDHNYAVCQDLRSRFSWRGST-----  
 BtaurDIA1 327 DVWYESKFDDCD--KEACLSFSKEILCARATVDHNYAVCQNLRSRHATWRGTS-----  
 PpygmDIA1 327 DVWYESKFDDCD--KEACLSFSKEILCARATVDHNYAVCQNLRSRHATWRGTS-----  
 CfamiDIA1 327 DVWYESKFDDCD--KEACLSFSKEILCARATVDHNYAVCQNLRSRHATWRGTS-----  
 TtrunDIA1 327 DVWYESKFDDCD--KEACLSFSKEILCARATVDHNYAVCQNLRSRHATWRGTS-----  
 PtrogDIA1 327 DVWYESKFDDCD--KEACLSFSKEILCARATVDHNYAVCQNLRSRHATWRGTS-----  
 HsapiDIA1 327 DVWYESKFDDCD--KEACLSFSKEILCARATVDHNYAVCQNLRSRHATWRGTS-----  
 MmulaDIA1 327 DVWYESKFDDCD--KEACLSFSKEILCARATVDHNYAVCQNLRSRHATWRGTS-----  
 PvampDIA1 327 DVWYESKFDDCD--KEACLSFSKEILCARVTVDHNYAVCQNLRSRHATWRGTS-----  
 MmuscDIA1 327 DVWYESKFDDCD--KEACLSFSKEILCARVTVDHNYAVCQNLRSRHATWRGTS-----  
 RnorvDIA1 327 DVWYESKFDDCD--KEACLSFSKEILCARVTVDHNYAVCQNLRSRHATWRGTS-----  
 MdomeDIA1 327 DVWYESKFDDCD--KEACLSFSKEILCSRATVDHNYAICQNLRSRHATWRGTS-----  
 GgallDIA1 326 DVWYESKFDDCD--KEACLSFSKEILCARVTVDHNYAVCQNLRSRHATWRGTS-----  
 XtropDIA1 326 DVWYESKFDDCD--KEACLSFSKEILCSRATVDHNYAICQNLRSRHATWRGTS-----  
 SpurpDIA1 318 DVKHQSEHEGCGS--RRECIMFSHTDL CNHYSDHNYAVCQGLFGKDSPHG--D-----  
 RnorvDIA1R 330 TGENEDIF SCL---VSGCQVQ--MSSCDTVPEKQNLVLCQQLLPQLLRG-----  
 MmuscDIA1R 330 TGENEDIF SCL---VSDCQIQ--LSSCDTVPEKQSLVLCQQLLPQLLQG-----  
 MmulaDIA1R 328 AGENKDI F SCL---VSGCQAQ--LPSCE SVSEKQSLVLCQKLLPRL LQG-----  
 HsapiDIA1R 328 AGENKDI F SCL---VSGCQAQ--LPSCE SISEKQSLVLCQKLLPRL LQG-----  
 BtaurDIA1R 328 AGDNKDI F SCL---VSGCQTK--LPSCDTIPEKQNLVLCQSVLP LLLQA-----  
 EcabaDIA1R 328 AGENKDI F SCL---LSDCQAE--LPSCDTVPEKQSLVLCQROVLP RLLQG-----  
 DordiDIA1R 328 AGENQDI F SCL---VSGCQAQL-LPSCDNIPDKQSVVLCQQLLPQLLQG-----  
 MdomeDIA1R 327 QEESKDI F SCL---VLDCQSP--FPSCSSVKEKQSVVMACQQLLPQLLKE-----  
 OanatDIA1R 327 SPEPRDI F SCL---AADCQSD--LPSCNTVQEHQSLVLCRELLPK LLEG-----  
 GgallDIA1R 325 QQEYKDI F SCL---TVDCQSA--FVSCNSIREKQSLVMVCQELLPK LLRG-----  
 DreriDIA1R 312 LPEELDV F SCL---SGSCVRP---PPCETVREAQSE ILLCKYILNLLTSN-----  
 SsalaDIA1R 332 TGSDDI F SCLGQGTSPGCHRS---PPCSSVRPTQSLTLLCTALLP RLLTERGA-----  
 NvitrDIA1 299 ESWNETY TNVAVDLCQDC FVFPNDICSHKVS DHNYAICQHIL TQALGAVFHN-----  
 BflorDIA1 315 EARYSHF DECPG--MSNCLSF DVSALCRYLHTDHNYAVCRNMLSEYASEMGKP-----  
 NvectDIA1 311 N--DKPKP SDCS--QPDCLSFSPSDMCSGGSRDHNYAICQGVLAGSSRQ-----  
 CinteDIA1 340 Y--EVRYKQEK-----VDITEENL CDHSENDVNYVICRHFLGGTWKERK GK-----  
 consensus 361 yesrf aclsf ic ld nyavCqnll r

|            |     |                                                              |
|------------|-----|--------------------------------------------------------------|
| AaegyDIA1  | 351 | TDS---KLEAFRKLH-----QCVCQPPYCED-----RQEVLRQIMEI              |
| CpipiDIA1  | 354 | NDDSQPRLSEIRQLLH-----HCVCVFPDCRD-----ROGLLQQVQEI             |
| AgambDIA1  | 362 | DAEAFPVLGEASKMLQN-----LLSECVYQPEDCQN-----RSHILKDMLEHI        |
| DyakuDIA1  | 310 | -----ERLQLLLE-----QCVCQDDFCDM-----RFQHAYDLIKM                |
| DerecDIA1  | 311 | -----ERLQLLLE-----QCVCQDDFCDM-----RFQHAYDLIKV                |
| DmelaDIA1  | 313 | -----EKLQLLLE-----QCVCQDDFCDM-----RFQHAYDLIKV                |
| DsechDIA1  | 315 | -----EKLQLLLE-----QCVCQDDFCDM-----RFQHAYDLIKE                |
| DananDIA1  | 314 | -----ERLQLLLE-----KCVQCQDDLCDM-----RFQYAYDLIKL               |
| DpersDIA1  | 314 | -----GRLEMLLE-----QCVCDDATCDM-----RFQQAAYDLIKL               |
| DpseuDIA1  | 314 | -----GRLEMLLE-----QCVCDDATCDM-----RFQQAAYDLIKL               |
| DwillDIA1  | 304 | -----HRLKEMLN-----DCVQCEDDKCDI-----RFKYANNLIDL               |
| GaculDIA1  | 378 | ---GGLLHDPPAHTAK---DGQLLTLLEDECTREPKKRY-G-----RFQAAKELREY    |
| OlatiDIA1  | 378 | ---GGLLHDPPAHTAK---DGQLEALLDECTREPKKRY-G-----RFQAAKELREY     |
| TnigrDIA1  | 378 | ---GGLLHDPPAHTAK---DGQLEALLDECTKPKKRY-G-----RFQAAKELREY      |
| TrubrDIA1  | 378 | ---GGLLHDPPAHTAK---DGQLEALLDECTKPKKRF-G-----RFQAAKELREY      |
| DreriDIA1b | 378 | ---GGLLHDPPEHTAK---DGQLEALLEECANPKKRY-G-----RFQAAKELRDY      |
| DreriDIA1a | 378 | ---GGLLHDPPEVVK---DGRLEALLDECTREPKKRY-G-----RFQAAKELREF      |
| BtaurDIA1  | 379 | ---GGLLHDPPEHTAK---DGRLEALLDECANPKKRY-G-----RFQAAKELREY      |
| PpygmDIA1  | 379 | ---GGLLHDPPEHTAK---DGRLEALLDECANPKKRY-G-----RFQAAKELREY      |
| CfamiDIA1  | 379 | ---GGLLHDPPEHTAK---DGRLEALLDECANPKKRY-G-----RFQAAKELREY      |
| TtrunDIA1  | 379 | ---GGLLHDPPEHTAK---DGRLEALLDECANPKKRY-G-----RFQAAKELREY      |
| PtrogDIA1  | 379 | ---GGLLHDPPEHTAK---DGRLEALLDECANPKKRY-G-----RFQAAKELREY      |
| HsapiDIA1  | 379 | ---GGLLHDPPEHTAK---DGRLEALLDECANPKKRY-G-----RFQAAKELREY      |
| MmulaDIA1  | 379 | ---GGLLHDPPEHTAK---DGRLEALLDECANPKKRY-G-----RFQAAKELREY      |
| PvampDIA1  | 379 | ---GGLLHDPPEHTAK---DGRLEALLDECANPKKRY-G-----RFQAAKELREY      |
| MmuscDIA1  | 379 | ---GGLLHDPPEHTAK---DGRLEALLDECTNEPKKRY-G-----RFQAAKELRGY     |
| RnorvDIA1  | 379 | ---GGLLHDPPEHTAK---DGRLEALLDECTNEPKKRY-G-----RFQAAKELRGY     |
| MdomeDIA1  | 379 | ---GGLLHDPPEHTAK---DGRLEALLDECAHPKRF-G-----RFQAAKELREY       |
| GgallDIA1  | 378 | ---GGLLHDPPEHTAK---DGRLEALLDECANPKKRY-G-----RFQAAKELREY      |
| XtropDIA1  | 378 | ---GGLLHDPPEHTAK---DGRLEALLDECANPKKRY-G-----RFKSAKELREY      |
| SpurpDIA1  | 369 | ---GGLLHSTPSDLSY-MRAKVKGQIAECRSESKRD-G-----RYLVVKELKET       |
| RnorvDIA1R | 375 | ---KFPSPVQVEIDS-----ALSLSCKDASTNLE-----VFGATSLKNI            |
| MmuscDIA1R | 375 | ---KFPSPVQVEIDS-----ALSLSCKDNSTDLE-----VLGATSWLKDI           |
| MmulaDIA1R | 373 | ---RFPSPVQDDIDS-----ALAQCQDSTRPDPE-----VLGAASWLKHI           |
| HsapiDIA1R | 373 | ---RFPSPVQDDIDS-----ILVQCQDSIRPDPE-----VLGAASQLKDI           |
| BtaurDIA1R | 373 | ---KFPSPVQVEIDA-----ELTRCADGTRPDPE-----VLGAASRLKDI           |
| EcabaDIA1R | 373 | ---KFPSPVQVEIDA-----TLTWCGEDTRPDAE-----VLGAASRLKDI           |
| DordiDIA1R | 374 | ---KFPSPVQVEIDS-----ALAQCQGIRPDSE-----VFGAASRLKDI            |
| MdomeDIA1R | 372 | ---KFPQPIQEIDS-----ALVLCQNSLSDQE-----VIEAASRLKAI             |
| OanatDIA1R | 372 | ---KFPKPVQEIDA-----LLDRCQDSSLDGQT-----VIGGARRLMDI            |
| GgallDIA1R | 370 | ---KFLPPVQEKIDS-----FLQHCAEGLADDQD-----VNEAMAKLAQL           |
| DreriDIA1R | 357 | ---DKQSGLEPRAAVD-----ELLCVCAQDFSQLDQT-----IKSVQSLKNI         |
| SsalaDIA1R | 383 | ---QTTRLPMEGAEAGRLARDVPLLLGVCADFSQPDWR-----IMAAVGSIMDL       |
| NvitrDIA1  | 353 | ---QGFLHDPDYILQK---HPTLIDLLEQCAKEDIGY-S-----RIDIAHKLIVL      |
| BflorDIA1  | 368 | ---GGLLHDPPEVVR---DGTLQRLLECAKERTLYG-----RFDAAKELIEL         |
| NvectDIA1  | 358 | ---GGLLHNPVALKAS---LNQLLQDCTAQDMRN-T-----REETAQKLSL          |
| CinteDIA1  | 385 | K-YPGGLLHDPKEFGVFS---SQMFVLLDICSRGKTAVAPERRTLSHSIRRLAANQLRNV |
| consensus  | 421 | gvlhe p di 1 ll Ca p k rfqaakdlrei                           |



|            |     |       |                                  |
|------------|-----|-------|----------------------------------|
| AaegyDIA1  | 387 | IHDV  | LHEVV-----                       |
| CpipiDIA1  | 393 | IDG   | ILVES-----                       |
| AgambDIA1  | 405 | IDQT  | I IQS-----                       |
| DyakuDIA1  | 341 | LDSKN | -----                            |
| DerecDIA1  | 342 | LDSKI | -----                            |
| DmelaDIA1  | 344 | LESNN | -----                            |
| DsechDIA1  | 346 | LESKN | -----                            |
| DananDIA1  | 345 | LDS   | -----                            |
| DpersDIA1  | 345 | LGEL  | L LGS-----                       |
| DpseuDIA1  | 345 | LGEL  | L LGS-----                       |
| DwillDIA1  | 335 | LVE   | INN KIEIL-----                   |
| GaculDIA1  | 421 | LTQL  | AAASSS ATAR-----                 |
| OlatiDIA1  | 421 | LTKL  | AAASSS ATSR-----                 |
| TnigrDIA1  | 421 | LTQL  | A-----                           |
| TrubrDIA1  | 421 | LTQL  | AASSSS LVSAR-----                |
| DreriDIA1b | 421 | LTQL  | SGSAR-----                       |
| DreriDIA1a | 421 | LTQL  | TQTSNADR-----                    |
| BtaurDIA1  | 422 | LAQL  | SNNVR-----                       |
| PpygmDIA1  | 422 | LAQL  | SNNVR-----                       |
| CfamiDIA1  | 422 | LAQL  | SNNVR-----                       |
| TtrunDIA1  | 422 | LAQL  | SNNVR-----                       |
| PtrogDIA1  | 422 | LAQL  | SNNVR-----                       |
| HsapiDIA1  | 422 | LAQL  | SNNVR-----                       |
| MmulaDIA1  | 422 | LAQL  | SNNVR-----                       |
| PvampDIA1  | 422 | LAQL  | SNNVR-----                       |
| MmuscDIA1  | 422 | LAQL  | SHNVR-----                       |
| RnorvDIA1  | 422 | LAQL  | SHNVR-----                       |
| MdomeDIA1  | 422 | LAQL  | SNNGR-----                       |
| GgallDIA1  | 421 | LAQL  | SNNVR-----                       |
| XtropDIA1  | 421 | LAQL  | SNNAR-----                       |
| SpurpDIA1  | 414 | LMKL  | IT-----                          |
| RnorvDIA1R | 412 | LRSL  | RTCDPRFAYRYP DCKYNDRF-----       |
| MmuscDIA1R | 412 | LRSL  | RTCDPRFAYRYP DCKYNDRF-----       |
| MmulaDIA1R | 410 | LRPL  | RTCDSRFAYRYP DCKYNDKF-----       |
| HsapiDIA1R | 410 | LRPL  | RTCDSRFAYRYP DCKYNDKF-----       |
| BtaurDIA1R | 410 | LRPL  | RTCDPRFAYRYP DCKYDDKF-----       |
| EcabaDIA1R | 410 | LRPL  | RTCDPRFAYRYP DCKYNDKF-----       |
| DordiDIA1R | 411 | LRPL  | RTCDPRFAYRYP DCKYNDRF-----       |
| MdomeDIA1R | 409 | LKPL  | RTCDPRYAYRYP DCKYSDRY-----       |
| OanatDIA1R | 409 | LKSL  | RTCDARFAYRYP DCKYSEKY-----       |
| GgallDIA1R | 407 | LKPL  | RSCDSRFAYRYP DCKYSDKY-----       |
| DreriDIA1R | 394 | LKTL  | RPCSPQYAYRYPECLYSDKF-----        |
| SsalaDIA1R | 430 | LKPM  | RPCNPHYTYRYPECRYNQDY-----        |
| NvitrDIA1  | 397 | LDS   | VIKNA-----                       |
| BflorDIA1  | 411 | LG    | SFLKDR-----                      |
| NvectDIA1  | 398 | LQ    | GYL-----                         |
| CinteDIA1  | 441 | LERR  | ICSPDFKYRYPECELAEDAGINLPSIELQWLH |
| consensus  | 481 | 1     | 1                                |
