# Supplementary material for: Characterization of the Deleted in Autism 1 Protein Family: Implications for Studying Cognitive Disorders
Source: PubMed Central journal article supplement (PMC3023760; doi:10.1371/journal.pone.0014547), 2011-01-19

Fig. S5

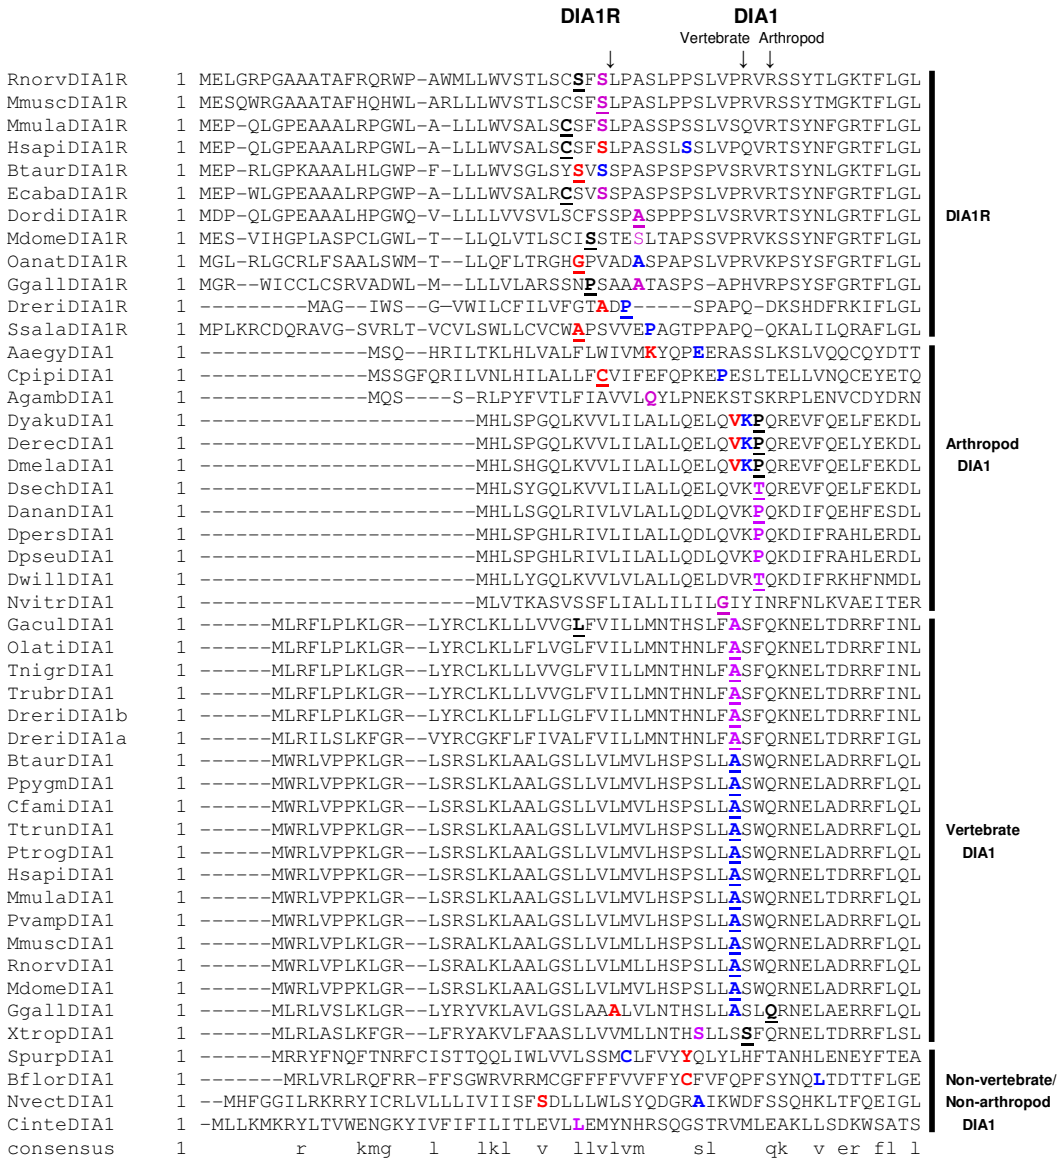

Supplement: pone.0014547.s015.pdf [file pone.0014547.s015.pdf]
