# Supplementary material for: Characterization of the Deleted in Autism 1 Protein Family: Implications for Studying Cognitive Disorders
Source: PubMed Central journal article supplement (PMC3023760; doi:10.1371/journal.pone.0014547), 2011-01-19
Supplement: pone.0014547.s017.pdf [file pone.0014547.s017.pdf]

**Fig. S7**

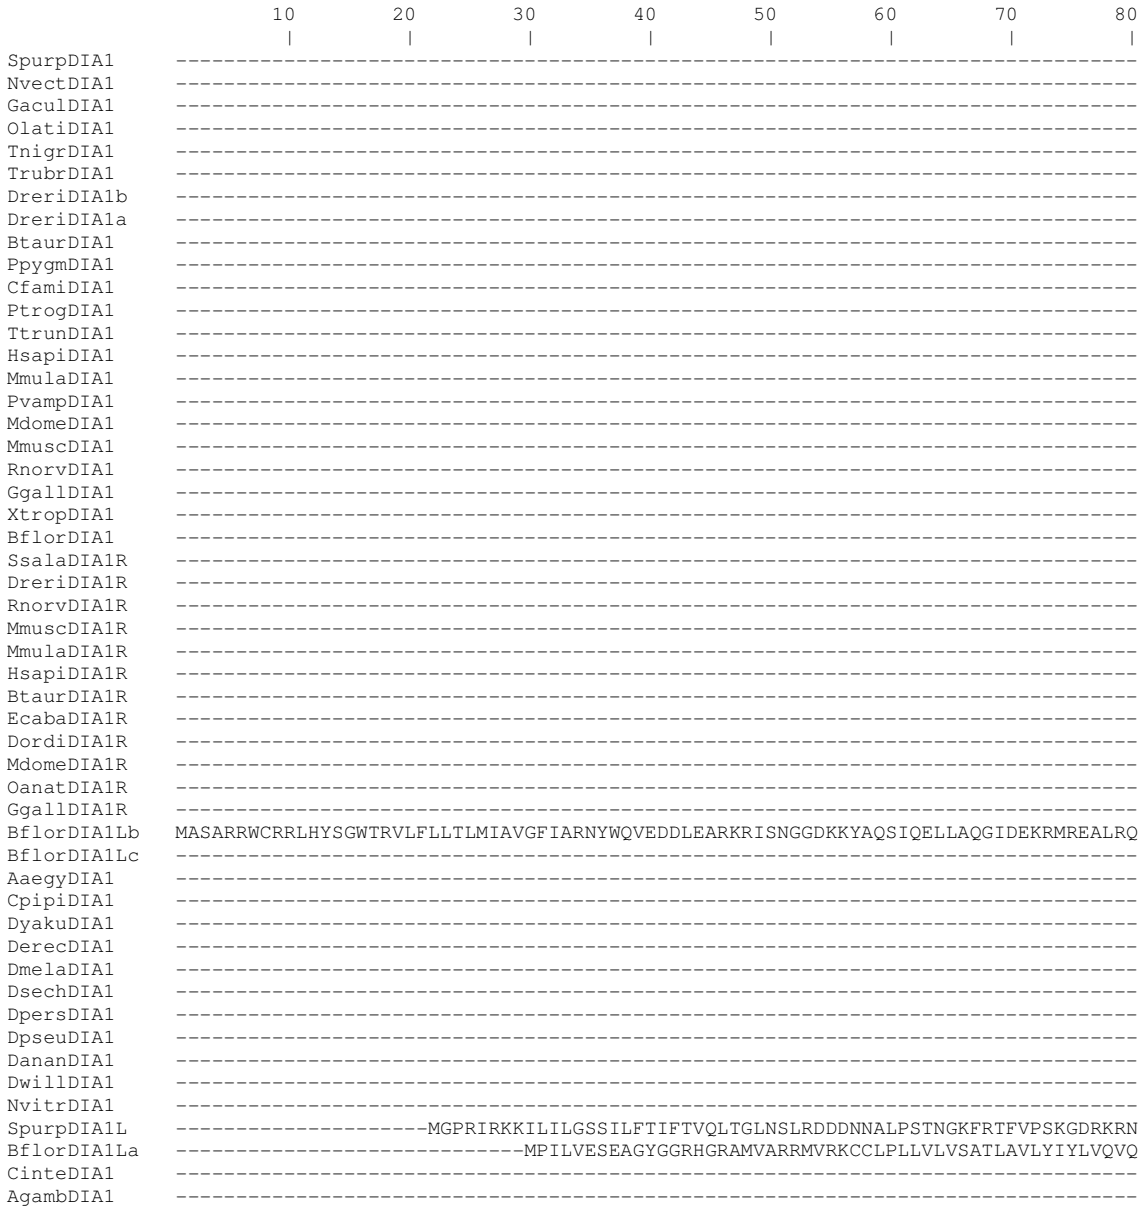

|             | 90                         | 100        | 110            | 120         | 130       | 140        | 150   | 160        |
|-------------|----------------------------|------------|----------------|-------------|-----------|------------|-------|------------|
| SpurpDIA1   | -----MRRYFNQFTNRF          | CISTQQLIWL | VVLSMCLFV      | YQ-----     | LYLHFTANH | LENEYFTEAT | ----- |            |
| NvectDIA1   | -----MHFGGILRKR            | RYICRLVLL  | LVIIISFSD      | LLWLSYQD    | GRAIKWDF  | SSQHKLTFQ  | EIGLN | -----      |
| GaculDIA1   | -----MLRFLPL-<br>KLGRLYRCL | KLLLVVGL   | FVILLM         | NTHS----    | LFASFQK   | NELTDRRF   | INLN  | -----      |
| OlatiDIA1   | -----MLRFLPL-<br>KLGRLYRCL | KLLFLVGL   | FVILLM         | NTHN----    | LFASFQK   | NELTDRRF   | INLN  | -----      |
| TnigrDIA1   | -----MLRFLPL-<br>KLGRLYRCL | KLLLVVGL   | FVILLM         | NTHN----    | LFASFQK   | NELTDRRF   | INLN  | -----      |
| TrubrDIA1   | -----MLRFLPL-<br>KLGRLYRCL | KLLLVVGL   | FVILLM         | NTHN----    | LFASFQK   | NELTDRRF   | INLN  | -----      |
| DreriDIA1b  | -----MLRFLPL-<br>KLGRLYRCL | KLLFLLGL   | FVILLM         | NTHN----    | LFASFQK   | NELTDRRF   | INLN  | -----      |
| DreriDIA1a  | -----MLRILSL-<br>KFGRVYRC  | GKFLFIV    | ALFVILL        | MNTHN----   | LFASFQ    | RNELTDRRF  | I     | GLN        |
| BtaurDIA1   | -----MWRLVPP-<br>KLGRLSR   | SLKLAAL    | GSLLVLM        | VHSPS----   | LLASWQ    | RNELADR    | RF    | LQLN       |
| PpygmDIA1   | -----MWRLVPP-<br>KLGRLSR   | SLKLAAL    | GSLLVLM        | VHSPS----   | LLASWQ    | RNELADR    | RF    | LQLN       |
| CfamiDIA1   | -----MWRLVPP-<br>KLGRLSR   | SLKLAAL    | GSLLVLM        | VHSPS----   | LLASWQ    | RNELADR    | RF    | LQLN       |
| PtrogDIA1   | -----MWRLVPP-<br>KLGRLSR   | SLKLAAL    | GSLLVLM        | VHSPS----   | LLASWQ    | RNELADR    | RF    | LQLN       |
| TtrunDIA1   | -----MWRLVPP-<br>KLGRLSR   | SLKLAAL    | GSLLVLM        | VHSPS----   | LLASWQ    | RNELADR    | RF    | LQLN       |
| HsapiDIA1   | -----MWRLVPP-<br>KLGRLSR   | SLKLAAL    | GSLLVLM        | VHSPS----   | LLASWQ    | RNELADR    | RF    | LQLN       |
| MmuladIA1   | -----MWRLVPP-<br>KLGRLSR   | SLKLAAL    | GSLLVLM        | VHSPS----   | LLASWQ    | RNELADR    | RF    | LQLN       |
| PvpamDIA1   | -----MWRLVPP-<br>KLGRLSR   | SLKLAAL    | GSLLVLM        | VHSPS----   | LLASWQ    | RNELADR    | RF    | LQLN       |
| MdomeDIA1   | -----MWRLVPP-<br>KLGRLSR   | SLKLAAL    | GSLLVLM        | VHSPS----   | LLASWQ    | RNELADR    | RF    | LQLN       |
| MmuscdIA1   | -----MWRLVPL-<br>KLGRLSR   | ALKLAAL    | GSLLVML        | LHSPS----   | LLASWQ    | RNELADR    | RF    | LQLN       |
| RnorvDIA1   | -----MWRLVPL-<br>KLGRLSR   | ALKLAAL    | GSLLVML        | LHSPS----   | LLASWQ    | RNELADR    | RF    | LQLN       |
| GgallDIA1   | -----MLRLVSL-<br>KLGRLYR   | VKLAAL     | GSLLAAL        | VLNTHS----  | LLASLQ    | RNELAER    | RF    | LQLN       |
| XtropDIA1   | -----MLRLASL-<br>KFGRLF    | RYAKVLF    | AASLLV         | MLLNTHS---- | LLSSFQ    | RNELTDRR   | F     | LSLN       |
| BflorDIA1   | -----MRLVRLR               | QFRFFSG    | WRVRRM         | CGFFFF      | VVFFYCF   | -----      |       |            |
| SsalaDIA1R  | ----MPL--K                 | RCQRAVG    | SVRLT--        | VCVLSW      | LLCVCW    | APSVV      | E     | PACT       |
| DreriDIA1R  | -----MAG-----              | IWSGV      | WILCF          | ILVFG       | TADPS---- | PAPQDK     | SH    | DFRKIFLGLD |
| RnorvDIA1R  | ----MELGR                  | PAAATAF    | RQRP           | AWMLL       | WVSTL     | SCSFL      | P     | ASLPPSL    |
| MmuscdIA1R  | ----MESQ                   | WRGAAAT    | AFHQ           | HLAR        | LLLV      | WVSTL      | SCS   | FLP        |
| MmuladIA1R  | ----MEP-<br>QLGPE          | AAALR      | PGWLA-<br>LLLW | V           | SAL       | SCSFL      | P     | ASSPSSL    |
| HsapiDIA1R  | ----MEP-<br>QLGPE          | AAALR      | PGWLA-<br>LLLW | V           | SAL       | SCSFL      | P     | ASSLSSL    |
| BtaurDIA1R  | ----MEP-<br>RLGP           | KAAAL      | H              | L           | G         | W          | P     | F          |
| EcabaDIA1R  | ----MEP-<br>WLGP           | EAAAL      | R              | P           | G         | W          | P     | A          |
| DordiDIA1R  | ----MDP-<br>QLGPE          | AAALH      | P              | G           | W         | Q          | V     | L          |
| MdomeDIA1R  | ----MES-<br>VIH            | G          | P              | L           | A         | S          | P     | C          |
| OanatDIA1R  | ----MGL-<br>RLG            | C          | R              | L           | F         | S          | A     | L          |
| GgallDIA1R  | ----MGR--<br>WIC           | C          | S              | R           | V         | A          | D     | W          |
| BflorDIA1Lb | KAE                        | E          | V              | H           | R         | I          | V     | K          |
| BflorDIA1Lc | -----                      |            |                |             |           |            |       |            |
| AaegyDIA1   | -----MSQHR                 | ILTKL      | H              | V           | A         | L          | F     | W          |
| CpipiDIA1   | -----MSSGF                 | Q          | R              | I           | L         | V          | N     | L          |
| DyakuDIA1   | -----MHLSP                 | Q          | L              | K           | V         | V          | L     | I          |
| DerecDIA1   | -----MHLSP                 | Q          | L              | K           | V         | V          | L     | I          |
| DmeladIA1   | -----MHLSP                 | Q          | L              | K           | V         | V          | L     | I          |
| DsechDIA1   | -----MHLSP                 | Q          | L              | K           | V         | V          | L     | I          |
| DpersDIA1   | -----MHLSP                 | G          | H              | L           | R         | I          | V     | L          |
| DpseuDIA1   | -----MHLSP                 | G          | H              | L           | R         | I          | V     | L          |
| DananDIA1   | -----MHLSP                 | G          | H              | L           | R         | I          | V     | L          |
| DwillDIA1   | -----MHLLY                 | Q          | L              | K           | V         | V          | L     | I          |
| NvitrDIA1   | -----MLV                   | T          | K              | A           | S         | V          | S     | F          |
| SpurpDIA1L  | LLH                        | A          | G              | Q           | G         | K          | E     | L          |
| BflorDIA1La | GSP                        | P          | W              | S           | L         | G          | S     | Q          |
| CinteDIA1   | -----MLL                   | K          | M              | K           | R         | Y          | L     | T          |
| AgambDIA1   | -----MQSS                  | R          | L              | P           | Y         | F          | V     | T          |

|             | 170            | 180                                                                       | 190   | 200                                         | 210                                         | 220                     | 230                   | 240 |
|-------------|----------------|---------------------------------------------------------------------------|-------|---------------------------------------------|---------------------------------------------|-------------------------|-----------------------|-----|
| SpurpDIA1   | KCPACFGT       | --SLCKRFRSRGDYRFHSYSSIR                                                   | ----- | LFDYVN-VKNVYFATYLD                          | ----                                        | QKP-VVMKKLGHNSEHNQFDK   |                       |     |
| NvectDIA1   | KCPACFGINLSI   | CHKLLGGGVTVKSN                                                            | ---T  | -----                                       | PWSEER-IGKVSYGLWGA                          | ----                    | VKQRVVLKTLTGSSELTAFDN |     |
| GaculDIA1   | KCPACFGT       | --SWCRKFMNGQVSFETWGRRL                                                    | ----- | FLDVFN-VKNVYFAQYGEPREGTRR                   | ----                                        | VVLKRLGNSQELAEIDQ       |                       |     |
| OlatiDIA1   | KCPACFGT       | --SWCRKFMNGQVSFETWGRRL                                                    | ----- | FLDVFN-VKNVYFAQYGEPREGTRR                   | ----                                        | VVLKRLGNSQELAEIDQ       |                       |     |
| TnigrDIA1   | KCPACFGT       | --SWCRKFMNGQVSFETWGRRL                                                    | ----- | FLDVFN-VKNVYFAQYGEPREGTRR                   | ----                                        | VVLKRLGNSQELADIDQ       |                       |     |
| TrubrDIA1   | KCPACFGT       | --SWCRKFMNGQVSFETWGRRL                                                    | ----- | FLDVFN-VKNVYFAQYGEPREGTRR                   | ----                                        | VVLKRLGNSQELADIDQ       |                       |     |
| DreridDIA1b | KCPACFGT       | --SWCRKFMNGQISFETWGRRL                                                    | ----- | FLDVFN-VKNVFFAQYGEPREGTRR                   | ----                                        | IVLKRLGNSQELADIDQ       |                       |     |
| DreridDIA1a | KCPACFGT       | --SWCRKFMNGQVTFEMWGRRL                                                    | ----- | FLDFFN-VKNVFFAQYGEPREGTRR                   | ----                                        | VVLKRLGNSQELAEIDQ       |                       |     |
| BtaurDIA1   | KCPACFGT       | --SWCRRFLNGQVVFEEAWGRRL                                                   | ----- | LLDFLN-VKNVYFAQYGEPREGRRRVVLKRLGSQRELAQLDQ  |                                             |                         |                       |     |
| PpygmDIA1   | KCPACFGT       | --SWCRRFLNGQVVFEEAWGRRL                                                   | ----- | LLDFLN-VKNVYFAQYGEPREGRRRVVLKRLGSQRELAQLDQ  |                                             |                         |                       |     |
| CfamIDIA1   | KCPACFGT       | --SWCRRFLNGQVVFEEAWGRRL                                                   | ----- | LLDFLN-VKNVYFAQYGEPREGRRRVVLKRLGSQRELAQLDQ  |                                             |                         |                       |     |
| PtrogDIA1   | KCPACFGT       | --SWCRRFLNGQVVFEEAWGRRL                                                   | ----- | LLDFLN-VKNVYFAQYGEPREGRRRVVLKRLGSQRELAQLDQ  |                                             |                         |                       |     |
| TtrunDIA1   | KCPACFGT       | --SWCRRFLNGQVVFEEAWGRRL                                                   | ----- | LLDFLN-VKNVYFAQYGEPREGRRRVVLKRLGSQRELAQLDQ  |                                             |                         |                       |     |
| HsapiDIA1   | KCPACFGT       | --SWCRRFLNGQVVFEEAWGRRL                                                   | ----- | LLDFLN-VKNVYFAQYGEPREGRRRVVLKRLGSQRELAQLDQ  |                                             |                         |                       |     |
| MmuladDIA1  | KCPACFGT       | --SWCRRFLNGQVVFEEAWGRRL                                                   | ----- | LLDFLN-VKNVYFAQYGEPREGRRRVVLKRLGSQRELAQLDQ  |                                             |                         |                       |     |
| PvpamDIA1   | KCPACFGT       | --SWCRRFLNGQVVFEEAWGRRL                                                   | ----- | LLDFLN-VKNVYFAQYGEPREGRRRVVLKRLGSQRELAQLDQ  |                                             |                         |                       |     |
| MdomeDIA1   | KCPACFGT       | --SWCRRFLNGQVVFEEAWGRRL                                                   | ----- | LLDFLN-VKNVYFAQYGEPREGRRRVVLKRLGSQRELAQLDQ  |                                             |                         |                       |     |
| MmuscdDIA1  | KCPACFGT       | --SWCRRFLNGQVGFETWGRRL                                                    | ----- | LLDFLN-VKNVYFAQYGEPREGRRRVVLKRLGSQRELAQLDQ  |                                             |                         |                       |     |
| RnorvDIA1   | KCPACFGT       | --SWCRRFLNGQVGFETWGRRL                                                    | ----- | LLDFLN-VKNVYFAQYGEPREGRRRVVLKRLGSQRELAQLDQ  |                                             |                         |                       |     |
| GgallDIA1   | KCPACWGT       | --SWCRKFLNGQLRLESWGRRL                                                    | ----- | LFDFFN-VKNVYFARYGEPREGSRR                   | ----                                        | VVLKRLGSAQELADIDA       |                       |     |
| XtropDIA1   | KCPACFGT       | --SWCRKFMNGQLSFEWGRRL                                                     | ----- | LLDFFN-VKNVHFAQYGEPREGSRR                   | ----                                        | VVLKRLGNSHELSELDQ       |                       |     |
| BflorDIA1   | KCPACFGT       | --DLCEEFENKILFKYSSRL                                                      | ----- | ILDIFN-IKNVYFAIY                            | ----                                        | EGME--VALKRLGHNSEFDQLDR |                       |     |
| SsalaDIA1R  | KCNACVGT       | --SICKKLLKQIRFDWWMSPD                                                     | ----- | TTLPLA-EKQSFPGNLTDSDLSWRP                   | ----                                        | VVLSFLSSPCLHSSSDR       |                       |     |
| DreridDIA1R | KCNACIGT       | --SICKKFFKDEIRFERRLTAQ                                                    | ----- | SNLSSA-DVRSYEGNYTDSTAGWRP                   | ----                                        | VVVSRLMSPHLHLQSLDN      |                       |     |
| RnorvDIA1R  | KCNACIGT       | --SICKKFFKKEIRLDNSLVSH                                                    | ----- | LGLPSQ-DLLSYAANYSDDSKTWRP                   | ----                                        | VEISRLVSKYQSEISDK       |                       |     |
| MmuscdDIA1R | KCNACIGT       | --SICKKFFKKEIRFDNSLASH                                                    | ----- | LGLPPQ-DLHSYAANYSDDSKTWRP                   | ----                                        | VEISQLVSRVQIEISDR       |                       |     |
| MmuladDIA1R | KCNACIGT       | --SICKKFFKKEIRSDNWLASH                                                    | ----- | LGLPPD-FLLSYFANYSDDSKIWRP                   | ----                                        | VEIFRLVSNYQNEISDR       |                       |     |
| HsapiDIA1R  | KCNACIGT       | --SICKKFFKKEIRSDNWLASH                                                    | ----- | LGLPPD-SLLSYFANYSDDSKIWRP                   | ----                                        | VEIFRLVSKYQNEISDR       |                       |     |
| BtaurDIA1R  | KCNACIGT       | --SICKKFFKKEIRFDNGLALH                                                    | ----- | LGPDPD-DLPSYSANYSDDFKTWRP                   | ----                                        | VEISRLVSKQNKISDG        |                       |     |
| EcabaDIA1R  | KCNACIGT       | --SICKKFFKKEIRFDNRLASH                                                    | ----- | LGLPSG-YLPSYSANYSDDSKTWRP                   | ----                                        | VEVSRLVSKQNEISDR        |                       |     |
| DordiDIA1R  | KCNACIGT       | --SICKKFFKKEIRFDNSLASD                                                    | ----- | LELASD-YLPSYSANYSDDSKTWRP                   | ----                                        | VEIFRLVSKQEONEISDR      |                       |     |
| MdomeDIA1R  | KCNACIGT       | --SICKKFFKKEIRFDNWLASH                                                    | ----- | LKLPPD-YFSTYPANYSDDTKSWRP                   | ----                                        | VEISRLISKYQHELSDR       |                       |     |
| OanatDIA1R  | KCNACIGT       | --SICKKFFKKEIRFDNWPASH                                                    | ----- | LKPPPD-HFPGYSANYTDDSKSWRL                   | ----                                        | VEISRLIGKDQNELSDQ       |                       |     |
| GgallDIA1R  | KCNACIGT       | --SICKKFFKKEIRFDTWLSSH                                                    | ----- | LKLPPS-YLLSYLGNYTDDAQSWRM                   | ----                                        | VDI TRLT TTKYQHADRADQ   |                       |     |
| BflorDIA1Lb | KCPACYGES      | --LCEQAEVG-LITMDVADKT                                                     | ----- | LEHKG--VYFGHFRNT                            | ----                                        | E---VVAKRLVGKDGWTRFDE   |                       |     |
| BflorDIA1Lc | KCPACFGD       | --KCELLRRGHFVKVDSSEDR                                                     | ----- | YMKKGI-VSTGRIGGV                            | ----                                        | K---VIAKSMNEAGAWQRYER   |                       |     |
| AaegyDIA1   | LCPGCFPRP      | --VNCSEFFENLKSIDS                                                         | ----- | NE-----                                     | LFELL-THFNQHGVRVYGLSGSEQRVVIKLNKKEHGVLEIS   |                         |                       |     |
| CpιδDIA1    | LCPECFVSPVTC   | GHANFVTIDS                                                                | ----  | SN-----                                     | PWNQLT-CRYNPHGVSYG-LLGSGQKVVIKTLNKNRAVEALRD |                         |                       |     |
| DyakuDIA1   | LCPNCFVGGREL   | CGEIFQKIAEPSDW                                                            | --SK  | -----                                       | LLKAIS-LLVDRRAIYFLRFKDDQD                   | ----                    | VVAKRKIIDAQNQ         |     |
| DerecDIA1   | LCPDCFVGGQSEL  | CVGIFQKIAEPSDW                                                            | --SK  | -----                                       | LLKAIS-LIVDRRAIYFLRLKDDAQD                  | ----                    | VVAKRKIIDARNH         |     |
| DmeladDIA1  | LCPDCFVGGQSEPC | GEIFQKIAEPSDW                                                             | --SR  | -----                                       | LVKAIS-LLVDRRAIYFLRLKDRDQEV                 | Q--                     | LVAKRKIIDAQSN         |     |
| DsechDIA1   | LCPDCFVGGQKEQ  | CGEIFQKIAEPSDW                                                            | --SR  | -----                                       | LVKAIS-LLVDRRAIHYLRLKDDQAV                  | Q--                     | LVAKRKIINAHSY         |     |
| DpersDIA1   | LCPACFAGQRWQ   | CEEIFEAIAPSDW                                                             | --SK  | -----                                       | LLKGIA-LLIDRREIYFLQLNERHQAA                 | Q--                     | LVAKRDAIGGHSY         |     |
| DpseudDIA1  | LCPACFAGQRWQ   | CEEIFEAIAPSDW                                                             | --SK  | -----                                       | LLKGIA-LLIDRREIYFLQLNERHQAA                 | Q--                     | LVAKRDAIGGHSY         |     |
| DananDIA1   | LCPACFSAQREQC  | EEVFRAIREPSDL                                                             | --SK  | -----                                       | LWKAVT-LLFDRREIFWLEIGPSQEKSSQ               | ----                    | LLAKRKSIVASHQ         |     |
| DwillDIA1   | ECPQCLGQREQC   | EKFDTIEEPAKL                                                              | --DR  | -----                                       | LWKDLT-LLVDPREIYWLELNENREN                  | --VK                    | CLAKRKMTRKISK         |     |
| NvitrDIA1   | KCPACFGD       | --SMCQVIDSNEISFEYTDfYS                                                    | ----- | IFNNLFVKNVYYGKYD                            | ----                                        | KKVIMKKLAQSEELKTFDE     |                       |     |
| SpurpDIA1L  | RCPLCYGT       | --TNCQDIYAGNISFHVG                                                        | ----  | S-----                                      | VNLSEP---HAIRGTWGD                          | ----                    | RRIVGKRLVSRVFERLEK    |     |
| BflorDIA1La | PCPACLGD       | --NLCEEFEDGMIDLG                                                          | ----- | SEVTSWKVKAYTGTWD                            | ----                                        | KVEVMVTQCASEERLERFEE    |                       |     |
| CintedDIA1  | GNFSCFGT       | --SLCKNRNRVGLSEDVPTLRSGWLSIYGELVDLHRVKLNVTYKLPSTLPCNGETCSVQIETSVLGSGNNVNK |       |                                             |                                             |                         |                       |     |
| AgambDIA1   | LCPECVSSG      | --LECNKFDLFTLQDDN                                                         | ----- | VFNIIN-NIFNSHTTRIGTIVQENKLAVMKHLNRDNTIEKLLQ |                                             |                         |                       |     |

\* \*

|             | 250       | 260      | 270                  | 280         | 290         | 300           | 310        | 320         |                          |             |           |           |                |      |        |
|-------------|-----------|----------|----------------------|-------------|-------------|---------------|------------|-------------|--------------------------|-------------|-----------|-----------|----------------|------|--------|
| SpurpDIA1   | DLCTNAES  | -GLRGCDV | SQQIYKSKLS           | -----       | DIMYAE      | RLEEKDVMG     | ---L-      | SDIVRCPSRRL | LDRIWDTFGERQFDKS-        |             |           |           |                |      |        |
| NvectDIA1   | EICRGV    | GK-DSN   | -CKISQEA             | WDS-----    | DVLV        | PKPPLQDAVR    | -----      | KYFDCP      | STRFLEKIESVYG-QETPGQ-    |             |           |           |                |      |        |
| GaculDIA1   | KICKRATG  | -RPR-    | CDLIQAMYKTEFA        | -----       | RINGDV      | RLLTPEVVEG    | --W-       | SDLVHC      | PSQRLLDRLVRRYAETKDSGSF   |             |           |           |                |      |        |
| OlatiDIA1   | KICKRATG  | -RPR-    | CDLVQAMYKTEFA        | -----       | RINGDV      | RLLTPDVVEG    | --W-       | SDLVHC      | PSQRLLDRLVRRYAETKDSGSF   |             |           |           |                |      |        |
| TnigrDIA1   | KICKRATG  | -RPR-    | CDLIQAMYKTEFA        | -----       | RINGDV      | RLLTPDVVEG    | --W-       | SDLVHC      | PSQRLLDRLVRRYAETKDSGSF   |             |           |           |                |      |        |
| TrubrDIA1   | KICKRATG  | -RPR-    | CDLIQAMYKTEFA        | -----       | RINGDV      | RLLTPEVVEG    | --W-       | SDLVHC      | PSQRLLDRLVRRYAETKDSGSF   |             |           |           |                |      |        |
| DreridDIA1b | KICKRATG  | -RPR-    | CDLIQAMYKTEFA        | -----       | RLNGDV      | RLLTPDVVEG    | --W-       | SDLVHC      | PSQRLLDRLVRRYAETKDSGSF   |             |           |           |                |      |        |
| DreridDIA1a | KICKRATG  | -RPR-    | CDLIQSMYKTEFA        | -----       | RLNGDV      | RLLTPEVVEG    | --W-       | SDLVHC      | PSQRLLDRLVRRYAETKDSGSF   |             |           |           |                |      |        |
| BtaurDIA1   | SICKRATG  | -RPR-    | CDLLQAMPRTTEFA       | -----       | RLNGDV      | RLLTPEAVEG    | --W-       | SDLVHC      | PSQRLLDRLVRRYAETKDSGSF   |             |           |           |                |      |        |
| PpygmDIA1   | SICKRATG  | -RPR-    | CDLLQAMPRTTEFA       | -----       | RLNGDV      | RLLTPEAVEG    | --W-       | SDLVHC      | PSQRLLDRLVRRYAETKDSGSF   |             |           |           |                |      |        |
| CfamidDIA1  | SICKRATG  | -RPR-    | CDLLQAMPRTTEFA       | -----       | RLNGDV      | RLLTPEAVEG    | --W-       | SDLVHC      | PSQRLLDRLVRRYAETKDSGSF   |             |           |           |                |      |        |
| PtrogDIA1   | SICKRATG  | -RPR-    | CDLLQAMPRTTEFA       | -----       | RLNGDV      | RLLTPEAVEG    | --W-       | SDLVHC      | PSQRLLDRLVRRYAETKDSGSF   |             |           |           |                |      |        |
| TtrundDIA1  | SICKRATG  | -RPR-    | CDLLQAMPRTTEFA       | -----       | RLNGDV      | RLLTPEAVEG    | --W-       | SDLVHC      | PSQRLLDRLVRRYAETKDSGSF   |             |           |           |                |      |        |
| HsapiDIA1   | SICKRATG  | -RPR-    | CDLLQAMPRTTEFA       | -----       | RLNGDV      | RLLTPEAVEG    | --W-       | SDLVHC      | PSQRLLDRLVRRYAETKDSGSF   |             |           |           |                |      |        |
| MmuladDIA1  | SICKRATG  | -RPR-    | CDLLQAMPRTTEFA       | -----       | RLNGDV      | RLLTPEAVEG    | --W-       | SDLVHC      | PSQRLLDRLVRRYAETKDSGSF   |             |           |           |                |      |        |
| PvampDIA1   | SICKRATG  | -RPR-    | CDLLQAMPRTTEFA       | -----       | RLNGDV      | RLLTPEAVEG    | --W-       | SDLVHC      | PSQRLLDRLVRRYAETKDSGSF   |             |           |           |                |      |        |
| MdomeDIA1   | SICKRATG  | -RPR-    | CDLLQAMPRTTEFA       | -----       | RLNGDV      | RLLTPDAVEG    | --W-       | SDLVHC      | PSQRLLDRLVRRYAETKDSGSF   |             |           |           |                |      |        |
| MmuscdDIA1  | SICKRATG  | -RPR-    | CDLLQAMPRTTEFA       | -----       | RLNGDV      | RLLTPEAVEG    | --W-       | SDLVHC      | PSQRLLDRLVRRYAETKDSGSF   |             |           |           |                |      |        |
| RnorvdDIA1  | SICKRATG  | -RPR-    | CDLLQAMPRTTEFA       | -----       | RLNGDV      | RLLTPEAVEG    | --W-       | SDLVHC      | PSQRLLDRLVRRYAETKDSGSF   |             |           |           |                |      |        |
| GgallDIA1   | KICRRATG  | -RGR-    | CDLLQALHATEFA        | -----       | SLNGDV      | RLLTPDAVEG    | --W-       | SDLVHC      | PSQRLLDRLVRRYAETKDSGSF   |             |           |           |                |      |        |
| XtropDIA1   | RICKKATG  | -RPR-    | CDLVQAMYKTDFE        | -----       | RLNGDV      | RLLTPDVVEG    | --W-       | SDLVHC      | PSQRLLDRLVRRYAETKDSGSF   |             |           |           |                |      |        |
| BflorDIA1   | WICETGKE  | -GPO-    | CHIPSVTYYSNFS        | -----       | RVIYEG      | --LSPKSLGD    | -M-        | SDMVR       | CPSQRLIDRVLEKFAEHLGKET   |             |           |           |                |      |        |
| SsalaDIA1R  | SICRSVGR  | -QGP-    | CSIEAVLRVTPRF        | -----       | QSLNQSH     | LLPHIVKG      | --LAP      | PLLR        | CPSQRLLDRLVRRYAEEVVDVGSV |             |           |           |                |      |        |
| DreridDIA1R | SICTSAGK  | -GKS-    | CSIEGVLRTSRF         | -----       | QTWVHSN     | LLLPMSVKG     | --LVT      | PMLR        | CPSQRLLDRLVRRYFEVTDVGSV  |             |           |           |                |      |        |
| RnorvdDIA1R | RICASASG  | -PKT-    | CSIERILRKTGRF        | -----       | QKWLQAK     | RLLTPDLVQG    | --LPS      | PFLR        | CPSQRLLDRLVRRYAEEVVDAGSI |             |           |           |                |      |        |
| MmuscdDIA1R | RICASVSA  | -PKT-    | CSIERILQKTGRF        | -----       | QKWLQAK     | RLLTPDLVQG    | --LPS      | PFLR        | CPSQRLLDRLVRRYAEEVVDAGSI |             |           |           |                |      |        |
| MmuladDIA1R | RICASASA  | -PRT-    | CSIERVLRKTERF        | -----       | QKWLQAK     | RLLTPDLVQG    | --LAS      | PLLR        | CPSQRLLDRLVRRYAEEVVDAGSI |             |           |           |                |      |        |
| HsapiDIA1R  | RICASASA  | -PKT-    | CSIERVLRKTERF        | -----       | QKWLQAK     | RLLTPDLVQG    | --LAS      | PLLR        | CPSQRLLDRLVRRYAEEVVDAGSI |             |           |           |                |      |        |
| BtaurDIA1R  | RICASAAA  | -PKT-    | CSIERVLRKTERF        | -----       | QKWLQAK     | RLLTPDLVRG    | --LSS      | PLLR        | CPSQRLLDRLVRRYAEEVVDAGSI |             |           |           |                |      |        |
| EcabaDIA1R  | RICAFAAA  | -PKT-    | CSIERVLRKTRRF        | -----       | QKWLQAK     | RLLTPDLVRG    | --LPS      | PLLR        | CPSQRLLDRLVRRYAEEVVDAGSI |             |           |           |                |      |        |
| DordidDIA1R | RICAFASA  | -PKT-    | CSIERILRKTGRF        | -----       | QKWLQAK     | RLLTPDLVQG    | --LPS      | PFLR        | CPSQRLLDRLVRRYAEEVVDAGSI |             |           |           |                |      |        |
| MdomeDIA1R  | RICASASG  | -SKT-    | CSIERVLRKTERV        | -----       | KKWLKAK     | RLLTPDLVQG    | --LPS      | PMLR        | CPSQRLLDRLVRRYAEEVVDAGSV |             |           |           |                |      |        |
| OanatDIA1R  | KICTSVSL  | -VKT-    | CSIERVLRKTERF        | -----       | QKWLKAR     | RLLTPALVQG    | --LPS      | LLLRC       | PTQRLLDRLVRRYAEEVVDAGSV  |             |           |           |                |      |        |
| GgallDIA1R  | HICTSLLK  | -TKT-    | CSLERALRRTHRF        | -----       | QKWLRAK     | RLLTPDLVQG    | --LSS      | PMLR        | CPSQRLLDRLVRRYAEEVVDAGSI |             |           |           |                |      |        |
| BflorDIA1Lb | FICQNASL  | -PKD-    | CDVSHMISDTVLVTDNVLQV | SFLQDAWRIA  | HTRRS--I--  | AMEAC         | MTDRLIELIK | TAYDEN      | VNGKLS                   |             |           |           |                |      |        |
| BflorDIA1Lc | FICRSSSR  | -PHV-    | CNASSFILETMLVTDV     | ALKVPWLEAWK | ICHLEKS---- | ALS           | LCVSDR     | FLEDVR      | QLYVEDGGTDMT             |             |           |           |                |      |        |
| AaegyDIA1   | AVCDELGL  | -TQSNCK  | FKSDENTLKV           | -----       | RRKVL       | -EQ--         | ELEGCI     | ICPSKDEK    | --ALNRL                  | LNEVEGT--   |           |           |                |      |        |
| CpipidDIA1  | Q-IKDVKK  | -AF----- | -----                | -----       | YELGE       | --RPGGF       | HLCRT      | PSRKP       | -RFVSY                   | LEQRGHA--   |           |           |                |      |        |
| DyakuDIA1   | K-AENVEK  | -AF----- | -----                | -----       | YEQEE       | --QPGGF       | HLCRT      | PSRKP       | PRFV                     | SYLEQRGHA-- |           |           |                |      |        |
| DmeladDIA1  | Q-IKNVKK  | -DF----- | -----                | -----       | YELEE       | --RPGGF       | HLCRT      | LAREP       | -RFV                     | SYLEQRGHA-- |           |           |                |      |        |
| DsechDIA1   | Q-MKNVKK  | -AF----- | -----                | -----       | YELEE       | --RPGGF       | HLCRT      | LAREP       | -RFV                     | SYLEQRGHVY- |           |           |                |      |        |
| DpersDIA1   | RNMGILRE  | -AF----- | -----                | -----       | LEMEE       | --RPGGF       | QLCR       | SGFRTP      | -RFV                     | SYLEQRGHE-- |           |           |                |      |        |
| DpseuDIA1   | RNMGILGE  | -AF----- | -----                | -----       | LEMEE       | --RPGGF       | QLCR       | SGFRTP      | -RFV                     | SYLEQRGHE-- |           |           |                |      |        |
| DananDIA1   | S-LSSLQE  | -EF----- | -----                | -----       | LNLEE       | --RPGGF       | HLCRT      | AQKSS       | -PF                      | INYL        | NQRGYD--  |           |                |      |        |
| DwillDIA1   | D-----    | -----    | -----                | -----       | LHF         | --NPGGF       | QMC        | RNSTR       | ---                      | FLAY        | LEERGYL-- |           |                |      |        |
| NvitrDIA1   | MICSDDEL  | -HEL     | CYQESERKQDSKTN       | -----       | FYKL        | VESELANVGGD   | --INN      | KMR         | LCPT                     | TTKLEK      | LFVN      | VKFSHAEN- |                |      |        |
| SpurpDIA1L  | IICNQSQVD | PKRSCEV  | NAAATNSWMSKS         | ----        | SALNR       | VHKLHQEVYESQL | IAISATT    | CASPD       | FFELK                    | QLYR        | VS        | RWGTG-    |                |      |        |
| BflorDIA1La | FVCRNLSET | TATS-CDP | GKVLQEDLK            | -----       | ERLQP       | ---           | AHLK       | SLRE        | VFP                      | NTT         | SSLQ      | ATCMCS--  |                |      |        |
| CinteDIA1   | WICDRFKK  | PTN--CDT | GKVFKSWRAMN          | ----        | KITS        | AKGR          | LDPNLLK    | --I-        | SP                       | PLQ         | CP        | STRIADR   | IVRRVANKQGGVLL |      |        |
| AgambDIA1   | EYCDAYS   | SLTKQN   | -CRWAQ               | HDSVDR      | -----       | AKE           | FITTS      | IILDS       | -AR                      | VEG         | CIF       | PATNNRQ   | -SLQR          | FLSL | FDSTDN |



|             | 410             | 420      | 430    | 440      | 450       | 460     | 470      | 480                                             |
|-------------|-----------------|----------|--------|----------|-----------|---------|----------|-------------------------------------------------|
| SpurpDIA1   | QALKIAEQLSENRF  | FALYLT   | DVSEDN | LAVND-NG | ----EVLVI | DAENI   | IVVDR    | KKIKEDANPGWVKH-----QSEHEG                       |
| NvectDIA1   | NLITLHQLSSALDD  | WALYIAD  | PAPGNF | GVSD-SG  | ----KVTLL | DLEHLV  | VVDLSEV  | QMEEANDKPKPS-----D                              |
| GaculDIA1   | QLMDIAEQLTNNDF  | DFALYLLD | VSFDF  | AVGPRDG  | ----KVI   | VVDAEN  | VLVADKRL | IKQNKPESEFDVWY-----ESRFEE                       |
| OlatiDIA1   | QLMDIAEQLTNNDF  | DFALYLLD | VSFDF  | AVGPRDG  | ----KVI   | VVDAEN  | VLVADKRL | IKQNKPESEFDVWY-----ESRFEE                       |
| TnigrDIA1   | QLMDIAEQLTNNDF  | DFALYLLD | VSFDF  | AVGPRDG  | ----KVI   | IVDAEN  | VLVADKRL | IKQNKPESEFDVWY-----ESRFEE                       |
| TrunDIA1    | QLMDIAEQLTNNDF  | DFALYLLD | VSFDF  | AVGPRDG  | ----KVI   | IVDAEN  | VLVADKRL | IKQNKPESEFDVWY-----ESRFEE                       |
| DreriDIA1b  | QLMDIAEQLTNNDF  | DFALYLLD | VSFDF  | AVGPRDG  | ----KVI   | VVDAEN  | VVADKRL  | IKQNKPESEFDVWY-----ESRFEE                       |
| DreriDIA1a  | QLMDIAEQLTNNDF  | DFALYLLD | VSFDF  | AVGPRDG  | ----KVI   | IVDAEN  | VLVADKRL | IKQNKPESEFDVWY-----ESRYEE                       |
| BtaurDIA1   | QLMEIAEQLTNNDF  | DFALYLLD | VSFDF  | AVGPRDG  | ----KVI   | IVDAEN  | VLVADKRL | IKQNKPESEFDVWY-----ESKFDD                       |
| PpygmDIA1   | QLMEIAEQLTNNDF  | DFALYLLD | VSFDF  | AVGPRDG  | ----KVI   | IVDAEN  | VLVADKRL | IKQNKPESEFDVWY-----ESKFDD                       |
| CfamiDIA1   | QLMEIAEQLTNNDF  | DFALYLLD | VSFDF  | AVGPRDG  | ----KVI   | IVDAEN  | VLVADKRL | IKQNKPESEFDVWY-----ESKFDD                       |
| PtrogDIA1   | QLMEIAEQLTNNDF  | DFALYLLD | VSFDF  | AVGPRDG  | ----KVI   | IVDAEN  | VLVADKRL | IKQNKPESEFDVWY-----ESKFDD                       |
| TtrunDIA1   | QLMEIAEQLTNNDF  | DFALYLLD | VSFDF  | AVGPRDG  | ----KVI   | IVDAEN  | VLVADKRL | IKQNKPESEFDVWY-----ESKFDD                       |
| HsapiDIA1   | QLMEIAEQLTNNDF  | DFALYLLD | VSFDF  | AVGPRDG  | ----KVI   | IVDAEN  | VLVADKRL | IKQNKPESEFDVWY-----ESKFDD                       |
| MmuladIA1   | QLMEIAEQLTNNDF  | DFALYLLD | VSFDF  | AVGPRDG  | ----KVI   | IVDAEN  | VLVADKRL | IKQNKPESEFDVWY-----ESKFDD                       |
| PvpamDIA1   | QLMEIAEQLTNNDF  | DFALYLLD | VSFDF  | AVGPRDG  | ----KVI   | IVDAEN  | VLVADKRL | IKQNKPESEFDVWY-----ESKFDD                       |
| MdomeDIA1   | QLMEIAEQLTNNDF  | DFALYLLD | VSFDF  | AVGPRDG  | ----KVI   | IVDAEN  | VLVADKRL | IKQNKPESEFDVWY-----ESKFDD                       |
| MmuscdIA1   | QLMEIAEQLTNNDF  | DFALYLLD | VSFDF  | AVGPRDG  | ----KVI   | IVDAEN  | VLVADKRL | IKQNKPESEFDVWY-----ESKFDD                       |
| RnorvDIA1   | QLMEIAEQLTNNDF  | DFALYLLD | VSFDF  | AVGPRDG  | ----KVI   | IVDAEN  | VLVADKRL | IKQNKPESEFDVWY-----ESKFDD                       |
| GgallDIA1   | QLMEIAEQLTNNDF  | DFALYLLD | VSFDF  | AVGPRDG  | ----KVI   | IVDAEN  | VLVADKRL | IKQNKPESEFDVWY-----ESKFDD                       |
| XtropDIA1   | QLMEIAEQLTNNDF  | DFALYLLD | VSFDF  | AVGPRDG  | ----KVI   | IVDAEN  | VLVADKRL | IKQNKPESEFDVWY-----ESKFDD                       |
| BflorDIA1   | QMMKIAEYLTNNEAD | GLYLT    | DISYEN | FGVTS-DG | ----NLFVI | DVENV   | IVVVKQ   | KADKPRNWEARY-----QSHFDE                         |
| SsalaDIA1R  | QLLHITQGLGHNSL  | GGFLLY   | YTRLG  | EDMFG    | LLD-DQ    | ---RVFI | TDASSI   | GVIDLEQGFPPDPPS---QTGS-----DGDIFS               |
| DreriDIA1R  | QLLHITQSLSANSL  | RFRFY    | TRIPED | MF       | GILE-DN   | ---KVI  | IVDTST   | IGIDLQEGHPPDK-D-LLPE-----ELDVFS                 |
| RnorvDIA1R  | QLLGVLESLSRNDL  | NLYFF    | YFTHV  | DAGM     | FGIFD-NG  | ---HLF  | IRDASAL  | GIIDKQEGSQAAAD---RTGE-----NEDIFS                |
| MmuscdIA1R  | QLLRVLESLSRNDL  | NLYFF    | YFTHV  | DAGM     | FGIFD-NG  | ---HLF  | IRDASAL  | GIIDKQEGSQAAA---RTGE-----NEDIFS                 |
| MmuladIA1R  | QLLGVLESLSRNDL  | NLYFF    | YFTHID | AGM      | GFVFN-NG  | ---HLF  | IRDASAV  | GVIDKQEGSQEAT---RAGE-----NKDIFS                 |
| HsapiDIA1R  | QLLGVLESLSRNDL  | NLYFF    | YFTHID | AGM      | GFVFN-NG  | ---HLF  | IRDASAV  | GVIDKQEGSQEAN---RAGE-----NKDIFS                 |
| BtaurDIA1R  | QLLGVLESLSRNDL  | NLYFF    | YFTHV  | DADM     | GFIFN-NG  | ---HLF  | IRDASAL  | GVIDRQEGSQAAS---GAGD-----NKDIFS                 |
| EcabaDIA1R  | QLLGVLESLSRNDL  | NLYFF    | YFTHV  | DADM     | GFIFN-NG  | ---HLF  | IRDASTL  | GVIDRQEGSQAAA---RAGE-----NKDIFS                 |
| DordiDIA1R  | QLLGVLESLSRNDL  | NLYFF    | YFTHV  | DAAM     | GFIFS-NG  | ---HLF  | IRDASAL  | GVIDKQEGSQAAP---KAGE-----NQDIFS                 |
| MdomeDIA1R  | QLLGLDLSLRNDL   | NLYFF    | YFTRID | AGT      | FGIFD-NG  | ---HLF  | IRDASTV  | GVIDKQEGSLTLD---RQEE-----SKDIFS                 |
| OanatDIA1R  | QLLGVIEFLRHNDW  | NLYFF    | YFTRI  | HAGT     | FGVFD-NG  | ---HLF  | IRDASSL  | GVIDRQEGKRPAP---SSPE-----PRDIFS                 |
| GgallDIA1R  | QLLAVLHSMGTNDL  | NLYFF    | YFTRV  | DVGT     | GFVFS-NG  | ---HLF  | IRDASTL  | GVIDKQEGSQPID---GQQE-----YKDIFS                 |
| BflorDIA1Lb | QLLEMIDKFRNGDP  | KWV      | IFVDF  | SFNN     | AVNN-YG   | ---RLT  | LIDFDD   | VMLIDREEFVGENK--TEPCD-----LKCFKT                |
| BflorDIA1Lc | QLLQLVDALREKDP  | DWV      | FLDVS  | FQNF     | AVDS-RG   | ---WVRL | IDLDDV   | MVIDRRTVVNQEQ---TEMCN-----EQCYTD                |
| AaegyDIA1   | ELIKASLNETAGVD  | NFR      | YLT    | DISPD    | NI        | VVMS    | SSEEE-I  | KVTFVDLNNVIILDSHSHKRLKP-----SK-----QKHVHS       |
| CpipiDIA1   | ELIQASFLFTEGVN  | GFR      | YLT    | INPD     | NI        | AVQA    | QPSGS-F  | QVSVFIDLDNVIILDSQSKRLDR-----SK-----ARNIHS       |
| DyakuDIA1   | QLMQLSLKLTFGF   | SDFR     | I      | FLTDF    | TGDN      | FAYDE   | HTK---   | KVYLIDLDSVVLVD---ASSAT---GQ---AEKYEP            |
| DerecDIA1   | QLIQLSLKLTFGF   | SDFR     | I      | FLTDF    | TGDN      | FAYDE   | DSK---   | RVYLIDLDSVVLVD---ASSAA---GQ---AEKYVP            |
| DmeladIA1   | QLIQLSLKLTFGF   | ADFR     | I      | LTDF     | TADN      | LAYDE   | DTK---   | KVYLIDLDSVVLVD---ASFAA---GH---AEKYEP            |
| DsechDIA1   | QLIQLSLKLTFGF   | ADFR     | I      | LTDF     | TADN      | LAYDE   | ETK---   | KVYLIDLDSVVLVD---ASSMA---GQ---AEKYEP            |
| DpersDIA1   | QLLQLSLKLTFGF   | ADFR     | I      | FLTDF    | TADN      | LAFDE   | ASQ---   | SVILIDLDSVVLVD---AAVPL---GD---AQKYEP            |
| DpseuDIA1   | QLLQLSLKLTFGF   | ADFR     | I      | FLTDF    | TADN      | LAFDE   | ASQ---   | SVILIDLDSVVLVD---AAVPL---GD---AQKYEP            |
| DananDIA1   | QLIHLSLKLTFGF   | ADFR     | I      | FLTDF    | SDNL      | TFDE    | DTR---   | RVLLIDLDSVVMVD---AASTS---GQ---AEKYEP            |
| DwillDIA1   | QLLQLAKLSAGFK   | GFR      | I      | YLTDF    | TADN      | FAYNE   | ANG---   | TVLLIDMDTMVLVESNDEAESES---QL---SKKYK            |
| NvitrDIA1   | SLLQAADTLMKNS   | EFA      | F      | YLT      | DISMD     | NI      | AVNN     | EDK----ATFVDLENIIVVEKNPPEKALVGIESWNE-----TYTNAV |
| SpurpDIA1L  | KILQMIEDFHDSSD  | KWV      | LLLD   | DFG      | YEN       | FVMTS   | -EG---   | QLKVNLGGMVIDKDOTSTTPDMNPHLNNRTELCNEDCLN         |
| BflorDIA1La | QLLQMLDDFQNKDP  | DW       | LLMF   | VEVNI    | EIN       | SVSS    | -DG---   | RLILDGLNMTINKHDLKNSKKRSVC-----NEACFK            |
| CinteDIA1   | QLLDLAEHF       | TYNDL    | NLYM   | FALH     | RTPR      | IGIS    | -TG---   | KLRIKNADNVILID---NNSKN-----DKGLYE               |
| AgambDIA1   | ELIRAGFKFTEGI   | HGR      | VFL    | T        | INPD      | NVNL    | KNDNK    | QVYVSIVDLDNVIILDSWAEVFLTKN-----THHVHS           |

. . . . .  
 . . . . .  
 . . . . .

|             | 490                                                                             | 500   | 510                         | 520                    | 530        | 540     | 550 | 560 |
|-------------|---------------------------------------------------------------------------------|-------|-----------------------------|------------------------|------------|---------|-----|-----|
| SpurpDIA1   | CGSRRECIMFSHTDLCNHYSDHNYAVCQGLFGKDSPHGD                                         | ----- | GGLLHSIPSDL                 | -----                  | SSYMRKVK   |         |     |     |
| NvectDIA1   | CS-QPDCLSFSPSDMCSGGSRDHNYAICQGVLAGSSRRQ                                         | ----- | GLLHNP                      | -----                  | VALKASLN   |         |     |     |
| GaculDIA1   | CD-REACLSFSKESLCSRVTVDHNYAVCQNLLSRYATWRGTT                                      | ----- | GGLLHDP                     | PPAH-----              | IAKDGQLL   |         |     |     |
| OlatiDIA1   | CD-REACLSFSKDSLCSRVTVDHNYAVCQNLLSRYATWRGTT                                      | ----- | GGLLHDP                     | PPAH-----              | IAKDGQLE   |         |     |     |
| TnigrDIA1   | CD-REACLSFSKDSLCSRVTVDHNYAVCQNLLSRYATWRGTT                                      | ----- | GGLLHDP                     | PPAH-----              | IAKDGQLE   |         |     |     |
| TrubrDIA1   | CD-REACLSFSKDSLCSRVTVDHNYAVCQNLLSRYATWRGTT                                      | ----- | GGLLHDP                     | PPAH-----              | IAKDGQLE   |         |     |     |
| DreriDIA1b  | CD-KEACLSFSKDMCSRVTVDHNYAICQNLLSRYATWRGSS                                       | ----- | GGLLHDP                     | PPH-----               | IAKDGQLE   |         |     |     |
| DreriDIA1a  | CD-KEACLSFSKDLCSRVTVDHNYAVCQDILLSRFSSWRGST                                      | ----- | GGLLHDP                     | PPPD-----              | VVKDGRLI   |         |     |     |
| BtaurDIA1   | CD-KEACLSFSKEILCARATVDHNYAVCQNLLSRHATWRGTS                                      | ----- | GGLLHDP                     | PPSE-----              | IAKDGRL    |         |     |     |
| PpygmDIA1   | CD-KEACLSFSKEILCARATVDHNYAICQNLLSRHATWRGTS                                      | ----- | GGLLHDP                     | PPSE-----              | IAKDGRL    |         |     |     |
| CfamIDIA1   | CD-KEACLSFSKEILCARATVDHNYAVCQNLLSRHATWRGTS                                      | ----- | GGLLHDP                     | PPSE-----              | IAKDGRL    |         |     |     |
| PtrogDIA1   | CD-KEACLSFSKEILCARATVDHNYAVCQNLLSRHATWRGTS                                      | ----- | GGLLHDP                     | PPSE-----              | IAKDGRL    |         |     |     |
| TtrunDIA1   | CD-KEACLSFSKEILCARATVDHNYAVCQNLLSRHATWRGTS                                      | ----- | GGLLHDP                     | PPSE-----              | IAKDGRL    |         |     |     |
| HsapiDIA1   | CD-KEACLSFSKEILCARATVDHNYAVCQNLLSRHATWRGTS                                      | ----- | GGLLHDP                     | PPSE-----              | IAKDGRL    |         |     |     |
| MmuladIA1   | CD-KEACLSFSKEILCARATVDHNYAVCQNLLSRHATWRGTS                                      | ----- | GGLLHDP                     | PPSE-----              | IAKDGRL    |         |     |     |
| PvpamDIA1   | CD-KEACLSFSKEILCARATVDHNYAVCQNLLSRHATWRGTS                                      | ----- | GGLLHDP                     | PPSE-----              | IAKDGRL    |         |     |     |
| MdomeDIA1   | CD-KEACLSFSKEILCARATVDHNYAICQNLLSRHATWRGTS                                      | ----- | GGLLHDP                     | PPGE-----              | IAKDGRL    |         |     |     |
| MmuscdIA1   | CD-KEACLSFSKEILCARATVDHNYAVCQNLLSRHATWRGTS                                      | ----- | GGLLHDP                     | PPSE-----              | IAKDGRL    |         |     |     |
| RnorvDIA1   | CD-KEACLSFSKEILCARATVDHNYAVCQNLLSRHATWRGTS                                      | ----- | GGLLHDP                     | PPSE-----              | IAKDGRL    |         |     |     |
| GgallDIA1   | CD-KEACLSFSKEILCARATVDHNYAVCQNLLSRHATWRGTS                                      | ----- | GGLLHDP                     | PPAD-----              | IAKDGRL    |         |     |     |
| XtropDIA1   | CD-KEACLSFSKEILCSRATVDHNYAICQNLLSRHATWRGTS                                      | ----- | GGLLHDP                     | PPAE-----              | IAKDGRL    |         |     |     |
| BflorDIA1   | CPGMNCLSFSDVSAALCRYLHTDHNYAVCRNMLSEYASEMGP                                      | ----- | GGLLHDP                     | PET-----               | VVRDGTLO   |         |     |     |
| SsalaDIA1R  | CLGQGTSPCHR-SPPCSSVRPTQSLTLLCTALLPRLLTERGAQTTRLPMEGAEAGRLARDV                   | ----- | PLLVGCAD                    |                        |            |         |     |     |
| DreriDIA1R  | CL--SGSCVR--PPPCETVREAQSFILLCKYILN-NLLTSN                                       | ----- | DKQSG-LPRAA                 | -----                  | VDELLVCAD  |         |     |     |
| RnorvDIA1R  | CL-VSGCQVQ--MSSCDTVPEKQNLVLCQQLLP-QLLRG                                         | ----- | KFPSVQ                      | QEI-----               | DSALSLCCK  |         |     |     |
| MmuscdIA1R  | CL-VSDCQIQ--LSSCDTVPEKQSLVLCQQLLP-QLLQ                                          | ----- | KFPSVQ                      | KEI-----               | DSALSLCCK  |         |     |     |
| MmuladIA1R  | CL-VSGCQAQ--LPSCESVSEKQSLVLCQKLLP-RLLQ                                          | ----- | RFPSVQ                      | DDI-----               | DSALAQCGD  |         |     |     |
| HsapiDIA1R  | CL-VSGCQAQ--LPSCESI SEKQSLVLCQKLLP-RLLQ                                         | ----- | RFPSVQ                      | DDI-----               | DSILVQCGD  |         |     |     |
| BtaurDIA1R  | CL-VSGCQTK--LPSCDTIPEKQNLVLCQVLP-LLLQA                                          | ----- | KFPSVQ                      | EI-----                | DAELTRCAD  |         |     |     |
| EcabaDIA1R  | CL-LSDCQAE--LPSCDTVPEKQSLVLCQVLP-RLLQ                                           | ----- | KFPSVQ                      | EI-----                | DATLTWCGE  |         |     |     |
| DordiDIA1R  | CL-VSGCQAQL-LPSCDNIPDKQSVVLCQQLLP-QLLQ                                          | ----- | KFPSVQ                      | EI-----                | DSALAQCGQ  |         |     |     |
| MdomeDIA1R  | CL-VLDCQSP--FPSCSVKEKQSWVMACQQLLP-QLLKE                                         | ----- | KFPQPI                      | QEI-----               | DSALVLCGN  |         |     |     |
| OanatDIA1R  | CL-AADCQSD--LPSCNTVQEHQSLVLCRELLP-KLLE                                          | ----- | KFPKPV                      | QEI-----               | DALLDRCGD  |         |     |     |
| GgallDIA1R  | CL-TVDCQSA--FVSCNSIREKQSLVMVCQELLP-KLLRG                                        | ----- | KFLPPV                      | QEI-----               | DSFLQHCAE  |         |     |     |
| BflorDIA1Lb | FISQIEAMNSYDSCSAMPQYSQMMYALACVRLLSHLPEHLSEP                                     | ----- | NPMDPKPKDHRPDSERP           | -----                  | RLLWGPPEQ  | EAKVLE  |     |     |
| BflorDIA1Lc | FQKKLYS-DEYH-CDDIFKYAPMMYASICARLLSNLQKHPERRKWEIREYQEGQSIELDEPPVKGLFHNPPDEIREALE | ----- | GFLHSLG                     | TDS-----               | KLEAFR     |         |     |     |
| AaegyDIA1   | RIDCGCFAYIQEDICVHQISDINLFAICQLLYENLNQDREG                                       | ----- | GFLHIQ                      | PND-----               | SQPRLSEIR  |         |     |     |
| CpipiDIA1   | RIPCDGCFAYVQEDLCSYQHSINQFAICQLLYENLNQDREG                                       | ----- | GFLHIQ                      | PND-----               | SQPRLSEIR  |         |     |     |
| DyakuDIA1   | --LPGEG-FTFDVSAFCSGHLQDANIYQACLLLRDYLKLNLDN                                     | ----- | ERLQ                        |                        |            |         |     |     |
| DerecDIA1   | --LPGEG-FTFDVSAFCSGHLQDANIYQACLLLRDYLKLNLDN                                     | ----- | ERLQ                        |                        |            |         |     |     |
| DmeladIA1   | --LTGEG-FTFDVSAFCSGHLQDANIYQACLLLRDYLKLNLDN                                     | ----- | EKLQ                        |                        |            |         |     |     |
| DsechDIA1   | --LAGEG-FTFDVSAFCSGHLQDANIYQACLLLRDYLKLNLDN                                     | ----- | EKLQ                        |                        |            |         |     |     |
| DpersDIA1   | --LPGDG-FTFDVKSFCGQQLDANVYQACLLLRDYLKLNLDN                                      | ----- | GRLE                        |                        |            |         |     |     |
| DpseuDIA1   | --LPGDG-FTFDVKSFCGQQLDANVYQACLLLRDYLKLNLDN                                      | ----- | GRLE                        |                        |            |         |     |     |
| DananDIA1   | --LPGEG-FTFDVSAFCSGRQLDANVYQACLLLRDYLKLNLDN                                     | ----- | ERLQ                        |                        |            |         |     |     |
| DwillDIA1   | --FPEG-FTYDVNAFCNDQDLANIYQVCLLRDQLLPDVK                                         | ----- | HRLK                        |                        |            |         |     |     |
| NvitrDIA1   | DLDCQDCFVSPNDICSHKVS DHNFYAI CQHILTQALGAVFHN                                    | ----- | QGF                         | LHDP-----              | YILQKHPTLI |         |     |     |
| SpurpDIA1L  | TFVKQLQTEPDTHCREVPRHVELMYMACHSLSDLMTKYER                                        | ----- | FFQPLDTPRKHHPGMLHDAPYEVDVLS |                        |            |         |     |     |
| BflorDIA1La | RFRNLSHRPETS CRQAGRYSQLMYARACQRILGCWQTERS                                       | ----- | GRVLS                       | SSSKDASCAYGRLLGPPREAKQ | ELE        |         |     |     |
| CinteDIA1   | VRYKQEKVDITEENLCDHSENDVNYVVICRHLGGTWK                                           | ----- | KYPG                        | LHDP                   | KEFG-----  | VFSSQMF |     |     |
| AgambDIA1   | KIECNGCFAYVQEDVCRYQNSDLNLFATCQLLENLNQHYAK                                       | ----- | GLLHYDR                     | DAEAFP-----            | VLGEASKMLQ |         |     |     |

|             | 570   | 580     | 590      | 600   | 610     | 620    | 630     |       |      |       |      |      |      |      |       |    |      |      |
|-------------|-------|---------|----------|-------|---------|--------|---------|-------|------|-------|------|------|------|------|-------|----|------|------|
| SpurpDIA1   | GQIAE | CRSPSK  | --RDGRYL | VVKEL | KETLM   | -----  | KLIT    |       |      |       |      |      |      |      |       |    |      |      |
| NvectDIA1   | QLLQD | CTAQDM  | --RNTRE  | ETAQK | LSELLQ  | -----  | GYL     |       |      |       |      |      |      |      |       |    |      |      |
| GaculDIA1   | TLLDE | CTRPKK  | --RYGRF  | QAAKE | LREYLT  | -----  | QLAAASS |       |      |       |      |      |      |      |       |    |      |      |
| OlatiDIA1   | ALLDE | CTRPKK  | --RYGRF  | QAAKE | LREYLT  | -----  | KLAAASS |       |      |       |      |      |      |      |       |    |      |      |
| TnigrDIA1   | ALLDE | CTRPKK  | --RYGRF  | QAAKE | LREYLT  | -----  | QLA     |       |      |       |      |      |      |      |       |    |      |      |
| TrubrDIA1   | ALLDE | CTRPKK  | --RFGRF  | QAAKE | LREYLT  | -----  | QLAASS  |       |      |       |      |      |      |      |       |    |      |      |
| DreriDIA1b  | ALLEE | CANPKK  | --RYGRF  | QAAKE | LRDYLT  | -----  | QLSGS   |       |      |       |      |      |      |      |       |    |      |      |
| DreriDIA1a  | ALLDE | CTRPQK  | --RYGRF  | QAAKE | LREFLT  | -----  | QLTQTS  |       |      |       |      |      |      |      |       |    |      |      |
| BtaurDIA1   | ALLDE | CANPKK  | --RYGRF  | QAAKE | LREYLA  | -----  | QLSNN   |       |      |       |      |      |      |      |       |    |      |      |
| PpygmDIA1   | ALLDE | CANPKK  | --RYGRF  | QAAKE | LREYLA  | -----  | QLSNN   |       |      |       |      |      |      |      |       |    |      |      |
| CfamiDIA1   | ALLDE | CANPKK  | --RYGRF  | QAAKE | LREYLA  | -----  | QLSNN   |       |      |       |      |      |      |      |       |    |      |      |
| PtrogDIA1   | ALLDE | CANPKK  | --RYGRF  | QAAKE | LREYLA  | -----  | QLSNN   |       |      |       |      |      |      |      |       |    |      |      |
| TtrunDIA1   | ALLDE | CANPKK  | --RYGRF  | QAAKE | LREYLA  | -----  | QLSNN   |       |      |       |      |      |      |      |       |    |      |      |
| HsapiDIA1   | ALLDE | CANPKK  | --RYGRF  | QAAKE | LREYLA  | -----  | QLSNN   |       |      |       |      |      |      |      |       |    |      |      |
| MmulaDIA1   | ALLDE | CANPKK  | --RYGRF  | QAAKE | LREYLA  | -----  | QLSNN   |       |      |       |      |      |      |      |       |    |      |      |
| PvampDIA1   | ALLDE | CANPKK  | --RYGRF  | HAAKE | LREYLA  | -----  | QLSNN   |       |      |       |      |      |      |      |       |    |      |      |
| MdomeDIA1   | ALLDE | CAHPKK  | --RFGRF  | QAAKE | LREYLA  | -----  | QLSNN   |       |      |       |      |      |      |      |       |    |      |      |
| MmuscDIA1   | ALLDE | CTNPKK  | --RYGRF  | QAAKE | LRGYLA  | -----  | QLSHN   |       |      |       |      |      |      |      |       |    |      |      |
| RnorvDIA1   | ALLDE | CTNPKK  | --RYGRF  | QAAKE | LRGYLA  | -----  | QLSHN   |       |      |       |      |      |      |      |       |    |      |      |
| GgallDIA1   | ALLDE | CANPKK  | --RYGRF  | QAAKE | LREYLA  | -----  | QLSNN   |       |      |       |      |      |      |      |       |    |      |      |
| XtropDIA1   | ALLDE | CANPKK  | --RYGRF  | KSAKE | LREYLA  | -----  | QLSNN   |       |      |       |      |      |      |      |       |    |      |      |
| BflorDIA1   | RLLAE | CAKPR   | --LYGRF  | DAAKE | LIELLG  | -----  | SFLK    |       |      |       |      |      |      |      |       |    |      |      |
| SsalaDIA1R  | PSQPD | WRIMAA  | --VGS    | LMDLL | KPMRPCN | -----  | HYTYR   |       |      |       |      |      |      |      |       |    |      |      |
| DreriDIA1R  | PSQLD | QTITKS  | --VQSL   | KNILK | TLRPCSP | -----  | QYAYR   |       |      |       |      |      |      |      |       |    |      |      |
| RnorvDIA1R  | DASTN | LEVFGA  | --TSL    | LKNI  | LRS     | LRTCDP | -----   | RFAYR |      |       |      |      |      |      |       |    |      |      |
| MmuscDIA1R  | DNSTD | LEVFGA  | --TSL    | LKDIL | RS      | LRTCDP | -----   | RFAYR |      |       |      |      |      |      |       |    |      |      |
| MmulaDIA1R  | STRPD | PEVLGA  | --ASW    | LKHIL | RLRPL   | LRTCDP | -----   | RFAYR |      |       |      |      |      |      |       |    |      |      |
| HsapiDIA1R  | SIRPD | PEVLGA  | --ASQ    | LKDIL | RLRPL   | LRTCDP | -----   | RFAYR |      |       |      |      |      |      |       |    |      |      |
| BtaurDIA1R  | GTRPD | PEVLGA  | --ASR    | LKDIL | RLRPL   | LRTCDP | -----   | RFAYR |      |       |      |      |      |      |       |    |      |      |
| EcabaDIA1R  | DTRPD | AEVLGA  | --ASR    | LKDIL | RLRPL   | LRTCDP | -----   | RFAYR |      |       |      |      |      |      |       |    |      |      |
| DordiDIA1R  | GIRPD | SEVFGA  | --ASR    | LKDIL | RLRPL   | LRTCDP | -----   | RFAYR |      |       |      |      |      |      |       |    |      |      |
| MdomeDIA1R  | SSLSQ | EVIEA   | --ASR    | LKAIL | KPLR    | LRTCDP | -----   | RYAYR |      |       |      |      |      |      |       |    |      |      |
| OanatDIA1R  | SSLDG | QTVIGG  | --ARR    | LMDIL | KLS     | LRTCDA | -----   | RFAYR |      |       |      |      |      |      |       |    |      |      |
| GgallDIA1R  | GLADD | QDVNEA  | --MAK    | LQLLK | PLRSCDS | -----  | RFAYR   |       |      |       |      |      |      |      |       |    |      |      |
| BflorDIA1Lb | ELLRG | CVENV   | --AGG    | RLEAV | GE      | LKTFLR | -----   | RNAK  |      |       |      |      |      |      |       |    |      |      |
| BflorDIA1Lc | GALTQ | CVHETL  | --PRG    | RLGAV | LR      | LQEI   | -----   | TT    |      |       |      |      |      |      |       |    |      |      |
| AaegyDIA1   | KLLHC | CVYCP   | PPDC     | DRQGL | LQVQ    | EIIH   | -----   | DVLH  |      |       |      |      |      |      |       |    |      |      |
| CpipiDIA1   | QLLH  | CVYCV   | PPDC     | DRQGL | LQVQ    | EIID   | -----   | GILV  |      |       |      |      |      |      |       |    |      |      |
| DyakuDIA1   | LLLEQ | CVACQ   | DDFC     | DMRF  | QHAYD   | LKMLD  | -----   | SKN   |      |       |      |      |      |      |       |    |      |      |
| DerecDIA1   | LLLEQ | CVACQ   | DDFC     | DMRF  | QHAYD   | LKIVLD | -----   | SKI   |      |       |      |      |      |      |       |    |      |      |
| DmeladDIA1  | LLLEQ | CVACQ   | DDFC     | DMRF  | QHAYD   | LKVLE  | -----   | SNN   |      |       |      |      |      |      |       |    |      |      |
| DsechDIA1   | LLLEQ | CVACQ   | DDFC     | DMRF  | QHAYD   | LKELE  | -----   | SKN   |      |       |      |      |      |      |       |    |      |      |
| DpersDIA1   | MLLEQ | CVRC    | DDAT     | CDMRF | QQAYD   | LKLLG  | -----   | ELLGS |      |       |      |      |      |      |       |    |      |      |
| DpseuDIA1   | MLLEQ | CVRC    | DDAT     | CDMRF | QQAYD   | LKLLG  | -----   | ELLGS |      |       |      |      |      |      |       |    |      |      |
| DananDIA1   | LLLEK | CV      | EQDD     | LC    | DMRF    | QYAYD  | LKLLD   | ----- | S    |       |      |      |      |      |       |    |      |      |
| DwillDIA1   | EMLND | CV      | QEDDK    | CDIR  | FKYANN  | LIDL   | LV      | ----- | EINN |       |      |      |      |      |       |    |      |      |
| NvitrDIA1   | DLLEQ | CAKPDIG | --YSR    | IDIAH | KL      | IVLLD  | -----   | SVIK  |      |       |      |      |      |      |       |    |      |      |
| SpurpDIA1L  | ELLYE | CVFEGQ  | --PGR    | RMSV  | RV      | LKRL   | LT      | ----- | IIQR |       |      |      |      |      |       |    |      |      |
| BflorDIA1La | DLLTE | CV      | ETK      | --AGG | RITALK  | QIRV   | LLA     | ----- | A    |       |      |      |      |      |       |    |      |      |
| CinteDIA1   | VLLDI | CSR     | GKTAV    | APER  | RTL     | SHSIR  | RRLA    | ANQL  | RVLE | RRR   | ICSP | DFKY | RYPE | CELA | EAGIN | LP | SIEL | QWLH |
| AgambDIA1   | NLLSE | CV      | YCP      | PPDC  | QNR     | SHIL   | KML     | HI    | IID  | ----- | QTII |      |      |      |       |    |      |      |
