# Supplementary material for: Characterization of the Deleted in Autism 1 Protein Family: Implications for Studying Cognitive Disorders
Source: PubMed Central journal article supplement (PMC3023760; doi:10.1371/journal.pone.0014547), 2011-01-19
Supplement: pone.0014547.s018.pdf [file pone.0014547.s018.pdf]

**Fig. S8**

|             |   |                                                                |
|-------------|---|----------------------------------------------------------------|
| SpurpDIA1   | 1 | -----                                                          |
| NvectDIA1   | 1 | -----                                                          |
| GaculDIA1   | 1 | -----                                                          |
| OlatiDIA1   | 1 | -----                                                          |
| TnigrDIA1   | 1 | -----                                                          |
| TrubrDIA1   | 1 | -----                                                          |
| DreriDIA1b  | 1 | -----                                                          |
| DreriDIA1a  | 1 | -----                                                          |
| BtaurDIA1   | 1 | -----                                                          |
| PpygmDIA1   | 1 | -----                                                          |
| CfamiDIA1   | 1 | -----                                                          |
| PtrogDIA1   | 1 | -----                                                          |
| TtrunDIA1   | 1 | -----                                                          |
| HsapiDIA1   | 1 | -----                                                          |
| MmulaDIA1   | 1 | -----                                                          |
| PvampDIA1   | 1 | -----                                                          |
| MdomeDIA1   | 1 | -----                                                          |
| MmuscdIA1   | 1 | -----                                                          |
| RnorvDIA1   | 1 | -----                                                          |
| GgallDIA1   | 1 | -----                                                          |
| XtropDIA1   | 1 | -----                                                          |
| BflorDIA1   | 1 | -----                                                          |
| SsalaDIA1R  | 1 | -----                                                          |
| DreriDIA1R  | 1 | -----                                                          |
| RnorvDIA1R  | 1 | -----                                                          |
| MmuscdIA1R  | 1 | -----                                                          |
| MmulaDIA1R  | 1 | -----                                                          |
| HsapiDIA1R  | 1 | -----                                                          |
| BtaurDIA1R  | 1 | -----                                                          |
| EcabaDIA1R  | 1 | -----                                                          |
| DordiDIA1R  | 1 | -----                                                          |
| MdomeDIA1R  | 1 | -----                                                          |
| OanatDIA1R  | 1 | -----                                                          |
| GgallDIA1R  | 1 | -----                                                          |
| BflorDIA1Lb | 1 | MASARRWCRRLLHYSGWTRVLFLLTLMIAVGF IARNYWQVEDDLEARKRISNGGDKKYAQS |
| BflorDIA1Lc | 1 | -----                                                          |
| AaegyDIA1   | 1 | -----                                                          |
| CpipiDIA1   | 1 | -----                                                          |
| DyakuDIA1   | 1 | -----                                                          |
| DerecDIA1   | 1 | -----                                                          |
| DmelaDIA1   | 1 | -----                                                          |
| DsechDIA1   | 1 | -----                                                          |
| DpersDIA1   | 1 | -----                                                          |
| DpseuDIA1   | 1 | -----                                                          |
| DananDIA1   | 1 | -----                                                          |
| DwillDIA1   | 1 | -----                                                          |
| NvitrDIA1   | 1 | -----                                                          |
| SpurpDIA1L  | 1 | -----MGPRIRKKILILGSSILFTIFTVQLTGLNSLRDDDDNNAL                  |
| BflorDIA1La | 1 | -----MPILVESEAGYGGRHGRAMVARRMVRKCCLP                           |
| CinteDIA1   | 1 | -----                                                          |
| AgambDIA1   | 1 | -----                                                          |
| consensus   | 1 | -----                                                          |

|             |    |                               |      |                               |
|-------------|----|-------------------------------|------|-------------------------------|
| SpurpDIA1   | 1  | -----MRRYFNQFTNRF CISTTQQI    | IWL  | VVLSSMCL                      |
| NvectDIA1   | 1  | -----MHFGGILRKRRYICRLVLL      | IV   | ISFSDLLL                      |
| GaculDIA1   | 1  | -----MLRFLPL-KLGRLYRCLK       | LLV  | VGLFVILL                      |
| OlatiDIA1   | 1  | -----MLRFLPL-KLGRLYRCLK       | LLF  | VGLFVILL                      |
| TnigrDIA1   | 1  | -----MLRFLPL-KLGRLYRCLK       | LLV  | VGLFVILL                      |
| TrubrDIA1   | 1  | -----MLRFLPL-KLGRLYRCLK       | LLV  | VGLFVILL                      |
| DreriDIA1b  | 1  | -----MLRFLPL-KLGRLYRCLK       | LLF  | LGLFVILL                      |
| DreriDIA1a  | 1  | -----MLRILSL-KFGRVYRCGKFL     | I    | IVALFVILL                     |
| BtaurDIA1   | 1  | -----MWRLVPP-KLGRLSRSLK       | AA   | GSLLVLMV                      |
| PpygmDIA1   | 1  | -----MWRLVPP-KLGRLSRSLK       | AA   | GSLLVLMV                      |
| CfamiDIA1   | 1  | -----MWRLVPP-KLGRLSRSLK       | AA   | GSLLVLMV                      |
| PtrogDIA1   | 1  | -----MWRLVPP-KLGRLSRSLK       | AA   | GSLLVLMV                      |
| TtrunDIA1   | 1  | -----MWRLVPP-KLGRLSRSLK       | AA   | GSLLVLMV                      |
| HsapiDIA1   | 1  | -----MWRLVPP-KLGRLSRSLK       | AA   | GSLLVLMV                      |
| MmulaDIA1   | 1  | -----MWRLVPP-KLGRLSRSLK       | AA   | GSLLVLMV                      |
| PvampDIA1   | 1  | -----MWRLVPP-KLGRLSRSLK       | AA   | GSLLVLMV                      |
| MdomeDIA1   | 1  | -----MWRLVPP-KLGRLSRSLK       | AA   | GSLLVLMV                      |
| MmuscDIA1   | 1  | -----MWRLVPL-KLGRLSRALK       | AA   | GSLLVLM                       |
| RnorvDIA1   | 1  | -----MWRLVPL-KLGRLSRALK       | AA   | GSLLVLM                       |
| GgallDIA1   | 1  | -----MLRLVSL-KLGRLYRYVK       | AV   | GSAAALV                       |
| XtropDIA1   | 1  | -----MLRLASL-KFGRLEFRYAK      | VLF  | AAASLLVVML                    |
| BflorDIA1   | 1  | -----MRLVRLRQFRFFSGWR         | VRR  | MCGFFFFV                      |
| SsalaDIA1R  | 1  | -----MPL--KRCDQRAVGSVRLT--    | VCV  | LSWLCVCWAPS                   |
| DreriDIA1R  | 1  | -----MAG-----                 | I    | WSGVWLCFILVFG                 |
| RnorvDIA1R  | 1  | -----MELGRPGAAATAFRQRWPAWMLLW | ST   | LSCSFSLPA                     |
| MmuscDIA1R  | 1  | -----MESQWRGAAATAFHQHWLARLLW  | ST   | LSCSFSLPA                     |
| MmulaDIA1R  | 1  | -----MEP-QLGPEAAALRPGWLA-LLLW | V    | SALSCSFSLPA                   |
| HsapiDIA1R  | 1  | -----MEP-QLGPEAAALRPGWLA-LLLW | V    | SALSCSFSLPA                   |
| BtaurDIA1R  | 1  | -----MEP-RLGPKAAALHLGWPF-LLLW | V    | SGLSYSVSSPA                   |
| EcabaDIA1R  | 1  | -----MEP-WLGPEAAALRPGWPA-LLLW | V    | SALRCSVSSPA                   |
| DordiDIA1R  | 1  | -----MDP-QLGPEAAALHPGWQV-LLLW | V    | SVLSCFSSPA                    |
| MdomeDIA1R  | 1  | -----MES-VIHGPLASPCLGWLT--    | LLQ  | LVTLSCISSTES                  |
| OanatDIA1R  | 1  | -----MGL-RLGCRLFSAALSWMT--    | LLQ  | FLTRGHGPVADA                  |
| GgallDIA1R  | 1  | -----MGR--WICCLCSRVDWLM--     | LLL  | VLARSSNPSAAA                  |
| BflorDIA1Lb | 61 | IQELLAQGIIDEKRMREALRQKAEVHRI  | V    | KERGEALAKEAQAKAKANVVRINIHKPEL |
| BflorDIA1Lc | 1  | -----                         |      |                               |
| AaegyDIA1   | 1  | -----MSQHRILT                 | KLHL | VALFLWIVMKYQ                  |
| CpipiDIA1   | 1  | -----MSSGFQRILVNLHI           | L    | ALFCVIFEFQ                    |
| DyakuDIA1   | 1  | -----MHLSPGQLK                | V    | VLLALLQELQ                    |
| DerecDIA1   | 1  | -----MHLSPGQLK                | V    | VLLALLQELQ                    |
| DmelaDIA1   | 1  | -----MHLSHGQLK                | V    | VLLALLQELQ                    |
| DsechDIA1   | 1  | -----MHLSYGQLK                | V    | VLLALLQELQ                    |
| DpersDIA1   | 1  | -----MHLSPGHLR                | I    | VLLALLQDLQ                    |
| DpseuDIA1   | 1  | -----MHLSPGHLR                | I    | VLLALLQDLQ                    |
| DananDIA1   | 1  | -----MHLLSGQLR                | I    | VLLALLQDLQ                    |
| DwillDIA1   | 1  | -----MHLLYGQLK                | V    | VLLALLQELD                    |
| NvitrDIA1   | 1  | -----MLVTKASVSSFL             | I    | ALLILIL                       |
| SpurpDIA1L  | 40 | PSTNGKFRTFVPSKGRKRNLLHAGKQK   | EELG | FDSKDTRRTLQDIRTADKIGHPRIQA    |
| BflorDIA1La | 32 | LLVLSATLAVLYIYLVQVQGSPVWSL    | GQS  | QAGNKQKKDEYIVWRGEEQKVEVQKQEEK |
| CinteDIA1   | 1  | -----MLLKMKRYLTVWENGKYIV      | FIF  | LITLEVLL                      |
| AgambDIA1   | 1  | -----MQSSRLPYF                | V    | TLFIAVVLQYL                   |
| consensus   | 61 |                               | 1    | 1                             |

Signal  
peptide

|             |     |                                                     |                               |                |            |
|-------------|-----|-----------------------------------------------------|-------------------------------|----------------|------------|
| SpurpDIA1   | 32  | FVYYQ----                                           | LYLHFTANHLENEYFTEAT-----      | KCPACFGT--     | SLCKRFSRGD |
| NvectDIA1   | 32  | WLSYQDGRAIKWDFSSQHKLTFQETIGLN-----                  | KCPACFGINLSICHKLLGGG          |                |            |
| GaculDIA1   | 30  | MNTHS----                                           | LFASFQKNELTDRRFINLN-----      | KCPACFGT--     | SWCRKFMNGQ |
| OlatiDIA1   | 30  | MNTHN----                                           | LFASFQKNELTDRRFINLN-----      | KCPACFGT--     | SWCRKFMNGQ |
| TnigrDIA1   | 30  | MNTHN----                                           | LFASFQKNELTDRRFINLN-----      | KCPACFGT--     | SWCRKFMNGQ |
| TrubrDIA1   | 30  | MNTHN----                                           | LFASFQKNELTDRRFINLN-----      | KCPACFGT--     | SWCRKFMNGQ |
| DreriDIA1b  | 30  | MNTHN----                                           | LFASFQKNELTDRRFINLN-----      | KCPACFGT--     | SWCRKFMNGQ |
| DreriDIA1a  | 30  | MNTHN----                                           | LFASFQKNELTDRRFINLN-----      | KCPACFGT--     | SWCRKFMNGQ |
| BtaurDIA1   | 30  | LHSPS----                                           | LLASWQRNELADRRFLQLN-----      | KCPACFGT--     | SWCRRFLNGQ |
| PpygmDIA1   | 30  | LHSPS----                                           | LLASWQRNELADRRFLQLN-----      | KCPACFGT--     | SWCRRFLNGQ |
| CfamiDIA1   | 30  | LHSPS----                                           | LLASWQRNELADRRFLQLN-----      | KCPACFGT--     | SWCRRFLNGQ |
| PtrogDIA1   | 30  | LHSPS----                                           | LLASWQRNELADRRFLQLN-----      | KCPACFGT--     | SWCRRFLNGQ |
| TtrunDIA1   | 30  | LHSPS----                                           | LLASWQRNELADRRFLQLN-----      | KCPACFGT--     | SWCRRFLNGQ |
| HsapiDIA1   | 30  | LHSPS----                                           | LLASWQRNELTDRRFQLN-----       | KCPACFGT--     | SWCRRFLNGQ |
| MmulaDIA1   | 30  | LHSPS----                                           | LLASWQRNELTDRRFQLN-----       | KCPACFGT--     | SWCRRFLNGQ |
| PvampDIA1   | 30  | LHSPS----                                           | LLASWQRNELADRRFLQLN-----      | KCPACFGT--     | SWCRRFLNGQ |
| MdomeDIA1   | 30  | LHSPS----                                           | LLASWQRNELADRRFLQLN-----      | KCPACFGT--     | SWCRRFLNGQ |
| MmuscdIA1   | 30  | LHSPS----                                           | LLASWQRNELADRRFLQLN-----      | KCPACFGT--     | SWCRRFLNGQ |
| RnorvDIA1   | 30  | LHSPS----                                           | LLASWQRNELADRRFLQLN-----      | KCPACFGT--     | SWCRRFLNGQ |
| GgallDIA1   | 30  | LNTHS----                                           | LLASLQRNELAERRFLQLN-----      | KCPACWGT--     | SWCRKFLNGQ |
| XtropDIA1   | 30  | LNTHS----                                           | LLSSFQRNELTDRRFSLN-----       | KCPACFGT--     | SWCRKFMNGQ |
| BflorDIA1   | 30  | FFYCF----                                           | VFQPFYSYNQLTDTTFLGED-----     | KCPACFGT--     | DLCEEFENGK |
| SsalaDIA1R  | 33  | VVEPAGT--                                           | PPAPQKALILQRAFLGLD-----       | KCNACVGT--     | SICKKLLKDQ |
| DreriDIA1R  | 19  | TADPS----                                           | PAPQDKSHDFRKIFLGLD-----       | KCNACVGT--     | SICKKFFKDE |
| RnorvDIA1R  | 37  | SLPPSL----                                          | VPRVRSYTLGKTFGLD-----         | KCNACVGT--     | SICKKFFKKE |
| MmuscdIA1R  | 37  | SLPPSL----                                          | VPRVRSYTMGKTFGLD-----         | KCNACVGT--     | SICKKFFKKE |
| MmulaDIA1R  | 35  | SSPSSL----                                          | VSQVRTSYNFGRTFLGLD-----       | KCNACVGT--     | SICKKFFKKE |
| HsapiDIA1R  | 35  | SSLSSL----                                          | VPQVRTSYNFGRTFLGLD-----       | KCNACVGT--     | SICKKFFKKE |
| BtaurDIA1R  | 35  | SPSPSP----                                          | VSRVRTSYNLGKTFGLD-----        | KCNACVGT--     | SICKKFFKKE |
| EcabaDIA1R  | 35  | SPSPSL----                                          | VPRVRTSYNFGRTFLGLD-----       | KCNACVGT--     | SICKKFFKKE |
| DordiDIA1R  | 35  | SPPPSL----                                          | VSRVRTSYNLGRTFLGLD-----       | KCNACVGT--     | SICKKFFKKE |
| MdomeDIA1R  | 34  | LTAPSS----                                          | VPRVKSSYNFGRTFLGLD-----       | KCNACVGT--     | SICKKFFKKE |
| OanatDIA1R  | 34  | SPAPSL----                                          | VPRVKPSYSFGRTFLGLD-----       | KCNACVGT--     | SICKKFFKKE |
| GgallDIA1R  | 33  | TASPS----                                           | APHVRPSYSFGRTFLGLD-----       | KCNACVGT--     | SICKKFFKKE |
| BflorDIA1Lb | 121 | NPENQHSWKAIEKMAAHDEIEDHKKQPEQYMTFKRLMDAKKCPACYGES-- | LCEQAEVG-                     |                |            |
| BflorDIA1Lc | 1   | -----                                               | MVIADGDNDIDISWAEPE-----       | KCPACFGD--     | KCELLRRGH  |
| AaegyDIA1   | 25  | PEERA-----                                          | SSLKSLVQQCOYDTTI-----         | LCPACFPRP--    | VNCSFFENLK |
| CpipiDIA1   | 27  | PKEPE-----                                          | SLTELLVNQCEYETQH-----         | LCPACFVSP--    | VNCGHLANFV |
| DyakuDIA1   | 22  | VKPQ-----                                           | REVFQELFEKDLR-----            | LCPNCFVQREL--  | CGEIFQKI   |
| DerecDIA1   | 22  | VKPQ-----                                           | REVFQELFEKDLR-----            | LCPNCFVQSEL--  | CGEIFQKI   |
| DmelaDIA1   | 22  | VKPQ-----                                           | REVFQELFEKDLR-----            | LCPNCFVQSEPC-- | CGEIFQKI   |
| DsechDIA1   | 22  | VKTQ-----                                           | REVFQELFEKDLR-----            | LCPNCFVQKEQC-- | CGEIFQKI   |
| DpersDIA1   | 22  | VKPQ-----                                           | KDIFRAHLERDLQ-----            | LCPACFAGQRWQ-- | CEEIFEAI   |
| DpseuDIA1   | 22  | VKPQ-----                                           | KDIFRAHLERDLQ-----            | LCPACFAGQRWQ-- | CEEIFEAI   |
| DananDIA1   | 22  | VKPQ-----                                           | KDIFQEHFESDLR-----            | LCPACFSAQREQ-- | CEEVFRAI   |
| DwillDIA1   | 22  | VRTQ-----                                           | KDIFRKHFNDL-----              | ECPQCFVQREQ--  | CEKFFDTI   |
| NvitrDIA1   | 21  | GIYI-----                                           | NRFNLKVAEITER-----            | YKCPACFGD--    | SMCQVIDSNE |
| SpurpDIA1L  | 100 | GDETALTQDGVQGMKNATVVMTTTRIQFEN--                    | LFPSLLEEERCPLCYGT--           | TNCDQIYAGN     |            |
| BflorDIA1La | 92  | KHPAEEP--                                           | KEKPRQDKSAVTERKPKGVPRLLRN---- | APCPACVGD--    | NLCEEFEDGM |
| CinteDIA1   | 32  | EMYNHRSQGSTRVMLEAKLLSDKWSATSP-----                  | TCGNFSCFGT--                  | SLCKNRNRVG     |            |
| AgambDIA1   | 22  | PNEKS-----                                          | TSKRPLENVCDYDRN-----          | ILCPACVSSG--   | LECNKFDLDF |
| consensus   | 121 |                                                     | f l l                         | c a c g        | C          |

Motif 1

Motif 2

|             |     |                                                              |
|-------------|-----|--------------------------------------------------------------|
| SpurpDIA1   | 74  | YRFHSYSSIR-----LFDYVN-VKNVYFATYLD----QKP-VVMKKLGHNSEHNQFDK   |
| NvectDIA1   | 80  | VTVKSN---T-----PWSEER-IKGVSYGLWGA----VKQRVVLKTLGTSSSELTAFDN  |
| GaculDIA1   | 72  | VSFETWGRRLR-----FLDVFN-VKNVYFAQYGEPEGTRR-VVLKRLGNSQELAEIDQ   |
| OlatiDIA1   | 72  | VSFETWGRRLR-----FLDVFN-VKNVYFAQYGEPEGTRR-VVLKRLGNSQELAEIDQ   |
| TnigrDIA1   | 72  | VSFETWGRRLR-----FLDVFN-VKNVYFAQYGEPEGTRR-VVLKRLGNSQELADIDQ   |
| TrubrDIA1   | 72  | VSFETWGRRLR-----FLDVFN-VKNVYFAQYGEPEGTRR-VVLKRLGNSQELADIDQ   |
| DreriDIA1b  | 72  | ISFETWGRRLR-----FLDVFN-VKNVYFAQYGEPEGTRR-IVLKRLGNSQELADIDQ   |
| DreriDIA1a  | 72  | VTFEMWGRRLR-----FLDFFN-VKNVYFAQYGEPEGTRR-VVLKRLGNSQELAEIDQ   |
| BtaurDIA1   | 72  | VVFEAWGRRLR-----LLDFFN-VKNVYFAQYGEPEGTRR-VVLKRLGNSQELAEIDQ   |
| PpygmDIA1   | 72  | VVFEAWGRRLR-----LLDFFN-VKNVYFAQYGEPEGTRR-VVLKRLGNSQELAEIDQ   |
| CfamiDIA1   | 72  | VVFEAWGRRLR-----LLDFFN-VKNVYFAQYGEPEGTRR-VVLKRLGNSQELAEIDQ   |
| PtrogDIA1   | 72  | VVFEAWGRRLR-----LLDFFN-VKNVYFAQYGEPEGTRR-VVLKRLGNSQELAEIDQ   |
| TtrunDIA1   | 72  | VVFEAWGRRLR-----LLDFFN-VKNVYFAQYGEPEGTRR-VVLKRLGNSQELAEIDQ   |
| HsapiDIA1   | 72  | VVFEAWGRRLR-----LLDFFN-VKNVYFAQYGEPEGTRR-VVLKRLGNSQELAEIDQ   |
| MmulaDIA1   | 72  | VVFEAWGRRLR-----LLDFFN-VKNVYFAQYGEPEGTRR-VVLKRLGNSQELAEIDQ   |
| PvampDIA1   | 72  | VVFEAWGRRLR-----LLDFFN-VKNVYFAQYGEPEGTRR-VVLKRLGNSQELAEIDQ   |
| MdomeDIA1   | 72  | VAFEAWGRRLR-----LLDFFN-VKNVYFAQYGEPEGTRR-VVLKRLGNSQELAEIDQ   |
| MmuscdIA1   | 72  | VGFEAWGRRLR-----LLDFFN-VKNVYFAQYGEPEGTRR-VVLKRLGNSQELAEIDQ   |
| RnorvDIA1   | 72  | VGFEAWGRRLR-----LLDFFN-VKNVYFAQYGEPEGTRR-VVLKRLGNSQELAEIDQ   |
| GgallDIA1   | 72  | LRLESWGRRLR-----LFDFFN-VKNVYFAQYGEPEGTRR-VVLKRLGNSQELAEIDQ   |
| XtropDIA1   | 72  | LSFEGWGRRLR-----LLDFFN-VKNVYFAQYGEPEGTRR-VVLKRLGNSQELAEIDQ   |
| BflorDIA1   | 72  | ILFKYSSRLR-----ILDIFN-IKNVYFAIY----EGME--VALKRLGHNSEHFDQLDR  |
| SsalaDIA1R  | 77  | IRFDWWMSPD-----TTLPLA-EKQSFPCNLTDDSLSWRP-VVLSFLSSPCLHSSSDR   |
| DreriDIA1R  | 60  | IRFERRLTAQ-----SNLSSA-DVRSYECNYTDSTAGWRP-VVVSRLMSPHLHQLSDN   |
| RnorvDIA1R  | 79  | IRLDNSLVSH-----LGLPSQ-DLLSYAANYSDDSKTWRP-VEISRLVSKYQSEISDK   |
| MmuscdIA1R  | 79  | IRFDNSLASH-----LGLPPQ-DLHSYAANYSDDSKTWRP-VEISRLVSKYQSEISDR   |
| MmulaDIA1R  | 77  | IRSDNWLASH-----LGLPPD-FLLSYAANYSDDSKIWRP-VEIFRLVSNYQNEISDR   |
| HsapiDIA1R  | 77  | IRSDNWLASH-----LGLPPD-SLLSYAANYSDDSKIWRP-VEIFRLVSKYQNEISDR   |
| BtaurDIA1R  | 77  | IRFDNGLALH-----LGPDPD-DLPSYAANYSDDFKTWRP-VEISRLVSKQONKISDG   |
| EcabaDIA1R  | 77  | IRFDNRLASH-----LGLPSG-YLPSYAANYSDDSKTWRP-VEVSRLVSKQNEISDR    |
| DordiDIA1R  | 77  | IRFDNSLASH-----LGLPSG-YLPSYAANYSDDSKTWRP-VEVSRLVSKQNEISDR    |
| MdomeDIA1R  | 76  | IRFDNWLASH-----LKLPPD-YFSTYPAANYSDDTKSWRP-VEISRLISKYQHELSDR  |
| OanatDIA1R  | 76  | IRFDNWPASH-----LKLPPD-HFPGYSAANYTDDSKSWRL-VEISRLIGKDQNELSDQ  |
| GgallDIA1R  | 74  | IRFDTWLSSH-----LKLPPS-YLLSYLGNYTDDAQSWRM-VDITRLITTKYQHADRADQ |
| BflorDIA1Lb | 178 | LITMDVADKT-----LEHKG--VYFGHFRNT-----E----VVAKRLVGGKDGWTRFDE  |
| BflorDIA1Lc | 36  | FVKVDSESDR-----YMKKGI-VSTGRICGV-----K----VIAKSMNEAGAWQRYER   |
| AaegyDIA1   | 65  | SIDS----NE-----LFEELL-THFNQHCVRYGTLGSGSEQRVVIKLNKEHGVEELIS   |
| CpipiDIA1   | 68  | TIDS----SN-----PWNQLT-CRYNPHCVSYG-LLGSGQKVVIKTLNKNRAVEALRD   |
| DyakuDIA1   | 59  | AEPSDW--SK-----LLKAIS-LLVDRRAIYFLRFLKQDQ-----VVAKRKIIDAQNQ   |
| DerecDIA1   | 59  | AEPSDW--SK-----LLKAIS-LIVDRRAIYFLRFLKQDQ-----VVAKRKIIDARNH   |
| DmelaDIA1   | 59  | AEPSDW--SR-----LVKAIS-LLVDRRAIYFLRFLKDRDQEV-Q-LVAKRKIIDAQSN  |
| DsechDIA1   | 59  | AEPSDW--SR-----LVKAIS-LLVDRRAIHYLRLKQDQAV-Q-LVAKRKIIDAHSY    |
| DpersDIA1   | 59  | AEPSDW--SK-----LLKGIA-LLIDREIYFLQLNERHQAA-Q-LVAKRDAIGGHSY    |
| DpseuDIA1   | 59  | AEPSDW--SK-----LLKGIA-LLIDREIYFLQLNERHQAA-Q-LVAKRDAIGGHSY    |
| DananDIA1   | 59  | REPSDL--SK-----LWKAVT-LLFDRREIYFLWLEIGPSQEKSSQ-LLAKRKSIVASHQ |
| DwillDIA1   | 59  | EPAKL--DR-----LWKDLT-LLVDPREIYFLWLELNENREN-VK-CLAKRKMTRKISK  |
| NvitrDIA1   | 57  | ISFEYTDYFS-----IFNNLFSVKNVYCYKYKD-----KKVIMKKLAQSEELKTFDE    |
| SpurpDIA1L  | 156 | ISFHVGS--S-----VNLSEP---HAIRCTWGD-----RRIVGKRLVSRVFERLEK     |
| BflorDIA1La | 144 | IDLG-----SEVTSWKVKAYCTWD-----KVEVMVTQCASEERLERFEE            |
| CinteDIA1   | 81  | LSEDVPTLRSGWLSIYGELVDLHRVKNLVTYKLPSTLPCNGETCSVQIETSVLSGNNVNK |
| AgambDIA1   | 62  | TLQDDN-----VFNIIN-NIFNSHTTRIGTIVQENKLAVMKHLNRDNTIEKLLQ       |
| consensus   | 181 | a y l                                                        |

### Motif 3

|             |     |                |                                                   |
|-------------|-----|----------------|---------------------------------------------------|
| SpurpDIA1   | 121 | DLCTNAES-GLRG  | CDVSQQIYKSKLS-----DIMYAERLEEKDVMG---L-SDIVRCP     |
| NvectDIA1   | 125 | EICRGVVGK-DSN  | CKISQEAWDS-----DVLVPKPPLQDAVR-----KYFDCPS         |
| GaculDIA1   | 123 | KICKRATG-RPR   | CDLIQAMYKTEFA-----RINGDVRLLTPEVVEG--W-SDLVHCPS    |
| OlatiDIA1   | 123 | KICKRATG-RPR   | CDLVQAMYKTEFA-----RINGDVRLLTDPVVEG--W-SDLVHCPS    |
| TnigrDIA1   | 123 | KICKRATG-RPR   | CDLIQAMYKTEFA-----RINGDVRLLTDPVVEG--W-SDLVHCPS    |
| TrubrDIA1   | 123 | KICKRATG-RPR   | CDLIQAMYKTEFA-----RINGDVRLLTPEVVEG--W-SDLVHCPS    |
| DreriDIA1b  | 123 | KICKRATG-RPR   | CDLIQAMYKTEFA-----RLNGDVRLLTDPVVEG--W-SDLVHCPS    |
| DreriDIA1a  | 123 | KICKRATG-RPR   | CDLIQSMYKTEFA-----RLNGDVRLLTPEVVEG--W-SDLVHCPS    |
| BtaurDIA1   | 124 | SICKRATG-RPR   | CDLLQAMPRTTEFA-----RLNGDVRLLTPEAVEG--W-SDLVHCPS   |
| PpygmDIA1   | 124 | SICKRATG-RPR   | CDLLQAMPRTTEFA-----RLNGDVRLLTPEAVEG--W-SDLVHCPS   |
| CfamiDIA1   | 124 | SICKRATG-RPR   | CDLLQAMPRTTEFA-----RLNGDVRLLTPEAVEG--W-SDLVHCPS   |
| PtrogDIA1   | 124 | SICKRATG-RPR   | CDLLQAMPRTTEFA-----RLNGDVRLLTPEAVEG--W-SDLVHCPS   |
| TtrunDIA1   | 124 | SICKRATG-RPR   | CDLLQAMPRTTEFA-----RLNGDVRLLTPEAVEG--W-SDLVHCPS   |
| HsapiDIA1   | 124 | SICKRATG-RPR   | CDLLQAMPRTTEFA-----RLNGDVRLLTPEAVEG--W-SDLVHCPS   |
| MmulaDIA1   | 124 | SICKRATG-RPR   | CDLLQAMPRTTEFA-----RLNGDVRLLTPEAVEG--W-SDLVHCPS   |
| PvampDIA1   | 124 | SICKRATG-RPR   | CDLLQAMPRTTEFA-----RLNGDVRLLTPEAVEG--W-SDLVHCPS   |
| MdomeDIA1   | 124 | SICKRATG-RPR   | CDLLQAMPKTEFA-----RLNGDVRLLTPEAVEG--W-SDLVHCPS    |
| MmuscDIA1   | 124 | SICKRATG-RPR   | CDLLQAMPRTTEFA-----RLNGDVRLLTPEAVEG--W-SDLVHCPS   |
| RnorvDIA1   | 124 | SICKRATG-RPR   | CDLLQAMPRTTEFA-----RLNGDVRLLTPEAVEG--W-SDLVHCPS   |
| GgallDIA1   | 123 | KICRRATG-RGR   | CDLLQALHATEFA-----SLNGDVRLLTPEAVEG--W-SDLVHCPS    |
| XtropDIA1   | 123 | RICKKATG-RPR   | CDLVQAMYKTDFEFA-----RLNGDVRLLTDPVVEG--W-SDLVHCPS  |
| BflorDIA1   | 118 | WICETGKE-GPQ   | CHIPSVTYYSNFS-----RVIYEG--LSPKSLGD--M-SDMVRCP     |
| SsalaDIA1R  | 128 | SICRSVGR-QGP   | CSIEAVLRVTPRF-----QSLNQSHLLLPHIVKG--LAPPLLRCP     |
| DreriDIA1R  | 111 | SICTSAGK-GKS   | CSIEGVLRSRFR-----QTWVHSNLLLPSMKVKG--LVTPLMRCP     |
| RnorvDIA1R  | 130 | RICASASG-PKT   | CSIERILRKTGRF-----QKWLQAKRLTPDLVQG--LPSPFLHCP     |
| MmuscDIA1R  | 130 | RICASVSA-PKT   | CSIERILQKTGRF-----QKWLQAKRLTPDLVQG--LPSPFLRCP     |
| MmulaDIA1R  | 128 | RICASASA-PRT   | CSIERVLRKTERF-----QKWLQAKRLTPDLVQG--LASPLLRCP     |
| HsapiDIA1R  | 128 | RICASASA-PKT   | CSIERVLRKTERF-----QKWLQAKRLTPDLVQG--LASPLLRCP     |
| BtaurDIA1R  | 128 | RICASAAA-PKT   | CSIERVLRKTGRF-----QKWLQAKRLTPDLVQG--LSSPLLRCP     |
| EcabaDIA1R  | 128 | RICAFAAA-PKT   | CSIERVLRKTRRF-----QKWLQAKRLTPDLVQG--LPSPLLRCP     |
| DordiDIA1R  | 128 | RICAFASA-PKT   | CSIERILRKTGRF-----QKWLQAKRLTPDLVQG--LPSPFLRCP     |
| MdomeDIA1R  | 127 | RICASASG-SKT   | CSIERVLRKTERV-----KKWLKAKRLTPDLVQG--LPSPLMRCP     |
| OanatDIA1R  | 127 | KICTSVSL-VKT   | CSIERVLRKTERF-----QKWLKARRLTPALVQG--LPSLLRCPT     |
| GgallDIA1R  | 125 | HICTSLLK-TKT   | CSLERALRRTHRF-----QKWLRAKRLTPDLVQG--LSSPLMRCP     |
| BflorDIA1Lb | 220 | FICQNASL-PKD   | CDVSHMISDTVLVTDNVLQVSFLQDAWRIAHTRS---I--AMEACMT   |
| BflorDIA1Lc | 79  | FICRSSSR-PHV   | CNASSFILETMLVTDVALKVPWLREAWKICHLEKS----ALSCLVS    |
| AaegyDIA1   | 113 | SICNDLKI-YR-NC | RLRNKEPYLRVL-----RQRVLNDN--QLEGAILCPL             |
| CpipiDIA1   | 115 | AVCDELGL-TQSN  | CKFKSDENTLKVLE-----RRKVL-EQ--ELEGICICPS           |
| DyakuDIA1   | 104 | Q-IKDVKK-AF    | -----YELGE--RPGGFHLCRT                            |
| DerecDIA1   | 104 | K-AENVEK-AF    | -----YEQEE--RPGGFHLCRT                            |
| DmelaDIA1   | 107 | Q-IKNVKK-DF    | -----YELVEE--RPGGFHLCRT                           |
| DsechDIA1   | 107 | Q-MKNVKK-AF    | -----YELVEE--RPGGFHLCRT                           |
| DpersDIA1   | 107 | RNMGILRE-AF    | -----LEMEE--RPGGFQLCRS                            |
| DpseuDIA1   | 107 | RNMGILGE-AF    | -----LEMEE--RPGGFQLCRS                            |
| DananDIA1   | 108 | S-LSSLQE-EF    | -----LNLEE--RPGGFHLCRT                            |
| DwillDIA1   | 107 | D-----         | -----LHF--NPGGFQMCRN                              |
| NvitrDIA1   | 104 | MICSDDEL-HEL   | CYQSESRKQDSKTN-----FYKLVESELANVGGD--INNMKRLCPT    |
| SpurpDIA1L  | 197 | IICNQSQVDPKRS  | CEVNAAATNSWMSKS----SALNRVHKLHQEVYESQLIAISATTCAS   |
| BflorDIA1La | 184 | FVCRNLSETATS   | CDPGKVLLQEDLK-----ERLQP----AHLKSLR                |
| CinteDIA1   | 141 | WICDKFKKPTN    | ---CDTGKVFKSWRAMN-----KITSAGRRLDPNLKLD--I-SPPLQCP |
| AgambDIA1   | 110 | EYCDAYS�TKQN   | ---CRWAQHDSVDR-----AKEFITTSILDS-ARVEGCIFCPA       |
| consensus   | 241 | ic             | c v c s                                           |

Motif 4

Motif 5 ...



|             |     |                                                                 |
|-------------|-----|-----------------------------------------------------------------|
| SpurpDIA1   | 221 | FPAYMGACGRFTVQEYSG-HSLSYFYKFK--FGVRAALAVQALKIAEQISENRDEFALYL    |
| NvectDIA1   | 217 | FPRFYGVCGRIMVVEDSG-PPISSFLEES--WDVRAQIAVNLIITLAHQISSALDDWALYI   |
| GaculDIA1   | 228 | FAKYLGACGRMVAVNYVG-EELWSFYFNAP--WEKRVDLARQLMDIAEQITNNDFFDFALYL  |
| OlatiDIA1   | 228 | FAKYLGACGRMVAVNYVG-EELWNFYFNAP--WEKRVDLARQLMDIAEQITNNDFFDFALYL  |
| TnigrDIA1   | 228 | FAKYLGACGRMVAVNYVG-EELWSFYFNAP--WEKRVDLARQLMDIAEQITNNDFFDFALYL  |
| TrubrDIA1   | 228 | FAKYLGACGRMVAVNYVG-EELWSFYFNAP--WEKRVDLARQLMDIAEQITNNDFFDFALYL  |
| DreriDIA1b  | 228 | FAKYLGACGRMVAVNYVG-EELWSFYFNAP--WEKRVDLAKQLMDIAEQITNNDFFDFALYL  |
| DreriDIA1a  | 228 | FAKYLGACGRMVAVNYVG-EELWSFYFNAP--WEKRVDLAKQLMDIAEQITNNDFFDFALYL  |
| BtaurDIA1   | 229 | FAKYLGACGRMVAVNYVG-EELWSFYFNAP--WEKRVDLAWQLMEIAEQITNNDFFDFALYL  |
| PpygmDIA1   | 229 | FAKYLGACGRMVAVNYVG-EELWSFYFNAP--WEKRVDLAWQLMEIAEQITNNDFFDFALYL  |
| CfamIDIA1   | 229 | FAKYLGACGRMVAVNYVG-EELWSFYFNAP--WEKRVDLAWQLMEIAEQITNNDFFDFALYL  |
| PtrogDIA1   | 229 | FAKYLGACGRMVAVNYVG-EELWSFYFNAP--WEKRVDLAWQLMEIAEQITNNDFFDFALYL  |
| TtrunDIA1   | 229 | FAKYLGACGRMVAVNYVG-EELWSFYFNAP--WEKRVDLAWQLMEIAEQITNNDFFDFALYL  |
| HsapiDIA1   | 229 | FAKYLGACGRMVAVNYVG-EELWSFYFNAP--WEKRVDLAWQLMEIAEQITNNDFFDFALYL  |
| MmulaDIA1   | 229 | FAKYLGACGRMVAVNYVG-EELWSFYFNAP--WEKRVDLAWQLMEIAEQITNNDFFDFALYL  |
| PvampDIA1   | 229 | FAKYLGACGRMVAVNYVG-EELWSFYFNAP--WEKRVDLAWQLMEIAEQITNNDFFDFALYL  |
| MdomeDIA1   | 229 | FAKYLGACGRMVAVNYVG-EELWSFYFNAP--WEKRVDLAWQLMEIAEQITNNDFFDFALYL  |
| MmuscDIA1   | 229 | FAKYLGACGRMVAVNYVG-EELWSFYFNAP--WEKRVDLAWQLMEIAEQITNNDFFDFALYL  |
| RnorvDIA1   | 229 | FAKYLGACGRMVAVNYVG-EELWSFYFNAP--WEKRVDLAWQLMEIAEQITNNDFFDFALYL  |
| GgallDIA1   | 228 | FAKYLGACGRMVAVNYVG-EELWSFYFNAP--WEKRVDLAWQLMEIAEQITNNDFFDFALYL  |
| XtropDIA1   | 228 | FAKYLGACGRMVAVNYVG-EELWSFYFNAP--WEKRVDLAWQLMEIAEQITNNDFFDFALYL  |
| BflorDIA1   | 218 | FPFYFGACGRLLTVVQKCD-KTLASYYSAP--WLKRVELSLQMMKIAEYLTNNEADFGLYL   |
| SsalaDIA1R  | 234 | FPRYQGS CGRLMVWASS--RPLWGLYGS SREFVQRVDVAYQLLHITQGLGHNSLGFLLYY  |
| DreriDIA1R  | 217 | FLRYHGS CGRLMVWAAS--RALRTLFS SP--LERRADLAYQLLHITQSLSANS LRFRLFY |
| RnorvDIA1R  | 236 | MPKYLGS CGRFLVSTST--RPLQEFYDAP--PEQAADLAYQLLGVLES LRSNDLN YFFYF |
| MmuscDIA1R  | 236 | MPRYLGS CGRFLVSTST--RPLQEFYDAS--PEQAADLAYQLLRVLES LRSNDLN YFFYF |
| MmulaDIA1R  | 234 | LPQYLGSCGRFLVSTST--RPLQEFYDAP--PDQAADLAYQLLGVLES LRSNDLN YFFYF  |
| HsapiDIA1R  | 234 | LPKYLGS CGRFLVSTST--RPLQEFYDAP--PDQAADLAYQLLGVLES LRSNDLN YFFYF |
| BtaurDIA1R  | 234 | LPQYLGSCGRFLVSTST--SPLQEFYDAP--PDQAADLAYQLLGVLES LRSNDLN YFFYF  |
| EcabaDIA1R  | 234 | LPRYLGSCGRFLVSTST--SPLQEFYDAP--PDQAADLAYQLLGVLES LRSNDLN YFFYF  |
| DordiDIA1R  | 234 | LPKYLGS CGRFFVSTST--RPLQEFYDAP--PDEAADLAYQLLGVLES LRSNDLN YFFYF |
| MdomeDIA1R  | 233 | LPRYLGSCGRFLVSTST--QPLEEFYSSP--ADQAADLAYQLLGLDLS LRNDLN YFFYF   |
| OanatDIA1R  | 233 | FPKYLGS CGRFLVSTST--TPLLELSSGP--PDRAADLGHQLLGVIEFLRHNDWN YFFYF  |
| GgallDIA1R  | 231 | FPRYLGSCGRLLVVSAST--RPLRDFRFAA--PEVAADLALQLLAVLHSMGTNDLN YFFYF  |
| BflorDIA1Lb | 326 | FPKYLGACGRVLLVESGG-KLLGSAIESP--WKERANIALQLLEMDKFRNGDPKVVVIF     |
| BflorDIA1Lc | 187 | FPKFYACGRVTVVEHAG-RTLDTFMESS--WEVRADIALQLLQVDAIREKDPD VWLFF     |
| AaegyDIA1   | 197 | VPKLIFQGGFTLVESYEG-EALAKYDRP--LNVRLLIANELIKASLNF TAGVDNFRFYL    |
| CpipiDIA1   | 199 | VPKVFQGGFQLFESFDG-DALVNFYDSS--LNIRLRIAKELIQASFLETEGVNGFRFYL     |
| DyakuDIA1   | 171 | VPTTYASCGLTHFQSYAG-RTL TN YFEGE--EDLRVELALQLMQLSLKLTFGFSDFRIML  |
| DerecDIA1   | 172 | VPTTYASCGLTHFQAYAG-RTL TN YFEAE--EGLRMELALQLIQLSLKLTFGFSDFRIFL  |
| DmelaDIA1   | 174 | VPTTYASCGLTHFQSNAG-RTLAHYVDAE--EGLRVELALQLIQLSLKLTFGFADFRIFL    |
| DsechDIA1   | 176 | VPTPYASCGLTHFQSYAG-RTLAHYVNAE--EGLRLELALQLIQLSLKLTFGFADFRIFL    |
| DpersDIA1   | 175 | VPRSYAACGLTHFQAYAG-RTL VHYATAG--ENLRLEMARQLLQLSLKLTFGFADFRIFL   |
| DpseuDIA1   | 175 | VPRSYAACGLTHFQAYAG-RTL VHYATAG--ENLRLEMARQLLQLSLKLTFGFADFRIFL   |
| DananDIA1   | 175 | VPNTYAI CGLTHFQAYAG-RTL NHYTEAA--EDLRREIARQLIHL SLKLTFGFADFRIFL |
| DwillDIA1   | 161 | VPRSFVAVCGSTLVFQAYAG-STLSNYLKAP--IDLRLMAKQLLQALKLSAGFKGFRIFL    |
| NvitrDIA1   | 203 | TPKYFGACGRLLVEEYIG-LPLSSFIDEP--WIRRAKIASLLQAADTLMSKNSEFAFYL     |
| SpurpDIA1L  | 306 | FTEYLGECGRVLLTEPSG-KPLSSYLKAS--WKDRVDISLKIQLMIEDFDHSSDKWLVL     |
| BflorDIA1La | 272 | IPAFLGACGNLVATETAG-KPLSMYLEVKGPWQVRANLSLQLLQMLDDFQNKDPDWLLMF    |
| CinteDIA1   | 245 | FQRTVGS CGALMVHGRSIVTSLYELYDAP--WKVRLDVAIQLLDLAEHFTYNDLN YMFAL  |
| AgambDIA1   | 207 | VPKLLHTFGFSIETYEG-KTLEHYDFP--FVTRMRIAELIRAGFKFTEGIHGFRVFL       |
| consensus   | 361 | g c G m l y r dla qlm i l f ly                                  |

... Motif 7

Motif 8

Motif 9

Motif 10 ...

|             |     |                      |                                          |                         |
|-------------|-----|----------------------|------------------------------------------|-------------------------|
| SpurpDIA1   | 278 | TDVSEDNLAVND-NG----  | EVLVIDAENIIVVDRKKIKEDANPGWDVKH----       | QSEHEG                  |
| NvectDIA1   | 274 | ADPAPGNFVSD-SG----   | KVTLLDLEHLVVVDLSEVQMEENDKPKPS-----       | D                       |
| GaculDIA1   | 285 | LDVSFDNFVAVGPRDG---- | KVIIVVDAENVLVADKRLIKQNKPEFVWY-----       | ESRFEE                  |
| OlatiDIA1   | 285 | LDVSFDNFVAVGPRDG---- | KVIIVVDAENVLVADKRLIKQNKPEYDVWY-----      | ESRFEE                  |
| TnigrDIA1   | 285 | LDVSFDNFVAVGPRDG---- | KVIIVVDAENVLVADKRLIKQNKPENFVWY-----      | ESRFEE                  |
| TrubrDIA1   | 285 | LDVSFDNFVAVGPRDG---- | KVIIVVDAENVLVADKRLIKQNKPENYDVWY-----     | ESRFEE                  |
| DreriDIA1b  | 285 | LDVSFDNFVAVGPRDG---- | KVIIVVDAENVLVADKRLIKQNKPEYDVWY-----      | ESRFEE                  |
| DreriDIA1a  | 285 | LDVSFDNFVAVGPRDG---- | KVIIVVDAENVLVADKRLVQNKPEYDVWY-----       | ESRYEE                  |
| BtaurDIA1   | 286 | LDVSFDNFVAVGPRDG---- | KVIIVVDAENVLVADKRLIRQNKPENWDVWY-----     | ESKFDD                  |
| PpygmDIA1   | 286 | LDVSFDNFVAVGPRDG---- | KVIIVVDAENVLVADKRLIRQNKPENWDVWY-----     | ESKFDD                  |
| CfamIDIA1   | 286 | LDVSFDNFVAVGPRDG---- | KVIIVVDAENVLVADKRLIRQNKPENWDVWY-----     | ESKFDD                  |
| PtrogDIA1   | 286 | LDVSFDNFVAVGPRDG---- | KVIIVVDAENVLVADKRLIRQNKPENWDVWY-----     | ESKFDD                  |
| TtrunDIA1   | 286 | LDVSFDNFVAVGPRDG---- | KVIIVVDAENVLVADKRLIRQNKPENWDVWY-----     | ESKFDD                  |
| HsapiDIA1   | 286 | LDVSFDNFVAVGPRDG---- | KVIIVVDAENVLVADKRLIRQNKPENWDVWY-----     | ESKFDD                  |
| MmulaDIA1   | 286 | LDVSFDNFVAVGPRDG---- | KVIIVVDAENVLVADKRLIRQNKPENWDVWY-----     | ESKFDD                  |
| PvampDIA1   | 286 | LDVSFDNFVAVGPRDG---- | KVIIVVDAENVLVADKRLIRQNKPENWDVWY-----     | ESKFDD                  |
| MdomeDIA1   | 286 | LDVSFDNFVAVGPRDG---- | KVIIVVDAENVLVADKRLIRQNKPENWDVWY-----     | ESKFDD                  |
| MmuscDIA1   | 286 | LDVSFDNFVAVGPRDG---- | KVIIVVDAENVLVADKRLIRQNKPENWDVWY-----     | ESKFDD                  |
| RnorvDIA1   | 286 | LDVSFDNFVAVGPRDG---- | KVIIVVDAENVLVADKRLIRQNKPENWDVWY-----     | ESKFDD                  |
| GgallDIA1   | 285 | LDVSFDNFVAVGPRDG---- | KVIIVVDAENVLVADKRLIRQNKPENWDVWY-----     | ESKFDD                  |
| XtropDIA1   | 285 | LDVSFDNFVAVGPRDG---- | KVIIVVDAENVLVADKRLIKQNKPENWDVWY-----     | ESKFDD                  |
| BflorDIA1   | 275 | TDISYENFVTS-DG----   | NLFVIDVENVVVDKQKIKADKPRNWEARY-----       | QSHFDE                  |
| SsalaDIA1R  | 292 | TRLGEDMFGILD-DQ----  | RVFITDASSIGVIDLEQGFPPDPPS-QTGS-----      | DGDIFS                  |
| DreriDIA1R  | 273 | TRIPEDMFGILE-DN----  | KVFIVDTSTIGVIDLQEGHPPDK-D-LLPE-----      | ELDVFS                  |
| RnorvDIA1R  | 292 | THVDAGMFGIFD-NG----  | HLFIRDASALGVIDKQEASQAAD---RTGE-----      | NEDIFS                  |
| MmuscDIA1R  | 292 | THVDAGMFGIFD-NG----  | HLFIRDASALGVIDKQEGSQAAA---RTGE-----      | NEDIFS                  |
| MmulaDIA1R  | 290 | THIDAGMFGVFN-NG----  | HLFIRDASAVGVIDKQEGSQEAT---RAGE-----      | NKDIFS                  |
| HsapiDIA1R  | 290 | THIDAGMFGVFN-NG----  | HLFIRDASAVGVIDKQEGSQEAN---RAGE-----      | NKDIFS                  |
| BtaurDIA1R  | 290 | THVDADMFGIFN-NG----  | HLFIRDASALGVIDRQEGSQAAS---GAGD-----      | NKDIFS                  |
| EcabaDIA1R  | 290 | THVDAGMFGIFN-NG----  | HLFIRDASTLGVIDRQEGSQAAA---RAGE-----      | NKDIFS                  |
| DordiDIA1R  | 290 | THVDAAMFGIFS-NG----  | HLFIRDASALGVIDKQEGSQAAP---KAGE-----      | NQDIFS                  |
| MdomeDIA1R  | 289 | TRIDAGTFGIFD-NG----  | HLFIRDASTVGVIDKQRGSLTLD---RQEE-----      | SKDIFS                  |
| OanatDIA1R  | 289 | TRIHAGTFGVFD-NG----  | HLFIRDASSLGVIDRQEGKRPAR---SSPE-----      | PRDIFS                  |
| GgallDIA1R  | 287 | TRVDVGTFGVFS-NG----  | HLFIRDASTLGVIDKEEGSQPID---GQQE-----      | YKDIFS                  |
| BflorDIA1Lb | 383 | VDFSFNFAVNN-YG----   | RLTLIDFDVMLIDREEFVGENK--TEPCD-----       | LKCFKT                  |
| BflorDIA1Lc | 244 | LDVSFQNFVAVDS-RG---- | WVRLIDLDDVMVIDRRTVVVNQEQ--TEMCN-----     | EQCYTD                  |
| AaegyDIA1   | 254 | TDISPDNIVSMSSEEE-I   | KVTFVLDLNNVILDSHSHKRLKP-----             | SK-----QKHVHS           |
| CpipiDIA1   | 256 | TDINPDNIAVQAQPSGS-F  | QVSFIDLNNVILDSQSKRLDRR-----              | SK-----ARNIHS           |
| DyakuDIA1   | 228 | TDFTGDNFAVDEHTK----  | KVYLIDLDSVVLVD-----                      | ASSAT-----GQ-----AEKYEP |
| DerecDIA1   | 229 | TDFTGDNFAVDEDSK----  | RVYLIDLDSVVLVD-----                      | ASSAA-----GQ-----AEKYVP |
| DmelaDIA1   | 231 | TDFTADNLAVDEDTK----  | KVYLIDLDSVVLVD-----                      | ASFAA-----GH-----AEKYEP |
| DsechDIA1   | 233 | TDFTADNLAVDEETK----  | KVYLIDLDSVVLVD-----                      | ASSMA-----GQ-----AEKYEP |
| DpersDIA1   | 232 | TDFTADNLAVDEASQ----  | SVILIDLDSVVLVD-----                      | AAVPL-----GD-----AQKYEP |
| DpseuDIA1   | 232 | TDFTADNLAVDEASQ----  | SVILIDLDSVVLVD-----                      | AAVPL-----GD-----AQKYEP |
| DananDIA1   | 232 | TDFTSDNLTFDEDTR----  | RVLLIDLDSVVMVD-----                      | AASTS-----GQ-----AEKYEP |
| DwillDIA1   | 218 | TDFTADNLAVNEANG----  | TVLLIDMDTVMVLSNDEAESES-----              | QL-----SKKYKP           |
| NvitrDIA1   | 260 | TDISMDNIAVNNEDK----  | AIFVDLENIIVEKPNPEKALVGIESWNE-----        | TYTNAV                  |
| SpurpDIA1L  | 363 | LDFGYENFVMTS-EG----  | QLKVVNLGGVIVDKDQTSTTPDMNPHLNNRTELCNEDCLN |                         |
| BflorDIA1La | 331 | VEVNIENFVSS-DG----   | RLILTDLGNMTIINKHDLDKNSTKKRSSVC-----      | NEACFK                  |
| CinteDIA1   | 303 | HRLTPRDIIVGSD-TG---- | KLRIKNAENVILID-----                      | NNSKN-----DKGLYE        |
| AgambDIA1   | 264 | TDINPDNVVNLKNDNKQVYS | IVDLNVIILDSWAEVFLTKN-----                | THVHS                   |
| consensus   | 421 | d fav                | kv i d e i v d                           |                         |

... Motif 10

Motif 11



|            |     |                  |                |                |               |                 |                  |
|------------|-----|------------------|----------------|----------------|---------------|-----------------|------------------|
| SpurpDIA1  | 328 | CGSRRECIMFSHTDL  | CNHYYSDHNY     | YAVCQGLF       | GKDSPHGD      | -----           | GGLHSIP          |
| NvectDIA1  | 318 | CS-QPDCLSFSPSDMC | SGGSRDHNY      | YAVCQGL        | LAGSSRRQ      | -----           | GLLHNPP          |
| GaculDIA1  | 336 | CD-REACLSFSKESLC | SRVTVDHNY      | YAVCQNLL       | SRyatWRGTT    | -----           | GLLHDPP          |
| OlatiDIA1  | 336 | CD-REACLSFSKDSL  | SRVTVDHNY      | YAVCQNLL       | SRyatWRGTT    | -----           | GLLHDPP          |
| TnigrDIA1  | 336 | CD-REACLSFSKDSL  | SRVTVDHNY      | YAVCQNLL       | SRyatWRGTT    | -----           | GLLHDPP          |
| TrubrDIA1  | 336 | CD-REACLSFSKDSL  | SRVTVDHNY      | YAVCQNLL       | SRyatWRGTT    | -----           | GLLHDPP          |
| DreriDIALb | 336 | CD-KEACLSFSKMDL  | SRVTVDHNY      | YAVCQNLL       | SRyatWRGSS    | -----           | GLLHDPP          |
| DreriDIALa | 336 | CD-KEACLSFSKDIL  | SRVTVDHNY      | YAVCQDLL       | SRFSSWRGST    | -----           | GLLHDPP          |
| BtaurDIA1  | 337 | CD-KEACLSFSKEIL  | CARATVDHNY     | YAVCQNLL       | SRHATWRGTS    | -----           | GLLHDPP          |
| PpygmDIA1  | 337 | CD-KEACLSFSKEIL  | CARATVDHNY     | YAVCQNLL       | SRHATWRGTS    | -----           | GLLHDPP          |
| CfamIDIA1  | 337 | CD-KEACLSFSKEIL  | CARATVDHNY     | YAVCQNLL       | SRHATWRGTS    | -----           | GLLHDPP          |
| PtrogDIA1  | 337 | CD-KEACLSFSKEIL  | CARATVDHNY     | YAVCQNLL       | SRHATWRGTS    | -----           | GLLHDPP          |
| TtrunDIA1  | 337 | CD-KEACLSFSKEIL  | CARATVDHNY     | YAVCQNLL       | SRHATWRGTS    | -----           | GLLHDPP          |
| HsapiDIA1  | 337 | CD-KEACLSFSKEIL  | CARATVDHNY     | YAVCQNLL       | SRHATWRGTS    | -----           | GLLHDPP          |
| MmulaDIA1  | 337 | CD-KEACLSFSKEIL  | CARATVDHNY     | YAVCQNLL       | SRHATWRGTS    | -----           | GLLHDPP          |
| PvampDIA1  | 337 | CD-KEACLSFSKEIL  | CARVTVDHNY     | YAVCQNLL       | FRHATWRGTS    | -----           | GLLHDPP          |
| MdomeDIA1  | 337 | CD-KEACLSFSKEIL  | CSRATVDHNY     | YAVCQNLL       | SRHATWRGTS    | -----           | GLLHDPP          |
| MmuscDIA1  | 337 | CD-KEACLSFSKEIL  | CARVTVDHNY     | YAVCQNLL       | SRHATWRGTS    | -----           | GLLHDPP          |
| RnorvDIA1  | 337 | CD-KEACLSFSKEIL  | CARVTVDHNY     | YAVCQNLL       | SRHATWRGTS    | -----           | GLLHDPP          |
| GgallDIA1  | 336 | CD-KEACLSFSKEIL  | CARVTVDHNY     | YAVCQNLL       | SRHATWRGTS    | -----           | GLLHDPP          |
| XtropDIA1  | 336 | CD-KEACLSFSKEIL  | CSRATVDHNY     | YAVCQNLL       | SRHATWRGTS    | -----           | GLLHDPP          |
| BflorDIA1  | 325 | CPGMSNCLSFVSA    | LCRYLHTDHNY    | YAVCRNML       | SEYASEMGKP    | -----           | GLLHDPP          |
| SsalaDIA1R | 341 | CLGQGTSPCHR-SPP  | CSVVRPTQSLTLL  | CTALLP         | RRLLLTERGAQT  | TRLPMEGEAEAGRLA |                  |
| DreriDIA1R | 321 | CL--SGS          | CVR--PPP       | ETVREAQSF      | ILLCKYILN     | -NLLTSN         | -----DKQSG-LP    |
| RnorvDIA1R | 339 | CL-VSGCQVQ--     | MSSCDTVPEKQ    | NLVLCQQLLP     | -QLLRG        | -----           | KFPSPVQ          |
| MmuscDIA1R | 339 | CL-VSDCQIQ--     | LSSCDTVPEKQ    | SLVLCQQLLP     | -QLLQG        | -----           | KFPSPVQ          |
| MmulaDIA1R | 337 | CL-VSGCQAQ--     | LPSCESVSEKQ    | SLVLCQQLLP     | -RLLQG        | -----           | RFPSPVQ          |
| HsapiDIA1R | 337 | CL-VSGCQAQ--     | LPSCESISEKQ    | SLVLCQQLLP     | -RLLQG        | -----           | RFPSPVQ          |
| BtaurDIA1R | 337 | CL-VSGCQTK--     | LPSCDTIPEKQ    | NLVLCQQLLP     | -LLLQA        | -----           | KFPSPVQ          |
| EcabaDIA1R | 337 | CL-LSDCQAE--     | LPSCDTVPEKQ    | SLVLCQQLLP     | -RLLQG        | -----           | KFPSPVQ          |
| DordiDIA1R | 337 | CL-VSGCQAQL-     | LPSCDNIPDKQ    | SVVLCQQLLP     | -QLLQG        | -----           | KFPSPVQ          |
| MdomeDIA1R | 336 | CL-VLDCQSP--     | FPS            | CSVKEKQSWMAC   | QQLLP-QLLKE   | -----           | KFPQPIQ          |
| OanatDIA1R | 336 | CL-AADCQSD--     | LPS            | CNTVQEHQSLVLC  | RELLP-KLLEG   | -----           | KFPKPVQ          |
| GgallDIA1R | 334 | CL-TVDCQSA--     | FVSCNS         | SIREKQSLVMVC   | QELLP-KLLRG   | -----           | KFLPPVQ          |
| BflorDIALb | 431 | FISQIEAMNSYDSC   | SAMPQYSQMMYAL  | ACVRLLSHL      | PEHLSEP--     | NPMDPKPKHRP     | DSE              |
| BflorDIALc | 292 | FQKKLYS-DEYH-    | CDDIFKYAPMMYAS | ICARLLSNLQKHP  | PERRKWEIREYQE | GQSI            | ELD              |
| AaegyDIA1  | 302 | RIDCDGCFAYIQEDI  | CVHQISDINL     | FAVCQLLEN      | LNNGDSKR      | -----           | GFLHSLG          |
| CpipiDIA1  | 305 | RIPCDGCFAYVQEDL  | CSYQHS         | DINQFAICQLLY   | ENLNQDREG     | -----           | GFLHIQ           |
| DyakuDIA1  | 270 | -LPGEG-FTFDVSAF  | CSGHQLDANIY    | QACLLLRDYL     | LKLNLDN       | -----           |                  |
| DerecDIA1  | 271 | -LPGEG-FTFDVSAF  | CSGHQLDANIY    | QACLLLRDYL     | LKLNLDN       | -----           |                  |
| DmelaDIA1  | 273 | -LTGEG-FTFDVSAF  | CSGHQLDANIY    | QACLLLRDYL     | LKLNLDN       | -----           |                  |
| DsechDIA1  | 275 | -LAGEG-FTFDVSAF  | CSGHQLDANIY    | QACLLLRDYL     | LKLNLDN       | -----           |                  |
| DpersDIA1  | 274 | -LPGDG-FTFDVKS   | FCGGQQLDANVY   | QACLLLKDF      | LRLDLAN       | -----           |                  |
| DpseuDIA1  | 274 | -LPGDG-FTFDVKS   | FCGGQQLDANVY   | QACLLLKDF      | LRLDLAN       | -----           |                  |
| DananDIA1  | 274 | -LPGEG-FTFDVSAF  | CSGRQLDANVY    | QACLLLRDYL     | LKDLDN        | -----           |                  |
| DwillDIA1  | 264 | -FPGEG-FTYDVNAF  | CDNQDL         | DANIYQVCLLRDQL | LPDVKN        | -----           |                  |
| NvitrDIA1  | 310 | DLDCQDCVVFSPNDIC | SHKVS          | DHNFYAVICQHLL  | TQALGAVFHN    | -----           | QGLHDPP          |
| SpurpDIALl | 418 | TFVKQLQTEPDTH    | CREVPRHVEL     | MYMMACHSLL     | SDLMTTKYER    | -----           | FFQPLDTPR        |
| BflorDIALa | 381 | RFTRNLSHRPETS    | CRQAGRYSQLMY   | ARACQRLG       | CGWQTERSGE    | -----           | GRVVLSSSKDAS     |
| CinteDIA1  | 342 | VRYKQEKVDITEENL  | CDHSENDVNY     | YVICRHF        | LGGTWK        | KERKGGK         | -----KYPGGLLDHPK |
| AgambDIA1  | 313 | KIECN            | CFAYVQEDV      | CRYQNSDLNLE    | FATCQLLEN     | LNNGHYAK        | -----GLLHYDR     |
| consensus  | 481 | c                | ac             | c              | dnyCll        |                 | g lh             |

Motif 12

Motif 13

Motif 14 ...

|             |     |               |                |              |            |                 |               |
|-------------|-----|---------------|----------------|--------------|------------|-----------------|---------------|
| SpurpDIA1   | 377 | SDL-----SSYMR | AKVKGQIAE      | CRSPSK--     | RDGRYL     | VVKE            | LKETLM-----   |
| NvectDIA1   | 365 | -----         | VALKASLNQLLQD  | CTAQDM--     | RNTREETAQK | LSELLQ-----     |               |
| GaculDIA1   | 386 | AH-----       | IAKDGQLLTLDE   | CTRPKK--     | RYGRFQA    | AKELREYLT-----  |               |
| OlatiDIA1   | 386 | AH-----       | IAKDGQLEALDE   | CTRPKK--     | RYGRFQA    | AKELREYLT-----  |               |
| TnigrDIA1   | 386 | AH-----       | IAKDGQLEALDE   | CTKPKK--     | RYGRFQA    | AKELREYLT-----  |               |
| TrubrDIA1   | 386 | AH-----       | IAKDGQLEALDE   | CTKPKK--     | RFGRFQA    | AKELREYLT-----  |               |
| DreriDIA1b  | 386 | PH-----       | IAKDGQLEALDE   | EKANPKK--    | RYGRFQA    | AKELRDYLT-----  |               |
| DreriDIA1a  | 386 | PD-----       | VVKDGRLIALLDE  | CTRPQK--     | RYGRFQA    | AKELREFLT-----  |               |
| BtaurDIA1   | 387 | SE-----       | IAKDGRLEALDE   | CANPKK--     | RYGRFQA    | AKELREYLA-----  |               |
| PpygmDIA1   | 387 | SE-----       | IAKDGRLEALDE   | CANPKK--     | RYGRFQA    | AKELREYLA-----  |               |
| CfamiDIA1   | 387 | SE-----       | IAKDGRLEALDE   | CANPKK--     | RYGRFQA    | AKELREYLA-----  |               |
| PtrogDIA1   | 387 | SE-----       | IAKDGRLEALDE   | CANPKK--     | RYGRFQA    | AKELREYLA-----  |               |
| TtrunDIA1   | 387 | SE-----       | IAKDGRLEALDE   | CANPKK--     | RYGRFQA    | AKELREYLA-----  |               |
| HsapiDIA1   | 387 | SE-----       | IAKDGRLEALDE   | CANPKK--     | RYGRFQA    | AKELREYLA-----  |               |
| MmulaDIA1   | 387 | SE-----       | IAKDGRLEALDE   | CANPKK--     | RYGRFQA    | AKELREYLA-----  |               |
| PvampDIA1   | 387 | SE-----       | IAKDGRLEALDE   | CANPKK--     | RYGRFHA    | AKELREYLA-----  |               |
| MdomeDIA1   | 387 | GE-----       | IAKDGRLEALDE   | CAHPKK--     | RFGRFQA    | AKELREYLA-----  |               |
| MmuscdIA1   | 387 | SE-----       | IAKDGRLEALDE   | CTNPKK--     | RYGRFQA    | AKELRGYLA-----  |               |
| RnorvDIA1   | 387 | SE-----       | IAKDGRLEALDE   | CTNPKK--     | RYGRFQA    | AKELRGYLA-----  |               |
| GgallDIA1   | 386 | AD-----       | IAKDGRLEALDE   | CANPKK--     | RYGRFQA    | AKELREYLA-----  |               |
| XtropDIA1   | 386 | AE-----       | IAKDGRLEALDE   | CANPKK--     | RYGRFKA    | SAKELREYLA----- |               |
| BflorDIA1   | 376 | ET-----       | VVRDGTLQRLAE   | CAKPRT--     | LYGRFDA    | AAKELIELLG----- |               |
| SsalaDIA1R  | 400 | RDV-----      | PLLLGVCADPSQP  | DWRIMAA--    | VGSLMDLLK  | PMRPCNP-----    |               |
| DreriDIA1R  | 364 | RAA-----      | VDELLVCADPSQL  | DQTIIKS--    | VQSLKNILK  | TLRPCSP-----    |               |
| RnorvDIA1R  | 382 | QEI-----      | DSALSLSCKDASTN | LEVFGA--     | TSLLKNILR  | SLRTCDP-----    |               |
| MmuscdIA1R  | 382 | KEI-----      | DSALSLSCKDNST  | DLEVLGA--    | TSWLKDILR  | SLRTCDP-----    |               |
| MmulaDIA1R  | 380 | DDI-----      | DSALAQCGDSTRP  | DPEVLGA--    | ASWLKHILR  | PLRTCDS-----    |               |
| HsapiDIA1R  | 380 | DDI-----      | DSILVQCGDSIRP  | DPEVLGA--    | ASQLKDILR  | PLRTCDS-----    |               |
| BtaurDIA1R  | 380 | E EI-----     | DAELTRCADGTRP  | DPEVLGA--    | ASRLKDILR  | PLRTCDP-----    |               |
| EcabaDIA1R  | 380 | E EI-----     | DATLTWCGEDTRP  | DAEVLGA--    | ASRLKDILR  | PLRTCDP-----    |               |
| DordiDIA1R  | 381 | VEI-----      | DSALAQCGQGIRP  | DSEVFGA--    | ASRLKDILR  | PLRTCDP-----    |               |
| MdomeDIA1R  | 379 | E QI-----     | DSALVLCGNSSLS  | DQEVIEA--    | ASRLKAILK  | PLRTCDP-----    |               |
| OanatDIA1R  | 379 | E EI-----     | DALLDRCGDSSLD  | GGQTVIGG--   | ARRLMDILK  | SLRTCDA-----    |               |
| GgallDIA1R  | 377 | E KI-----     | DSFLQHCAEGLAD  | DQVNEA--     | MAKLAQLLK  | PLRSCDS-----    |               |
| BflorDIA1Lb | 489 | RP---         | RLWGPPEQEAKV   | LEELRGC      | VEENV--    | AGGRLEAVGELK    | TFILR-----    |
| BflorDIA1Lc | 350 | E PPVKGFLHNP  | PEIREALEGALT   | QCVHETL--    | PRGRLGAVLR | LQEIILG-----    |               |
| AaegyDIA1   | 351 | T DS-----     | KLEAFRKLHQC    | VYQPPYCEDR   | QEVLRIME   | I IH-----       |               |
| CpipiDIA1   | 354 | N DD-----     | SQPRLSEIRQLL   | HHCVCVPPDC   | DRDQGLLQ   | QVQEI ID-----   |               |
| DyakuDIA1   | 310 | -----         | ERLQLLLEQC     | VACQDDFC     | DMRFQHAYD  | L IKMLD-----    |               |
| DerecdIA1   | 311 | -----         | ERLQLLLEQC     | VACQDDFC     | DMRFQHAYD  | L IKVLD-----    |               |
| DmelaDIA1   | 313 | -----         | EKLQLLLEQC     | VACQDDFC     | DMRFQHAYD  | L IKVLE-----    |               |
| DsechDIA1   | 315 | -----         | EKLQLLLEQC     | VACQDDFC     | DMRFQHAYD  | L IKELE-----    |               |
| DpersDIA1   | 314 | -----         | GRLEMLLEQC     | VRCDDATC     | DMRFQAYD   | L IKLLG-----    |               |
| DpseuDIA1   | 314 | -----         | GRLEMLLEQC     | VRCDDATC     | DMRFQAYD   | L IKLLG-----    |               |
| DananDIA1   | 314 | -----         | ERLQLLLEK      | CVQCDDLC     | DMRFQYAYD  | L IKLLD-----    |               |
| DwillDIA1   | 304 | -----         | HRLKEMLNDC     | VQCEDDKC     | DIRFKYANN  | L IDLLV-----    |               |
| NvitrDIA1   | 361 | D-----        | YILQKHPTLIDL   | LEQCAKPDIG-- | YSRIDIAHKL | IVLLD-----      |               |
| SpurpDIA1L  | 470 | KHHPGMLHDAP   | YEVDSVLSELLY   | ECVFEQG--    | PGRRMH     | SVRVLKRLLT----- |               |
| BflorDIA1La | 436 | CAYGRGLLFG    | PPREAKQELEDL   | TEC          | VEETK--    | AGGRITALKQ      | TRVLLA-----   |
| CinteDIA1   | 396 | EFG-----      | VFSSQMFVLLD    | ICSRGKTAV    | APERRTL    | LSHSIRRLAANQL   | RNVLERRR----- |
| AgambDIA1   | 362 | DAEAFP----    | VLGEASKMLQNL   | LS           | ECVYQPPDC  | QNRSHILKDM      | LHI ID-----   |
| consensus   | 541 | e             |                | l e          |            | l               |               |

... Motif 14

Motif 15

|             |     |                                  |
|-------------|-----|----------------------------------|
| SpurpDIA1   | 416 | ----KLIT-----                    |
| NvectDIA1   | 400 | ----GYL-----                     |
| GaculDIA1   | 423 | ----QLAAASSSATAR-----            |
| OlatiDIA1   | 423 | ----KLAAASSSATS-----             |
| TnigrDIA1   | 423 | ----QLA-----                     |
| TrubrDIA1   | 423 | ----QLAASSSSLV SAR-----          |
| DreriDIA1b  | 423 | ----QLSGSAR-----                 |
| DreriDIA1a  | 423 | ----QLTQTSNADR-----              |
| BtaurDIA1   | 424 | ----QLSNNVR-----                 |
| PpygmDIA1   | 424 | ----QLSNNVR-----                 |
| CfamiDIA1   | 424 | ----QLSNNVR-----                 |
| PtrogDIA1   | 424 | ----QLSNNVR-----                 |
| TtrunDIA1   | 424 | ----QLSNNVR-----                 |
| HsapiDIA1   | 424 | ----QLSNNVR-----                 |
| MmulaDIA1   | 424 | ----QLSNNVR-----                 |
| PvampDIA1   | 424 | ----QLSNNVR-----                 |
| MdomeDIA1   | 424 | ----QLSNNGR-----                 |
| MmuscDIA1   | 424 | ----QLSHNVR-----                 |
| RnorvDIA1   | 424 | ----QLSHNVR-----                 |
| GgallDIA1   | 423 | ----QLSNNVR-----                 |
| XtropDIA1   | 423 | ----QLSNNAR-----                 |
| BflorDIA1   | 413 | ----SFLKDR-----                  |
| SsalaDIA1R  | 439 | ----HYTYRYPECRYNQDY-----         |
| DreriDIA1R  | 403 | ----QYAYRYPECLYSDKF-----         |
| RnorvDIA1R  | 421 | ----RFAYRYPDCKYNDRF-----         |
| MmuscDIA1R  | 421 | ----RFAYRYPDCKYNDRF-----         |
| MmulaDIA1R  | 419 | ----RFAYRYPDCKYNDKF-----         |
| HsapiDIA1R  | 419 | ----RFAYRYPDCKYNDKF-----         |
| BtaurDIA1R  | 419 | ----RFAYRYPDCKYDDKF-----         |
| EcabaDIA1R  | 419 | ----RFAYRYPDCKYNDKF-----         |
| DordiDIA1R  | 420 | ----RFAYRYPDCKYNDRF-----         |
| MdomeDIA1R  | 418 | ----RYAYRYPDCKYSDRY-----         |
| OanatDIA1R  | 418 | ----RFAYRYPDCKYSEKY-----         |
| GgallDIA1R  | 416 | ----RFAYRYPDCKYSDKY-----         |
| BflorDIA1Lb | 533 | ----RNAKGEN-----                 |
| BflorDIA1Lc | 397 | ----TT-----                      |
| AaegyDIA1   | 389 | ----DVLHEVV-----                 |
| CpipiDIA1   | 395 | ----GILVES-----                  |
| DyakuDIA1   | 343 | ----SKN-----                     |
| DerecDIA1   | 344 | ----SKI-----                     |
| DmelaDIA1   | 346 | ----SNN-----                     |
| DsechDIA1   | 348 | ----SKN-----                     |
| DpersDIA1   | 347 | ----ELLGS-----                   |
| DpseuDIA1   | 347 | ----ELLGS-----                   |
| DananDIA1   | 347 | ----S-----                       |
| DwillDIA1   | 337 | ----EINNKIEIL-----               |
| NvitrDIA1   | 399 | ----SVIKNA-----                  |
| SpurpDIA1L  | 517 | ----I IQRGFSYKDAADRTSL-----      |
| BflorDIA1La | 483 | ----A-----                       |
| CinteDIA1   | 446 | ICSPDFKYRYPECELAEDAGINLPSIELQWLH |
| AgambDIA1   | 407 | ----QTIIQS-----                  |
| consensus   | 601 |                                  |
