# Supplementary material for: Characterization of the Deleted in Autism 1 Protein Family: Implications for Studying Cognitive Disorders
Source: PubMed Central journal article supplement (PMC3023760; doi:10.1371/journal.pone.0014547), 2011-01-19
Supplement: pone.0014547.s019.pdf [file pone.0014547.s019.pdf]

**Fig. S9**

|             |   |                                                                |
|-------------|---|----------------------------------------------------------------|
| SpurpDIA1   | 1 | -----                                                          |
| NvectDIA1   | 1 | -----                                                          |
| GaculDIA1   | 1 | -----                                                          |
| OlatiDIA1   | 1 | -----                                                          |
| TnigrDIA1   | 1 | -----                                                          |
| TrubrDIA1   | 1 | -----                                                          |
| DreriDIA1b  | 1 | -----                                                          |
| DreriDIA1a  | 1 | -----                                                          |
| BtaurDIA1   | 1 | -----                                                          |
| PpygmDIA1   | 1 | -----                                                          |
| CfamiDIA1   | 1 | -----                                                          |
| PtrogDIA1   | 1 | -----                                                          |
| TtrunDIA1   | 1 | -----                                                          |
| HsapiDIA1   | 1 | -----                                                          |
| MmulaDIA1   | 1 | -----                                                          |
| PvampDIA1   | 1 | -----                                                          |
| MdomeDIA1   | 1 | -----                                                          |
| MmuscDIA1   | 1 | -----                                                          |
| RnorvDIA1   | 1 | -----                                                          |
| GgallDIA1   | 1 | -----                                                          |
| XtropDIA1   | 1 | -----                                                          |
| BflorDIA1   | 1 | -----                                                          |
| SsalaDIA1R  | 1 | -----                                                          |
| DreriDIA1R  | 1 | -----                                                          |
| RnorvDIA1R  | 1 | -----                                                          |
| MmuscDIA1R  | 1 | -----                                                          |
| MmulaDIA1R  | 1 | -----                                                          |
| HsapiDIA1R  | 1 | -----                                                          |
| BtaurDIA1R  | 1 | -----                                                          |
| EcabaDIA1R  | 1 | -----                                                          |
| DordiDIA1R  | 1 | -----                                                          |
| MdomeDIA1R  | 1 | -----                                                          |
| OanatDIA1R  | 1 | -----                                                          |
| GgallDIA1R  | 1 | -----                                                          |
| BflorDIA1Lb | 1 | MASARRWCRRLLHYSGWTRVLFLLTLMIAVGF IARNYWQVEDDLEARKRISNGGDKKYAQS |
| BflorDIA1Lc | 1 | -----                                                          |
| AaegyDIA1   | 1 | -----                                                          |
| CpipiDIA1   | 1 | -----                                                          |
| DyakuDIA1   | 1 | -----                                                          |
| DerecDIA1   | 1 | -----                                                          |
| DmelaDIA1   | 1 | -----                                                          |
| DsechDIA1   | 1 | -----                                                          |
| DpersDIA1   | 1 | -----                                                          |
| DpseuDIA1   | 1 | -----                                                          |
| DananDIA1   | 1 | -----                                                          |
| DwillDIA1   | 1 | -----                                                          |
| NvitrDIA1   | 1 | -----                                                          |
| SpurpDIA1L  | 1 | -----MGPRIRKKILILGSSILFTIFTVQLTGLNSLRDDDDNNAL                  |
| BflorDIA1La | 1 | -----MPILVESEAGYGGRHGRAMVARRMVRKCCLP                           |
| CinteDIA1   | 1 | -----                                                          |
| AgambDIA1   | 1 | -----                                                          |
| consensus   | 1 | -----                                                          |

|             |    |                                                             |
|-------------|----|-------------------------------------------------------------|
| SpurpDIA1   | 1  | -----MRRYFNQFTNRFCSSTQQIWLVLSSMCL                           |
| NvectDIA1   | 1  | -----MHFGGILRKRRYICRLVLLIVLISFSDLLL                         |
| GaculDIA1   | 1  | -----MLRFLPL-KLGRLYRCLKLLLVVGLFVILL                         |
| OlatiDIA1   | 1  | -----MLRFLPL-KLGRLYRCLKLLLVVGLFVILL                         |
| TnigrDIA1   | 1  | -----MLRFLPL-KLGRLYRCLKLLLVVGLFVILL                         |
| TrubrDIA1   | 1  | -----MLRFLPL-KLGRLYRCLKLLLVVGLFVILL                         |
| DreriDIA1b  | 1  | -----MLRFLPL-KLGRLYRCLKLLFLLGLFVILL                         |
| DreriDIA1a  | 1  | -----MLRILSL-KFGRVYRCGKFLFIVALFVILL                         |
| BtaurDIA1   | 1  | -----MWRLVPP-KLGRLSRSLKLAALGSLLVLMV                         |
| PpygmDIA1   | 1  | -----MWRLVPP-KLGRLSRSLKLAALGSLLVLMV                         |
| CfamiDIA1   | 1  | -----MWRLVPP-KLGRLSRSLKLAALGSLLVLMV                         |
| PtrogDIA1   | 1  | -----MWRLVPP-KLGRLSRSLKLAALGSLLVLMV                         |
| TtrunDIA1   | 1  | -----MWRLVPP-KLGRLSRSLKLAALGSLLVLMV                         |
| HsapiDIA1   | 1  | -----MWRLVPP-KLGRLSRSLKLAALGSLLVLMV                         |
| MmulaDIA1   | 1  | -----MWRLVPP-KLGRLSRSLKLAALGSLLVLMV                         |
| PvampDIA1   | 1  | -----MWRLVPP-KLGRLSRSLKLAALGSLLVLMV                         |
| MdomeDIA1   | 1  | -----MWRLVPP-KLGRLSRSLKLAALGSLLVLMV                         |
| MmuscDIA1   | 1  | -----MWRLVPL-KLGRLSRALKLAALGSLLVLMV                         |
| RnorvDIA1   | 1  | -----MWRLVPL-KLGRLSRALKLAALGSLLVLMV                         |
| GgallDIA1   | 1  | -----MLRLVSL-KLGRLYRYVKLAVLGSAAALV                          |
| XtropDIA1   | 1  | -----MLRLASL-KFGRIFRYAKVLFASLLVVMV                          |
| BflorDIA1   | 1  | -----MRLVRLRQFRFFSGWVRRMCGFFFFVV                            |
| SsalaDIA1R  | 1  | -----MPL--KRCDQRAVGSVRLT--VCVLSWLLCVCWAPS                   |
| DreriDIA1R  | 1  | -----MAG-----IWSGVWILCFILVFG                                |
| RnorvDIA1R  | 1  | -----MELGRPGAAATAFRQRWPAWMLLWVSTLSCSFSLPA                   |
| MmuscDIA1R  | 1  | -----MESQWRGAAATAFHQHWLARLLWVSTLSCSFSLPA                    |
| MmulaDIA1R  | 1  | -----MEP-QLGPEAAALRPGWLA-LLLVVVSALSCSFSLPA                  |
| HsapiDIA1R  | 1  | -----MEP-QLGPEAAALRPGWLA-LLLVVVSALSCSFSLPA                  |
| BtaurDIA1R  | 1  | -----MEP-RLGPKAAALHLGWPF-LLLVVSGLSYSVSSPA                   |
| EcabaDIA1R  | 1  | -----MEP-WLGPEAAALRPGWPA-LLLVVVSALRCSVSSPA                  |
| DordiDIA1R  | 1  | -----MDP-QLGPEAAALHPGWQV-LLLVVVSVLSCFSSPA                   |
| MdomeDIA1R  | 1  | -----MES-VIHGPLASPCLGWLT--LLQLVTLSCISSTES                   |
| OanatDIA1R  | 1  | -----MGL-RLGCRLFSAALSWMT--LLQFLTRGHGPVADA                   |
| GgallDIA1R  | 1  | -----MGR--WICCLCSRVDWLV--LLLVVLARSSNPSAAA                   |
| BflorDIA1Lb | 61 | IQELLAQGIDEKRMREALRQKAEVHRIVKERGEALAKEAQAKAKANVVRINLHKPEL   |
| BflorDIA1Lc | 1  | -----                                                       |
| AaegyDIA1   | 1  | -----MSQHRIITKLHLVALFLWIVVMKYQ                              |
| CpipiDIA1   | 1  | -----MSSGFQRIIVNLHILALIFCVIFEFQ                             |
| DyakuDIA1   | 1  | -----MHLSPGQLKVVVILALLQELQ                                  |
| DerecDIA1   | 1  | -----MHLSPGQLKVVVILALLQELQ                                  |
| DmelaDIA1   | 1  | -----MHLSHGQLKVVVILALLQELQ                                  |
| DsechDIA1   | 1  | -----MHLSYGQLKVVVILALLQELQ                                  |
| DpersDIA1   | 1  | -----MHLSPGHLRIVLILALLQDLQ                                  |
| DpseuDIA1   | 1  | -----MHLSPGHLRIVLILALLQDLQ                                  |
| DananDIA1   | 1  | -----MHLISGQLRIVLILALLQDLQ                                  |
| DwillDIA1   | 1  | -----MHLLYGQLKVVVILALLQELD                                  |
| NvitrDIA1   | 1  | -----MLVTKASVSSFLIALLLILIL                                  |
| SpurpDIA1L  | 40 | PSTNGKFRTFVPSKGRKRNLLHAGKQKKEELGFDSKDTRRTLQDIRTADEIKGHPRIQA |
| BflorDIA1La | 32 | LLVLSATLAVLYIYLVQVQGSPWVSLGQSQAGNKQKKDEYIIVWRGEEQKVEVQKQEEK |
| CinteDIA1   | 1  | -----MLLKMKRYLTVWENGKYIVFIFILITLLEVLL                       |
| AgambDIA1   | 1  | -----MQSSRLPYFVTLFIAVVVLYL                                  |
| consensus   | 61 | 1 i 1k1 1 1l m1l                                            |

Signal  
peptide

|             |     |                |             |           |              |                  |          |            |         |         |       |        |        |       |    |
|-------------|-----|----------------|-------------|-----------|--------------|------------------|----------|------------|---------|---------|-------|--------|--------|-------|----|
| SpurpDIA1   | 32  | FVYYQ----      | LYLHFTANHL  | ENEYF     | TEAT-----    | KCPACFGT         | SLCKRFSR | GD         |         |         |       |        |        |       |    |
| NvectDIA1   | 32  | WLSYQDGRAIKWDF | SSQHKLTFQEI | IGLN----- | KCPACFGT     | NLSICHKLL        | GGG      |            |         |         |       |        |        |       |    |
| GaculDIA1   | 30  | MNTHS----      | LFASFQKNE   | LTD       | RRFINLN----- | KCPACFGT         | SWCRKFM  | NGQ        |         |         |       |        |        |       |    |
| OlatiDIA1   | 30  | MNTHN----      | LFASFQKNE   | LTD       | RRFINLN----- | KCPACFGT         | SWCRKFM  | NGQ        |         |         |       |        |        |       |    |
| TnigrDIA1   | 30  | MNTHN----      | LFASFQKNE   | LTD       | RRFINLN----- | KCPACFGT         | SWCRKFM  | NGQ        |         |         |       |        |        |       |    |
| TrubrDIA1   | 30  | MNTHN----      | LFASFQKNE   | LTD       | RRFINLN----- | KCPACFGT         | SWCRKFM  | NGQ        |         |         |       |        |        |       |    |
| DreriDIA1b  | 30  | MNTHN----      | LFASFQKNE   | LTD       | RRFINLN----- | KCPACFGT         | SWCRKFM  | NGQ        |         |         |       |        |        |       |    |
| DreriDIA1a  | 30  | MNTHN----      | LFASFQ      | RNE       | LTD          | RRFIGLN-----     | KCPACFGT | SWCRKFM    | NGQ     |         |       |        |        |       |    |
| BtaurDIA1   | 30  | LHSPS----      | LLASWQ      | RNE       | LADR         | RRFLQLN-----     | KCPACFGT | SWCRRFL    | NGQ     |         |       |        |        |       |    |
| PpygmDIA1   | 30  | LHSPS----      | LLASWQ      | RNE       | LADR         | RRFLQLN-----     | KCPACFGT | SWCRRFL    | NGQ     |         |       |        |        |       |    |
| CfamiDIA1   | 30  | LHSPS----      | LLASWQ      | RNE       | LADR         | RRFLQLN-----     | KCPACFGT | SWCRRFL    | NGQ     |         |       |        |        |       |    |
| PtrogDIA1   | 30  | LHSPS----      | LLASWQ      | RNE       | LADR         | RRFLQLN-----     | KCPACFGT | SWCRRFL    | NGQ     |         |       |        |        |       |    |
| TtrunDIA1   | 30  | LHSPS----      | LLASWQ      | RNE       | LADR         | RRFLQLN-----     | KCPACFGT | SWCRRFL    | NGQ     |         |       |        |        |       |    |
| HsapiDIA1   | 30  | LHSPS----      | LLASWQ      | RNE       | LADR         | RRFLQLN-----     | KCPACFGT | SWCRRFL    | NGQ     |         |       |        |        |       |    |
| MmulaDIA1   | 30  | LHSPS----      | LLASWQ      | RNE       | LADR         | RRFLQLN-----     | KCPACFGT | SWCRRFL    | NGQ     |         |       |        |        |       |    |
| PvampDIA1   | 30  | LHSPS----      | LLASWQ      | RNE       | LADR         | RRFLQLN-----     | KCPACFGT | SWCRRFL    | NGQ     |         |       |        |        |       |    |
| MdomeDIA1   | 30  | LHSPS----      | LLASWQ      | RNE       | LADR         | RRFLQLN-----     | KCPACFGT | SWCRRFL    | NGQ     |         |       |        |        |       |    |
| MmuscDIA1   | 30  | LHSPS----      | LLASWQ      | RNE       | LADR         | RRFLQLN-----     | KCPACFGT | SWCRRFL    | NGQ     |         |       |        |        |       |    |
| RnorvDIA1   | 30  | LHSPS----      | LLASWQ      | RNE       | LADR         | RRFLQLN-----     | KCPACFGT | SWCRRFL    | NGQ     |         |       |        |        |       |    |
| GgallDIA1   | 30  | LNTHS----      | LLASQ       | RNE       | LA           | ERFLQLN-----     | KCPACFGT | SWCRKFL    | NGQ     |         |       |        |        |       |    |
| XtropDIA1   | 30  | LNTHS----      | LLSSFQ      | RNE       | LTD          | RRFLSLN-----     | KCPACFGT | SWCRKFM    | NGQ     |         |       |        |        |       |    |
| BflorDIA1   | 30  | FFYCF----      | VFQPF       | SYN       | QLT          | DTTFLGED-----    | KCPACFGT | DLCEEF     | ENGK    |         |       |        |        |       |    |
| SsalaDIA1R  | 33  | VVEPAGT--      | PPAPQ       | QKAL      | ILQ          | RAFLGLD-----     | KCNACVGT | SICKKLL    | KDQ     |         |       |        |        |       |    |
| DreriDIA1R  | 19  | TADPS----      | PAPQD       | KSH       | DFR          | KIFLGLD-----     | KCNACVGT | SICKKFF    | KDE     |         |       |        |        |       |    |
| RnorvDIA1R  | 37  | SLPPSL----     | VPRVR       | SSYT      | LGK          | TFLGLD-----      | KCNACVGT | SICKKFF    | KEE     |         |       |        |        |       |    |
| MmuscDIA1R  | 37  | SLPPSL----     | VPRVR       | SSYT      | MGK          | TFLGLD-----      | KCNACVGT | SICKKFF    | KEE     |         |       |        |        |       |    |
| MmulaDIA1R  | 35  | SSPSSL----     | VSQVR       | TSYN      | FGRT         | FGLD-----        | KCNACVGT | SICKKFF    | KEE     |         |       |        |        |       |    |
| HsapiDIA1R  | 35  | SSLSSL----     | VPQVR       | TSYN      | FGRT         | FGLD-----        | KCNACVGT | SICKKFF    | KEE     |         |       |        |        |       |    |
| BtaurDIA1R  | 35  | SPSPSP----     | VSRVR       | TSYN      | LGK          | TFLGLD-----      | KCNACVGT | SICKKFF    | KEE     |         |       |        |        |       |    |
| EcabaDIA1R  | 35  | SPSPSL----     | VPRVR       | TSYN      | FGRT         | FGLD-----        | KCNACVGT | SICKKFF    | KEE     |         |       |        |        |       |    |
| DordiDIA1R  | 35  | SPPPSL----     | VSRVR       | TSYN      | LGRT         | FGLD-----        | KCNACVGT | SICKKFF    | KEE     |         |       |        |        |       |    |
| MdomeDIA1R  | 34  | LTAPSS----     | VPRVK       | SSYN      | FGRT         | FGLD-----        | KCNACVGT | SICKKFF    | KEE     |         |       |        |        |       |    |
| OanatDIA1R  | 34  | SPAPSL----     | VPRVK       | PSYS      | FGRT         | FGLD-----        | KCNACVGT | SICKKFF    | KEE     |         |       |        |        |       |    |
| GgallDIA1R  | 33  | TASPS----      | APHVR       | PSYS      | FGRT         | FGLD-----        | KCNACVGT | SICKKFF    | KEE     |         |       |        |        |       |    |
| BflorDIA1Lb | 121 | NPENQHSWKA     | IEKMAAH     | DEI       | EDHKK        | QPEQYMTFKRLMDAKK | KCPACVGS | LCEQAE     | VG-     |         |       |        |        |       |    |
| BflorDIA1Lc | 1   | -----          | MVIAD       | GDND      | IDI          | SWAEP            | -----    | KCPACFGD   | KCELLRR | GH      |       |        |        |       |    |
| AaegyDIA1   | 25  | PEERA-----     | SSLK        | SLV       | QQC          | QYDTTI-----      | LCPCCF   | FRP-VN     | C       | SFFENLK |       |        |        |       |    |
| CpipiDIA1   | 27  | PKEPE-----     | SLTELL      | VNQ       | CEY          | ETQH-----        | LCPEC    | CFV        | SPTVNC  | GHLANFV |       |        |        |       |    |
| DyakuDIA1   | 22  | VKPQ-----      | -----       | REVF      | QEL          | FEKDLR-----      | LCPNCF   | FGORE      | LCGEI   | FQKI    |       |        |        |       |    |
| DerecDIA1   | 22  | VKPQ-----      | -----       | REVF      | QEL          | FEKDLR-----      | LCPD     | CFV        | QSE     | LCVGI   | FQKI  |        |        |       |    |
| DmelaDIA1   | 22  | VKPQ-----      | -----       | REVF      | QEL          | FEKDLR-----      | LCPD     | CFV        | QSE     | PCGEI   | FQKI  |        |        |       |    |
| DsechDIA1   | 22  | VKTQ-----      | -----       | REVF      | QEL          | FEKDLR-----      | LCPD     | CFV        | QKE     | QCGEI   | FQKI  |        |        |       |    |
| DpersDIA1   | 22  | VKPQ-----      | -----       | KDIF      | RAH          | LERDLQ-----      | LCPAC    | FAG        | QRW     | QCEEI   | FEAI  |        |        |       |    |
| DpseuDIA1   | 22  | VKPQ-----      | -----       | KDIF      | RAH          | LERDLQ-----      | LCPAC    | FAG        | QRW     | QCEEI   | FEAI  |        |        |       |    |
| DananDIA1   | 22  | VKPQ-----      | -----       | KDIF      | QEH          | FESDLR-----      | LCPAC    | FSA        | QRE     | QCEEV   | FRAI  |        |        |       |    |
| DwillDIA1   | 22  | VRTQ-----      | -----       | KDIF      | RKHF         | NMDLL-----       | ECPC     | CF         | LG      | QRE     | QCEK  | FDTI   |        |       |    |
| NvitrDIA1   | 21  | GIYI-----      | -----       | NRFNL     | KVA          | EITER-----       | YKCPAC   | FGD        | -----   | SMC     | QVIDS | NE     |        |       |    |
| SpurpDIA1L  | 100 | GDETALTQD      | GVQGMKNAT   | VVMT      | TR           | LQFEN--          | LFPSL    | LEEER      | CPL     | CGT     | ----- | TNCDQ  | IYAGN  |       |    |
| BflorDIA1La | 92  | KHPAEEP-KEK    | PRQDK       | SAV       | TER          | KPKG             | VPR      | SLLRN----  | APCPAC  | LG      | ----- | NLCEEF | EDGM   |       |    |
| CinteDIA1   | 32  | EMYNHRSQ       | GSTRVM      | LEAK      | L            | SDK              | WS       | SATSP----- | TCGNF   | S       | CFGT  | -----  | SLCKNR | NRNVG |    |
| AgambDIA1   | 22  | PNEKS-----     | TSKR        | PL        | EN           | VCDY             | DRN----- | ILCP       | EC      | VSS     | ----- | LEC    | NK     | FDDLF |    |
| consensus   | 121 | m s            |             | k         | l            | dr               | fl       | l          |         | kcpa    | Cfgt  |        | s      | Ckrf  | ng |

Motif 1

Motif 2

|             |     |                  |       |        |               |              |                   |                        |
|-------------|-----|------------------|-------|--------|---------------|--------------|-------------------|------------------------|
| SpurpDIA1   | 74  | YRFHSYSSIR       | ----- | LFDYVN | VKNVYFATYLD   | ----         | QKP               | VVMKRLGHNSEHNQFDK      |
| NvectDIA1   | 80  | VTVKSN           | ---T  | -----  | PWSEER        | IKGVSYGLWGA  | ----              | VKQRVVLKTLGTSSELTAFDN  |
| GaculDIA1   | 72  | VSFETWGRLR       | ----- | FLDVFN | VKNVYFAOYGE   | PREGTRR      | VVLKRLG           | SNQELAEIDQ             |
| OlatiDIA1   | 72  | VSFETWGRLR       | ----- | FLDVFN | VKNVYFAOYGE   | PREGTRR      | VVLKRLG           | SNQELAEIDQ             |
| TnigrDIA1   | 72  | VSFETWGRLR       | ----- | FLDVFN | VKNVYFAOYGE   | PREGTRR      | VVLKRLG           | SNQELADIDQ             |
| TrubrDIA1   | 72  | VSFETWGRLR       | ----- | FLDVFN | VKNVYFAOYGE   | PREGTRR      | VVLKRLG           | SNQELADIDQ             |
| DreriDIA1b  | 72  | ISFETWGRLR       | ----- | FLDVFN | VKNVYFAOYGE   | PREGTRR      | VVLKRLG           | SNQELADIDQ             |
| DreriDIA1a  | 72  | VTFEMWGRLR       | ----- | FLDFFN | VKNVYFAOYGE   | PREGTRR      | VVLKRLG           | SNQELAEIDQ             |
| BtaurDIA1   | 72  | VVFEAWGRLR       | ----- | LLDFFN | VKNVYFAOYGE   | PREGTRR      | VVLKRLG           | SORELAQLDQ             |
| PpygmDIA1   | 72  | VVFEAWGRLR       | ----- | LLDFFN | VKNVYFAOYGE   | PREGTRR      | VVLKRLG           | SORELAQLDQ             |
| CfamiDIA1   | 72  | VVFEAWGRLR       | ----- | LLDFFN | VKNVYFAOYGE   | PREGTRR      | VVLKRLG           | SORELAQLDQ             |
| PtrogDIA1   | 72  | VVFEAWGRLR       | ----- | LLDFFN | VKNVYFAOYGE   | PREGTRR      | VVLKRLG           | SORELAQLDQ             |
| TtrunDIA1   | 72  | VVFEAWGRLR       | ----- | LLDFFN | VKNVYFAOYGE   | PREGTRR      | VVLKRLG           | SORELAQLDQ             |
| HsapiDIA1   | 72  | VVFEAWGRLR       | ----- | LLDFFN | VKNVYFAOYGE   | PREGTRR      | VVLKRLG           | SORELAQLDQ             |
| MmulaDIA1   | 72  | VVFEAWGRLR       | ----- | LLDFFN | VKNVYFAOYGE   | PREGTRR      | VVLKRLG           | SORELAQLDQ             |
| PvampDIA1   | 72  | VVFEAWGRLR       | ----- | LLDFFN | VKNVYFAOYGE   | PREGTRR      | VVLKRLG           | SORELAQLDQ             |
| MdomeDIA1   | 72  | VAFEAWGRLR       | ----- | LLDFFN | VKNVYFAOYGE   | PREGTRR      | VVLKRLG           | SORELAQLDQ             |
| MmuscdIA1   | 72  | VGFEAWGRLR       | ----- | LLDFFN | VKNVYFAOYGE   | PREGTRR      | VVLKRLG           | SORELAQLDQ             |
| RnorvDIA1   | 72  | VGFEAWGRLR       | ----- | LLDFFN | VKNVYFAOYGE   | PREGTRR      | VVLKRLG           | SORELAQLDQ             |
| GgallDIA1   | 72  | LRLESWGRLR       | ----- | LDFFN  | VKNVYFAOYGE   | PREGTRR      | VVLKRLG           | SAQELADIDA             |
| XtropDIA1   | 72  | LSFEGWGRLR       | ----- | LDFFN  | VKNVYFAOYGE   | PREGTRR      | VVLKRLG           | SNHELSELDQ             |
| BflorDIA1   | 72  | ILFKYSSRLR       | ----- | LDFFN  | VKNVYFAOYGE   | PREGTRR      | VVLKRLG           | HNSEFDQLDR             |
| SsalaDIA1R  | 77  | IRFDWWMSPD       | ----- | TTLPLA | EKQSEPGNLT    | DDSLWRP      | VVLSFL            | SSPCLHSSSDR            |
| DreriDIA1R  | 60  | IRFERRLTAQ       | ----- | SNLSSA | DVRSYEGNYTD   | STAGWRP      | VVVSRL            | MSPHLHQLSDN            |
| RnorvDIA1R  | 79  | IRLDNSLVSH       | ----- | LGLPSQ | DLLSYAANYSD   | DDSKTWRP     | VEISRL            | VSKYQSEISDK            |
| MmuscdIA1R  | 79  | IRFDNSLASH       | ----- | LGLPPQ | DLHSYAANYSD   | DDSKTWRP     | VEISQL            | VSRYPQIEISDR           |
| MmulaDIA1R  | 77  | IRSDNWLASH       | ----- | LGLPPD | FLLSYFANYSD   | DDSKIWRP     | VEIFRL            | VSNYQNEISDR            |
| HsapiDIA1R  | 77  | IRSDNWLASH       | ----- | LGLPPD | SLLSYFANYSD   | DDSKIWRP     | VEIFRL            | VSKYQNEISDR            |
| BtaurDIA1R  | 77  | IRFDNGLALH       | ----- | LGPDP  | DLPSYFANYSD   | DDFKTWRP     | VEISRL            | VSKQQNKISDG            |
| EcabaDIA1R  | 77  | IRFDNRLASH       | ----- | LGLPSG | YLPSSYANYSD   | DDSKTWRP     | VEVSR             | VLSKQNEISDR            |
| DordiDIA1R  | 77  | IRFDNSLASH       | ----- | LELASD | YLPSSYANYSD   | DDSKTWRP     | VEIFRL            | VSKQNEISDR             |
| MdomeDIA1R  | 76  | IRFDNWLASH       | ----- | LKLPPD | YFSTYFANYSD   | DDTKSWRP     | VEISRL            | VSKYQHELSDR            |
| OanatDIA1R  | 76  | IRFDNWPASH       | ----- | LKPPPD | HFPGYSANYTD   | DDSKSWRL     | VEISRL            | IGKQDQNELSDQ           |
| GgallDIA1R  | 74  | IRFDTWLSSH       | ----- | LKLPPS | YLLSYLGNYTDD  | AQSWRM       | VDITRL            | ITKYQHADRADQ           |
| BflorDIA1Lb | 178 | LITMDVADKT       | ----- | LEHKG  | ---VYFGHFRNT  | -----        | E---              | VVAKRLVGGKDGWTRFDE     |
| BflorDIA1Lc | 36  | FVKVDSESDR       | ----- | YMKKGI | VSTGRICGV     | -----        | K---              | VVAKSMNEAGAWQRYER      |
| AaegyDIA1   | 65  | SIDS             | ---NE | -----  | LFEELL        | THFNQHC      | VRYGTL            | SGSEQRVVIKLN           |
| CpipiDIA1   | 68  | TIDS             | ---SN | -----  | PWNQLT        | CRYNPHCVSYG  | LLGSGQ            | KVVIKTLNKNRAVEALRD     |
| DyakuDIA1   | 59  | AEPSDW           | --SK  | -----  | LLKAIS        | LLVDRRVIY    | FLRFK             | QDQ-----VVAKRKIIDAQNQ  |
| DerecDIA1   | 59  | AEPSDW           | --SK  | -----  | LLKAIS        | LLVDRRAIY    | FLRLK             | DQAQ-----VVAKRKIIDARNH |
| DmelaDIA1   | 59  | AEPSDW           | --SR  | -----  | LVKAIS        | LLVDRRAIY    | FLRLK             | DRDQEV-Q-LVAKRKIIDAQSN |
| DsechDIA1   | 59  | AEPSDW           | --SR  | -----  | LVKAIS        | LLVDRRAIY    | FLRLK             | DQDQAV-Q-LVAKRKIINAHSY |
| DpersDIA1   | 59  | AEPSDW           | --SK  | -----  | LLKGIA        | LLIDREIY     | FLQLNER           | HQAA-Q-LVAKRDAIGGHSY   |
| DpseuDIA1   | 59  | AEPSDW           | --SK  | -----  | LLKGIA        | LLIDREIY     | FLQLNER           | HQAA-Q-LVAKRDAIGGHSY   |
| DananDIA1   | 59  | REPSDL           | --SK  | -----  | LWKAVT        | LLFDRREI     | FWLEIG            | PSQEKSSQ-LLAKRKSIVASHQ |
| DwillDIA1   | 59  | EPAKL            | --DR  | -----  | LWKDLT        | LLVDPREI     | WLELNEN           | REN-VK-CLAKRKMTRKISK   |
| NvitrDIA1   | 57  | ISFEYTDYFS       | ----- | IFNNL  | FSVKNVYCKYKD  | -----        | KKVIM             | KLAQSEIKTFDE           |
| SpurpDIA1L  | 156 | ISFHVG           | ---S  | -----  | VNLSEP        | ---HAIRGTWGD | -----             | RRIVGKRLVSRVFERLEK     |
| BflorDIA1La | 144 | IDLG             | ----- | -----  | SEVTSWKVKA    | YTC          | TWD-----          | KVEVMVTQCASEERLERFEE   |
| CinteDIA1   | 81  | LSEDPVTLRSGWLSIY | YGE   | LVDLHR | VKLNVTYKLPSTL | PCNGETCS     | VQIETS            | VLSGNNVNK              |
| AgambDIA1   | 62  | TLODDN           | ----- | VFNI   | IIN-NIFNSHT   | TRIGTIVQEN   | KLAVMKHL          | NRDNTIEKLLQ            |
| consensus   | 181 | v f e w r        |       | l l    | v v k         | y a q y d    | r v v m k r l g s | l i d n                |

### Motif 3



SpurpDIA1 170 RRLDDRIVWDTFGEERQFDKS-----LARDHKLMLATTTIAFNPEPLVLLQAF-----NRKGWP  
 NvectDIA1 167 TRFLEKIESVYGCQETPGQ-----LSLVEITHLITGLHLNPEPLVLLQIFR-----QEGWGP  
 GaculDIA1 172 QRLDDRIVRRYAEKDSGSFLLKNLKDTERMQLLMTLAFNPEPLVLLQSF-----SDEGWGP  
 OlatiDIA1 172 QRLDDRIVRRYAEKDSGSFLLKNLKDTERMQLLMTLAFNPEPLVLLQSF-----SDEGWGP  
 TnigrDIA1 172 QRLDDRIVRRYAEKDSGSFLLKNLKDTERMQLLMTLAFNPEPLVLLQSF-----SDEGWGP  
 TrubrDIA1 172 QRLDDRIVRRYAEKDSGSFLLKNLKDTERMQLLMTLAFNPEPLVLLQSF-----SDEGWGP  
 DreriDIA1b 172 QRLDDRIVRRYAEKDSGSFLLKNLKDTERMQLLMTLAFNPEPLVLLQSF-----SDEGWGP  
 DreriDIA1a 172 QRLDDRIVRRYAEKDSGSFLLKNLKDTERMQLLMTLAFNPEPLVLLQSF-----SDEGWGP  
 BtaurDIA1 173 QRLDRLVRRYAEKDSGSFLLRNLKDSERMQLLLTLAFNPEPLVLLQSF-----SDEGWGP  
 PpygmDIA1 173 QRLDRLVRRYAEKDSGSFLLRNLKDSERMQLLLTLAFNPEPLVLLQSF-----SDEGWGP  
 CfamiDIA1 173 QRLDRLVRRYAEKDSGSFLLRNLKDSERMQLLLTLAFNPEPLVLLQSF-----SDEGWGP  
 PtrogDIA1 173 QRLDRLVRRYAEKDSGSFLLRNLKDSERMQLLLTLAFNPEPLVLLQSF-----SDEGWGP  
 TtrunDIA1 173 QRLDRLVRRYAEKDSGSFLLRNLKDSERMQLLLTLAFNPEPLVLLQSF-----SDEGWGP  
 HsapiDIA1 173 QRLDRLVRRYAEKDSGSFLLRNLKDSERMQLLLTLAFNPEPLVLLQSF-----SDEGWGP  
 MmulaDIA1 173 QRLDRLVRRYAEKDSGSFLLRNLKDSERMQLLLTLAFNPEPLVLLQSF-----SDEGWGP  
 PvampDIA1 173 QRLDRLVRRYAEKDSGSFLLRNLKDSERMQLLLTLAFNPEPLVLLQSF-----SDEGWGP  
 MdomeDIA1 173 QRLDRLVRRYAEKDSGSFLLRNLKDSERMQLLLTLAFNPEPLVLLQSF-----SDEGWGP  
 MmuscdIA1 173 QRLDRLVRRYAEKDSGSFLLRNLKDSERMQLLLTLAFNPEPLVLLQSF-----SDEGWGP  
 RnorvDIA1 173 QRLDRLVRRYAEKDSGSFLLRNLKDSERMQLLLTLAFNPEPLVLLQSF-----SDEGWGP  
 GgallDIA1 172 QRLDRLVRRYAEKDSGSFLLRNLKDSERMQLLLTLAFNPEPLVLLQSF-----SDEGWGP  
 XtropDIA1 172 QRLDRLVRRYAEKDSGSFLLRNLKDSERMQLLLTLAFNPEPLVLLQSF-----SDEGWGP  
 BflorDIA1 165 QRLIDRVLKFAEHLGKET---EELSYQEKLHFLSTLKFNPEPLVLLQIFP-----ITEGWGP  
 SsalaDIA1R 178 QRLDDRIVRRYAEVVDVGSVQMKHFSEKDKLRLLYTLAVNQOPLIILQMF-----GTEGWGP  
 DreriDIA1R 161 QRLDDRIVRRYAEVVDVGSVQMKHFNEKDKLRLLYTLAVNQOPLIILQMF-----GTEGWGP  
 RnorvDIA1R 180 QRLDDRIVRRYAEVVDAGSIFMDHFTDRDKLRLLYTLAVNAHPILLOIFP-----GAEGWGP  
 MmuscdIA1R 180 QRLDDRIVRRYAEVVDAGSIFMDHFTAGDKLRLLYTLAVNAHPILLOIFP-----GAEGWGP  
 MmulaDIA1R 178 QRLDDRIVRRYAEVADAGSIFMDHFTDRDKLRLLYTLAVNSHPILLOIFP-----GAEGWGP  
 HsapiDIA1R 178 QRLDDRIVRRYAEVADAGSIFMDHFTDRDKLRLLYTLAVNSHPILLOIFP-----GAEGWGP  
 BtaurDIA1R 178 QRLDDRIVRRYAEVADAGSIFMDHFTDRDKLRLLYTLAVNTHPVLLQIFP-----GAEGWGP  
 EcabaDIA1R 178 QRLDDRIVRRYAEVADAGSIFMDHFTDRDKLRLLYTLAVNAHPILLOIFP-----GAEGWGP  
 DordiDIA1R 178 QRLDDRIVRRYAEVADAGSIFMDHFTDRDKLRLLYTLAVNAHPILLOIFP-----GAEGWGP  
 MdomeDIA1R 177 QRLDDRIVRRYAEVADAGSVFMDHFTDRDKLRLLYTLAVNAHPILLOIFP-----GAEGWGP  
 OanatDIA1R 177 QRLDDRIVRRYAEVADAGSVYMDHFTDRDKLRLLYTLAVNAHPVLLQVFP-----GAEGWGP  
 GgallDIA1R 175 QRLDDRIVRRYAEVADAGSIYMDHFTDRDKLRLLYTLAVNSHPILLOIFP-----DVEGWGP  
 BflorDIA1Lb 274 DRLIELIKTAYDENVNGKLSK-----TERAYMITALLLNPEAALLKHETS--RAEYWP  
 BflorDIA1Lc 132 DRFLEDVRLYVDEGGTDMTKE---GDTGRAFLSTSLLLNEEAVLLRYETT--KSTTPWP  
 AaegyDIA1 155 MDEE--ALKRFLFETDEN-----DINKILLMRINAQPLLLKLLQ-----ERNFPP  
 CpipiDIA1 157 KDEK--ALNRLNEVEGT-----ELLQILLKVNVOPLLELFD-----GRGFPP  
 DyakuDIA1 128 PSRKP-RFVSYLQORGH-----SASVWFYMMHYVSPLLMQELY-----LQGFPP  
 DerecdIA1 128 PSRKP-RFVSYLQORGH-----SASVWFYMMHYVSPLLMQELH-----LQGFPP  
 DmelaDIA1 131 LAREP-RFVSYLQORGH-----AASVWFYMMHYVSPLLMQELH-----LQGFPP  
 DsechDIA1 131 LAREP-RFVSYLQORGHVY-----GSTSVWFYMMHYVSPLLMQELH-----LQGFPP  
 DpersDIA1 132 GFRTF-RFVSYLQORGE-----AATIWYMMHSITPLLMQELF-----LRGFPP  
 DpseuDIA1 132 GFRTF-RFVSYLQORGE-----AATIWYMMHSITPLLMQELF-----LRGFPP  
 DananDIA1 132 AQKSS-PFINYLNRQGYD-----SSSIYFYMLHNI SPLLMQELQ-----NLDFPP  
 DwillDIA1 121 STR---FLAYLERGYL-----PATIGYYIHHSISPLLMQELW-----IMDFPP  
 NvitrDIA1 154 TTKLEKLFVNVKFQSHAEN-----EDYFKYLWSTIKINPEPLVLLQILP-----AKEGWGP  
 SpurpDIA1L 253 PDFFEELKQLYRVSRWGTG-----IASTMAILATTMALNPEPALIKFERN--IPSLRPY  
 BflorDIA1La 222 EVFHPNTTSSLQATTCMS-----KPFLLKLLQKTFDDNGNKRNRLEQA--IPRKKLP  
 CinteDIA1 191 TRIADRIVRRYANKQGGVLLR--DLSYTEKRLIFTCKMSPGSVVQSMFP-----PYEGWLP  
 AgambDIA1 157 TNNRQ-SLQRLSLFDSTDN-----EILWNLAVRTNVEPLLLKLLTVNYHDEPPLY  
 consensus 301 qrlldrivrryae kd gs 1 d ekl ll tla npeplvlq fp egwp

... Motif 5

Motif 6

Motif 7 ...

|             |     |                                                                  |
|-------------|-----|------------------------------------------------------------------|
| SpurpDIA1   | 221 | FPAYMGACGRFTVQEYSG--HLSYFYKFK--FGVRAALAVQALKIABOLSENRFDEFALYL    |
| NvectDIA1   | 217 | FPRFYGVCGRIMVVEDSG--PPISSFLEES--WDVRAQIAVNLIITLAHQSSALDDWALYI    |
| GaculDIA1   | 228 | FAKYLGACGRMVAVNYVG--EELWSFYNAP--WEKRVDLARQLMDIAEQLTNNDFDFALYL    |
| OlatiDIA1   | 228 | FAKYLGACGRMVAVNYVG--EELWNFYNAP--WEKRVDLARQLMDIAEQLTNNDFDFALYL    |
| TnigrDIA1   | 228 | FAKYLGACGRMVAVNYVG--EELWSFYNAP--WEKRVDLARQLMDIAEQLTNNDFDFALYL    |
| TrubrDIA1   | 228 | FAKYLGACGRMVAVNYVG--EELWSFYNAP--WEKRVDLARQLMDIAEQLTNNDFDFALYL    |
| DreriDIA1b  | 228 | FAKYLGACGRMVAVNYVG--EELWSFFNAP--WEKRVDLAKQLMDIAEQLTNNDFDFALYL    |
| DreriDIA1a  | 228 | FAKYLGACGRMVAVNYVG--EELWSFYNAP--WEKRVDLAKQLMDIAEQLTNNDFDFALYL    |
| BtaurDIA1   | 229 | FAKYLGACGRMVAVNYVG--EELWSYFNAP--WEKRVDLAWQLMEIAEQLTNNDFDFALYL    |
| PpygmDIA1   | 229 | FAKYLGACGRMVAVNYVG--EELWSYFNAP--WEKRVDLAWQLMEIAEQLTNNDFDFALYL    |
| CfamiDIA1   | 229 | FAKYLGACGRMVAVNYVG--EELWSYFNAP--WEKRVDLAWQLMEIAEQLTNNDFDFALYL    |
| PtrogDIA1   | 229 | FAKYLGACGRMVAVNYVG--EELWSYFNAP--WEKRVDLAWQLMEIAEQLTNNDFDFALYL    |
| TtrunDIA1   | 229 | FAKYLGACGRMVAVNYVG--EELWSYFNAP--WEKRVDLAWQLMEIAEQLTNNDFDFALYL    |
| HsapiDIA1   | 229 | FAKYLGACGRMVAVNYVG--EELWSYFNAP--WEKRVDLAWQLMEIAEQLTNNDFDFALYL    |
| MmulaDIA1   | 229 | FAKYLGACGRMVAVNYVG--EELWSYFNAP--WEKRVDLAWQLMEIAEQLTNNDFDFALYL    |
| PvampDIA1   | 229 | FAKYLGACGRMVAVNYVG--EELWSFFNAP--WEKRVDLAWQLMEIAEQLTNNDFDFALYL    |
| MdomeDIA1   | 229 | FAKYLGACGRMVAVNYVG--EELWSYFNAP--WEKRVDLAWQLMEIAEQLTNNDFDFALYL    |
| MmuscdIA1   | 229 | FAKYLGACGRMVAVNYVG--EELWSYFNAP--WEKRVDLAWQLMEIAEQLTNNDFDFALYL    |
| RnorvDIA1   | 229 | FAKYLGACGRMVAVNYVG--EELWSYFNAP--WEKRVDLAWQLMEIAEQLTNNDFDFALYL    |
| GgallDIA1   | 228 | FAKYLGACGRMVAVNYVG--EELWSYFNAP--WEKRVDLAWQLMEIAEQLTNNDFDFALYL    |
| XtropDIA1   | 228 | FAKYLGACGRMVAVNYVG--EELWSYFNAP--WEKRVDLAWQLMEIAEQLTNNDFDFALYL    |
| BflorDIA1   | 218 | FPFYFGACGRITVVQKCD--KTLASYYSAP--WLKRVELSLQMMKIAEYLTNNEADFGLYL    |
| SsalaDIA1R  | 234 | FPRYQGS CGRLMVWASS--RPLWGLY GSSRE FVQRVDVAYQLLHITQGLGHNSLGFLLYY  |
| DreriDIA1R  | 217 | FLRYHGS CGRLMVWAAS--RALRTL FSSP --LERRADLAYQLLHITQSLANSLSRFLRY   |
| RnorvDIA1R  | 236 | MPKYLGS CGRFLVSTST--RPLQEFYDAP--PEQAADIAYQLLGVLESLRSNDLNYFFFYF   |
| MmuscdIA1R  | 236 | MPRYLGSCGRFLVSTST--RPLQEFYDAS--PEQAADLAYQLLRVLESLRSNDLNYFFFYF    |
| MmulaDIA1R  | 234 | LPQYLGSCGRFLVSTST--RPLQEFYDAP--PDQAADLAYQLLGVLESLRSNDLNYFFFYF    |
| HsapiDIA1R  | 234 | LPKYLGS CGRFLVSTST--RPLQEFYDAP--PDQAADLAYQLLGVLESLRSNDLNYFFFYF   |
| BtaurDIA1R  | 234 | LPQYLGSCGRFLVSTST--SPLQEFYDAP--PDQAADLAYQLLGVLESLRSNDLNYFFFYF    |
| EcabaDIA1R  | 234 | LPRYLGSCGRFLVSTST--SPLQEFYSAP--PDQAADLAYQLLGVLESLRSNDLNYFFFYF    |
| DordiDIA1R  | 234 | LPKYLGS CGRFFVSTST--RPLQEFYDAP--PDEAADLAYQLLGVLESLRSNDLNYFFFYF   |
| MdomeDIA1R  | 233 | LPRYLGSCGRFLVSTST--QPLEEFYSSP--ADQAADLAYQLLGVLESLRNNDLNYFFFYF    |
| OanatDIA1R  | 233 | FPKYLGS CGRLVSTST--TPLLELSSGP--PDRAADLGHQLLGVLEFLRHNDWNYFFFYF    |
| GgallDIA1R  | 231 | FPRYLGSCGRLVVSAST--RPLRDFFRAA--PEVAADLALQLLAVLHSMGTNDLNYFFFYF    |
| BflorDIA1Lb | 326 | FPKYLGACGRVILVESGG--KLLGSAIESP--WKERANTIALQLLEMDKFRNGDPKVVVIF    |
| BflorDIA1Lc | 187 | FPKFYGACGRVIVVEHAG--RTLDTFMESS--WEVRADIALQLLQLVDAIREKDPDWVLF     |
| AaegyDIA1   | 197 | VPKLI FQGGFTLVESYEG--EALAKYYDRP--LNVRLLIANELIKASLNF TAGVDNFRFYL  |
| CpipiDIA1   | 199 | VPKVI FQGGFQLFESEFDG--DALVNFYDSS--LNIRLRIAKELIQASFLETEGVNGFRFYL  |
| DyakuDIA1   | 171 | VPTTYASCGLTHFQSYAG--RTL TN YFEGE--EDLRVELALQLMQLSLKLTFGFSDFRIFL  |
| DerecDIA1   | 172 | VPTTYASCGLTHFQAYAG--RTL TN YFEAE--EGLRMELALQLIQLSLKLTFGFSDFRIFL  |
| DmelaDIA1   | 174 | VPTTYASCGLTHFQSNAG--RTLAHYVDAE--EGLRVELALQLIQLSLKLTFGFADFRIIL    |
| DsechDIA1   | 176 | VPTPYASCGLTHFQSYAG--RTLAHYVNAE--EGLRLELALQLIQLSLKLTFGFADFRIIL    |
| DpersDIA1   | 175 | VPRSYAACGLTHFQAYAG--RTL VHYATAG--ENLRLEMARQLLQLSLKLTFGFADFRIFL   |
| DpseuDIA1   | 175 | VPRSYAACGLTHFQAYAG--RTL VHYATAG--ENLRLEMARQLLQLSLKLTFGFADFRIFL   |
| DananDIA1   | 175 | VPNTYAI CGLTHFQAYAG--RTL NHYTEAA--EDLRREIARQLIHLISLKLTFGFADFRIFL |
| DwillDIA1   | 161 | VPRSFVAVCGSTL FQAYAG--STLSNYLKAP--IDLRLMAKQLLQLALKLSAGFKGFRFYL   |
| NvitrDIA1   | 203 | TPKYFGACGRLIVEBYIG--LPLSSFIDEP--WIRRAKIASSLLQAADTLMSKNSEFAFYL    |
| SpurpDIA1L  | 306 | FTEYLGECGRVILTEPSG--KPLSSYLKAS--WKDRVDISLKIQLMLED FHDSSDKWLVL    |
| BflorDIA1La | 272 | IPAF LGACGNLVATETAG--KPLSMYLEVKGPWQVRANLSLQLIQMLDDFONKDPDWLLMF   |
| CinteDIA1   | 245 | FQRTVGS CGALMVHGRSIVTSLYELYDAP--WKVRLDVAIQLLDLAEHFYNDLNYMFAL     |
| AgambDIA1   | 207 | VPKLLHTFGFSIETVEG--KTL EHYDFP--FVTRMRIAELIRACFKFTEGIHGFRVFL      |
| consensus   | 361 | fpylgacGrim y g l fy ap wd rvdla qll iae lt nd ef lyl            |

... Motif 7

Motif 8

Motif 9

Motif 10 ...

|             |     |                     |                         |                      |             |            |
|-------------|-----|---------------------|-------------------------|----------------------|-------------|------------|
| SpurpDIA1   | 278 | TDVSEDNLAVND-NG     | ----EVLVIDAENIIVVDR     | KKIKEDANPGWDVKH      | ----QSEH    | EG         |
| NvectDIA1   | 274 | ADPAPGNFVSD-SG      | ----KVTLLDLEHLVVVDL     | SEVQMEEANDKPKPS      | -----D      |            |
| GaculDIA1   | 285 | LDVSFDNFVAVGPRDG    | ----KVIIVDAENVLVADKRLIK | QNKPKESFDVWY         | ----ESRFEE  |            |
| OlatiDIA1   | 285 | LDVSFDNFVAVGPRDG    | ----KVIIVDAENVLVADKRLIK | QNKPKESYDVWY         | ----ESRFEE  |            |
| TnigrDIA1   | 285 | LDVSFDNFVAVGPRDG    | ----KVIIVDAENVLVADKRLIK | QNKPENFDVWY          | ----ESRFEE  |            |
| TrubrDIA1   | 285 | LDVSFDNFVAVGPRDG    | ----KVIIVDAENVLVADKRLIK | QNKPENYDVWY          | ----ESRFEE  |            |
| DreriDIA1b  | 285 | LDVSFDNFVAVGPRDG    | ----KVIIVDAENVVVDKRLIK  | QNKPKESYDVWY         | ----ESRFEE  |            |
| DreriDIA1a  | 285 | LDVSFDNFVAVGPRDG    | ----KVIIVDAENVIVVDKRLV  | KQNKPKESYDVWY        | ----ESRYEE  |            |
| BtaurDIA1   | 286 | LDVSFDNFVAVGPRDG    | ----KVIIVDAENVLVADKRLIR | QNKPENWDVWY          | ----ESKFDD  |            |
| PpygmDIA1   | 286 | LDVSFDNFVAVGPRDG    | ----KVIIVDAENVLVADKRLIR | QNKPENWDVWY          | ----ESKFDD  |            |
| CfamiDIA1   | 286 | LDVSFDNFVAVGPRDG    | ----KVIIVDAENVLVADKRLIR | QNKPENWDVWY          | ----ESKFDD  |            |
| PtrogDIA1   | 286 | LDVSFDNFVAVGPRDG    | ----KVIIVDAENVLVADKRLIR | QNKPENWDVWY          | ----ESKFDD  |            |
| TtrunDIA1   | 286 | LDVSFDNFVAVGPRDG    | ----KVIIVDAENVLVADKRLIR | QNKPENWDVWY          | ----ESKFDD  |            |
| HsapiDIA1   | 286 | LDVSFDNFVAVGPRDG    | ----KVIIVDAENVLVADKRLIR | QNKPENWDVWY          | ----ESKFDD  |            |
| MmulaDIA1   | 286 | LDVSFDNFVAVGPRDG    | ----KVIIVDAENVLVADKRLIR | QNKPENWDVWY          | ----ESKFDD  |            |
| PvampDIA1   | 286 | LDVSFDNFVAVGPRDG    | ----KVIIVDAENVLVADKRLIR | QNKPENWDVWY          | ----ESKFDD  |            |
| MdomeDIA1   | 286 | LDVSFDNFVAVGPRDG    | ----KVIIVDAENVLVADKRLIR | QNKPENWDVWY          | ----ESKFDD  |            |
| MmuscdIA1   | 286 | LDVSFDNFVAVGPRDG    | ----KVIIVDAENVLVADKRLIR | QNKPENWDVWY          | ----ESKFDD  |            |
| RnorvDIA1   | 286 | LDVSFDNFVAVGPRDG    | ----KVIIVDAENVLVADKRLIR | QNKPENWDVWY          | ----ESKFDD  |            |
| GgallDIA1   | 285 | LDVSFDNFVAVGPRDG    | ----KVIIVDAENVLVADKRLIR | QNKPENWDVWY          | ----ESKFDD  |            |
| XtropDIA1   | 285 | LDVSFDNFVAVGPRDG    | ----KVIIVDAENVLVADKRLIK | QNKPENWDVWY          | ----ESKFDD  |            |
| BflorDIA1   | 275 | TDISYENFVTS-DG      | ----NLFVIDVENVIVVDK     | QKIKADKPRNWEARY      | ----QSHFDE  |            |
| SsalaDIA1R  | 292 | TRLGEDMFGILD-DQ     | ----RVFITDASSIGVID      | LEQGFPPDPPS-QTGS     | ----DGDIFS  |            |
| DreriDIA1R  | 273 | TRIPEDMFGILE-DN     | ----KVFIVDTSTIGI        | DLQEGHPPDK-D-LLPE    | ----ELDVFS  |            |
| RnorvDIA1R  | 292 | THVDAGMFGIFD-NG     | ----HLFIRDASALGIDK      | QEASQAAD---RTGE      | ----NEDIFS  |            |
| MmuscdIA1R  | 292 | THVDAGMFGIFD-NG     | ----HLFIRDASALGIDK      | QEGSQAAA---RTGE      | ----NEDIFS  |            |
| MmulaDIA1R  | 290 | THIDAGMFGVFN-NG     | ----HLFIRDASAVGVIDK     | QEGSQEAT---RAGE      | ----NKDIFS  |            |
| HsapiDIA1R  | 290 | THIDAGMFGVFN-NG     | ----HLFIRDASAVGVIDK     | QEGSQEAN---RAGE      | ----NKDIFS  |            |
| BtaurDIA1R  | 290 | THVDADMFGIFN-NG     | ----HLFIRDASALGVIDR     | QEGSQAAS---GAGD      | ----NKDIFS  |            |
| EcabaDIA1R  | 290 | THVDAGMFGIFN-NG     | ----HLFIRDASTLGVIDR     | QEGSQAAA---RAGE      | ----NKDIFS  |            |
| DordiDIA1R  | 290 | THVDAAMFGIFS-NG     | ----HLFIRDASALGVIDK     | QEGSQAAP---KAGE      | ----NQDIFS  |            |
| MdomeDIA1R  | 289 | TRIDAGTFGIFD-NG     | ----HLFIRDASTVGVIDK     | QRGSLTLD---RQEE      | ----SKDIFS  |            |
| OanatDIA1R  | 289 | TRIHAGTFGVFD-NG     | ----HLFIRDASSIGVIDR     | QEGKRPAR---SSPE      | ----PRDIFS  |            |
| GgallDIA1R  | 287 | TRVDVGTFGVFS-NG     | ----HLFIRDASTLGLIDK     | EEGSOPID---GQQE      | ----YKDIFS  |            |
| BflorDIA1Lb | 383 | VDFSFNFAVNN-YG      | ----RLTLIDFDVMLIDR      | EEFVGENK--TEPCD      | ----LKCFKT  |            |
| BflorDIA1Lc | 244 | LDVSFQNFVAVDS-RG    | ----WVRLIDLDDVMVIDR     | RTVVNQEQ--TEMCN      | ----EQCYTD  |            |
| AaegyDIA1   | 254 | TDISPDNIVSMSSEEE-I  | KVTFVDLNNVILDS          | SHSKRLKP-----SK      | ----QKHVHS  |            |
| CpipiDIA1   | 256 | TDINPDNIAVQAQPSGS-F | QVSFIDLDNVILDS          | QSKRLDRR-----SK      | ----ARNIHS  |            |
| DyakuDIA1   | 228 | TDFTGDNFAYDEHTK     | ----KVYLIDLDSVVLVD      | ----ASSAT            | ----GQ      | ----AEKYEP |
| DerecdIA1   | 229 | TDFTGDNFAYDEDSK     | ----RVYLIDLDSVVLVD      | ----ASSAA            | ----GQ      | ----AEKYVP |
| DmelaDIA1   | 231 | TDFTADNLAYDEDTK     | ----KVYLIDLDSVVLVD      | ----ASFAA            | ----GH      | ----AEKYEP |
| DsechDIA1   | 233 | TDFTADNLAYDEETK     | ----KVYLIDLDSVVLVD      | ----ASSMA            | ----GQ      | ----AEKYEP |
| DpersDIA1   | 232 | TDFTADNLAFDEASQ     | ----SVILIDLDSVVLVD      | ----AAVPL            | ----GD      | ----AQKYEP |
| DpseuDIA1   | 232 | TDFTADNLAFDEASQ     | ----SVILIDLDSVVLVD      | ----AAVPL            | ----GD      | ----AQKYEP |
| DananDIA1   | 232 | TDFTSDNLTFDEDTR     | ----RVLLIDLDSVVMVD      | ----AASTS            | ----GQ      | ----AEKYEP |
| DwillDIA1   | 218 | TDFTADNFAYNEANG     | ----TVLLIDMDTIVLVE      | SNDEAESES----QL      | ----SKKYKP  |            |
| NvitrDIA1   | 260 | TDISMDNIAVNNEK      | ----AIFVDLENIIVE        | KNPPEKALVGIESWNE     | ----TYTNAV  |            |
| SpurpDIA1L  | 363 | LDFGYENFVTS-EG      | ----QLKVVNLGGMVLVDK     | DQTSTTPDMNPHLNNRTELC | NEDCLN      |            |
| BflorDIA1La | 331 | VEVNIENFSVSS-DG     | ----RLILTDLGNMTI        | INKHDLKDNSTKKRSSVC   | ----NEACFK  |            |
| CinteDIA1   | 303 | HRLTPRDIIGISD-TG    | ----KLRIKNADNVILID      | ----NNSKN            | -----DKGLYE |            |
| AgambDIA1   | 264 | TDINPDNVVNLKNDNKQVY | VSIVDLDNVILLD           | SWAEVFLTKN-----TH    | HVHS        |            |
| consensus   | 421 | tdvs dnfav g        | kvliidaenvivvdk         | q                    |             | rfe        |

... Motif 10

Motif 11



|             |     |                          |                         |                            |
|-------------|-----|--------------------------|-------------------------|----------------------------|
| SpurpDIA1   | 328 | CGSRRECIMFSHTDLCNHYYS    | DHNYAVCQGLFGKDSPHGD     | -----GGLHSIP               |
| NvectDIA1   | 318 | CS-QPDCLSFSPSDMCSGGS     | RDHNYAICQGLLAGSSRRQ     | -----GLLHNPP               |
| GaculDIA1   | 336 | CD-REACLSFSKESLCSRVT     | VDHNYAVCONLLSRYATWRGTT  | -----GLLHDPP               |
| OlatiDIA1   | 336 | CD-REACLSFSKDSLCSRVT     | VDHNYAVCONLLSRYATWRGTT  | -----GLLHDPP               |
| TnigrDIA1   | 336 | CD-REACLSFSKDSLCSRVT     | VDHNYAVCONLLSRYATWRGTT  | -----GLLHDPP               |
| TrubrDIA1   | 336 | CD-REACLSFSKDSLCSRVT     | VDHNYAVCONLLSRYATWRGTT  | -----GLLHDPP               |
| DreriDIA1b  | 336 | CD-KEACLSFSKMDLCSRVT     | VDHNYAICONLLSRYATWRGSS  | -----GLLHDPP               |
| DreriDIA1a  | 336 | CD-KEACLSFSKDILCSRVT     | VDHNYAVCDLLSRFSSWRGST   | -----GLLHDPP               |
| BtaurDIA1   | 337 | CD-KEACLSFSKEILCARAT     | VDHNYAVCONLLSRHATWRGTS  | -----GLLHDPP               |
| PpygmDIA1   | 337 | CD-KEACLSFSKEILCARAT     | VDHNYAVCONLLSRHATWRGTS  | -----GLLHDPP               |
| CfamIDIA1   | 337 | CD-KEACLSFSKEILCARAT     | VDHNYAVCONLLSRHATWRGTS  | -----GLLHDPP               |
| PtrogDIA1   | 337 | CD-KEACLSFSKEILCARAT     | VDHNYAVCONLLSRHATWRGTS  | -----GLLHDPP               |
| TtrunDIA1   | 337 | CD-KEACLSFSKEILCARAT     | VDHNYAVCONLLSRHATWRGTS  | -----GLLHDPP               |
| HsapiDIA1   | 337 | CD-KEACLSFSKEILCARAT     | VDHNYAVCONLLSRHATWRGTS  | -----GLLHDPP               |
| MmulaDIA1   | 337 | CD-KEACLSFSKEILCARAT     | VDHNYAVCONLLSRHATWRGTS  | -----GLLHDPP               |
| PvampDIA1   | 337 | CD-KEACLSFSKEILCARVT     | VDHNYAVCONLLFRHATWRGTS  | -----GLLHDPP               |
| MdomeDIA1   | 337 | CD-KEACLSFSKEILCSRAT     | VDHNYAICONLLSRHATWRGTS  | -----GLLHDPP               |
| MmuscDIA1   | 337 | CD-KEACLSFSKEILCARVT     | VDHNYAVCONLLSRHATWRGTS  | -----GLLHDPP               |
| RnorvDIA1   | 337 | CD-KEACLSFSKEILCARVT     | VDHNYAVCONLLSRHATWRGTS  | -----GLLHDPP               |
| GgallDIA1   | 336 | CD-KEACLSFSKEILCARVT     | VDHNYAVCONLLSRHATWRGTS  | -----GLLHDPP               |
| XtropDIA1   | 336 | CD-KEACLSFSKEILCSRAT     | VDHNYAICONLLSRHATWRGTS  | -----GLLHDPP               |
| BflorDIA1   | 325 | CPGMSNCLSFVDSALCRYLHT    | DHNYAVCRNMLSEYASEMGKP   | -----GLLHDPP               |
| SsalaDIA1R  | 341 | CLGQGTSPCHR-SPPCSSVRPT   | QSLTLLCTALLPRLLLTERGAQT | TRLPMEGEAEAGRLA            |
| DreriDIA1R  | 321 | CL--SGSCVR--PPPETVREAQ   | SFILCKYILN-NLLTSN       | -----DKQSG-LP              |
| RnorvDIA1R  | 339 | CL-VSGCQVQ--MSSCDTVPEK   | QNLVLCQQLLP-QLLRG       | -----KFPSPVQ               |
| MmuscDIA1R  | 339 | CL-VSDCQIQ--LSSCDTVPEK   | QSLVLCQQLLP-QLLQG       | -----KFPSPVQ               |
| MmulaDIA1R  | 337 | CL-VSGCQAQ--LPSCEVSEK    | QSLVLCQQLLP-RLLQG       | -----RFPSPVQ               |
| HsapiDIA1R  | 337 | CL-VSGCQAQ--LPSCEVSEK    | QSLVLCQQLLP-RLLQG       | -----RFPSPVQ               |
| BtaurDIA1R  | 337 | CL-VSGCQIK--LPSCDTIPEK   | QNLVLCQQLLP-LLLQA       | -----KFPSPVQ               |
| EcabaDIA1R  | 337 | CL-LSDCQAE--LPSCDTVPEK   | QSLVLCQQLLP-RLLQG       | -----KFPSPVQ               |
| DordiDIA1R  | 337 | CL-VSGCQAQL-LPSCDNIPDK   | QSVLVCQQLLP-QLLQG       | -----KFPSPVQ               |
| MdomeDIA1R  | 336 | CL-VLDCQSP--FPSCSSVKEK   | QSMVMAQQQLLP-QLLKE      | -----KFPQPIQ               |
| OanatDIA1R  | 336 | CL-AADCQSD--LPSCNTVQEH   | QSLVLCRELLP-KLLEG       | -----KFPKPVQ               |
| GgallDIA1R  | 334 | CL-TVDCQSA--FVSCNSIREK   | QSLVMCQQLLP-KLLRG       | -----KFLPPVQ               |
| BflorDIA1Lb | 431 | FISQIEAMNSYDSCSAMPQYS    | QMMYALACVRLLSHLPEHLSEP  | --NPMDPKPKHRPDS            |
| BflorDIA1Lc | 292 | FQKKLYS-DEYH-CDDIFKYAP   | MMYASICARLLSNLQKHPERR   | KWGEIREYQEQSIELD           |
| AaegyDIA1   | 302 | RIDCDGCFAYIQEDICVHQIS    | DINLFAVCQLLENLNGDSKR    | -----GFLHSLG               |
| CpipiDIA1   | 305 | RIPCDGCFAYVQEDICSYQHS    | DINQFAICQLLYENLNGDREG   | -----GFLHIQP               |
| DyakuDIA1   | 270 | -LPGEG-FTFDVSAFCSGHQL    | DANIYQACLLLRDYLLKLNLDN  | -----                      |
| DerecDIA1   | 271 | -LPGEG-FTFDVSAFCSGHQL    | DANIYQACLLLRDFLLKLNLDN  | -----                      |
| DmelaDIA1   | 273 | -LTGEG-FTFDVSAFCSGHQL    | DANIYQACLLLRDYLLKLNLDN  | -----                      |
| DsechDIA1   | 275 | -LAGEG-FTFDVSAFCSGHQL    | DANIYQACLLLRDSLLKLNLDN  | -----                      |
| DpersDIA1   | 274 | -LPGDG-FTFDVKSFCGGQQL    | DANVYQACLLKDFLLRDLAN    | -----                      |
| DpseuDIA1   | 274 | -LPGDG-FTFDVKSFCGGQQL    | DANVYQACLLKDFLLRDLAN    | -----                      |
| DananDIA1   | 274 | -LPGEG-FTFDVSAFCSGRQL    | DANVYQACLLLRDFLLKDLDN   | -----                      |
| DwillDIA1   | 264 | -FPGEG-FTYDVNAFCDNQDL    | DANIYQVCLLRDQLLPDVKN    | -----                      |
| NvitrDIA1   | 310 | DLDCQDCFVFSFNDICSHKVS    | DHNYAICQHLLTQALGAVFHN   | -----QGLHDPP               |
| SpurpDIA1L  | 418 | TFVKQLQTEPDTHCREVPRH     | VELMYMMACHSLLSDLMTTKYER | -----FFQPLDTPR             |
| BflorDIA1La | 381 | RFTRNLSHRPETS            | CRQAGRYSQLMYARACRILG    | CWQTERSGE-----GRVVLSSSKDAS |
| CinteDIA1   | 342 | VRYKQEKVDITEENLCDHSE     | NDVNYVICRHFLLGGTWKERK   | GK-----KYPGGLLHDPK         |
| AgambDIA1   | 313 | KIECNCFAYVQEDVCRYQNS     | DLNLEATCOLLENLNGHYAK    | -----GLLHYDR               |
| consensus   | 481 | c eac sf lc vd nyavCq ll |                         | g lh                       |

Motif 12

Motif 13

Motif 14 ...

|             |     |                                                         |
|-------------|-----|---------------------------------------------------------|
| SpurpDIA1   | 377 | SDL-----SSYMRAKVKGQIAECSRPSK--RDGRYLVVKELKETLM-----     |
| NvectDIA1   | 365 | -----VALKASLNQLLQDCTAQDM--RNTREETAQKLSELLQ-----         |
| GaculDIA1   | 386 | AH-----IAKDGQLLTLLEDECTRPKK--RYGRFOAAKELREYLT-----      |
| OlatiDIA1   | 386 | AH-----IAKDGQLEALLDECTRPKK--RYGRFOAAKELREYLT-----       |
| TnigrDIA1   | 386 | AH-----IAKDGQLEALLDECTKPKK--RYGRFOAAKELREYLT-----       |
| TrubrDIA1   | 386 | AH-----IAKDGQLEALLDECTKPKK--RFGRFOAAKELREYLT-----       |
| DreriDIA1b  | 386 | PH-----IAKDGQLEALLEECANPKK--RYGRFOAAKELRDYLT-----       |
| DreriDIA1a  | 386 | PD-----VVKDGRLLIALLDECTRPQK--RYGRFOAAKELREFLT-----      |
| BtaurDIA1   | 387 | SE-----IAKDGRLLEALLDECANPKK--RYGRFOAAKELREYLA-----      |
| PpygmDIA1   | 387 | SE-----IAKDGRLLEALLDECANPKK--RYGRFOAAKELREYLA-----      |
| CfamiDIA1   | 387 | SE-----IAKDGRLLEALLDECANPKK--RYGRFOAAKELREYLA-----      |
| PtrogDIA1   | 387 | SE-----IAKDGRLLEALLDECANPKK--RYGRFOAAKELREYLA-----      |
| TtrunDIA1   | 387 | SE-----IAKDGRLLEALLDECANPKK--RYGRFOAAKELREYLA-----      |
| HsapiDIA1   | 387 | SE-----IAKDGRLLEALLDECANPKK--RYGRFOAAKELREYLA-----      |
| MmulaDIA1   | 387 | SE-----IAKDGRLLEALLDECANPKK--RYGRFOAAKELREYLA-----      |
| PvampDIA1   | 387 | SE-----IAKDGRLLEALLDECANPKK--RYGRFHAAKELREYLA-----      |
| MdomeDIA1   | 387 | GE-----IAKDGRLLEALLDECAHPKK--RFGRFOAAKELREYLA-----      |
| MmuscdIA1   | 387 | SE-----IAKDGRLLEALLDECTNPKK--RYGRFOAAKELRGYLA-----      |
| RnorvDIA1   | 387 | SE-----IAKDGRLLEALLDECTNPKK--RYGRFOAAKELRGYLA-----      |
| GgallDIA1   | 386 | AD-----IAKDGRLLEALLDECANPKK--RYGRFOAAKELREYLA-----      |
| XtropDIA1   | 386 | AE-----IAKDGRLLEALLDECANPKK--RYGRFKSAKELREYLA-----      |
| BflorDIA1   | 376 | ET-----VVRDGTLQRLLAECAKPRT--LYGRFDAAKELIELLG-----       |
| SsalaDIA1R  | 400 | RDV-----PLLLGVCADPSQPDWRIMAA--VGSLMDLLKPMRPCNP-----     |
| DreriDIA1R  | 364 | RAA-----VDELLVCADPSQLDQTIIKS--VQSLKNILKTLRPCSP-----     |
| RnorvDIA1R  | 382 | QEI-----DSALSLSCKDASTNLEVFGA--TSLLKNILRSLRRTCDP-----    |
| MmuscdIA1R  | 382 | KEI-----DSALSLSCKDNSTDLEVLGA--TSWLKDILRSLRRTCDP-----    |
| MmulaDIA1R  | 380 | DDI-----DSALAQCGDSTRPDPEVLGA--ASWLKHILRPLRRTCDP-----    |
| HsapiDIA1R  | 380 | DDI-----DSILVQCGDSIRPDPEVLGA--ASQLKDILRPLRRTCDP-----    |
| BtaurDIA1R  | 380 | E EI-----DAELTRCADGTRPDPEVLGA--ASRLKDILRPLRRTCDP-----   |
| EcabaDIA1R  | 380 | E EI-----DATLTWCGEDTRPDAEVLGA--ASRLKDILRPLRRTCDP-----   |
| DordiDIA1R  | 381 | VEI-----DSALAQCGGIRPDSEVFGA--ASRLKDILRPLRRTCDP-----     |
| MdomeDIA1R  | 379 | EQI-----DSALVLCGNSSLSDQEVIEA--ASRLKAILKPLRRTCDP-----    |
| OanatDIA1R  | 379 | E EI-----DALLDRCGDSSLDGQTVIGG--ARRLMDILKSLRRTCDP-----   |
| GgallDIA1R  | 377 | EKI-----DSFLQHCAGEGLADDQVNEA--MAKLAQLLKPLRSCDS-----     |
| BflorDIA1Lb | 489 | RP---RLLWGPPEQEAKVLEELLRGCVEENV--AGGRLEAVGELKTFILR----- |
| BflorDIA1Lc | 350 | EPPVKGFLHNPPDEIREALEGALTQCVHETL--PRGRLGAVLRLOEILG-----  |
| AaegyDIA1   | 351 | TDS-----KLEAFRKLHLHQCVYQPPYCEDRQEVLRIMEITH-----         |
| CpipiDIA1   | 354 | NDD-----SQPRLSEIRQLLHHCVYCVPPDCRDRQGLLQQVQEIID-----     |
| DyakuDIA1   | 310 | -----ERLQLLLEQCVCACQDDFCDMRFQHAYDLIKMLD-----            |
| DerecdIA1   | 311 | -----ERLQLLLEQCVCACQDDFCDMRFQHAYDLIKVLD-----            |
| DmelaDIA1   | 313 | -----EKLQLLLEQCVCACQDDFCDMRFQHAYDLIKVLE-----            |
| DsechDIA1   | 315 | -----EKLQLLLEQCVCACQDDFCDMRFQHAYDLIKBLE-----            |
| DpersDIA1   | 314 | -----GRLEMLLEQCVCRCDDATCDMRFQAYDLIKLLG-----             |
| DpseuDIA1   | 314 | -----GRLEMLLEQCVCRCDDATCDMRFQAYDLIKLLG-----             |
| DananDIA1   | 314 | -----ERLQLLLEKVCVEQDDLCDMRFQYAYDLIKLLD-----             |
| DwillDIA1   | 304 | -----HRLKEMLNDCVQCEDDKCDIRFKYANNLIDLLV-----             |
| NvitrDIA1   | 361 | D-----YILQKHPTLIDLLEQCAKPDIG--YSRIDIAHKLIVLLD-----      |
| SpurpDIA1L  | 470 | KHHPGMLHDAPYEVDSVLSELLYECVFEGQ--PGRRMHSVRVLRLLLT-----   |
| BflorDIA1La | 436 | CAYGRGLLFGPPREAKQELLEDLLTECVEETK--AGGRITALKQIRVLLA----- |
| CinteDIA1   | 396 | EFG-----VFSSQMFVLLDICSRGKTAVAPERRTLSHSIRRLAANQLRNVLERRR |
| AgambDIA1   | 362 | DAEAFP----VLGEASKMLQNLLESCVYQPPDCQNRSHILKMDLHITD-----   |
| consensus   | 541 | d le lldec rfq akelr l                                  |

... Motif 14

Motif 15

|             |     |      |                                 |                       |
|-------------|-----|------|---------------------------------|-----------------------|
| SpurpDIA1   | 416 | ---K | LIT                             | -----                 |
| NvectDIA1   | 400 | ---  | GYL                             | -----                 |
| GaculDIA1   | 423 | ---  | Q                               | LAASSSATAR-----       |
| OlatiDIA1   | 423 | ---  | K                               | LAASSSATS-----        |
| TnigrDIA1   | 423 | ---  | Q                               | LA-----               |
| TrubrDIA1   | 423 | ---  | Q                               | LAASSSLVSAR-----      |
| DreriDIA1b  | 423 | ---  | Q                               | LSGSAR-----           |
| DreriDIA1a  | 423 | ---  | Q                               | LQTQTSNADR-----       |
| BtaurDIA1   | 424 | ---  | Q                               | LSNNVR-----           |
| PpygmDIA1   | 424 | ---  | Q                               | LSNNVR-----           |
| CfamiDIA1   | 424 | ---  | Q                               | LSNNVR-----           |
| PtrogDIA1   | 424 | ---  | Q                               | LSNNVR-----           |
| TtrunDIA1   | 424 | ---  | Q                               | LSNNVR-----           |
| HsapiDIA1   | 424 | ---  | Q                               | LSNNVR-----           |
| MmulaDIA1   | 424 | ---  | Q                               | LSNNVR-----           |
| PvampDIA1   | 424 | ---  | Q                               | LSNNVR-----           |
| MdomeDIA1   | 424 | ---  | Q                               | LSNNGR-----           |
| MmuscDIA1   | 424 | ---  | Q                               | LSHNVR-----           |
| RnorvDIA1   | 424 | ---  | Q                               | LSHNVR-----           |
| GgallDIA1   | 423 | ---  | Q                               | LSNNVR-----           |
| XtropDIA1   | 423 | ---  | Q                               | LSNNAR-----           |
| BflorDIA1   | 413 | ---  | S                               | FLKDR-----            |
| SsalaDIA1R  | 439 | ---  | H                               | YTYRYPECRYNQDY-----   |
| DreriDIA1R  | 403 | ---  | Q                               | YAYRYPECLYSDKF-----   |
| RnorvDIA1R  | 421 | ---  | R                               | FAYRYPDCKYNDRF-----   |
| MmuscDIA1R  | 421 | ---  | R                               | FAYRYPDCKYNDRF-----   |
| MmulaDIA1R  | 419 | ---  | R                               | FAYRYPDCKYNDKF-----   |
| HsapiDIA1R  | 419 | ---  | R                               | FAYRYPDCKYNDKF-----   |
| BtaurDIA1R  | 419 | ---  | R                               | FAYRYPDCKYDDKF-----   |
| EcabaDIA1R  | 419 | ---  | R                               | FAYRYPDCKYNDKF-----   |
| DordiDIA1R  | 420 | ---  | R                               | FAYRYPDCKYNDRF-----   |
| MdomeDIA1R  | 418 | ---  | R                               | YAYRYPDCKYSDRY-----   |
| OanatDIA1R  | 418 | ---  | R                               | FAYRYPDCKYSEKY-----   |
| GgallDIA1R  | 416 | ---  | R                               | FAYRYPDCKYSDKY-----   |
| BflorDIA1Lb | 533 | ---  | R                               | NAKGEN-----           |
| BflorDIA1Lc | 397 | ---  | T                               | T-----                |
| AaegyDIA1   | 389 | ---  | D                               | VLHEVV-----           |
| CpipiDIA1   | 395 | ---  | G                               | LVES-----             |
| DyakuDIA1   | 343 | ---  | S                               | KN-----               |
| DerecDIA1   | 344 | ---  | S                               | KI-----               |
| DmelaDIA1   | 346 | ---  | S                               | NN-----               |
| DsechDIA1   | 348 | ---  | S                               | KN-----               |
| DpersDIA1   | 347 | ---  | E                               | LGS-----              |
| DpseuDIA1   | 347 | ---  | E                               | LGS-----              |
| DananDIA1   | 347 | ---  | S                               | -----                 |
| DwillDIA1   | 337 | ---  | E                               | INNKIEIL-----         |
| NvitrDIA1   | 399 | ---  | S                               | VIKNA-----            |
| SpurpDIA1L  | 517 | ---  | I                               | IQRGFSYKDAADRTSL----- |
| BflorDIA1La | 483 | ---  | A                               | -----                 |
| CinteDIA1   | 446 | I    | CSPDFKYRYPECELAEDAGINLPSIELQWLH |                       |
| AgambDIA1   | 407 | ---  | Q                               | TIIQS-----            |
| consensus   | 601 |      | 1                               |                       |
