# Supplementary material for: Characterization of the Deleted in Autism 1 Protein Family: Implications for Studying Cognitive Disorders
Source: PubMed Central journal article supplement (PMC3023760; doi:10.1371/journal.pone.0014547), 2011-01-19
Supplement: pone.0014547.s020.pdf [file pone.0014547.s020.pdf]

## Fig. S10

```
>GaculDIA1
MLRFLPLKLGRLYRCLKLLLVVGLFVILLMNTHSLFASFQKNETDRRFINLNKCPACFG
  TSWCRKFMNGQVSFETWGRRLRFLDVFNVKNVYFAQYGEPEGRRRVVLKRLGSQLAEI
  DQKICKRATGRPRCDLIQAMYKTEFARINGDVRLLTPEVVEGWSDLVHCPSQLRLLDRVVR
  RYAETKDSGSFLLKLNKDKTERMQLLMTLAFNPEPLVLQ
SFPSDEGWPFYKYLGCGRMV
  AVNYVGEELWSFYFAPWEKRVDLARQLMDIAEQLTNNDFFDALYLLDVSFDNFVAVGPRDG
  KVIIVDAENVLVADKRLIKQNKPEFSDVWYESRFEECDREACLSFSKESLCSRVTVDHNY
  YAVCQNLRSRYATWRGTGGLLHDPFAHIAKDGQLLTLLEDECTRPKKRYGRFQAAKELRE
  YLTQLAAASSSATAR
>TtrunDIA1
MWRLVPPKLGRLSRSLKLAALGSLVLMVLHSPSLLASWQRNELADRRFLQLNKCPACFG
  TSWCRRFLNGQVVFEEAWGRLRLLDLFLNVKNVYFAQYGEPEGRRRVVLKRLGSQLAEI
  LDQSI CKRATGRPRCDLLQAMPRTTEFARLNGDVRLLTPEAVEGWSDLVHCPSQLRLLDRLV
  RRYAETKDSGSFLLRNLKDSERMQLLTLAFNPEPLVLQSFPSDEGWPFYKYLGCGRMV
  AVNYVGEELWSFYFAPWEKRVDLAWQLMEIAEQLTNNDFFDALYLLDVSFDNFVAVGPRDG
  KVIIVDAENVLVADKRLIRQNKPENWDVWYESKFDCCDKEACLSFSKESLILCARATVDHNY
  YAVCQNLRSRHATWRGTSGLLHDPPEIAKDGRLLEALDECANPKKRYGRFQAAKELRE
  YLAQLSNNVR
>PvampDIA1
MWRLVPPKLGRLSRSLKLAALGSLVLMVLHSPSLLASWQRNELADRRFLQLNKCPACFG
  TSWCRRFLNGQVVFEEAWGRLRLLDLFLNVKNVYFAQYGEPEGRRRVVLKRLGSQLAEI
  LDQSI CKRATGRPRCDLLQAMPRTTEFARLNGDVRLLTPEAVEGWSDLVHCPSQLRLLDRLV
  RRYAETKDSGSFLLRNLKDSERMQLLTLAFNPEPLVLQSFPSDEGWPFYKYLGCGRMV
  AVNYVGEELWSFYFAPWEKRVDLAWQLMEIAEQLTNNDFFDALYLLDVSFDNFVAVGPRDG
  KVIIVDAENVLVADKRLIRQNKPENWDVWYESKFDCCDKEACLSFSKESLILCARATVDHNY
  YAVCQNLRSRHATWRGTSGLLHDPPEIAKDGRLLEALDECANPKKRYGRFQAAKELRE
  YLAQLSNNVR
>OlatidIA1
MLRFLPLKLGRLYRCLKLLFLVGLFVILLMNTHSLFASFQKNETDRRFINLNKCPACFG
  TSWCRKFMNGQVSFETWGRRLRFLDVFNVKNVYFAQYGEPEGRRRVVLKRLGSQLAEI
  DQKICKRATGRPRCDLVQAMYKTEFARINGDVRLLTPEVVEGWSDLVHCPSQLRLLDRVVR
  RYAETKDSGSFLLKLNKDKTERMQLLMTLAFNPEPLVLQSFPSDEGWPFYKYLGCGRMV
  AVNYVGEELWSFYFAPWEKRVDLARQLMDIAEQLTNNDFFDALYLLDVSFDNFVAVGPRDG
  KVIIVDAENVLVADKRLIKQNKPEFSDVWYESRFEECDREACLSFSKESLCSRVTVDHNY
  YAVCQNLRSRYATWRGTGGLLHDPFAHIAKDGQLLEALDECTRPKKRYGRFQAAKELRE
  LTKLAAASSSATS
>HsapiDIA1
MWRLVPPKLGRLSRSLKLAALGSLVLMVLHSPSLLASWQRNELADRRFLQLNKCPACFG
  TSWCRRFLNGQVVFEEAWGRLRLLDLFLNVKNVYFAQYGEPEGRRRVVLKRLGSQLAEI
  LDQSI CKRATGRPRCDLLQAMPRTTEFARLNGDVRLLTPEAVEGWSDLVHCPSQLRLLDRLV
  RRYAETKDSGSFLLRNLKDSERMQLLTLAFNPEPLVLQSFPSDEGWPFYKYLGCGRMV
  AVNYVGEELWSFYFAPWEKRVDLAWQLMEIAEQLTNNDFFDALYLLDVSFDNFVAVGPRDG
  KVIIVDAENVLVADKRLIRQNKPENWDVWYESKFDCCDKEACLSFSKESLILCARATVDHNY
  YAVCQNLRSRHATWRGTSGLLHDPPEIAKDGRLLEALDECANPKKRYGRFQAAKELRE
  YLAQLSNNVR
>MmuscDIA1
MWRLVPLKLGRLSRSLKLAALGSLVLMVLLHSPSLLASWQRNELADRRFLQLNKCPACFG
  TSWCRRFLNGQVVFEEAWGRLRLLDLFLNVKNVYFAQYGEPEGRRRVVLKRLGSQLAEI
  LDQSI CKRATGRPRCDLLQAMPRTTEFARLNGDVRLLTPEAVEGWSDLVHCPSQLRLLDRLV
  RRYAETKDSGSFLLRNLKDSERMQLLTLAFNPEPLVLQSFPSDEGWPFYKYLGCGRMV
  AVNYVGEELWSFYFAPWEKRVDLAWQLMEIAEQLTNNDFFDALYLLDVSFDNFVAVGPRDG
  KVIIVDAENVLVADKRLIRQNKPENWDVWYESKFDCCDKEACLSFSKESLILCARATVDHNY
  YAVCQNLRSRHATWRGTSGLLHDPPEIAKDGRLLEALDECTNPKKRYGRFQAAKELRG
  YLAQLSHNVR
>MmuladIA1
MWRLVPPKLGRLSRSLKLAALGSLVLMVLHSPSLLASWQRNELADRRFLQLNKCPACFG
  TSWCRRFLNGQVVFEEAWGRLRLLDLFLNVKNVYFAQYGEPEGRRRVVLKRLGSQLAEI
  LDQSI CKRATGRPRCDLLQAMPRTTEFARLNGDVRLLTPEAVEGWSDLVHCPSQLRLLDRLV
  RRYAETKDSGSFLLRNLKDSERMQLLTLAFNPEPLVLQSFPSDEGWPFYKYLGCGRMV
  AVNYVGEELWSFYFAPWEKRVDLAWQLMEIAEQLTNNDFFDALYLLDVSFDNFVAVGPRDG
  KVIIVDAENVLVADKRLIRQNKPENWDVWYESKFDCCDKEACLSFSKESLILCARATVDHNY
  YAVCQNLRSRHATWRGTSGLLHDPPEIAKDGRLLEALDECANPKKRYGRFQAAKELRE
  YLAQLSNNVR
>PtrogDIA1
MWRLVPPKLGRLSRSLKLAALGSLVLMVLHSPSLLASWQRNELADRRFLQLNKCPACFG
  TSWCRRFLNGQVVFEEAWGRLRLLDLFLNVKNVYFAQYGEPEGRRRVVLKRLGSQLAEI
  LDQSI CKRATGRPRCDLLQAMPRTTEFARLNGDVRLLTPEAVEGWSDLVHCPSQLRLLDRLV
  RRYAETKDSGSFLLRNLKDSERMQLLTLAFNPEPLVLQSFPSDEGWPFYKYLGCGRMV
  AVNYVGEELWSFYFAPWEKRVDLAWQLMEIAEQLTNNDFFDALYLLDVSFDNFVAVGPRDG
  KVIIVDAENVLVADKRLIRQNKPENWDVWYESKFDCCDKEACLSFSKESLILCARATVDHNY
  YAVCQNLRSRHATWRGTSGLLHDPPEIAKDGRLLEALDECANPKKRYGRFQAAKELRE
  YLAQLSNNVR
>CfamidiA1
```

MWRLVPPKLGRLSRSLKLAALGSLVLMVLHSPSLLASWQRNELADRRFLQLNKCPACFG  
TSWCRRFLNGQVVFEEAWGRLRLDLDFLNKKNVYFAQYGEPEGRRRVVVKRLGSQRELAQ  
LDQSI CKRATGRPRCDLLQAMPRTTEFARLNGDVRLLTPEAVEGWSDLVHCPQSQRLLDRLV  
RRYAETKDSGSFLLRNLKDSERMQLLLTLAFNPEPLVLSQSFPSDEGWPFACYLGACGRMV  
AVNYVGEELWSYFNAPWEKRVDLAWQLMEIAEQLTNNDFEFALYLLDVSFDNFVAVGPRDG  
KVIIVDAENVLVADKRLIRQNKPENWDVWYESKFDDCDKEACLSFSKEILCARATVDHNY  
YAVCQNLLSRHATWRGTSGGLLHDPPEIAKDGRLLEALLDECANPKKRYGRFQAQAKELRE  
YLAQLSNNVR

>BtaurDIA1

MWRLVPPKLGRLSRSLKLAALGSLVLMVLHSPSLLASWQRNELADRRFLQLNKCPACFG  
TSWCRRFLNGQVVFEEAWGRLRLDLDFLNKKNVYFAQYGEPEGRRRVVVKRLGSQRELAQ  
LDQSI CKRATGRPRCDLLQAMPRTTEFARLNGDVRLLTPEAVEGWSDLVHCPQSQRLLDRLV  
RRYAETKDSGSFLLRNLKDSERMQLLLTLAFNPEPLVLSQSFPSDEGWPFACYLGACGRMV  
AVNYVGEELWSYFNAPWEKRVDLAWQLMEIAEQLTNNDFEFALYLLDVSFDNFVAVGPRDG  
KVIIVDAENVLVADKRLIRQNKPENWDVWYESKFDDCDKEACLSFSKEILCARATVDHNY  
YAVCQNLLSRHATWRGTSGGLLHDPPEIAKDGRLLEALLDECANPKKRYGRFQAQAKELRE  
YLAQLSNNVR

>MdomeDIA1

MWRLVPPKLGRLSRSLKLAALGSLVLMVLHSPSLLASWQRNELADRRFLQLNKCPACFG  
TSWCRRFLNGQVVFEEAWGRLRLDLDFLNKKNVYFQYGEPEGRRRVVVKRLGSQRELAQ  
LDQSI CKRATGRPRCDLLQAMPKTEFARLNGDVRLTTPDAVEGWSDLVHCPQSQRLLDRLV  
RRYAETKDSGSFLLRNLKDSERMQLLLTLAFNPEPLVLSQSFPSDEGWPFACYLGACGRMV  
AVNYVGEELWSYFNAPWEKRVDLAWQLMEIAEQLTNNDFEFALYLLDVSFDNFVAVGPRDG  
KVIIVDAENVLVADKRLIRQNKPENWDVWYESKFDDCDKEACLSFSKEILCSRATVDHNY  
YAICQNLLSRHATWRGTSGGLLHDPPEIAKDGRLLEALLDECAHPKRFGRFQAQAKELRE  
YLAQLSNNGR

>RnorvDIA1

MWRLVPLKLGRLSRALKLAALGSLVLMMLHSPSLLASWQRNELADRRFLQLNKCPACFG  
TSWCRRFLNGQVGFETWGRRLRLDLDFLNKKNVYFAQYGEPEGRRRVVVKRLGSQRELAQ  
LDQSI CKRATGRPRCDLLQAMPRTTEFARLNGDVRLLTPEAVEGWSDLVHCPQSQRLLDRLV  
RRYAETKDSGSFLLRNLKDSERMQLLLTLAFNPEPLVLSQSFPSDEGWPFACYLGACGRMV  
AVNYVGEELWSYFNAPWEKRVDLAWQLMEIAEQLTNNDFEFALYLLDVSFDNFVAVGPRDG  
KVIIVDAENVLVADKRLIRQNKPENWDVWYESKFDDCDKEACLSFSKEILCARVTVDHNY  
YAVCQNLLSRHATWRGTSGGLLHDPPEIAKDGRLLEALLDECTNPKKRYGRFQAQAKELRG  
YLAQLSHNVR

>XtropDIA1

MLRLASLKFGRIFRYAKVLF AASLLVVMMLNTHSLSSFORNELTDRRFLSLNKCPACFG  
TSWCRRKFMNGQLSFEWGRRLRLDLDFNVKNVHFAQYGEPEGRRRVVVKRLGNSNHELSEL  
DQRICKKATGRPRCDLVQAMYKTDFARLNGDVRLTTPDVVEGWSDLVHCPQSQRLLDRLV  
RYAETKDSGSFLLRNLKDSERMQLLLTLAFNPEPLVLSQSFPSDEGWPFACYLGACGRMVA  
VNYVGEELWSYFNAPWEKRVDLAWQLMEIAEQLTNNDFEFALYLLDVSFDNFVAVGPRDGK  
VIIVDAENVLVADKLIKQNKPENWDVWYESKFDDCDKEACLSFSKEILCSRATVDHNY  
AICQNLLSRHATWRGTSGGLLHDPPEIAKDGRLLEALLDECANPKKRYGRFKSAKELREY  
LAQLSNNAR

>GgallDIA1

MLRLVSLKLGRLRYRYKLAVALGSLAAALVLNTHSLASLQRNELAERRFLQLNKCPACWG  
TSWCRRFLNGQLRLESWGRRLRLDFFNKKNVYFARYGEPEGRRRVVVKRLGSAQELADI  
DAKICRRATGRGRCDLLQALHATEFASLNGDVRLTTPDAVEGWSDLVHCPQSQRLLDRLV  
RYAETKDSGSFLLRNLKDSERMQLLLTLAFNPEPLVLSQSFPSDEGWPFACYLGACGRMVA  
VNYVGEELWSYFNAPWEKRVDLAWQLMEIAEQLTNNDFEFALYLLDVSFDNFVAVGPRDGK  
VIIVDAENVLVADKRLIRQNKPENWDVWYESKFDDCDKEACLSFSKEILCARVTVDHNY  
AVCQNLLSRHATWRGTSGGLLHDPPEIAKDGRLLEALLDECANPKKRYGRFQAQAKELREY  
LAQLSNNVR

>TnigrDIA1

MLRFLPLKLGRLRYRCLKLLLVVGLFVILLMNTHNLFASFQKNETDRRFINLNKCPACFG  
TSWCRRKFMNGQVSFETWGRRLRFLDFNVKNVYFAQYGEPEGRRRVVVKRLGNSQELADI  
DQKICKRATGRPRCDLIQAMYKTEFARLNGDVRLTTPDVVEGWSDLVHCPQSQRLLDRVVR  
RYAETKDSGSFLLKLNKDSERMQLLMTLAFNPEPLVLSQSFPSDEGWPFACYLGACGRVVA  
VNYVGEELWSYFNAPWEKRVDLARQLMDIAEQLTNNDFEFALYLLDVSFDNFVAVGPRDGK  
VIIVDAENVLVADKRLIKQNKPENFDVWYESRFEEDCDREACLSFSKSLCSRVTVDHNY  
AVCQNLLSRYATWRGTGGGLLHDPPEIAKDGQLEALLDECTKPKKRYGRFQAQAKELREY  
LTQLA

>DreerDIA1b

MLRFLPLKLGRLRYRCLKLLLVVGLFVILLMNTHNLFASFQKNETDRRFINLNKCPACFG  
TSWCRRKFMNGQISFETWGRRLRFLDFNVKNVYFAQYGEPEGRRRVVVKRLGNSQELADI  
DQKICKRATGRPRCDLIQAMYKTEFARLNGDVRLTTPDVVEGWSDLVHCPQSQRLLDRVVR  
RYAETKDSGSFLLKLNKDSERMQLLMTLAFNPEPLVLSQSFPSDEGWPFACYLGACGRMVA  
VNYVGEELWSYFNAPWEKRVDLAKQLMDIAEQLTNNDFEFALYLLDVSFDNFVAVGPRDGK  
VIIVDAENVLVADKRLIKQNKPENFDVWYESRFEEDCDREACLSFSKMLCSRVTVDHNY  
AICQNLLSRYATWRGTSGGLLHDPPEIAKDGQLEALLECANPKKRYGRFQAQAKELRDY  
LTQLSGSAR

>DreerDIA1a

MLRILSLKFGRVYRCGKFLFIVALFVILLMNTHNLFASFQRNELTDRRFI GLNKCPACFG  
TSWCRRKFMNGQVTFEMWGRRLRFLDFFNKKNVYFAQYGEPEGRRRVVVKRLGNSQELAEI  
DQKICKRATGRPRCDLIQSMYKTEFARLNGDVRLTPEVVEGWSDLVHCPQSQRLLDRVVR  
RYAETKDSGSFLLKLNKDSERMQLLMTLAFNPEPLVLSQSFPSDEGWPFACYLGACGRMVA  
VNYVGEELWSYFNAPWEKRVDLAKQLMDIAEQLTNNDFEFALYLLDVSFDNFVAVGPRDGK

VVIDAENVIVDKRLVKQNKPEYDWWYESRYEECDKEACLSFSKDLCSRVTVDHNY  
AVCQDLLSRFSSWRGSTGGLLDHPPDPVVKDGRLLIALLDECTRPQKRYGRFQAAKELREF  
LTQLTQTSNADR  
>SpurpDIA1  
MRRYFNQFTNRFICISTTQQLIWLVLVSSMCLFVYQYLHFTANHLEN  
EYFTEATKCPACFGTSLCKRFRSGDYRFHSYSSIRLFDYVNVKNVYFATYLDQKPVVMKK  
LGHNSEHNQFDDDLCTNAESGLRGCDVSQQIYKSKLSDIMYAERLEEKDVMGLSDIVRCP  
SRRLLDRIDWTFGERQFDKSLARDHKLMLATTIAFNPEPLILQAFPNRKGWPFPAVMGAC  
GRFTVQEYSGHLSYFYKFKFVRAALAVQALKIAEQLESENREDFALYLTDVSEDNLAVN  
DNGEVLVIDAENIIVDRKKIKEDANPGWDVKHQSEHEGCGSRRECIMFSHTDLCNHYS  
DHNYAVCQGLFGKDSPHGDGGLLHSPDLSSYMRKAVKQGIAECSRSPSKRDGRYLVVK  
ELKETLMLKIT  
>NvitrDIA1  
MLVTKASVSSFLIALLLILGIYINR  
FNLKVAEITERYKCPACFGDSMCQVIDSNEISFEYTFDYSIFNNLFSVKNVYGYK  
DKKVIKKLAQESLKTFFDEMICSDDDELHELQYQESRQKQDSTNFYKLVSELANVGGD  
INNMRLCPTTTKLEKLFVNVKQSHAENEDYFKYLWSTIKINPEPLILQILPAKEGWPT  
PKYFGACGRIVEEYIGLPLSSFIDEPWIRRAKIASLLQADTLMSKNSEFAFYLTDIS  
MDNIAVNNEDKAI FVDLENIIVEKNPPEKALVGIESWNETYNAVDLDCQCFVSPND  
ICSHKVS DHNFYAICQHILTQALGAVFHNQGLHDPDYILQKHPTLIDLLEQCAKPDIG  
YSRIDIAHKLIVLLDSVIKNA  
>AaegyDIA1  
MSQHRILTKLHLVALFLWIVMKYQPEERASSLKSQVQCCQYDITLCPGCFPRPVNCSFF  
ENLKSIDSNELEFEEELTHFNQHGVRGTLSGSEQRVVVKLNKEHGVEELISSICNDLKI  
YRNCRLRNKEPYLRVLRQRVLDNDNQLGAILCPLMDEEALKRFLFEIDENDLNKILLMRI  
NAQPLLLKLLQERNFPVPKLIFQGGFTLVESYEGEALAKYDRPLNVRLLIANELIKASL  
NFTAGVDNFRFYLTDISPDNIVVMSSEEEIKVTFVDLNNVILDSHSHKRLKPSKQKHVH  
SRIDCDGCFAYIQEDICVHQISDINLFAVCQLLENLNGDSKRGFLHSLGTDSKLEAFRK  
LLHQCVYQPPYCEDRQEVLRIMEI IHDVLEHEV  
>AgambDIA1  
MQSSRLPYFVTLFIAVVLQYLPNEKSTSKRPLENVCYDRNILCPECVSSGLECNKFDL  
FTLQDDNVFNIINNIFNSHTTRIGTIVQENKLVAMKHLNRDNTIEKLLQEYCDAYSITKQ  
NCRWAQHDGSDVRAKEFITTSILDSARVEGCFPCATNNRQSLQRFSLFDSTDNELWNL  
LAVRTNVEPELLKLLTVNYHDEPLYVPKLLHFTGFSIIETYEKGTLEHYDFPFVTRMR  
IAELIRAGFKFTEGIHGFRVFLTDINPDNVVNLKNDNKQVYVSIVDLDNVILLDSWAE  
VFLTKNTHHVHVKIECNGCFAYVQEDVCRYQNSDLNLFATCQLLENLNGHYAKGLLHYD  
RDAEAFVPLGEASKMLQNLLESECYVQPPDCQNRSHILKMDLHIIDQTTIQS  
>CpipiDIA1  
MSSGFQRILVNLHILALLFCVIFEFQPKEPESLTELNVQCEYETQHLCPECFVSPTVNC  
GHLANFVITDSSNPWNQLTCRYNPHGVSYGLLGSQKVVIKTLNKNRAVEALRDAVCDEL  
GLTQSNCKFKSDENTIKVLRKRVLEQLEGGCII CSPKDEKALNRLLEVEGTELLQLILL  
KVNVPPLLELFDGRGFPVVKVIFQGGFLFESFDGDALVNFYDSSLNIRLRIAKELIQA  
SFLTEGVNGFRFYLTDISPDNIAVQAQPSGSFQVSVIFDLDNVILDSQSKRLDRRSKAR  
NIHSRIPDCGCFAYVQEDLCSYQHS DINQFAICQLLYENLNGDREGGF LHIQPNDSQPR  
LSEIRQLLHHCYVCPDPDCRDRQGLLQVQEI IDGILVES  
>DyakuDIA1  
MHLSPGQLKVVILIALLQELQVVKPQREVQELFEKDLRLCPNCF  
FGQRELCGEIFQKIAEPSDWSKLLKAI SLLVDRRAIYFLRFKQDQVVAKRKI IDAQN  
QQIKDVKKAFYELGERPGGFHL CRTPSRKRPFVSYLEQRGHASASVWFYMMHYVSPLL  
MQELYLQGFVPVPTTYASCGLTHFQSNAGRTL AHYVDAEGLRVELALQLIQLSLKT  
GFSDFRIMLTDFTGDNFAYDEHTKKVYLIDLDSVVLVDASATGQAEKYEPLPGEFT  
FDVSAFCSGHQLDANIYQACLLLRDYLLKLNLNNERLQLLLEQCVCACQDDFCMDRFQHA  
YDLIKMLDSKN  
>DmeIaDIA1  
MHLSHGQLKVVILIALLQELQVVKPQREVQELFEKDLRLCPDCF  
VGQSEPCGEIFQKIAEPSDWSRLVKAISLLVDRRAIYFLRLKDRDQEVQLVAKRKIID  
AQSNQIKNVKDFYELERPGGFHL CRTLAREPRFVSYLEQRGHAAASVWFYMMHYVS  
PLLQELHLQGFVPVPTTYASCGLTHFQSNAGRTL AHYVDAEGLRVELALQLIQLSL  
LTFGFADFRILTDF TADNLAYDEDTKKVYLIDLDSVVLVDASFAAGHAEKYEPLTGE  
GFTFDVSAFCSGHQLDANIYQACLLLRDYLLKLNLDNEKQLLLEQCVCACQDDFCMDRF  
QHAYDLIKVLESNN  
>DpersDIA1  
MHLSPGHLRIVLILIALLQDLQVVKPQKDFRAHLERDLQLCPACF  
AGQRWQCEEIFEAIAEPSDWSKLLKGIALLIDRREIYFLQLNERHQAQALVAKRDAIG  
GHSYRNMGILREAFLEMEERPGGFQLCRSGFRTPRFVSYLEQRGHEAATIWYMMHSI  
TPLLQELFLRGFPVPRS YAACGLTHFQAYAGRTL VHYATAGENLRLEMARQLLQLSL  
KLTFGFADFRIFTDF TADNLAFDEASQSVLIDLDSVVLVDAAVPLGDAQYKYEPLP  
DGFTFDVKSFCGGQQLDANVYQACLLKDFLLRDLANGRLEMLLEQCVRCDATCDMR  
FQQAYDLIKLLGELLGS  
>DpseuDIA1  
MHLSPGHLRIVLILIALLQDLQVVKPQKDFRAHL  
ERDLQLCPACFAGQRWQCEEIFEAIAEPSDWSKLLKGIALLIDRREIYFLQLNERHQA  
AQLVAKRDAIGGHSYRNMGILGEAFLEMEERPGGFQLCRSGFRTPRFVSYLEQRGHEA  
ATIWYMMHSITPLLQELFLRGFPVPRS YAACGLTHFQAYAGRTL VHYATAGENLR  
EMARQLLQLSLKLTFGFADFRIFTDF TADNLAFDEASQSVLIDLDSVVLVDAAVPL  
GDAQYKYEPLPGEFTFDVKSFCGGQQLDANVYQACLLKDFLLRDLANGRLEMLLEQC  
VRCDATCDMRFQQAYDLIKLLGELLGS

>DerecDIA1  
MHLSPGQLKVVLILALLQELQVKPQREVQELYEKDLRLCPDCF  
VGQSELCVGFQKIAEPSDWSKLLKAIISLIVDRRAIYYLRKDKQAVVAKRKIIDARN  
HKAENVEKAFYEQEEQPGGFHLCRTPSRKPPRFVSYLEQRGHASASVWFYMMHYVSPL  
LMQELHLQGFVPVPTTYASCGLTHFQAYAGRTLNTYFEAEGLRMEALQLIQLSLKLT  
FGFSDFRIFLTDFTGDNFAYDEDSKRVYLIDLDSVVLVDASSAAGQAEKYVPLPGEF  
TFDVSFAFCSGHQLDANIYQACLLLRDFLLKNLDNERLQLLLEQCVACQDDFCDMRFQH  
AYDLIKVLDSKI  
>DsechDIA1  
MHL SYGQLKVVLILALLQELQVKTQREVQELFEKDLRLCPDCF  
VGQKEQCQGEIFQKIAEPSDWSRLVKAISLIVDRRAIHYLRKDKQDQAVQLVAKRKIIN  
AHSYQMKNVKRAFYELEERPGGFHLCRTLAREPRFVSYLEQRGHVYGSTSVWFYMMHY  
VSPLLMQELHLQGFVPVPTTYASCGLTHFQSYAGRTLAHYVNAEEGLRLELALQLIQLS  
LKLTFGFADFRILTDFTADNLAYDEETKVVYLIDLDSVVLVDASSMAGQAEKYEPLA  
GEGFTFDVSFAFCSGHQLDANIYQACLLLRDSLKKNLDNEKQLLLEQCVACQDDFCDM  
RFQHAYDLIKELESKN  
>DwillDIA1  
MHL LYGQLKVVLVLLALLQELDVRTQKDI FRKHFNMDLLECPQCF  
LGQREQCCKFFDTIEEPAKLDRWLKDLTLLVDPREIYWLELLENRENKVLAKRKMTR  
KISKDLHFNPGGFQMCNRNSTRFLAYLEERGYLPATIGYIIHHSISPLLMQELWIMDFP  
VPRSFVAVCGSTLFFQAYAGSTLSNYLKAPIDLREMAKQLLQALKLSAGFKGFRILYLT  
DFTADNFAYNEANGTYLLIDMDTMVLESNDEAESEQLSKKYKFPGEFTYDVNAF  
CDNQDLANIYQVCLLLRDQLLPDVKNHRLKEMLNDCVQCEDDKCDIRFKYANNLIDL  
LVEINNKIEIL  
>DananDIA1  
MHL LSGQLRIVLVLALLQDLQVKPQKDI FQEHFESDLRLCPACF  
SAQREQCQEEVFAIREPSDL SKLWKAVTLLFDRREIFWLEIGSQEKSQLLAKRKSI  
VASHQSLSSQLQEEFLNLEERPGGFHLCRTAQKSSPFINYNLQRGYDSSSIYFYMLHNI  
SPLLMQELQNLDFPVNTYAI CGLTHFQAYAGRTL NHYTEAAEDLRREIARQLIHLSL  
KLTFGFADFRIFLTDFTSDNLTFDETRRVLIDLDSVVMVDAASTSGQAEKYEPLPG  
EGFTFDVSFAFCSGRQLDANVYQACLLLRDFLLKDLNERLQLLLEKCEVCQDDLCDMR  
FQYAYDLIKLLDS  
>CintedDIA1  
MLLKMRYLTVWENGYIVFIFILITLEVLEMYNHRSQGSTRVMEAKLLSDKWSATSP  
TCGNFSCFGTSLCKNRNRVGLSEDPVTLRSGWLSIYGELVDLHRVKNLVTYKLPSTLPCN  
GETCSVQIETSVLSGNNVKNWICKFKKPTNCDTGKVFKSWRAMNKITSAGRLDPNLLK  
DISPPLQCPSTRIADRIVRRVANKQGGVLLRDL SYTEKKRIFTCKMSPGSSVQSMFPPY  
EGWLFQRTVSGCALMVHGRSIVTSLYELYDAPWVRLDVAIQLLDLAEHFTYNDLNMYM  
ALHRLTPRDIGISDTGKLRINKADNVILDNNSKNDKGLYEVRYKQEKVDITEENLCDHS  
ENDVNYVICRHF LGTGWKERKGGKYPGGLLHDPKEFVFSQQMFVLLDICSRGKTAVAP  
ERRTLSHSIRRLAANQLRNVLERRRICSPDFKYRYPECELAEDAGINLPSIELQWLH  
>NvectDIA1  
MHFGGILRKRRIICRLVLLLIVISFSDDLWLSYQDGRAIKWDFSSQHKLTFQEI GLNK  
CPACFGINLSICHKLLGGGVTVKSNTPWSEERIKGVSYGLWGAVKQRVVLKLTGTSSSELT  
AFDNEICRGGVGDNSCKISQEAWSDVLPKPPQLDQAVRKYFDCPSTRFLEKIESVYGOE  
TGGQLSLVETIHLITGLHLNPEL LLLQIFRQEEGWPFPRFYGVCGRIMVVEDSGPPISSF  
LEESWDVRAQIAVNLI TLAHQLSALDDWALYIADPAPGNFVSDSGVTLDDLEHLVVV  
DLSEVQMEEANDKPKPSDCSQPDCLSFSPDMCSGGSRDHNYAICQGVLAGSSRRQGLL  
HNPPVALKASLNQLLQDCTAQDMRNTREETAQKLSSELLQGYL  
>BflordDIA1  
MRLVRLRQFRFFSGWRVRRMCGFFFFVVFYCFVFPQFSYNQLTDTTFLGEDKCPACFGTDLCEEFENG  
KILFKYSSRLRILDFINIKNVYFAIYEGMEVALKRLGHNSEFDQLDRWICETGKEGPQCHIPSVTYYSNF  
SRVIEYGLSPKSLGDMSDMVRCPQRSRLIDRVLEKFAEHLGKETEELSYQEKHLFLSTLKNPEPLMLQTF  
PITEGWPFPPFYFACGRLTVVQKCDKTLASYSAPWLKRVELSLQMMKIAEYLTNNEADFGLYLTDISYE  
NFGVTSQGNLFIIVDENVIVVDKQIKADKPRNWEARYQSHFDECPGMSNCLSFVDSALCRYLHHDHNY  
AVCRNMLESEYASEMGKPGGLLHDPPEVTVRDTGLQRLLAECAKPRTYLGRFDAAKELIELLGSFLKDR  
>TrubrDIA1  
MLRFLPLKLGRLRYRCLKLLVVGFLVILLMNTHNLFAFQKNELTDRRFINLNKCPACFG  
TSWCRKFMNGQVSFETWGRFLRFLDVFNKVNYYFAQYGEPREGTRRVVLKRLGNSQELADI  
DQKICKRATGRPRCDLIQAMYKTEFARINGDVRLLTPEVVEGWSDLVHCPQRSRLDRVVR  
RYAETKDSGSLKLNKLDTERMQLLMTLAFNPEPLVLSQFSPDEGWPFKAYL GACGRVVA  
VNYVGEELWSFYNAPEWKRVDLARQLMDIAEQLTNNDFFALYLLDVSFDNFVAVGPRDG  
VIIVDAENVLVADKRLIKQNKPENYDWWYESRFEEDDREACLFSKDSLCSRVTVDHNY  
AVCQNLLSRYATWRGTGGLLHDPPEAHIAKDGQLEALLDECTKPKKRFGRFQAAKELREY  
LTQLAASSSSLSAR  
>PpygmDIA1  
MWRIVPPKLGRLSRSLKLAALGSLVLMVLHSPSLLASWQRNELADRRFLQLNKCPACFG  
TSWCRRLNGQVVFEAWGRRLRLDFLNVKNVYFAQYGEPREGRRRVVLKRLGSQLAQ  
LDQSI CKRATGRPRCDLQAMPRTFARLNGDVRLLTPEAVEGWSDLVHCPQRSRLDRV  
RRAETKDSGSLRLNLDKSERMQLLTLAFNPEPLVLSQFSPDEGWPFKAYL GACGRMV  
AVNYVGEELWSFYNAPEWKRVDLAWQLMEIAEQLTNNDFFALYLLDVSFDNFVAVGPRDG  
KVIIVDAENVLVADKRLIRQNKPENYDWWYESRFEEDDREACLFSKSEL CARATVDHNY  
YAVCQNLLSRHATWRGTSGGLLHDPPEIAKDGRLLEALDECANPKKRYGRFQAAKELRE  
YLAQLSNNVR  
>SsalaDIA1r  
MPLKRCDQRAVGSVRLTVCVLSWLLCVCWAPSVEPAGTPPAPQKALILQRAFLGLDKC  
NACVGT SICKLLKQIRFDWMSFDTTPLAEKQSFPGNLDDLSWRPVVLSFLSSPC

LHSSSDRSICRSVGRQGPCSIEAVLRVTPRFQSLNQHSHLLPHIVKGLAPPLLRCPQRSRL  
LDRIVRRYAEVVDVGVQMKHFSERDKLRLLYTLAVNQQLILQMFPGTEGWFFPRYQGS  
CGRMLVMWASSRPLWGLYGSREFVQRVDVAYQLLHITQGLGHNSLGLLQYTRLGEMFQ  
LLDDQRVITDASSIVIDLEQGFPPDPPSQTGSDGDFISCLGQGTSPCHRSPPCSSVRP  
TQSLTLLCTALLPRLLLTERGAQTTRLPMEGEAEAGRLARLDRVPLLLGVCADPSQPDWRIM  
AAVGLMDLLKPMRPNPHYTYRYPECRYNQDY

>MdomeDIA1R

MESVIHGPLASPLGLWTLQLVTLSCISSTESLTAPSSVPRVKSSYNFGRFTLGLDKCN  
ACIGTISICKKFFKEEIRFDNWLASHLKLPPDYFSTYPANYSDDTKSWRPVEISRLISKYQ  
HELSDRRIICASASGSKTCSI ERLVLRKTERVKKWLKAKRLTPDLVQGLPSPMLRCPQRSLL  
DRIVRRYAEVADAGSVFMDHFTDRDKLRLLYTSLINAHPIMLQIFPGAEGWPLPRYLGS  
GRFLVSTSTQPLEEFYSSPADQAADLAYQLLGLDLSLRNNDLNFFYFTRIDAGTFGIFD  
NGHLFIRDASTVGVIDKQGRSLTLDRQEESKDFISCLVLDQSPFPSCSSVKEKQSWVMA  
CQQLLPQLLKEKFPQIQEQIDSALVLCGNSSLSQEVIEAASRLKAILKPLRTRCDPRYA  
YRYPDCKYSDRY

>RnorvDIA1R

MELGRPGAATAFRQRWPAWMLLWVSTLSCSFLPASLPPSLVPRVRSYTLGKTFGLGD  
KCNACIGTISICKKFFKEEIRLDNSLVSHLGLPSQDLSYAANYSDSKTWRPVEISRLVS  
KYQSEISDKRICASASGPKTCSIERILRKTGRFQKWLQAKRLTPDLVQGLPSPFLHCP  
RLLDRVRRYAEVVDAGSIFMDHFTDRDKLRLLYTLAVNAHPIILQIFPGAEGWMPKYL  
GSCGRFLVSTSTRPLQEFYDAPPEQAAD IAYQLLGVLESLSRNDLNFFYFTHVDAGMFG  
IFDNGHLFIRDASALGIIDKQEQASQAADRTGENEDIFSCLVSGCQVMSQSDTVPEKQNL  
VLVCQQLLPQLLRGKFPSPVQEQEIDSALSLCSKDASTNLEVFAGTSLLNILRSLRTRCDP  
RFAYRYPDCKYNDRF

>MmulaDIA1R

MEPQLGPEAAALRPGWLALLLWVSALSCSFLPASSPSSLVQVTSYNFGRFTLGLDKC  
NACIGTISICKKFFKEEIRSDNWLASHLGLPPDFLLSYANYSDDSKIWRPVEIFRLVSNY  
QNEISDRRICASASAPRTCSI ERLVLRKTERFQKWLQAKRLTPDLVQGLASPLLRCPQRSRL  
LDRVRRYAEVADAGSIFMDHFTDRDKLRLLYTLAVNSHPILLQIFPGAEGWPLPQYLG  
CGRFLVSTSTRPLQEFYDAPPEQAADLAYQLLGVLESLSRNDLNFFYFTHIDAGMFGV  
NNGHLFIRDASAVGVIDKQEGSQEATRAGENKDFISCLVSGCQALPSCSEVSEKQSLVL  
VCQKLLPRLQGRFSPVQDDIDSALAQCGDSTRPDEVLGAASWLKHLRPLRTRCDSRF  
AYRYPDCKYNDKF

>BtaurDIA1R

MEPRLGPKAAALHLGWPFLLLWVSGLSYSVSSPASPSPPSVSRVTSYNLKGTFGLDKC  
NACIGTISICKKFFKEEIRFDNGLALHLGPPDDLPSYSANYSDDFKTWRPVEISRLVSKQ  
QNKISDGRICASAAAPKTCSI ERLVLRKTERFQKWLQAKRLTPDLVRLGLSSPLLRCPQRSRL  
LDRVRRYAEVADAGSIFMDHFTDRDKLRLLYTLAVNTHPVLQIFPGAEGWPLPQYLG  
CGRFLVSTSTRPLQEFYDAPPEQAADLAYQLLGVLESLSRNDLNFFYFTHVDADMFGIF  
NNGHLFIRDASALGVIDRQEGSQEASGADNKDFISCLVSGCQTKLPSCDTIPEKQNLVL  
VCSQVLPQLLQAKFPSPVQEEIDAELTRCADGTRPDEVLGAASRLKILRPLRTRCDPRF  
AYRYPDCKYDDKF

>GgallDIA1R

MGRWICCLCSRVDWMLLLVLARSSNPAAATASPSAPHVRPSYSFGRTFGLDKCNAC  
IGTISICKKFFKEEIRFDTWLSSHLKLPYLLSYLGNYTDDA  
QSWRMVDITRLTTYQHADRADQHICTSLKTKTCSLERALRRTHRQKWLRAKRLTPDLV  
QGLSSPMLRCPQRSRLDRIVRRYAEVVDAGS IYMDHLTDQDKLRLLYTLVNSHPILLQI  
FPDVEGWPFPRYLGSGRLLVVSASTRPLRDFRAAPEVAADLALQLLAVLHSMGTNDLN  
FFYFTRVDVGTGFGVFNHGLFIRDASTLGIIDKEEGSQPIDGQEQYKDFISCLTVDCQSA  
FVSCNSIREKQSLVMVCQELLPKLLRGKFLPPVQEKIDSFQHCHEGLADDQVNEAMAK  
LAQLLKLRLRCDSRFAYRYPDCKYSDKY

>DreerDIA1R

MAGIWSGVWILCFILVFGTADPSPAPQDKSHDFRKIFLGLDKCNACIGTISICKKFFKDEI  
RFERRLTAQSNLSSADVRSYEGNYTDS TAGWRPVVVSRMLSPHLHQLSDNSICTSAGKQ  
SCSIEGVLRSRFTWVHNSLLPSMVKGLVTPMLRCPQRSRLDRIVRRYAEVVDVGSV  
QMKHFNEDKLRLLYTLAVNQQLILQMFPGTEGWPFRLYHGSCGRMLVMWASSRALRRLF  
SSPLERRADLAYQLLHITQSLANSRLRFLYTRIPEDMFGILEDNKVFIVDTSTIGIID  
LQEGHPPDKDLLPEELDVFSCLSGSCVRPPCETVREAQSFILLCYIILNLLTSNDKQS  
GLPRAAVDELVCADPSQLDQTI IKSQVSLKNILKTRPCSPQYARYRYPECLYSDKF

>MmuscdIA1R

MESQWRGAAATAFHQHWRARLLLWVSTLSCSFLPASLPPSLVPRVRSYTMGKTFGLGD  
KCNACIGTISICKKFFKEEIRFDNSLASHLGLPPQDLHSYAANYSDSKTWRPVEISQLVS  
RYQIEISDRRICASVAPKTCSI ERLVLRKTERFQKWLQAKRLTPDLVQGLPSPFLRCP  
RLLDRVRRYAEVVDAGSIFMDHFTAGDKLRLLYTLAVNAHPIILQIFPGAEGWMPFRYL  
GSCGRFLVSTSTRPLQEFYDASPEQAADLAYQLLRVLESLSRNDLNFFYFTHVDAGMFG  
IFDNGHLFIRDASALGIIDKQEQSQAARTGENEDIFSCLVSDCQIQLSQSDTVPEKQSL  
VLVCQQLLPQLLQKGFSPVQKEIDSALSLCSKDNSTDEVLGATSWLKDIRSLRTRCDP  
RFAYRYPDCKYNDRF

>HsapiDIA1R

MEPQLGPEAAALRPGWLALLLWVSALSCSFLPASSLSSLVQVTSYNFGRFTLGLDKC  
NACIGTISICKKFFKEEIRSDNWLASHLGLPPDLSYANYSDDSKIWRPVEIFRLVSKY  
QNEISDRRICASASAPKTCSI ERLVLRKTERFQKWLQAKRLTPDLVQGLASPLLRCPQRSRL  
LDRVRRYAEVADAGSIFMDHFTDRDKLRLLYTLAVNSHPILLQIFPGAEGWPLPKYLGS  
CGRFLVSTSTRPLQEFYDAPPEQAADLAYQLLGVLESLSRNDLNFFYFTHIDAGMFGV  
NNGHLFIRDASAVGVIDKQEGSQEANRAGENKDFISCLVSGCQALPSCSEISEKQSLVL  
VCQKLLPRLQGRFSPVQDDIDSILVQCGDSIRPDEVLGAASQLKDIRPLRTRCDSRF  
AYRYPDCKYNDKF

>EcabaDIA1R  
MEPWLGPAAAAALRPGWPALLLWVSALRCSVSSPASPSLVPVRVTSYNFGRTFLGLDKC  
NACIGTSCICKKFFKEEIRFDNRLASHLGLPSGYLPSYSANYSDDSKTRPVEVSRVLSKQ  
QNEISDRRICAFAAAAPTCSIERVLRKTRRFQKWLQAKRLTPDLVRLGLPSPLLRCPQRS  
LDRVVRRYAEVDPDAGSIFMDHFTDRDKLRLLYTLAVNAHPILLQIFPGAEGWPLPRYLGS  
CGRFLISTSTSPLEQEFYSAPPDQAADLAYQLLGVLESLSRNDLNYFFYFTHVDAGMFGIF  
NNGHLFIRDASTLGVIDRQEGSQAAARAGENKIDIFSCLLSDCQAELEPSCDTPVEKQSLVL  
VCRQVLPRLQKGFSPVQEEIDATLTWCGEDTRPDAEVLGAASRLKIDILRPLRTCDPRF  
AYRYPDCKYNDKF  
>DordiDIA1R  
MDPQLGPAAAAALHPGWQVLLLLLVSVLSCFSSPASPPPSLVSrvrtsynlgrtflglgdkc  
NACIGTSCICKKFFKEEIRFDNSLASDLELASDYLPSYSANYSDDSKTRPVEIFRVLVSKQ  
QNEISDRRICAFASAPKTCSIERILRKTGRFQKWLQAKRLTPDLVQGLPSPFLRCPQRS  
LDRVVRRYAEVADAGSIFMDHFTDRDKLRLLYTLAVNAHPILFQIFPGAEGWPLPKYLGS  
CGRFFVSTSTRPLEQEFYGAPPDEAADLAYQLLGVLESLSRNDLNYFFYFTHVDAAMFGIF  
SNGHLFIRDASALGVIDKQEGSQAAPKAGENQDIFSCLVSGCQQLLPSCDNIPDKQSVV  
LVCQQLLPQLLQKGFSPVQVEIDSALACGQGIRPDSEVFGAASRLKIDILRPLRTCDPRF  
FAYRYPDCKYNDRF  
>OanatDIA1R  
MGLRLGCRFLSAAALSWMTLQLFLTRGHGFPVADASPAPSLVPRVKPSYSFGRTFLGLDKCN  
ACIGTSCICKKFFKEEIRFDNWPASHLKPPPDHFPYGSANYTDDSKSWRLVEISRLIGKDQ  
NELSDQKICTSVSLVKTCSIERVLRKTERFQKWLKARRLTPALVQGLPSPLLRCPQRS  
DRIVRRYAEVDPDAGSVMYMDHFTDRDKLRLLYTLAVNAHPVLLQVFPGAEGWPKYLGS  
GRLLVSTSTPPLLELSSGPPDRAADLGHQLLGVIEFLRHNDWNFFYFTRIHAGTFGVFD  
NNGHLFIRDASSLGVDRQEGKRPARSPEPRDIFSCLAADCQSDLPSCNTVQEHQSLVLV  
CRELLPKLLEKGFPPVQEEIDALLDRCGDSSLDGQTVIGGARRLMDILKSLRTRCDARFA  
YRYPDCKYSEKY  
>SpurDIA1L  
MGPRIKKLILGSSILFTIFTVQLTGLNSLRDDNNALPSTNGKFRFTVPSKGRKRNL  
LHAGKQKKEELGFDKTRRQLQDIRTADIKGHPRIQAGDETALQDGVQGMKNATVVM  
TTRLOFENLFPSSLEERCPICYGTTNCDQIYAGNISFHVGSVNLSEPHAIRGTWGDRI  
VGKRLVSRVFERLEKICINQSQVDPKRSECVNAAATNSWMSKSSALNRVHKLHQEVYES  
QLIAISATTCASPDDFFEELKQLYRVSRWGTGIASTEEMAILATTMALNPEPALLKFFRNIP  
SLRPFYFTEYLGECGRVILTEPSGKPLSSYLKASWKRVDISLKLQMIEDFDHSSDKWL  
LLLDGFEYENFVMTSEGQLKVVNLGGMVIVDKDQSTSTPDMNPHLNNRTELCDNEDLNTFV  
KQLQTEPDTHCREVPRHVELMYMMACHSLLSMLMTTKYERFFQPLDTPRKHHPGGLMHLDA  
PYEVDVSLSELLYECVFEQGPGRMHVSRVLRLLTIIRGFSYKDAADRTSL  
>BflorDIA1Lb  
MASARRWCRRLLHYSGWTRVLFLLTLMIAVGF IARNYWQVEDDLEARKRISNGGDKKYAQS  
IQEILLAQGIDEKRMREALRQKAEVHRI VKERGEALAKEAQAKAKANVVRINIHKPEL  
NPNQHSWKAIEKMAAHEIEDHKKQPEQYMTFKRLMDAKKCPACYGSLCEQAEVGLIT  
MDVADKTLLEHKGVYFGHFRNTEVVAKRLVKGKDGWTRFDEFICQNASLPKDCDVSHMISDT  
VLVTDNVLQVSLQDAWRIAHTRRSIAEACMTDRLIELIKTAYDENVNGKLSKTERAYM  
ITALLNPEAALLKHFTRAEYWPFPKYLACGRVILVESGGKLLGSAIESPWKERANI  
ALQLLEMDKFRNGDPKVVIFVDFSFNNFVNNYGRLLTIDFDDVMLIDREEFVGENKT  
EPCDLKCFKTFISQIEAMNSYDSCSAMPQYSQMMYALACVRLLSHLPEHLEPNPMDPKP  
DKHRPDSERPRLLWGPPEQEAQVLEELLRGCVEENVAGGRLEAVGELKTFLLRRNAKGEN  
>BflorDIA1La  
MPILVSEAGYGRHGRAMVARRMVRKCLPLLVLSATLAVLYIYLQVQGSPPWVSLGQ  
SQAGNKQKDEYIVWRGEEQKVEVQKQEEKHPAEEPKEKPRQDKSAVTERKPKGVPRS  
LLRNAPCPACLGNLCEFEEDGMIDLGSEVTSWKVKAYTGTWVKVEVMVTQCASEERLER  
FEEFVCRNLSETATSCDPGVLLQEDLKERLQPAHLKKSLEVFHPNTSSSQATTMSK  
PFLKLLQKTFDDNGKRLNRLEQAIPRKKLP IPAFLGACGNLVAETETAGKPLSMYLEVKG  
PWQVRANLSLQLLQMLDDFQNKDPDWLLMFVEVNIENFVSVDGRLILTDLGNMTIINKH  
DLDNSTKRRSVCNEACFRFRTRNLHRPETSCRQAGRYSQLMYARACQIRLGCWQTER  
SGEGRVVLSSSKDASCAYGRLLFGPPREAKQLELDELTECVEETKAGGRITALKQIRVL  
LAA  
>BflorDIA1Lc  
MVIADGNDIDISWAEPEKCPACFGDKCELLRRGHFVKVDSSED  
RYMKGIVSTGRIGGVKVIKSMNEAGAWQRYERFICRSSSRPHVCNASSF ILETMLV  
TDVALKVPWLREAWKICHLEKSALSVCSDRFLDVRQLYVEDGGTDMTKEGDTGRAF  
LSTSLLENEEAVLLRYFTTKSTTPWFPKFGACGRVIVVEHAGRTLDTFMESSWEVR  
ADIALQLLQVLDALREKDPDWLFFLDVSVQNFVAVDSRGWVRLIDLDDVMVIDRRTVV  
NQEQTEMCNEQCYTDFQKKLYSDEYHCDDIFKYAPMMYASICARLLSNLQKHPERRKW  
GEIREYQEGQSIELDEPPVKGFLHNPDEIREALEGALTQCVHETLPRGRGLAVLRLO  
EILGTT
